# Supplementary material for: A little frog leaps a long way: compounded colonizations of the Indian Subcontinent discovered in the tiny Oriental frog genus Microhyla (Amphibia: Microhylidae)
Source: PubMed Central journal article supplement (PMC7337035; doi:10.7717/peerj.9411), 2020-07-03

**Supplementary Figure S1. Geographic sampling in the present study.**

Pink shading corresponds to *Microhyla* distribution; red circles denote localities of samples for which sequences were available via GenBank; green circles denote localities of samples for which sequences were generated in this study. For locality information see Supplementary Table S1. Base Map created using [simplemappr.net](http://simplemappr.net).

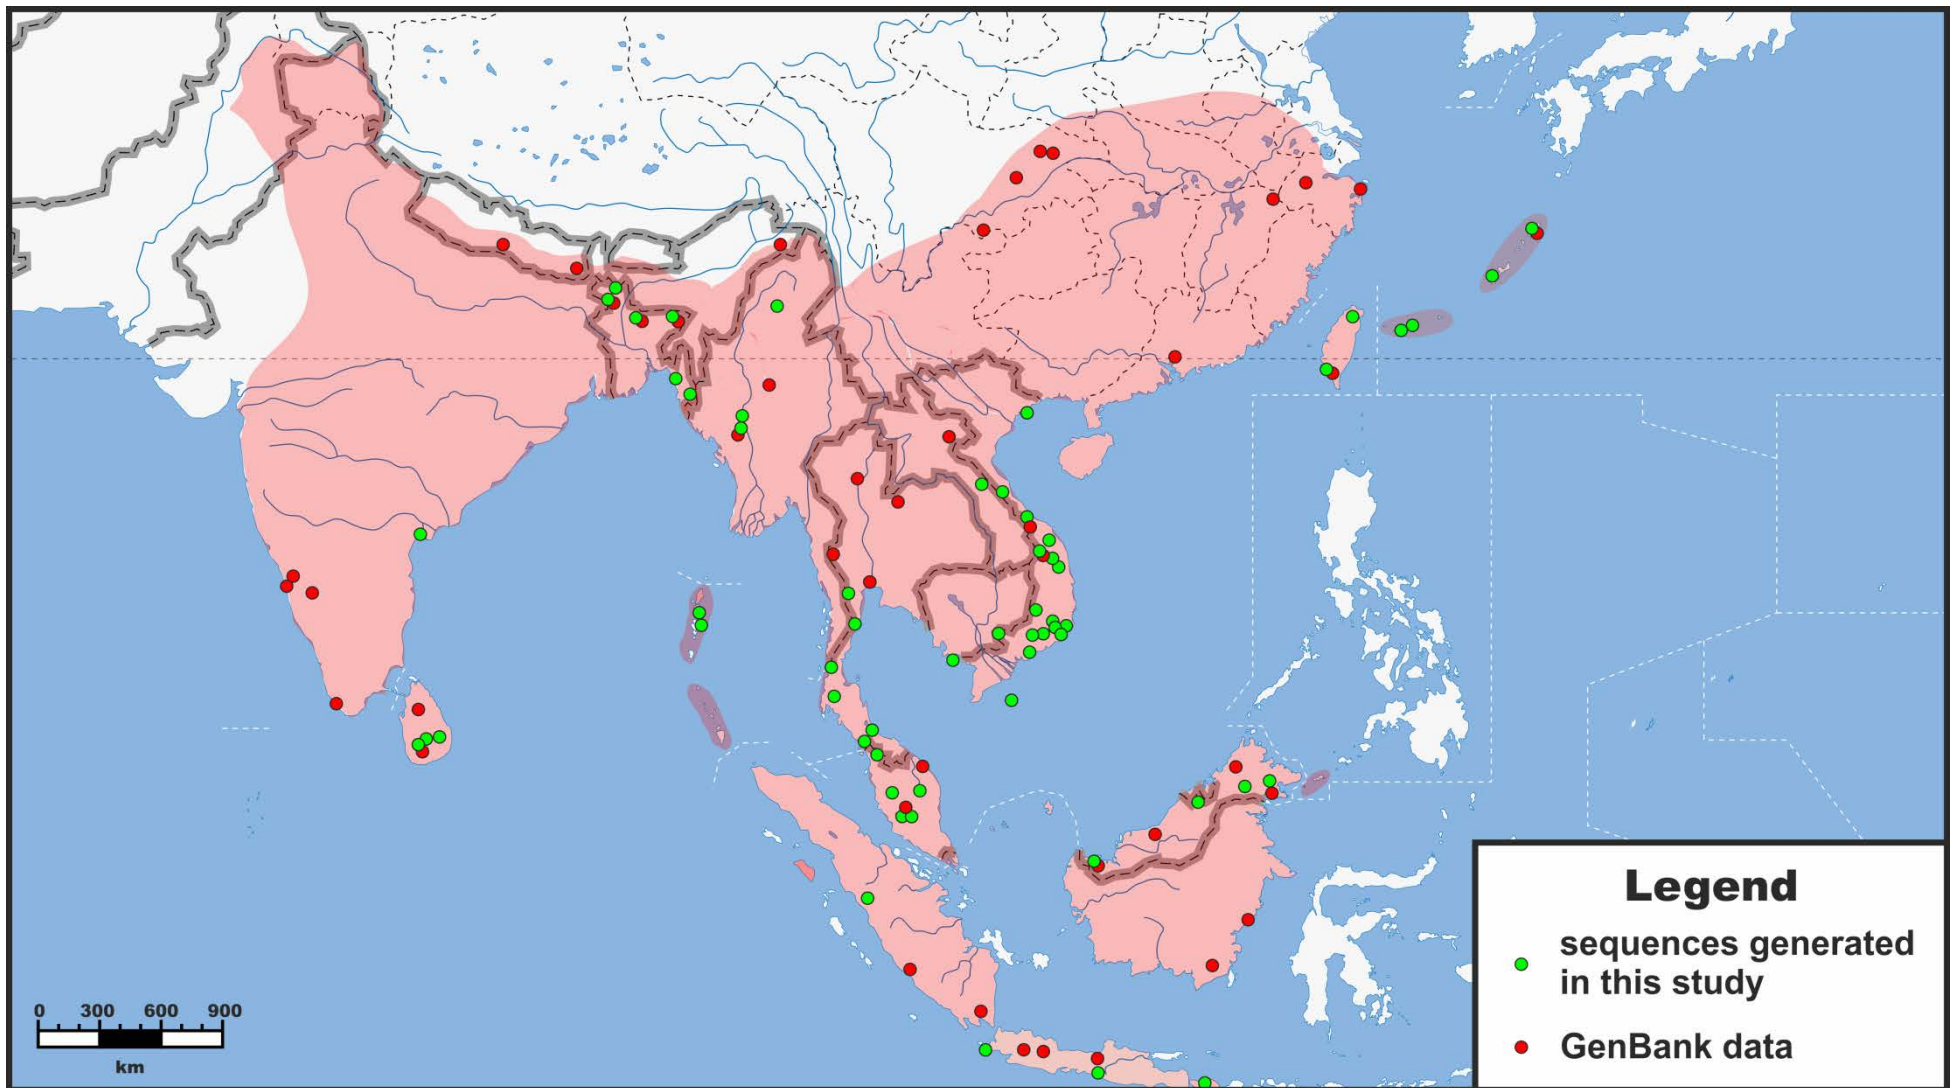

Supplement: peerj-08-9411-s001.pdf [file peerj-08-9411-s001.pdf]
