# Supplementary material for: A little frog leaps a long way: compounded colonizations of the Indian Subcontinent discovered in the tiny Oriental frog genus Microhyla (Amphibia: Microhylidae)
Source: PubMed Central journal article supplement (PMC7337035; doi:10.7717/peerj.9411), 2020-07-03

**Supplementary Figure S2. Updated mtDNA-genealogy of the *Microhyla* – *Glyphoglossus* assemblage (collapsed tree).**

BI genealogy of *Microhyla* and *Glyphoglossus* reconstructed from 2478 bp of mtDNA fragment. Values at nodes correspond to BI PP/ML BS, respectively; black and white circles correspond to well-supported ( $\text{BI PP} \geq 0.95$ ;  $\text{ML BS} \geq 90$ ) and moderately supported ( $0.95 > \text{BI PP} \geq 0.90$ ;  $90 > \text{ML BS} \geq 75$ ) nodes, respectively; no circles indicate unsupported nodes. Color marking of species groups in *Microhyla* species complex corresponds to Figs. 4–5, but not to Fig. 2. Photos by Nikolay A. Poyarkov, Indraneil Das, Vladislav A. Gorin, Parinya Pawangkhanant, Luan Thanh Nguyen, and Evgeniya N. Solovyeva.

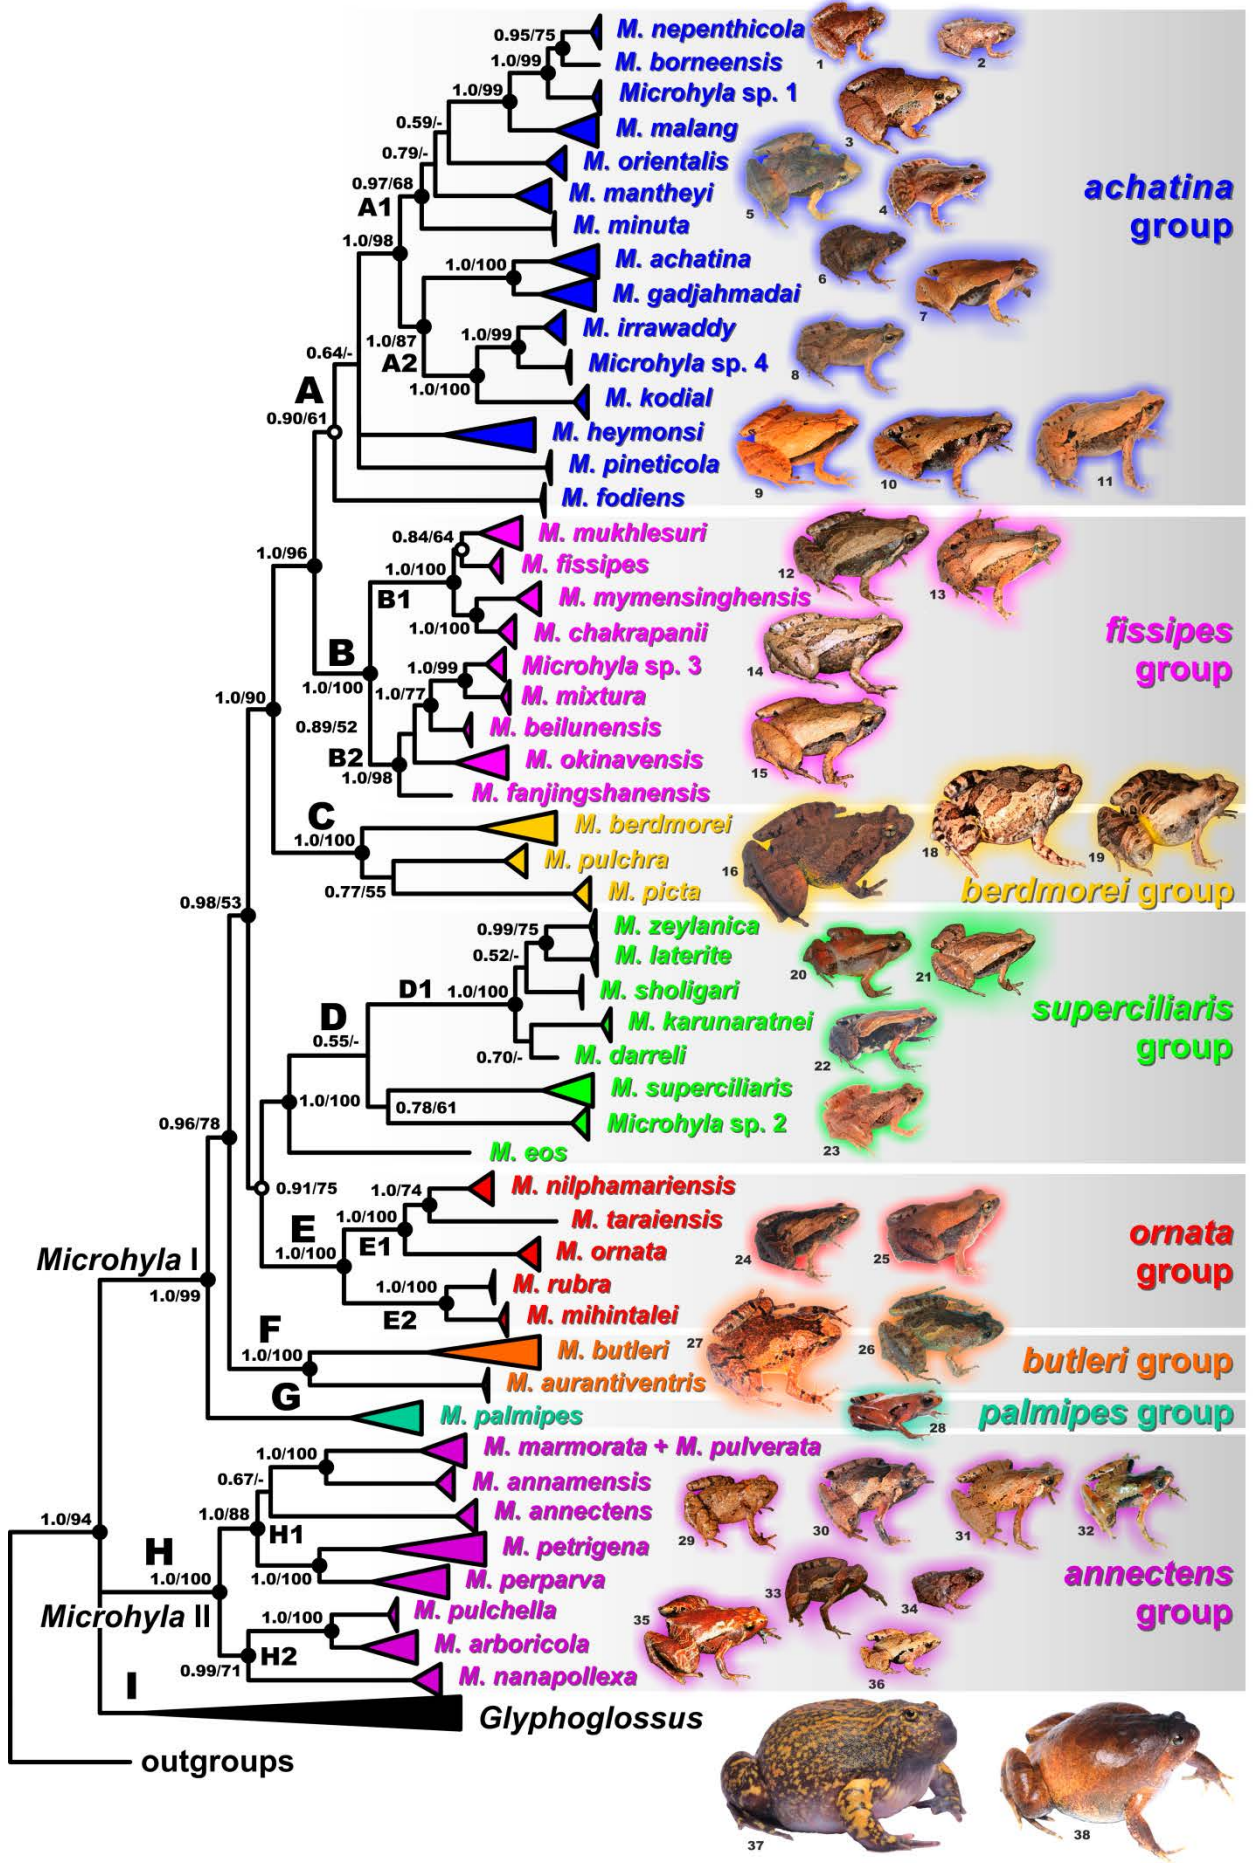

Supplement: peerj-08-9411-s002.pdf [file peerj-08-9411-s002.pdf]
