# Supplementary material for: A little frog leaps a long way: compounded colonizations of the Indian Subcontinent discovered in the tiny Oriental frog genus Microhyla (Amphibia: Microhylidae)
Source: PubMed Central journal article supplement (PMC7337035; doi:10.7717/peerj.9411), 2020-07-03

**Supplementary Figure S3. Nuclear allele median-joining network showing relationships among phased nuclear BDNF gene haplotypes representing 49 *Microhyla* and *Glyphoglossus* species.**

Circle sizes are proportional to the number of haplotypes, circle numbers correspond to sample numbers summarized in Supplementary Table S1, circle colors depict the recognized species groups, small black circles represent hypothetical median vectors, vertical bars on branches represent the number of mutational steps.

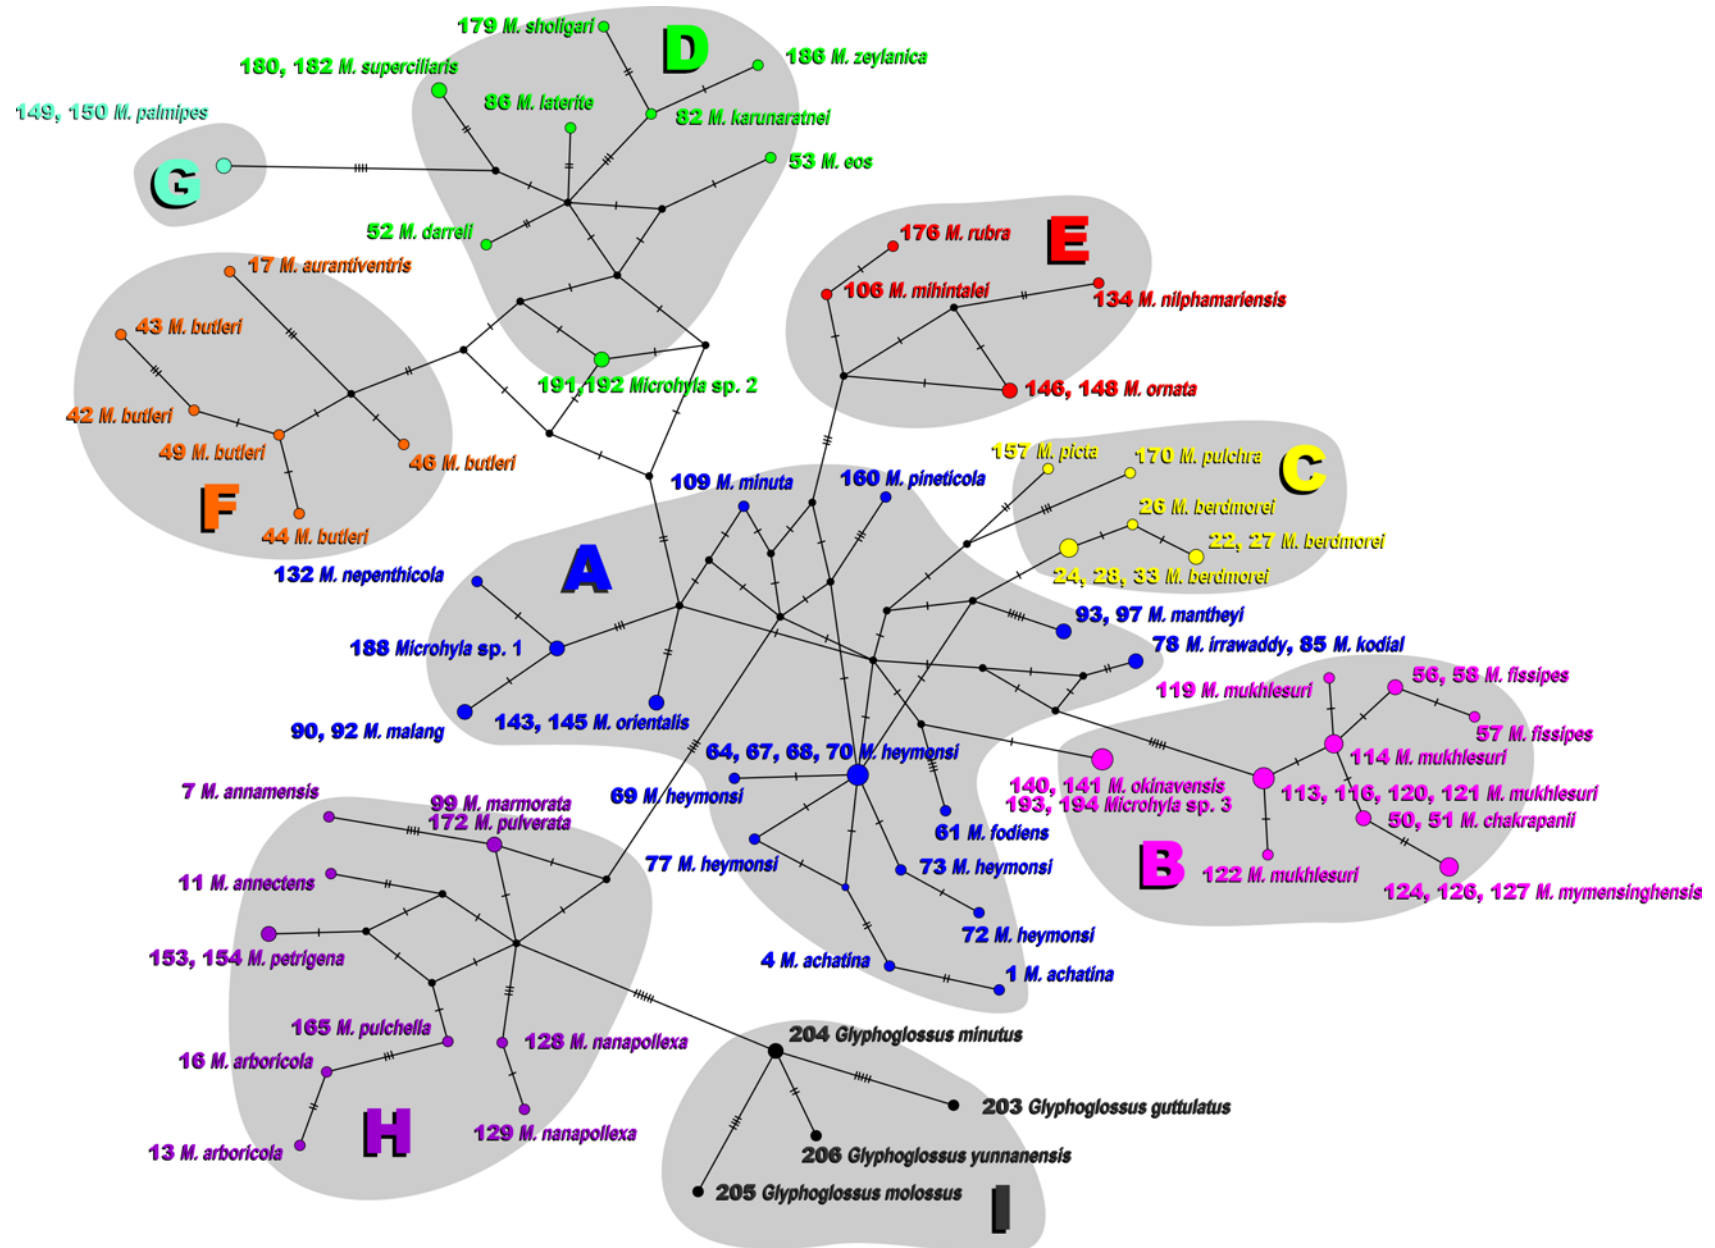

Supplement: peerj-08-9411-s003.pdf [file peerj-08-9411-s003.pdf]
