# Supplementary material for: A little frog leaps a long way: compounded colonizations of the Indian Subcontinent discovered in the tiny Oriental frog genus Microhyla (Amphibia: Microhylidae)
Source: PubMed Central journal article supplement (PMC7337035; doi:10.7717/peerj.9411), 2020-07-03

**Supplementary Figure S4. Bayesian chronogram resulted from \*BEAST analysis of the 3207 bp-long concatenated mtDNA + nuclear DNA dataset.**

Node values correspond to node numbers, for estimated divergence times (in Ma) see Table S11. Red icons correspond to calibration points used in molecular dating analysis, for details see Table S4. Blue bars correspond to 95%-confidence intervals.

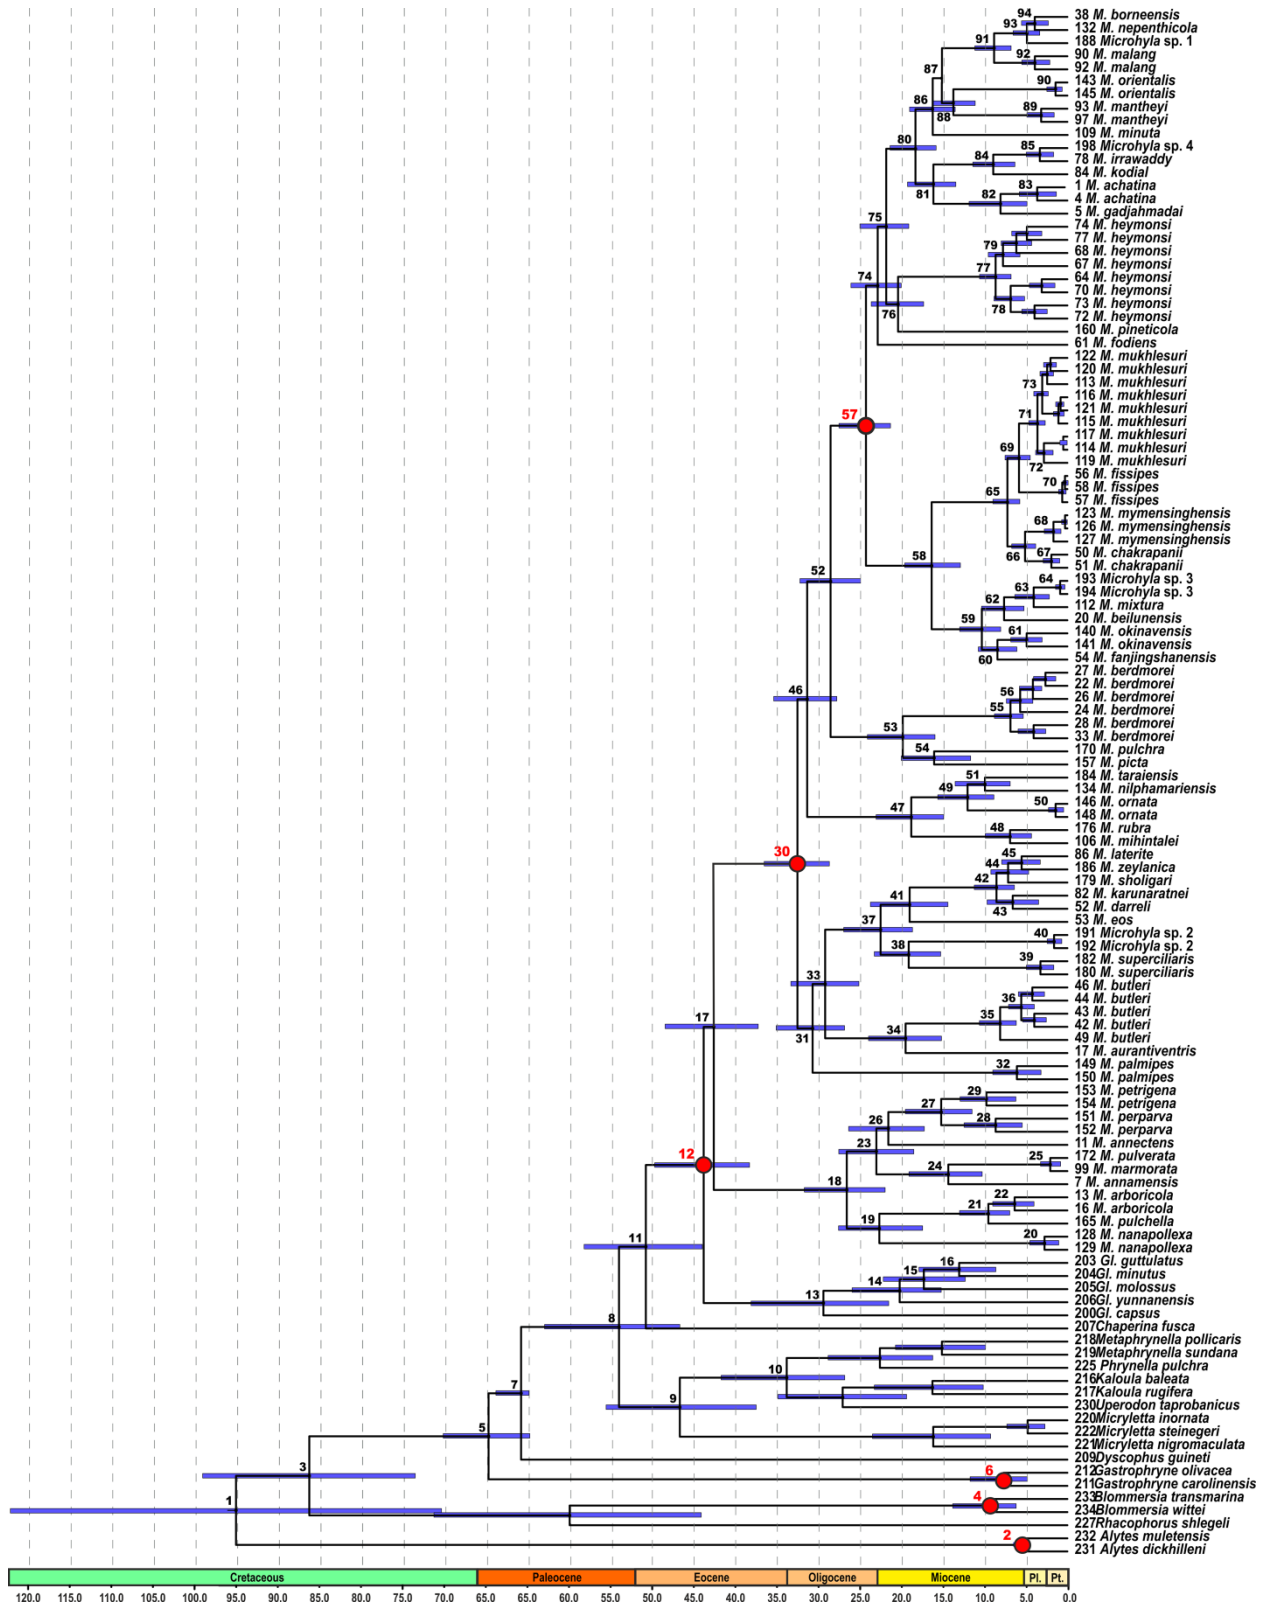

Supplement: peerj-08-9411-s004.pdf [file peerj-08-9411-s004.pdf]
