# Supplementary material for: A little frog leaps a long way: compounded colonizations of the Indian Subcontinent discovered in the tiny Oriental frog genus Microhyla (Amphibia: Microhylidae)
Source: PubMed Central journal article supplement (PMC7337035; doi:10.7717/peerj.9411), 2020-07-03
Supplement: peerj-08-9411-s017.pdf [file peerj-08-9411-s017.pdf]

## Supplementary Information File 2.

### **Additional references in Supplementary tables and Supplementary Information File 1.**

- Agarwal I, Biswas S, Bauer AM, Greenbaum E, Jackman TR, de Silva A, Batuwita S. 2017.** Cryptic species, taxonomic inflation, or a bit of both? New species phenomenon in Sri Lanka as suggested by a phylogeny of dwarf geckos (Reptilia, Squamata, Gekkonidae, *Cnemaspis*). *Systematics and Biodiversity* **15**:1–13.
- Akhtar SM, Chakrabarti S, Singh RK, Moulik SR, Bhattacharya J, Singh H. 2009.** Structural style and deformation history of Assam & Assam Arakan Basin, India: from Integrated Seismic Study. In: *Adapted from oral presentation at AAPG Annual Convention*, Denver, Colorado; 10:2009.
- Andersson LG. 1942.** A small collection of frogs from Annam collected in the years 1938–1939 by Bertil Björkegren. *Arkiv för Zoologi* **34(6)**: 1–11.
- Atmaja VY, Hamidy A, Arisuryanti T, Matsui M, Smith EN. 2018.** A new species of *Microhyla* (Anura: Microhylidae) from Sumatra, Indonesia. *Treubia* **45**: 25–46.
- Averyanov L, Cribb P, Phan KL, Nguyen TH. 2003.** *Slipper orchids of Vietnam with an introduction to the flora of Vietnam*. Portland: Timber Press, 83 pp.
- Bain RH, Hurley MM. 2011.** A biogeographic synthesis of the amphibians and reptiles of Indochina. *Bulletin of the American Museum of Natural History* **2011(360)**:1–38.
- Bain RH, Nguyen QT. 2004.** Three new species of narrow-mouth frogs (Genus: *Microhyla*) from Indochina, with comments on *Microhyla annamensis* and *Microhyla palmipes*. *Copeia* **2004(3)**:507–524.
- Baltzer M, Dao NT, Shore RG. 2001.** *Towards a vision of biodiversity conservation in the forests for the lower Mekong ecoregion complex*. Vol. 1: Main Report. Hanoi: WWF Indochina, 109 pp.
- Biju SD, Garg S, Kamei RG, Maheswaran G. 2019.** A new *Microhyla* species (Anura: Microhylidae) from riparian evergreen forest in the eastern Himalayan state of Arunachal Pradesh, India. *Zootaxa* **4674**:100–116.
- Blackburn DC, Siler CD, Diesmos AC, McGuire JA, Cannatella DC, Brown RM. 2013.** An adaptive radiation of frogs in a Southeast Asian island archipelago. *Evolution* **67(9)**: 2631–2646.
- Das I, Haas A. 2010.** New species of *Microhyla* from Sarawak: Old World's smallest frogs crawl out of miniature pitcher plants on Borneo (Amphibia: Anura: Microhylidae). *Zootaxa* **2571**:37–52.
- Das I, Min PY, Hsu WW, Hertwig ST, Haas A. 2014.** Red hot chili pepper. A new *Calluella* Stoliczka, 1872 (Lissamphibia: Anura: Microhylidae) from Sarawak, East Malaysia (Borneo). *Zootaxa* **3785(4)**: 550–560.
- Das I, Yaakob N, Liat LB. 2004.** A new species of *Calluella* Stoliczka, 1872 (Anura: Microhylidae) from Taman Negara, Pahang State, Peninsular Malaysia. *Raffles Bulletin of Zoology* **52**: 257–260.
- Das I, Yaakob NS, Sukumaran J. 2007.** A new species of *Microhyla* (Anura: Microhylidae) from the Malay Peninsula. *Hamadryad* **31**: 304–314.
- Das I. 1994.** A check-list of the amphibians and reptiles of Andaman and Nicobar Islands. *Journal of the Andaman Science Association* **10(1)**:44–49.
- De Bruyn M, Nugroho E, Hossain MM, Wilson JC, Mather PB. 2005.** Phylogeographic evidence for the existence of an ancient biogeographic barrier: the Isthmus of Kra Seaway. *Heredity* **94(3)**:370–378.
- De Bruyn M, Stelbrink B, Morley RJ, Hall R, Carvalho GR, Cannon CH, Van den Bergh G, Meijaard E, Metcalfe I, Boitani L, Maiorano L, Shoup R, von Rintelen T. 2014.** Borneo and Indochina are major evolutionary hotspots for Southeast Asian biodiversity. *Systematic Biology* **63**:879–901.

- Delacour J, Jabouille P, Lowe WP. 1928.** On the birds collected during the third expedition to French Indo-china. [Part I]. *Ibis*, Series 12 **4**:23–51.
- Deng X, Wang S, Liang X, Jiang J, Wang B, Deng L. 2016.** The complete mitochondrial genome of *Kaloula rugifera* (Amphibia, Anura, Microhylidae). *Mitochondrial DNA Part A* **27(5)**: 3391–3392.
- Diesmos AC, Brown RM, Alcala AC, Sison RV, Afuang LE, Gee GV. 2002.** Philippine amphibians and reptiles: an overview of species diversity, biogeography, and conservation. *Philippine biodiversity conservation priorities: a second iteration of the National Biodiversity Strategy and Action Plan*. 26–44 pp.
- Dutta SK, Manamendra-Arachchi K. 1996.** The amphibian fauna of Sri Lanka. Wildlife Heritage Trust of Sri Lanka.
- Dutta SK, Ray P. 2000.** *Microhyla sholigari*, a new species of microhylid frog (Anura: Microhylidae) from Karnataka, India. *Hamadryad* **25**: 38–44.
- Fernando P, Siriwardhane M. 1996.** *Microhyla karunaratnei* (Anura: Microhylidae), a new species of frog endemic to Sri Lanka. *Journal of South Asian Natural History* **2**: 135–142.
- Fooden J. 1996.** Zoogeography of Vietnamese primates. *International Journal of Primatology* **17**:845–899.
- Fromhage L, Vences M, Veith M. 2004.** Testing alternative vicariance scenarios in Western Mediterranean discoglossid frogs. *Molecular Phylogenetics and Evolution* **31(1)**:308–322.
- Garg S, Suyesh R, Das A, Jiang J, Wijayathilaka N, Amarasinghe AT, Alhadi F, Vineeth KK, Aravind NA, Senevirathne G, Meegaskumbura M, Biju SD. 2019.** Systematic revision of *Microhyla* (Microhylidae) frogs of South Asia: a molecular, morphological, and acoustic assessment. *Vertebrate Zoology* **69(1)**:1–71.
- Geissler P, Hartmann T, Ihlow F, Rödder D, Poyarkov NA, Nguyen TQ, Ziegler T, Böhme W. 2015.** The Lower Mekong: an insurmountable barrier to amphibians in southern Indochina?. *Biological Journal of the Linnean Society* **114(4)**:905–914.
- Geissmann T, Nguyen XD, Lormée N, Momberg F. 2000.** *Vietnam primate conservation status review 2000*. Part 1. Hanoi: Fauna and Flora International, 130 pp.
- Grismer LL, Wood Jr PL, Aowphol A, Cota M, Grismer MS, Murdoch ML, Aguilar C, Grismer JL. 2017.** Out of Borneo, again and again: biogeography of the Stream Toad genus *Ansonia* Stoliczka (Anura: Bufonidae) and the discovery of the first limestone cave-dwelling species. *Biological Journal of the Linnean Society* **120(2)**:371–395.
- Grismer LL, Wood Jr PL, Quah ES, Anuar S, Ngadi EB, Izam NA, Ahmad N. 2018.** Systematics, ecomorphology, cryptic speciation and biogeography of the lizard genus *Tytthoscincus* Linkem, Diesmos & Brown (Squamata: Scincidae) from the sky-island archipelago of Peninsular Malaysia. *Zoological Journal of the Linnean Society* **183(3)**:635–671.
- Grismer LL. 2008.** A revised and updated checklist of the lizards of Peninsular Malaysia. *Zootaxa* **1860(1)**:28–34.
- Hasan M, Islam MM, Khan MM, Alam MS, Kurabayashi A, Igawa T, Kuramoto M, Sumida M. 2012.** Cryptic anuran biodiversity in Bangladesh revealed by mitochondrial 16S rRNA gene sequences. *Zoological science* **29(3)**:162–172.
- Hasan M, Razzaque MA, Sarker AK, Kuramoto M, Sumida M. 2015.** Genetic variation, advertisement call, and morphometry of *Microhyla nilphamariensis* from Bangladesh. *Philippine Journal of Systematic Biology* **9**: 63–80.
- Hasan MK, Islam MM, Kuramoto M, Kurabayashi A, Sumida M. 2014.** Description of two new species of *Microhyla* (Anura: Microhylidae) from Bangladesh. *Zootaxa* **3755**:401–408.

- Igawa T, Kurabayashi A, Usuki C, Fujii T, Sumida M. 2008.** Complete mitochondrial genomes of three neobatrachian anurans: a case study of divergence time estimation using different data and calibration settings. *Gene* **407(1-2)**: 116–129.
- Inger RF, Frogner KJ. 1979.** New species of narrow-mouth frogs (genus *Microhyla*) from Borneo. *Sarawak Museum Journal* **27**: 311–322.
- Inger RF. 1989.** Four new species of frogs from Borneo. *Malayan Nature Journal* **42**: 229–243.
- Khatiwada JR, Shu GC, Wang SH, Thapa A, Wang B, Jiang J. 2017.** A new species of the genus *Microhyla* (Anura: Microhylidae) from Eastern Nepal. *Zootaxa* **4254(2)**:221–239.
- Khatiwada JR, Wang S, Shu G, Xie F, Jiang J. 2018.** The mitochondrial genome of the *Microhyla taraiensis* (Anura: Microhylidae) and related phylogenetic analyses. *Conservation Genetics Resources* **10(3)**: 441–444.
- Kuramoto M, Joshy SH. 2007.** New frogs from the Western Ghats. *Current Science* **93(6)**: 752–754.
- Li S, Zhang M, Xu N, Lv J, Jiang J, Liu J, Wei G, Wang B. 2019.** A new species of the genus *Microhyla* (Amphibia: Anura: Microhylidae) from Guizhou Province, China. *Zootaxa* **4624(4)**: 551–575.
- MacKinnon J, MacKinnon K. 1986.** *Review of the protected areas system in the Indo-Malayan realm*. Gland, Switzerland: IUCN, 284 pp.
- Mani MS. 1995.** *Biogeography in India*. Surya Publications, Dehra Dun, Uttaranchal, India, 1995.
- Manthey U, Denzer W. 2014.** Südostasiatische Anuren im Fokus: Spezies der Gattung *Microhyla* Tschudi, 1838 (Anura: Microhylidae: Microhyliinae). *Sauria* **36(4)**: 31–48.
- Manthey U, Grossmann W. 1997.** *Amphibien and Reptilien Südostasiens*, Natur und Tier-Verlag, Münster.
- Matsui M, Hamidy A, Belabut DM, Ahmad N, Panha S, Sudin A, Khonsue W, Oh HS, Yong HS, Jiang JP, Nishikawa K. 2011.** Systematic relationships of Oriental tiny frogs of the family Microhylidae (Amphibia, Anura) as revealed by mtDNA genealogy. *Molecular phylogenetics and evolution* **61(1)**:167–176.
- Matsui M, Hamidy A, Eto K. 2013.** Description of a new species of *Microhyla* from Bali, Indonesia (Amphibia, Anura). *Zootaxa* **3670(4)**:579–590.
- Matsui M, Ito H, Shimada T, Ota H, Saidapur SK, Khonsue W, Tanaka-Ueno T, Wu GF. 2005.** Taxonomic relationships within the pan-oriental narrowmouth toad *Microhyla ornata* as revealed by mtDNA analysis (Amphibia, Anura, Microhylidae). *Zoological Science* **22(4)**:489–495.
- Matsui M, Shimada T, Liu WZ, Maryati M, Khonsue W, Orlov N. 2006.** Phylogenetic relationships of Oriental torrent frogs in the genus *Amolops* and its allies (Amphibia, Anura, Ranidae). *Molecular Phylogenetics and Evolution* **38(3)**:659–666.
- Matsui M. 2011.** Taxonomic revision of one of the Old World's smallest frogs, with description of a new Bornean *Microhyla* (Amphibia, Microhylidae). *Zootaxa* **2814(1)**:33–49.
- Meijaard E, Groves CP. 2006.** The geography of mammals and rivers in Mainland Southeast Asia. In **Lehman SM, Fleagle JG** (editors), *Primate biogeography: progress and prospects*, New York: Springer pp. 305–329.
- Mulcahy DG, Lee JL, Miller AH, Chand M, Thura MK, Zug GR. 2018.** Filling the BINs of life: Report of an amphibian and reptile survey of the Tanintharyi (Tenasserim) Region of Myanmar, with DNA barcode data. *ZooKeys* **757**:85–152.
- Myers N, Mittermeier RA, Mittermeier CG, Da Fonseca GA, Kent J. 2000.** Biodiversity hotspots for conservation priorities. *Nature* **403(6772)**:853.
- Neang T, Holden J. 2008.** *A field guide to the amphibians of Cambodia*. Fauna & Flora International.
- Nguyen LT, Poyarkov NA, Nguyen TT, Nguyen TA, Tran VH, Gorin VA, Murphy RW, Nguyen SN. 2019.** A new species of the genus *Microhyla* Tschudi, 1838 (Amphibia: Anura: Microhylidae) from Tay Nguyen Plateau, Central Vietnam. *Zootaxa* **4543**:549–580.
- Nguyen SV, Ho CT, Ngyuen TQ. 2009.** *Herpetofauna of Vietnam*. Edition Chimaira.

- Orlov NL, Lathrop A, Murphy R, Ho TC. 2001.** New records of frogs of the family Rhacophoridae (Anura: Amphibia) in the north part of the Hoang Lien Mountains (Mount Fan Si Pan, Sa Pa District, Lao Cai Province), Vietnam. *Russian Journal of Herpetology* **8**:17–44.
- Ota H. 1998.** Geographic patterns of endemism and speciation in amphibians and reptiles of the Ryukyu Archipelago, Japan, with special reference to their paleogeographic implications. *Researches on Population Ecology* **40**:189–204.
- Palumbi, S. 1991.** Simple fool's guide to PCR. Available at: <https://palumbilab.stanford.edu/SimpleFoolsMaster.pdf> (accessed January 15 2020).
- Parker HW, Osman-Hill WC. 1949 "1948".** Frogs of the genus *Microhyla* from Ceylon. *Annals and Magazine of Natural History* **12**(1): 759–764.
- Parker HW. 1928.** The brevicipitid frogs of the genus *Microhyla*. *Annals and Magazine of Natural History*, Series 10 **2**:473–499.
- Pauwels OS, David P, Chimsunchart C, Thirakhupt K. 2003.** Reptiles of Phetchaburi Province, Western Thailand: a list of species, with natural history notes, and a discussion on the biogeography at the Isthmus of Kra. *Tropical Natural History* **3**(1):23–53.
- Pauwels OSG, Ohler A, Dubois A., Nabhitabhata J, Laohawat OA, Chimsunchart C. 1999.** *Kaloula baleata* (Müller, 1836) (Anura: Microhylidae), an addition to the batrachofauna of Thailand. *Natural History Bulletin of the Siam Society* **47**(2): 261–264.
- Peloso PL, Frost DR, Richards SJ, Rodrigues MT, Donnellan S, Matsui M, Raxworthy CJ, Biju SD, Lemmon EM, Lemmon AR, Wheeler WC. 2016.** The impact of anchored phylogenomics and taxon sampling on phylogenetic inference in narrow-mouthed frogs (Anura, Microhylidae). *Cladistics* **32**(2):113–140.
- Pillai RS. 1977.** On two frogs of the family Microhylidae from Andamans including a new species. *Proceedings of the Indian Academy of Sciences. Section B* **86**: 135–138.
- Poyarkov NA, Gorin VA, Zaw T, Kretova VD, Gogoleva SI, Pawangkhanant P, Che J. 2019.** On the road to Mandalay: contribution to the *Microhyla* Tschudi, 1838 (Amphibia: Anura: Microhylidae) fauna of Myanmar with description of two new species. *Zoological Research* **40**(4):244–276 DOI 10.24272/j.issn.2095-8137.2019.044.
- Poyarkov NA, Nguyen TV, Duong TV, Gorin VA, Yang JH. 2018.** A new limestone-dwelling species of *Micryletta* (Amphibia: Anura: Microhylidae) from northern Vietnam. *PeerJ* **6**:e5771 DOI 10.7717/peerj.5771
- Poyarkov NA, Vassilieva AB, Orlov NL, Galoyan EA, Tran DTA, Le DTT, Kretova VD, Geissler P. 2014.** Taxonomy and distribution of narrow-mouth frogs of the genus *Microhyla* Tschudi, 1838 (Anura: Microhylidae) from Vietnam with descriptions of five new species. *Russian Journal of Herpetology* **21**:89–148.
- Sano N, Kurabayashi A, Fujii T, Yonekawa H, Sumida M. 2005.** Complete nucleotide sequence of the mitochondrial genome of Schlegel's tree frog *Rhacophorus schlegelii* (family Rhacophoridae): duplicated control regions and gene rearrangements. *Genes & genetic systems* **80**(3): 213–224.
- Seshadri KS, Singal R, Priti H, Ravikanth G, Vidisha MK, Saurabh S, Pratik M, Gururaja KV. 2016.** *Microhyla laterite* sp. nov., a new species of *Microhyla* Tschudi, 1838 (Amphibia: Anura: Microhylidae) from a laterite rock formation in South West India. *PloS one* **11**(3):e0149727.
- Stattersfield AJ, Crosby MJ, Long AJ, Wege DC. 1998.** *Endemic bird areas of the world: priorities for biodiversity conservation*. Cambridge, UK: BirdLife International, 846 pp.
- Sterling EJ, Hurley MM, Le DM. 2006.** *Vietnam: a natural history*. New Haven, CT: Yale University Press, 448 pp.
- Tominaga A, Matsui M, Shimoji N, Khonsue W, Wu CS, Toda M, Eto K, Nishikawa K, Ota H. 2019.** Relict distribution of *Microhyla* (Amphibia: Microhylidae) in the Ryukyu Archipelago: High diversity in East Asia maintained by insularization. *Zoologica Scripta* **48**(4):440–453.

- Van der Meijden A, Vences M, Hoegg S, Boistel R, Channing A, Meyer A. 2007.** Nuclear gene phylogeny of narrow-mouthed toads (Family: Microhylidae) and a discussion of competing hypotheses concerning their biogeographical origins. *Molecular Phylogenetics and Evolution* **44**:1017–1030.
- Vences M, Vieites DR, Glaw F, Brinkmann H, Kosuch J, Veith M, Meyer A. 2003.** Multiple overseas dispersal in amphibians. *Proceedings of the Royal Society of London Series B: Biological Sciences*. **270(1532)**:2435–2442.
- Vineeth KK, Radhakrishna UK, Godwin RD, Anwasha S, Rajashekhar KP, Aravind NA. 2018.** A new species of *Microhyla* Tschudi, 1838 (Anura: Microhylidae) from West Coast of India: an integrative taxonomic approach. *Zootaxa* **4420**:151–179.
- Voris HK. 2000.** Maps of Pleistocene sea levels in Southeast Asia: shorelines, river systems and time durations. *Journal of Biogeography* **27**:1153–1167.
- Wijayathilaka N, Garg S, Senevirathne G, Karunarathna N, Biju SD, Meegaskumbura M. 2016.** A new species of *Microhyla* (Anura: Microhylidae) from Sri Lanka: an integrative taxonomic approach. *Zootaxa* **4066(3)**: 331–342.
- Woodruff DS. 2010.** Biogeography and conservation in Southeast Asia: how 2.7 million years of repeated environmental fluctuations affect today's patterns and the future of the remaining refugial-phase biodiversity. *Biodiversity and Conservation* **19(4)**:919–941.
- Wu X, Li Y, Zhang H, Yan L, Wu XB. 2016.** The complete mitochondrial genome of *Microhyla pulchra* (Amphibia, Anura, Microhylidae). *Mitochondrial DNA Part A* **27(1)**: 40–41.
- Yong HS, Song SL, Lim PE, Eamsobhana P, Tan J. 2016.** Complete mitochondrial genome and phylogeny of *Microhyla butleri* (Amphibia: Anura: Microhylidae). *Biochemical Systematics and Ecology* **66**:243–253.
- Zhang M, Fei L, Ye C, Wang Y, Wang B, Jiang J. 2018.** A New Species of Genus *Microhyla* (Amphibia: Anura: Microhylidae) from Zhejiang Province, China. *Asian Herpetological Research* **9(3)**: 135–148D.
- Zhang P, Zhou H, Chen YQ, Liu YF, Qu LH. 2005.** Mitogenomic perspectives on the origin and phylogeny of living amphibians. *Systematic Biology* **54(3)**: 391–400.
- Zhao EM, Adler K. 1993.** *Herpetology of China*. Contributions to herpetology number 10. St. Louis: Society for the Study of Amphibians and Reptiles, 522 pp.
- Zhao Y, Meng H, Su L. 2018.** The complete mitochondrial genome of the mixtured pygmy frog *Microhyla mixtura* (Anura, Microhylidae). *Conservation Genetics Resources* **10(3)**: 427–430.
