# Supplementary material for: A little frog leaps a long way: compounded colonizations of the Indian Subcontinent discovered in the tiny Oriental frog genus Microhyla (Amphibia: Microhylidae)
Source: PubMed Central journal article supplement (PMC7337035; doi:10.7717/peerj.9411), 2020-07-03
Supplement: peerj-08-9411-s018.pdf [file peerj-08-9411-s018.pdf]

**Supplemental File 3. Raw data file - aligned newly generated mtDNA sequences (12S rRNA – 16S rRNA fragment) (see Supplemental Table S1 for sequence details).**

>M. nepenthicola MN534658, MN534450, MN534551

TTATTATCATCTACCTCTCAACTTACACATGCAAGTATCAGCACACCTGTGAGAACGCC  
TTAATTCTT-TATAGAACAAGGAGCTGGTATCAGGCACAG---ATT-----TCTAGCCC  
ATAACACCTAGCTTTGCCACACCCTCAAGGGTATTTCAGCAGTGATTAACATTGTTTATAA  
GCGCCAGCTTGACTCAGTTAGAGAACCC--AGAGCCGGCCAATACGGTGCCAGCCGCCGC  
GGCTACACCGCTAGGCTCAAGTTGATATT-ATTCGGCGTTAAGCGTGTTTAAAGTACTT-  
-CAT-GATTAGAATTAACCTTAAACCAAGTTGTGACACACTTGTTTTTAAGAAAAACATA  
CACGAAAGTTATTCTAACCTAGCCACTTGAACCCACGACAGCTAGGACACAACTGGGAT  
TAGGTACCCCACTATGCCTAGCCGTAAAACATTTATTTACACCT-TAAACCGCCCGGGAA  
TTACGAGCCCAAGCTTAAAACCCAAAGGACTTGACGGTGTCCCACCCACCTAGAGGAGCC  
TGTTCTATAA-TCGATTCTCCCC-GATATACCTCACCCTTTTAGCCTC--TCAGCCTGT  
ATACCTCCGTCGTAAGCTTACCATATGAACGTT--TTTAGTGAGCTAAAAGAT-CATCAC  
ATAAATACGTCAGGTCAAGGTGCAGCCAACAAAGTGGTAAGTAATGGGCTACAATTTCTA  
CAGC--TAGAACACA-CGAAAGACTACATGCAA-CCCAGTCATGAAGGCGGATTTAGAAG  
TAAAAGAAAATAGAGAGTTCTTTTTAATTAGGCGCTGGGACGCGTACACACCGCCCGTC  
ACCCTCTTCAAACGCTCCT-ATTTAG-TTCATAACAAT-TTTATGCACTACAGAAGAGGT  
AAGTCGTAACACGGTAAGTGTACTGGAAAGTGCCTTGGATAAA-CAAATGTAGCTTAA  
CTAAA-GCATCTCGCTTACACCGAGAATATATCAGTGCAACCCAGATCATTTTGA--GCC  
CAAACTTAGCTTAT--CCCCCCT-AATATTAACC--TAACTGTTTAACAAA---TCAA  
TAAAACATTTTATAC-ATTTAGTAAAGGCGATAAAAAAATGTCTG-AAAGCTATAAAA-T  
TAGTACCGCAAGGGAACAGTGAAATATTAATGAAACAA-CTTCAAGCACATAAAAGCAGA  
GCTGTAACCTCGTACCTTTTGCATCATGGTCTAACTAGTCTAATCAAGCAAAACGAACTT  
TAAGTTTGACCCCCGAACTAGGTGAGCTACTTAAAAACAGCCTTCT-GAGCAAACCCG  
TCTCTGTTGCAAAAGAGTGGGAAGATTTT-TAAGTAGAGGTGACAGACCTACCGAACCTA  
GAGATAGCTGGTTATTCAGGAAAAGGATTTAAGTCTACCTTAGGTTTTCT-ATACA-AC  
A-CAATATTTCTTA-AACCTTAAGAGCTATTCAAATAAGGTACAGCCTATTTGAAACAGG  
ATACAACCTAACC-----  
-----AAAAAGCGTTAAAGCTTCATTATTTTTTTATTCTAAAAA-TTTCACAA-CC

TCTTTCTAACCCAT-AAATT-ATACTGAATGATCTCATAACCATATGAAAGCCTATATGT  
TAGAACTAGTAACAAGAAGACAACCCTTCTCCA-AAATGTAAGCATAAGCCAAAATGAAC  
AATTCATTGGCACTTAAAGTTAATAAATCACCAGTAGCAACTCA----ACAAGAAAACCTC  
TAC-----TAAGTGC-AACGTCAACCTTACACTAGTACATTTCTGGA  
AAGATTAAGAATGGGAAGGAACCTCGGCAAATA-TTAACCCCGCCTGTTTACCAAAAA  
CATCGCCTCTTGCCACCC----ATAAGAGGTCCAGCCTGCCAGTGACCAA--GTAAAC  
GGCCGCGGTACCCTAACCGTGCAAAGGTAGCGCAATCACTTGTTCTTTAAATGAGGACTA  
GTATGAACGGCATCACGAGGGTTATGCTGTCTCCCACTCTATTTCAGTGAAACTGATCTC  
CCCGTGAAGAAGCGGGATAAAAATATAAGACGAGAAGACCCCATGGAGCTTTAAACTCA  
GTATCAACTGCTTTACA-AATTAACCTAACATTTAT-GCAA-CTCTGAT-TACTAGTTTT  
CGGTTGGGGTGACCACGGAGTATAAAACAACCTCCACGACGAAAGGAAATAACAACCTAA  
ATCAAGAGTTACAACCTCTAAATATCAAC-----AAATTGACTAAA-TTGATCCAATA  
AATT--GATCAACGAACCAAGTTACCCTGGGGATAACAGCGCAATCCATTTCAAGAGCTC  
ATATCGACAAATGGGTTTACG-ACC-TCGATGTTGGATCAGGGTACCCAGTG-GCGCAG  
CCGCTA-CTAA-CGGTTC

>M. nepenthicola MN534659, MN534451, MN534552

TTATTATCATCTACCTCTCAACTTACACATGCAAGTATCAGCACACCTGTGAGAACGCC  
TTAATTCTT-TATAGAACAAGGAGCTGGTATCAGGCACAG---ATT-----TCTAGCCC  
ATAACACCTAGCTTTGCCACACCCTCAAGGGTATTTCAGCAGTGATTAACATTGTTTATAA  
GCGCCAGCTTGACTCAGTTAGAGAACCC--AGAGCCGGCCAATACGGTGCCAGCCGCCGC  
GGCTACACCGCTAGGCTCAAGTTGATATT-ATTCGGCGTTAAGCGTGTTTAAAGTACTT-  
-CAT-GATTAGAATTAAACTTAAACCAAGTTGTGACACACTTGTTTTTAAGAAAAACATA  
CACGAAAGTTATTCTAACCTAGCCACTTGAACCCACGACAGCTAGGACACAACTGGGAT  
TAGGTACCCCACTATGCCTAGCCGTAAACATTTATTTACACCT-TAAACCGCCCGGGAA  
TTACGAGCCCAAGCTTAAACCCAAAGGACTTGACGGTGTCCACCCACCTAGAGGAGCC  
TGTTCTATAA-TCGATTCTCCC-GATATACCTCACCCTTTTAGCCTC--TCAGCCTGT  
ATACCTCCGTGTAAGCTTACCATATGAACGTT--TTAGTGAGCTAAAAGAT-CATCAC  
ATAAATACGTCAGGTCAAGGTGCAGCCAACAAAGTGGTAAGTAATGGGCTACAATTTCTA  
CAGC--TAGAACACA-CGAAAGACTACATGCAA-CCCAGTCATGAAGGCGGATTTAGAAG  
TAAAAAGAAAATAGAGAGTTCTTTTTAATTAGGCGCTGGGACGCGTACACACCGCCCGTC

ACCCTCTTCAAACGCTCCT-ATTTAG-TTCATAACAAT-TTTATGCACTACAGAAGAGGT  
AAGTCGTAACACGGTAAGTGTACTGGAAAAGTGCCTTGGATAAA-CAAATGTAGCTTAA  
CTAAA-GCATCTCGCTTACACCGAGAATATATCAGTGCAACCCAGATCATTTTTGA--GCC  
CAAACCTTAGCTTAT--CCCCCCT-AATATTAACC--TAACTGTTTAACAAA---TCAA  
TAAACATTTTATAC-ATTTAGTAAAGGCGATAAAAAAATGTCTG-AAAGCTATAAAA-T  
TAGTACCGCAAGGGAACAGTGAAATATTAATGAAACAA-CTTCAAGCACATAAAAAGCAGA  
GCTGTAACCTCGTACCTTTTGCATCATGGTCTAACTAGTCTAATCAAGCAAACGAACTT  
TAAGTTTGACCCCCGAAACTAGGTGAGCTACTTAAAAACAGCCTTCT-GAGCAAACCCG  
TCTCTGTTGCAAAGAGTGGGAAGATTTT-TAAGTAGAGGTGACAGACCTACCGAACCTA  
GAGATAGCTGGTTATTCAGGAAAAGGATTTAAGTCCTACCTTAGGTTTCT-ATACA-AC  
A-CAATATTTCTTA-AACCTTAAGAGCTATTCAAATAAGGTACAGCCTATTTGAAACAGG  
ATACAACCTAACCC-----  
-----AAAAAGCGTTAAAGCTTCATTATTTTTTTATTCTAAAAA-TTTCACAA-CC  
TCTTTCTAACCCAT-AAATT-ATACTGAATGATCTCATAACCATATGAGAGCCTATATGT  
TAGAACTAGTAACAAGAAGACAACCCTTCTCCA-AAATGTAAGCATAAGCCAAAATGAAC  
AATTCATTGGCACTTAAAGTTAATAAATCACCAGTAGCAACTCA---ACAAGAAAATC  
TAC-----TAACTGC-AACGTCAACCTTACACTAGTACATTTCTGGA  
AAGATTAAGAATGGGAAGGAACTCGGCAAATA-TTAACCCCGCCTGTTTACCAAAAA  
CATCGCCTCTTGCCACCC---ATAAGAGGTCCAGCCTGCCAGTGACCAA--GTTAAAC  
GGCCGCGGTACCCTAACCGTGCAAAGGTAGCGCAATCACTTGTTCTTTAAATGAGGACTA  
GTATGAACGGCATCACGAGGGTTATGCTGTCTCCCACTCTATTTCAGTGAAACTGATCTC  
CCCGTGAAGAAGCGGGGATAAAAAATATAAGACGAGAAGACCCCATGGAGCTTTAAACTCA  
GTATCAACTGCTTTACA-AATTAACCTAACATTTAT-GCAA-CTCTGAT-TACTAGTTTT  
CGGTTGGGGTGACCACGGAGTATAAAACAACCTCCACGACGAAAGGAAGTAACAACCTAA  
ATCAAGAGTTACAACCTCTAAATATCAAC-----AAATTGACTAAA-TTGATCCAATA  
AATT--GATCAACGAACCAAGTTACCCTGGGGATAACAGCGCAATCCATTTCAAGAGCTC  
ATATCGACAAATGGGTTTACG-ACC-TCGATGTTGGATCAGGGTACCCAGTG-GCGCAG  
CCGCTA-CTAA-CGGTTC

>M. borneensis MN534550, MN534657

-----



AAGATTAAAAGAATGGGAAGGAACTCGGCAAACCA-TTAACCCCGCCTGTTTACCAAAAA  
CATCGCCTCTTGCCACCC----ATAAGAGGTCCAGCCTGCCAGTGACCAA--GTTAAAC  
GGCCGCGGTACCCTAACCGTGCAAAGGTAGCGCAATCACTTGTTCCTTTAAATAAGGACTA  
GTATGAACGGCATCACGAGGGTTATGCTGTCTCCCCACTCTATTCAGTGAAACTGATCTC  
CCCGTGAAGAACCGGGGATAAGGATATAAGACGAGAAGACCCCATGGAGCTTTAAACTCA  
GTATCAACTGCTTTATA-AATTAACCTAACATTTAT-GCAA-CTCTGAC-TACTAGTTTT  
CGGTTGGGGTGACCCCGGAGTTTAAACAACCTCCCCGACCAAAGGAATTAAC-----  
-----  
-----  
-----  
-----

>Microhyla sp. 1 MN534660, MN534452, MN534553

TTATTATCATCTACCTCTCAACTTACACATGCAAGTTTCAGCACACCTGTGAGAACGCC  
TTAATTCTT-TATAGAACAAGGAGCTGGTATCAGGCACAG---ACC-----TCTAGCCC  
ATAACACCTAGCTTTGCCACGCCCTCAAGGGTATTCAGCAGTGATTAACATTGTCTATAA  
GCGCCAGCTTGACTCAGTTAGAGAGCCC--AGAGCCGGCTAATACGGTGCCAGCCGCCGC  
GGCTACACCGCTAGGCTCAAGTTGATATT-ATTCGGCGTTAAGCGTGTTTAAAGTACTC-  
-CAT-GATTAGAATTAAACTTAAACCAAGTTGTGACACACTTGTTTTTAAGAAAATCATA  
CACGAAAGTTATTCTAACCCAACCACTTGAACCCACGACAGCTAAGACACAAACTGGGAT  
TAGGTACCCCACTATGCCTAGCCGTAAAAATTTATTTACACCT-TAAACCGCCCGGGAA  
TTACGAGCCCAAGCTTAAACCCAAAGGACTTGACGGTGTCCCACCCACCTAGAGGAGCC  
TGTTCTATAA-TCGATTCTCCCCGATATACCTCACCCTTTTAGCCTC--TCAGCCTGT  
ATACCTCCGTCGTAAGCTTACCATATGAACGTT--TTTAGTGAGCTAAAAGAT-CACCAC  
ATAAATACGTCAGGTCAAGGTGCAGCCAACGAAGTGGCAAGTAATGGGCTACAATTTCTA  
TGTC--TAGAACAAA-CGAAAGACTACATGCAA-CTCAGTCATGAAGGCGGATTTAGAAG  
TAAAAAGAAAATAGAGAGTTCTTTTTAATTAGGCGCTGGGACGCGTACACACCGCCCGTC  
ACCCTCTTCAAACGCTCCA-ATTTAG-TTCATAACAAC-C TTATGCACTACAGAAGAGGT  
AAGTCGTAACACGGTAAGCGTACTGGAAAGTGCCTTGGATAAA-CAAATGTAGCTTAA  
CCAAA-GCATCTCGCTTACACCGAGAACATGTCAGTGAAACCCAGATCATTTTGA--GCC  
CAAACTTAGCTTAA---CCCTTCTTAATATCAACC--TAACTATAACAACAAA---TTAA

TAAAACATTTTACAC-ATTTAGTAAAGGCGATAAAAAAATGTCTA-AAAGCTATAAAA-C  
TAGTACCGCAAGGGAACAGTCAAATACTAATGAAATAA-TTCAAGCACATAAAAGCAGA  
GCTGTAACCTCGTACCTTTTGCATCATGGTCTAACTAGTCCAATCAAGCAAAACGAACTT  
TAAGTTTGACCCCCGAAACTAGGTGAGCTACTTAAAAACAGCCTTTT-GAGCCAACCCG  
TCTCTGTTGCAAAAGAGTGGGAAGATTTT-TAAGTAGAGGTGACAAACCTACCGAACCTA  
GAGATAGCTGGTTATTCAGGAGAAGGATTTAAGTCTACCTTAGGTTCTTT-GTACA-AT  
A-CAATATTTCTTA-AACCTTAAGAGCTATTCAAATAAGGTACAGCCTATT-GAAACAGG  
ATACAACCTAACC-----  
-----TTCACAA-CC  
TTTTTTCAACCCAT-AAACC-GTACTGAATGATCTCATAACTATATGAGAGCCTATATGT  
TAGAACTAGTAACAAGAAGACAATTCTTCTCCA-AAATGTAAGCATAAGCCAAAACGAAC  
AATTCATTGGCACTTAAAGTTAATAAACCATCAGTAGCAACTCA----TCAAGAAAAACC  
TAC-----TATCTGA-AACGTCAACCTTACACTAGTACATTACTGGA  
AAGATTAAGAATGGGAAGGAACCTCGGCAAACCA-TTAACCCCGCCTGTTTACCAAAAA  
CATCGCCTCTTGCCACCC----ATAAGAGGTCCAGCCTGCCAGTGACCAA--GTAAAC  
GGCCGCGGTACCCTAACCGTGCAAAGGTAGCGCAATCACTTGTTCTTTAAATAAGGACTA  
GTATGAATGGCATCACGAGGGTTATGCTGTCTCCCCACTTTATTTCAGTGAAACTGATCTC  
CCCGTGAAGAAGCGGGAATAAAAAATATAAGACGAGAAGACCCCATGGAGCTTTAAACTCA  
GTATCAACTGCTCCATA-AATCAACTTAACATTTAT-GCAA-CTCTGAC-TACTAGTTTT  
CGGTTGGGGTGACCACGGAGTATAAAACAACCTCCACGACGAAAGGAAATAATAACCTAA  
ATCAAGAGCTACAACCTCTAAATATCAAC-----AAATTGACTAAA-TTGATCCAATA  
AATT--GATCAACGAACCAAGTTACCCTGGGGATAACAGCGCAATCCATTTCAAGAGCTC  
ATATCGACAAAATGGGTTTACG-ACC-TCGATGTTGGATCAGGGTATCCCAGTG-GCGCAG  
CCGCTA-CTAA-CGGTTC

>M. malang MN534661, MN534453, MN534554

TTATTATCACCTACCTCTCAACTTACACATGCAAGTATCAGCACACCTGTGAGAACGCC  
TTAATTCTT-TATAGAACAAGGAGCTGGTATCAGGCACAG---ACCC-----CCTAGCCC  
ATGACACCTAGCTTTGCCACACCCTCAAGGGTATTTCAGCAGTGATTAACATTGTTTCATAA  
GCGCCAGCTTGACTCAGTTAGAGAGCCC--AGAGCCGGCTAATACGGTGCCAGCCGCCGC  
GGCTACACCGCTAGGCTCAAGTTGATATT-ATTCGGCGTTAAGCGTGTTTAAAGTACTA-

TCAC-GATTAGAATTGAACTTAAACCAAGTTGTGACACACTTGTTCTTAAGAAAAACATA  
AACGAAAGTTATTCTAACATAACCACTTGAACCCACGACAGCTAAGAAACAACTGGGAT  
TAGGTACCCCACTATGCTTAGCCGTAAAACATTTATTTACACCT-TAAACCGCCCGGAA  
TTACGAGCCCAAGCTTAAACCCAAAGGACTTGACGGTGTCCCACCCACCTAGAGGAGCC  
TGTTCTATAA-TCGATTCTCCCC-GATACACCTCTCCACTTCTAGCCTC--TCAGCCTGT  
ATACCTCCGTCGTAAGCTTACCATATGAACGTT-TTCTAGTGAGCTAAAAGAT-TACCAC  
ATAAATACGTCAGGTCAAGGTGCAGCCCACGAAGTGGCAAGTAATGGGCTACAATTTCTA  
TAAC--TAGAACACA-CGAAAGACTACATGCAA-CCCAGTCATGAAGGCGGATTTAGAAG  
TAAAAAGAAAATAGAGAGTTCTTTTTAATTAGGCGCTGGGACGCGTACACACCGCCCGTC  
ACCCTCTTCAAACGCTCAA-AATTAG-TTCATAACAAC-CCTATGCACTACAGAAGAGGT  
AAGTCGTAACACGGTAAGCGTACTGGAAAGTGCCTTGGATAAA-CAAATGTAGCTTAA  
CTAAA-GCATCTCGCTTACACCGAGAACATGTCAGTGAAACCCGGATCATTTTGA--GCC  
AAAACTTAGCTTAACCCCTCTTCTTAATGTACACA--CAACCATTTAACAAA--TTAA  
TAAACATTTTACAC-ATTTAGTAAAGGCGATAAAAAAATGTCTA-AGAGCTATAAAA-C  
TAGTACCGCAAGGGAATAGTGAAATATTAATGAAAAA--CTCCAAGCACACAAAAGCAGA  
GCTTTAACCTCGTACCTTTTGCATCATGGTCTAACTAGTCTAATCAAGCAAAACGAATTT  
TAAGTTTGACCCCCGAAACTAGGTGAGCTACTTAAAAACAGCCTTAT-GGGCCAACCCG  
TCTCTGTTGCAAAAGAGTGGAAGATTTTTTAAGTAGAGGTGACAAACCTACCGAACCTA  
GAGATAGCTGGTTATTCAGGAAAAGGATTTAAGTCTACCTTAGGTTATTC-GTATA-TT  
A-TAA-----  
-----AAAGCAG  
CCACCTTCCAAAAAGCGTTAAAGCTTTATTA---TTCTATCCCAAAA-TTCCACTA-CC  
ATTTATTAACCCTT-AAACC-GTACTGAATGATCTCATAACCTTATGAGAGCCTATATGT  
TAGAACTAGTAACAAGAAGACAGCCCTTCTCCA-AAATGTAAACATGAACCAAAACGAAC  
CACTCATTGGCACTTAAAGTTAATAAATCAATAGTAGAAACCTA----ACAAGAAAAGTC  
TAC-----TAAATAC-AACGTCAACCTTACACTAGTACATTACTGGA  
AAGAATAAAAGAATGGGAAGGAACTCGGCAAACCA-CTAACCCCGCCTGTTTACCAAAAA  
CATCGCCTCTTGACACCC----ATAAGAGGTCCAGCCTGCCAGTGACTAA--GTAAAC  
GGCCGCGGTACCCTAACCGTGCAAAGGTAGCGCAATCACTTGTTCTTTAAATGAGGACTA  
GTATGAACGGCATCACGAGGGTTATGCTGTCTCCCCACTCTATTTCAGTGAAACTGATCTC

CCCGTGAAGAAGCGGGGATAAAAATATAAGACGAGAAGACCCCATGGAGCTTTAAACTCA  
GTATCAACTGCTTTATA-AATCAACCTAATATCTAT-GCAA-CCCTGAT-TACTAGTTTT  
CGGTTGGGGTGACCACGGAGCATAAAACAACCTCCACGACGAAAGGAAGTAATAACCTAA  
ATTAAGAGTTACAACCTCTAAATATCAAC-----AAATTGACTAAA-TTGATCCAATA  
AATT--GATCAACGAACCAAGTTACCCTGGGGATAACAGCGCAATCCATTTCAAGAGCTC  
ATATCGACAAATGGGTTTACG-ACC-TCGATGTTGGATCAGGGTATCCCAGTG-GCGCAG  
CCGCTA-CTAA-CGGTTC

>M. malang MN534662, MN534454, MN534555

TTATTATCACCTACCTCTCAACTTACACATGCAAGTATCAGCACACCTGTGAGAACGCC  
TTAATTCTT-TATAGAACAAGGAGCTGGTATCAGGCACAG---ACCC-----CCTAGCCC  
ATGACACCTAGCTTTGCCACACCCTCAAGGGTATTCAGCAGTGATTAACATTGTTTCATAA  
GCGCCAGCTTGACTCAGTTAGAGAGCCC--AGAGCCGGCTAATACGGTGCCAGCCGCCGC  
GGCTACACCGCTAGGCTCAAGTTGATATT-ATTCGGCGTTAAGCGTGTTTAAAGTACTA-  
TCAC-GATTAGAATTGAACTTAAACCAAGTTGTGACACACTTGTTCCTTAAGAAAAACATA  
AACGAAAGTTATTCTAACATAACCACTTGAACCCACGACAGCTAAGAAACAACTGGGAT  
TAGGTACTCCCCTATGCTTAACCGTAAACATTTATTTACACCT-TAAACCGCCCGGGAA  
TTACGAGCCCAAGCTTAAACCCAAAGGACTTGACGGTGTCCCACCCACCTAGAGGAGCC  
TGTTCTATAA-TCGATTCTCCCC-GATACACCTCTCCACTTCTAGCCTC--TCAGCCTGT  
ATACCTCCGTCGTAAGCTTACCATATGAACGTT-TTCTAGTGAGCTAAAAGAT-TACCAC  
ATAAATACGTCAGGTCAAGGTGCAGCCCACGAAGTGGCAAGTAATGGGCTACAATTTCTA  
TAAC--TAGAACACA-CGAAAGACTACATGCAA-CCCAGTCATGAAGGCGGATTTAGAAG  
TAAAAGAAAAATAGAGAGTTCTTTTTAATTAGGCGCTGGGACGCGTACACACCGCCCGTC  
ACCCTCTTCAAACGCTCAA-AATTAG-TTCATAACAAC-CCTATGCACTACAGAAGAGGT  
AAGTCGTAACACGGTAAGCGTACTGGAAAGTGCGCTTGGATAAA-CAAATGTAGCTTAA  
CTAAA-GCATCTCGCTTACACCGAGAACATGTCAGTGAAACCCGGATCATTTTGA--GCC  
AAAACTTAGCTTAACCCCTCTTCTTAATGTACACA--CAACCATTTAACAAA---TTAA  
TAAAACATTTTACAC-ATTTAGTAAAGGCGATAAAAAAATGTCTA-AGAGCTATAAAA-C  
TAGTACCGCAAGGGAATAGTGAAATATTAATGAAAA--CTCCAAGCACACAAAAGCAGA  
GCTTTAACCTCGTACCTTTTGCATCATGGTCTAACTAGTCTAATCAAGCAAACGAATTT  
TAAGTTTGACCCCCGAACTAGGTGAGCTACTTAAAAACAGCCTTAT-GGGCCAACCCG



TCTCTGTTGCAAAAGAGTGGGAAGATTTTTTAAAGTAGAGGTGACAAACCTACCGAACCTA  
GAGATAGCTGGTTATTCAGGAAAAGGATTTAAGTCCTACCTTAGGTTATTC-GTATA-TT  
A-TAA-----  
-----AAAGCAG  
CCACCTTCC-AAAAAGCGTTAAAGCTTTATTA--TTCTATCTCAAAA-TTCCACTA-CC  
ATTTATTAACCCTT-AAACC-GTACTGAATGATCTCATAACCTTATGAGAGCCTATATGT  
TAGAACTAGTAACAAGAAGACAGCCCTTCTCCA-AAATGTAAACATGAACCAAAACGAAC  
CACTCATTGGCACTTAAAGTTAATAAATCAATAGTAGAAACCTA----ACAAGAAAAGTC  
TAC-----TAAATAC-AACGTCAACCTTACACTAGTACATTACTGGA  
AAGAATAAAAGAATGGGAAGGAACCTCGGCAAACCA-CTAACCCCGCCTGTTTACCAAAAA  
CATCGCCTCTTGACACCC----ATAAGAGGTCCAGCCTGCCAGTGACTAA--GTAAAC  
GGCCGCGGTACCCTAACCGTGCAAAGGTAGCGCAATCACTTGTTCTTTAAATGAGGACTA  
GTATGAACGGCATCACGAGGGTTATGCTGTCTCCCCACTCTATTCAGTGAAACTGATCTC  
CCCGTGAAGAAGCGGGGATAAAAATATAAGACGAGAAGACCCCATGGAGCTTTAAACTCA  
GTATCAACTGCTTTATA-AATCAACCTAATATCTAT-GCAA-CCCTGAT-TACTAGTTTT  
CGGTTGGGGTGACCACGGAGCATAAAATAACCTCCACGACGAAAGGAAGTAATAACCTAA  
ATTAAGAGTTACAACCTCTAAATATCAAC-----AAATTGACTAAA-TTGATCCAATA  
AATT--GATCAACGAACCAAGTTACCCTGGGGATAACAGCGCAATCCATTTCAAGAGCTC  
ATATCGACAAAATGGGTTTACG-ACC-TCGATGTTGGATCAGGGTATCCCAGTG-GCGCAG  
CCGCTA-CTAA-CGGTTC

>M. orientalis MN534663, MN534455, MN534556

TTATTATCATCTACTTCTCAACTTACACATGCAAGTATCAGCACACCCGTGAGAACGCC  
TTTCCTCTT-CATAGAATAAGGAGCTGGTATCAGGCACAG---ACC-----TCTAGCCC  
ATGACACCTAGTTTTGCCACACCCTCAAGGGTATTCAGCAGTGATTAACATTGTTTTATAA  
GCGCCAGCTTGACTCAGTTAGAGAACCC--AGGGCCGGCAAATACGGTGCCAGCCGCCGC  
GGCTACACCGCTAGGCTCAAGTTGATATT-ATTCGGCGTTAAGCGTGTTTAAAGTGTCT-  
ACAA-GATTAGAATTGAACTTAAACCAAGTTGTGACACACTTGTTTTTAAGAAAAACGCT  
TACGAAAGTTATTCTAACATAACCACTTGAACCCACGACAGCTAGGACACAAACTGGGAT  
TAGGTACCCCACTATGCCTAGCCGTAAAATATTTATTTACACCT-TTAACCGCCCGGGAA  
TTACGAGCCCAAGCTTAAAACCCAAAGGACTTGACGGTGTCCCACCCACCTAGAGGAGCC

TGTTCTATAA-TCGATTCCCCCGATATACCTCACCACCTTTTAGCCTC--TCAGCCTGT  
ATACCTCCGTCGTAAGCTTACCATATGAATGCA-TTTTAGTGAGCTAAAAGAT-TCTTAC  
ATAAACACGTCAGGTCAAGGTGCAGCCCACGAAGTGGAAAGCAATGGGCTACAATTTCTA  
TAAC--TAGAACATA-CGAAAGACTACATGCAA-CCTAGTCATGAAGGCGGATTTAGCAG  
TAAAAAGAACTAGAGAGTTCTTTTTAATTAGGCACTGGGACGCGTACACACCGCCCGTC  
ACCCTCTTCAAATGCCCA-ATTCAG-TTTATAACAAC-TCTATGCACTACAGAAGAGGT  
AAGTCGTAACACGGTAAGCGTACTGGAAAGTGCCTTGGATAAA-CAAATGTAACCTAA  
TTAAA-GTACCTTGTTTACACCAAGATTATGTCTGTGAAGCCAGATCATTTTGA--GCT  
AAAACTTAGCTTTAACTTCTTTAT-AATACTCAAC--ATACCTCTTAATAAA---CCAA  
TAAAACATTTTCTAT-GTTTAGTAAAGGCGATCAAAAAATACCTA-AAAGCTATAAAA-T  
TAGTACCGCAAGGGAACAGTGAAATATTAATGAAAA--CCTCAAGCACACAAAAGCAGA  
GTTATAATCTTGTACCTTTTGCATCATGGTCTAACTAGTCTAATCAAGCAAAAAGAACTT  
TAAGTCTGACCCCCGAACTAGGTGAGCTACTTAGAAACAGCCTCAT-GGGCCAACCCG  
TCTCTGTTGCAAAAGAGTGGGAAGATTTT-TAAGTAGAGGTGATAAACCTACCGAACCTA  
GAGATAGCTGGTTATTCAGGAAAAGGATTTAAGTCCTACCTTAGGTTTTTC-GTATT-AT  
A-TAATACCCCCT-AACCTTAAGAGCTATTCAAATAAGGTACAGCCTATTTGAAATAGG  
ATACAACCTCAC-----  
-----TATTA---TTTCTTCTACAA--TTCCACCA-CC  
ATATTTTAACCCCT-AAATA-GTACTGAATGATTCCATAACTTTATGGAAGCCTATATGT  
TAGAACTAGTAACAAGAAGGCAGCCCTTCTCCA-AAATGTAAGCATGAGCCAAAATGAAC  
TATTCATTGGCACTTAAAGCTAATAAACCACTAGTAGCAACTCA---ATCAAGAAAAACC  
TAC-----TAATAAT-ATCGTCAACCTTACACTAGCACATTTCTGGA  
AAGATTAAGACTGGGAAGGAACCTCGGCAACTACTTAACCCCGCCTGTTTACCAAAAA  
CATCGCCTCTTGTTTTTATATTATAAGAGGTCCAGCCTGCCAGTGACAAA--GTTAAAC  
GGCCGCGGTACCCTAACCGTGCAAAGGTAGCACAATCACTTGTTCTTTAAATGAGGACTA  
GTATGAACGGCATCACGAGGGTTATGCTGTCTCCCATTCTATTAGTAACTGATCTC  
TCCGTGAAGAAGCGGAGATAAAAATATAAGACGAGAAGACCCCATGGAGCTTTAACTCA  
AAATCAATTGCTTTAAACAATTAACCTAATATTTAT-GCAA-CCCTGAT-TTCTAGTTTT  
CGGTTGGGGTGACCACGGAGTACAAACAAACCTCCATGATGAAAGGAACCTAATAACCTAA  
ATCAAGAGCTACAGCTCTAAATATCAAC-----AACTGACTAAA-TTGATCCAATT

ACTT--GATCAACGAACCAAGTTACCCTGGGGATAACAGCGCAATCCATTTCAAGAGCTC  
ATATCGACAAATGGGTTTACG-ACC-TCGATGTTGGATCAGGGTATCCCAGTG-GCGCAG  
CCGCTA-CTAA-CGGTTC

>M. orientalis MN534664, MN534456, MN534557

TTATTATCATCTACTTCTCAACTTACACATGCAAGTATCAGCACACCCGTGAGAACGCC  
TTTCTCTT-CATAGAATAAGGAGCTGGTATCAGGCACAG---ACC-----TCTAGCCC  
ATGACACCTAGTTTTGCCACACCCTCAAGGGTATTCAGCAGTGATTAACATTGTTTTATAA  
GCGCCAGCTTGACTCAGTTAGAGAACCC--AGGGCCGGCAAATACGGTGCCAGCCGCCGC  
GGCTACACCGCTAGGCTCAAGTTGATATT-ATTCGGCGTTAAGCGTGTTTAAAGTGCCT-  
ACAA-GATTAGAATTGAACTTAAACCAAGTTGTGACACACTTGTTTTTAAGAAAAACGCT  
TACGAAAGTTATTCTAACATAACCACTTGAACCCACGACAGCTAGGACACAACTGGGAT  
TAGGTACCCCACTATGCCTAGCCGTAAAATATTTATTTACACCT-TTAACCGCCCGGAA  
TTACGAGCCCAAGCTTAAACCCAAAGGACTTGACGGTGTCCACCCACCTAGAGGAGCC  
TGTTCTATAA-TCGATTCCCCCGATATACCTCACCCTTTTAGCCTC--TCAGCCTGT  
ATACCTCCGTCGTAAGCTTACCATATGAATGCA-TTTTAGTGAGCTAAAAGAT-TCTTAC  
ATAAACACGTCAGGTCAAGGTGCAGCCACGAAGTGGAAGCAATGGGCTACAATTTCTA  
TAAC--TAGAACATA-CGAAAGACTACATGCAA-CCTAGTCATGAAGGCGGATTTAGCAG  
TAAAAGAACTAGAGAGTTCTTTTTAATTAGGCACTGGGACGCGTACACACCCGCCGTC  
ACCCTCTTCAAATGCCCA-ATTCAG-TTTATAACAAC-TCTATGCACTACAGAAGAGGT  
AAGTCGTAACACGGTAAGCGTACTGGAAAGTGCGCTTGGATAAA-CAAATGTAACCTAA  
TTAAA-GTACCTTGTTTACACCAAGATTATGTCTGTGAAGCCCAGATCATTTTGA--GCT  
AAAACTTAGCTTTAACTTCTTTAT-AATACTCAAC--ATACCTCTTAATAAA---CCAA  
TAAAACATTTTCTAT-GTTTAGTAAAGGCGATCAAAAAATACCTA-AAAGCTATAAAA-T  
TAGTACCGCAAGGGAACAGTGAAATATTAATGAAAA--CCTCAAGCACACAAAAGCAGA  
GTTATAATCTTGACCTTTTGCATCATGGTCTAACTAGTCTAATCAAGCAAAAAGAACTT  
TAAGTCTGACCCCCGAACTAGGTGAGCTACTTAGAAACAGCCTCAT-GGGCCAACCCG  
TCTCTGTTGCAAAAGAGTGGAAGATTTT-TAAGTAGAGGTGATAAACCTACCGAACCTA  
GAGATAGCTGGTTATTCAGGAAAAGGATTTAAGTCTACCTTAGGTTTTTC-GTATC-AT  
A-TAATACCCCCCT-AACCTTAAGAGCTATTCAAATAAGGTACAGCCTATTTGAAATAGG  
ATACAACCTCAC-----

-----TATTA---TTTCTTCTAAAAA-TTCCACCA-CC  
ATATTTTAACCCCT-AAATA-GTACTGAATGATTCCATAACTTTATGGAAGCCTATATGT  
TAGAACTAGTAACAAGAAGGCAGCCCTTCTCCA-AAATGTAAGCATGAGCCAAAATGAAC  
TATTCATTGGCACTTAAAGCTAATAAACCCTAGTAGCAACTCA---ATCAAGAAAAACC  
TAC-----TAATAAC-ATCGTCAACCTTACACTAGCACATTTCTGGA  
AAGATTAAGACTGGGAAGGAAGCTCGGCAAACCTACTTAACCCCGCCTGTTTACCAAAAA  
CATCGCCTCTTGTTTTTATATTATAAGAGGTCCAGCCTGCCAGTGACAAA--GTAAAC  
GGCCGCGGTACCCTAACCGTGCAAAGGTAGCACAATCACTTGTTCCTTAAATGAGGACTA  
GTATGAACGGCATCACGAGGGTTATGCTGTCTCCCCACTCTATTTCAGTGAAACTGATCTC  
TCCGTGAAGAAGCGGAGATAAAAATATAAGACGAGAAGACCCCATGGAGCTTTAAACTCA  
AAATCAATTGCTTTAAACAATTAACCTAATATTTAT-GCAA-CCCTGAT-TTCTAGTTTT  
CGGTTGGGGTGACCACGGAGTACAAACAAACCTCCATGATGAAAGGAACTAATAACCTAA  
ATCAAGAGCTACAGCTCTAAATATCAAC-----AACTGACTAAA-TTGATCCAATT  
ACTT--GATCAACGAACCAAGTTACCCTGGGGATAACAGCGCAATCCATTTCAAGAGCTC  
ATATCGACAAATGGGTTTACG-ACC-TCGATGTTGGATCAGGGTATCCCAGTG-GCGCAG  
CCGCTA-CTAA-CGGTTC

>M. mantheyi MN534665, MN534457, MN534558

TTATTATCATCTATTTCTCAACTTACACATGCAAGTATCAGCACACCCGTGAGAACGCC  
TTCCCCCTT-CATAGGACAAGGAGCCGGTATCAGGCACAG---TCT-----TCTAGCCC  
ATGACACCTAGCTTTGCCACACCCTCAAGGGTATTTCAGCAGTGATTAACATTGTTTCATAA  
GCGCCAGCTTGATTCAGTCAGAGAACCC--AGAGCCGGCTAATACGGTGCCAGCCGCCGC  
GGCTACACCGCTGGGCTCAAGTTGATACTATTTTCGGCGTTAAGCGTGTTTAAAGTGCTC-  
ACTA-AATTAGAATTGAACTTAAACCAAGTTGTGACATGCTTGTTTTTAAGAAAAACAAA  
CACGAAAGTTATTCTAAACTAACCCTTGAACCCACGACAGCTAAGACACAACTGGGAT  
TAGGTACCCCACTATGCTTAGCCGTAAAATATTTACTTACACCC-CAAACCGCCCGGGAA  
TTACGAGCCCAAGCTTAAACCCAAAGGACTTGACGGTGTCCCACCCACCTAGAGGAGCC  
TGTTCTATAA-TCGATTCCCCC-GATATACCTCACCACTTTTAGCCTT--TCAGCCTGT  
ATACCTCCGTGTAAGCTTACCATATGAACGCT-TTTTAGTGAGCTAAAAGAT-TTCTAC  
ATAAATACGTCAGGTCAAGGTGCAGCCACGAAGTGGCAAGTAATGGGCTACAATTTCTA  
CAAC--TAGAACACA-CGAAAGACTACATGCAA-CCTAGTCATGAAGGCGGATTTAGAAG

TAAAAAGAAAATAGAGAGTTCTTTTTAATTAGGCACTGGGACGCGTACACACCGCCCGTC  
ACCCTCTTCAAACGCTCCA-ACTTAG-TTCATAACAAC-TCTATGCACAACAGAAGAGGT  
AAGTCGTAACACGGTAAGGGTATGGGAAAGTGCGCTTGAAA---CAAAGGTAGCTTAA  
TTAAA-GCATCTCGCTTACACCGAGAACATGTCCGTGAAACTCAGATCATTTTTGA--GCC  
AAAACTTAG-TTAAACTTCGTTCT-AATGTTCCCC-CCACCACCACATCAA---CCAA  
TAAACATTTTCTAC-ATTTAGTAAAGGCGATCAAAAAATGTCTA-AAAGCTATAAAA-T  
TAGTACCGCAAGGGAATAGTGAAATATTAATGAAA---CCTAAAGCACATAAAAGCAGA  
GCTATAACCTCGTACCTTTTGCATCATGGTCTAACTAGTCTAATCAAGCAAAACGAACTT  
TAAGTCTGACCCCCGAAACTAGGTGAGCTACTTAAAAACAGCCTTAC-GGGCTAACCCG  
TCTCTGTTGCAAAAGAGTGGGAAGATTTT-TAAGTAGAGGTGACAGACCTATCGAACCTA  
GAGATAGCTGGTTATTTCAGGAAAAGGATTTAAGTCCTACCTTAGGTTTTTT-ATACC-CC  
C-AAATATCTACCA-AACCTTAAGAGCTATTCAAATAAGGTACAGCCTATTTGAAACAGG  
ATACAACCTCACCAA-----  
-CACCTTCC-AAAAAGCGTTAAAGCTTCATTA--TTATGCATAAAAA-TTCCACCA-CC  
TCTTTTTAACCCT-AAACC-GTACTGAATGATCCCATAGCCCTATGGGAGCCTATATGT  
TAGAACTAGTAACAAGAAGATAGTTCTTCTCCA-AAATGTAAGCATGGGCCAAAATGAAC  
CACTCATTGGCACTTAAAGTTAATAAACCTTAGTAGTAACCCA---GCAAGAAAAATC  
TAC-----TAATTAT-AACGTCAACCTTACACAAGCACATTTCTGGA  
AAGATTAAAAAAATGGGAAGGAACTCGGCAAACTA-TTAACCCCGCCTGTTTACCAAAAA  
CATCGCCTCTTGTTACCC---ATAAGAGGTCCAGCCTGCCAGTGACAAA--GTTAAAC  
GGCCGCGGTACCCTAACCGTGCAAAGGTAGCGCAATCACTTGTTCTTTAAATGAGGACTA  
GTATGAATGGCATCACGAGGGTTATGCTGTCTCCCAATTTACTCAGTGAAACTGATCTC  
CCCGTGAAGAAGCGGGGATAAGAATATAAGACGAGAAGACCCCATGGAGCTTTAAACTCA  
GTATCAACTGCACCACA-AAATAACCTAATATTTAT-GCAA-CCCTGTC-TACTAGTTTT  
CGGTTGGGGTGACCACGGAGTATAAACAAACCTCCACGATGAAAGGAACTAACAACCTAA  
ACCAAGAGCTACAGCTCTAAATATCAAC-----AAATTGACTAAA-TTGATCCAATC  
ACTT--GATCAACGAACCAAGTTACCCTGGGGATAACAGCGCAATCCATTTCAAGAGCTC  
ATATCGACAAATGGGTTTACG-ACC-TCGATGTTGGATCAGGGTATCCAAGTG-GCGCAG  
CCGCTA-CTAA-TGGTTC

>M. mantheyi MN534666, MN534458, MN534559

TTATTATCATCTATTTCTCAACTTACACATGCAAGTATCAGCACACCCGTGAGAACGCC  
TTCCCCCTT-CATAGGACAAGGAGCCGGTATCAGGCACAG---TCT-----TCTAGCCC  
ATGACACCTAGCTTTGCCACACCCTCAAGGGTATTTCAGCAGTGATTAACATTGTTTCATAA  
GCGCCAGCTTGATTTCAGTCAGAGAACCC--AGAGCCGGCTAATACGGTGCCAGCCGCCGC  
GGCTACACCGCTAGGCTCAAGTTGATACTATTTTCGGCGTTAAGCGTGTTTAAAGTGCTC-  
ACTA-AATTAGAATTGAACTTAAACCAAGTTGTGACATGCTTGTTTTTTAAGAAAAACAAA  
CACGAAAGTTATTTCTAAACTAACCCTTGAACCCACGACAGCTAAGACACAACTGGGAT  
TAGGTACCCCACTATGCTTAGCCGTAAAATATTTACTTACACCC-TAAACCGCCCGGAA  
TTACGAGCCCAAGCTTAAAACCCAAAGGACTTGACGGTGTCCACCCACCTAGAGGAGCC  
TGTTCTATAA-TCGATTCCCCC-GATATACCTCACCCTTTTAGCCTT--TCAGCCTGT  
ATACCTCCGTCGTAAGCTTACCATATGAACGCT-TTTTAGTGAGCTAAAAGAT-TTCTAC  
ATAAATACGTCAGGTCAAGGTGCAGCCACGAAGTGGCAAGTAATGGGCTACAATTTCTA  
CAAC--TAGAACACA-CGAAAGACTACATGCAA-CCTAGTCATGAAGGCGGATTTAGAAG  
TAAAAGAAAAATAGAGAGTTCTTTTTAATTAGGCACTGGGACGCGTACACACCGCCCGTC  
ACCCTCTTCAAACGCTCCA-ACTTAG-TTCATAACAAC-TCTATGCACAACAGAAGAGGT  
AAGTCGTAACACGGTAAGGGTATGGGAAAGTGCCTTGGAAA---CAAAGGTAGCTTAA  
TTAAA-GCATCTCGCTTACACCGAGAACATGTCCGTGAAACTCAGATCATTTTGA--GCC  
AAAAATTTAG-TTAAACTTCGTTCT-AATGTTCCCC-CCACCACCACATCAA---CCAA  
TAAAACATTTTCTAC-ATTTAGTAAAGGCGATCAAAAAATGTCTA-AAAGCTATAAAA-T  
TAGTACCGCAAGGGAATAGTGAATATTAATGAAAA---CCTAAAGCACATAAAAGCAGA  
GCTATAACCTCGTACCTTTTGCATCATGGTCTAACTAGTCTAATCAAGCAAACGAACTT  
TAAGTCTGACCCCCCGAACTAGGTGAGCTACTTAAAAACAGCCTTAC-GGGCTAACCCG  
TCTCTGTTGCAAAAGAGTGGGAAGATTTT-TAAGTAGAGGTGACAGACCTATCGAACCTA  
GAGATAGCTGGTTATTCAGGAAAAGGATTTAAGTCTACCTTAGGTTTTTT-ATACC-CC  
C-AAATATTTACCA-AACCTTAAGAGCTATTCAAATAAGGTACAGCCTATTTGAAACAGG  
ATACAACCTCACCAAT-----  
-----TCC-AAAAGCGTTAAAGCTTCATTA---TTACGCATAAAAA-TTCCACCA-CC  
TCTTTTTAACCCT-AAACC-GTACTGAATGATCCCATAGCCCTATGGGAGCCTATATGT  
TAGAACTAGTAACAAGAAGATAGTTCTTCTCCA-AAATGTAAGCATGGGCCAAAATGAAC  
CACTCATTGGCACTTAAAGTTAATAAACCTTAGTAGTAACCCA----GCAAGAAAAATC

TAC-----TAATTAT-AACGTCAATCTTACACAAGCACATTTCTGGA  
AAGATTAATAAATGGGAAGGAACCTCGGCAAATA-TTAACCCCGCCTGTTTACCAAAAA  
CATCGCCTCTTGTTACCC----ATAAGAGGTCCAGCCTGCCAGTGACAAA--GTTAAAC  
GGCCGCGGTACCCTAACCGTGCAAAGGTAGCGCAATCACTTGTTCTTTAAATGAGGACTA  
GTATGAATGGCATCACGAGGGTTATGCTGTCTCCCAATTTACTCAGTGAAACTGATCTC  
CCCGTGAAGAAGCGGGGATAAGAATATAAGACGAGAAGACCCCATGGAGCTTTAAACTCA  
GTATCAATTGCACCACA-AAATAACCTAATATTTAT-GCAA-CCCTGTC-TACTAGTTTT  
CGGTTGGGGTGACCACGGAGTATAAACAAACCTCCACGATGAAAGGAACTAACAACTAA  
ACCAAGAGCTACAGCTCTAAATATCAAC-----AAATTGACTAAA-TTGATCCAATC  
ACTT--GATCAACGAACCAAGTTACCCTGGGGATAACAGCGCAATCCATTTCAAGAGCTC  
ATATCGACAAATGGGTTTACG-ACC-TCGATGTTGGATCAGGGTATCCAAGTG-GCGCAG  
CCGCTA-CTAA-CGGTTC

>M. minuta MN534667, MN534459, MN534560

TTACTATCATCTTTATCTCAACTTACACATGCAAGTATCCGCATCCCGTGAGAACGCC  
TTTCCCCTT-AATAGGATAAGGAGCTGGTATCAGGCACAG---GCC-----CCTAGCCC  
ATGACACCTAGCTTTGCCACACCCTCAAGGGTATTACAGCAGTGATTAACATTGTTTATAA  
GCGCCAGCTTGACTCAGTTAGAGAATTA--AGAGCCGGCCAATACGGTGCCAGCCGCCGC  
GGCTACACCGCTAGGCTCAAGTTGATATT-ACTCGGCGTTAAGCGTGTTTAAAGTGCTA-  
CAAATAATTAGAATTAACTTAAACCAAGTTGTGACACGCTTGTTTCTAAGAAAAACATA  
AACGAAAGTTATTCTAATTTAACCCTTGAACCCACGACAGCTAGGACACAACTGGGAT  
TAGGTACCCACTATGCCTAGCCGTAAATATTTACTTACACCT-TTAACCGCCCGGGAA  
TTACGAGCCCAAGCTTAAACCCAAAGGACTTGACGGTGTCCACCCACCTAGAGGAGCC  
TGTTCTATAA-TCGATTCTCCCC-GATACACCTCACCCTTCTAGCCTC--TCAGCCTGT  
ATACCTCCGTCGTAAGCTTACCATATGAACGAT-TTTTAGTGAGCTAAAAGAT-TTACGC  
ATAAACACGTCAGGTCAAGGTGCAGCCAACGAAATGGTAAGCAATGGGCTACAATTTCTA  
TAAT--TAGAACACA-CGAAAGACTACATGCAA-CTCAGTCATGAAGCGGATTTAGCAG  
TAAAAAGAAAATAGAGAGTTCTTTTTAATTAGGCACTGGGACGCGTACACACCGCCCGTC  
ACCCTCTTCAAACGCTCCA-GCTCAG-TTTATAACACC-ACTATGCACCATAGAAGAGGT  
AAGTCGTAACATGGTAAGCGTACTGGAAAGTGCCTTGGATAAA-CAAATGTAGCTTAA  
TTAAA-GCATCTCGCTTACACCGAAAATATGTCTGTGAAACTCAGATCATTTTGA--GCC

AAAAACTTAGCTTAA--CTCCTTCTCAATGCACACC--TTACTTTATAATAAT---TTAA  
TAAAACATTTTCCAC-ATTTAGTAAAGGCGATCAAAAAATGTCTA-AAAGCTATAAAA-T  
TAGTACCGCAAGGGAACAGTGAAATAAAAAATGAAAA--TCTAAAGCACATAAAAGCAGA  
GTCACATCCTCGTACCTTTTGCATCATGGTTTAACTAGTCTAATCAAGCAAACGAATTT  
TAAGTTTGACCCCCGAACTAGGTGAGCTACTTAAAAACAGCCTTAT-GGGCAAACCCG  
TCTCTGTTGCAAAGAGTGGGAAGATTCT-TAAGTAGAGGTGACAGACCTATCGAACCTA  
GAGATAGCTGGTTATTTCAGGAAAAGGATTTAAGTCTTACCTTAGGTTTTTT-TATAC-TC  
A-TAAATACCCATA-AACCTTAAGAGCTATTCAAATAAGGTACAGCCTATTTGAAACAGG  
ATACAACCTA-----CTAAAAGCAG  
CCACCTTCC-AAAAAGCGTTAAAGCTTAATTA--TTTTTATTAAAAA-TTCCACCA-TT  
TTTCTACAACCCTT-AATTT-ATACTGAATGATCTCATAAGCTTATGAGAGCCTATATGT  
TAAACTAGTAACAAGAAGA-AGACCTTCTCCA-AAATGTAAGCATGAGCCAAAATGAAC  
AATTCATTGGCATTAAAGTTA-TAAACCTCCAGTAGTAACACT----ACAAGAAAAACC  
TAC-----TTACTTT-GACGTCAATCTTACACTAGCACATTTCTGGA  
AAGATTAAAAGAATGGGAAGGAAGCTCGGCAAACCTA-CTAACCCCGCCTGTTTACCAAAAA  
CATCGCCTCTTGCTTCTC----ATAAGAGGTCCAGCCTGCCAGTGACAAA--GTAAAC  
GGCCGCGGTACCCTAACCGTGCAAAGGTAGCGCAATCACTTGTTCTTTAAATGAGGACTA  
GTATGAACGGCATCACGAGGGTTATGCTGTCTCCCCACTCTATTCAGTGAAACTGATTTT  
CCCGTGAAGAAGCGGGGATATAAATATAAGACGAGAAGACCCCATGGAGCTTTAACTTA  
GTATCAACTGCTTTTTTA-AAATAACCTAACATTTAT-GCAA-CCATGAC-TACTAGTTTT  
CGGTTGGGGTGACCACGGAGCAAAAATAAACCTCCACGATGAACGGAACATAACCTAA  
ATCAAGAGTTACAACCTCTAAATATCAAT-----AAATTGACTAT--TTGATCCAATT  
ACTT--GATCAACGAACCAAGTTACCCTGGGGATAACAGCGCAATCCATTTCAAGAGCTC  
ATATCGACAAATGGGTTTACGTACACTCGATGTTGGATCAGGGTATCCCAGTGTGCGCAG  
CCGCTATCTATACGGTTC

>M. minuta MN534668, MN534460, MN534561

TTACTATCATCTTTATCTCAACTTACACATGCAAGTATCCGCATCCCCGTGAGAACGCC  
TTTCCCCTT-AATAGGATAAGGAGCTGGTATCAGGCACAG---GCC-----CCTAGCCC  
ATGACACCTAGCTTTGCCACACCCTCAAGGGTATTTCAGCAGTGATTAACATTGTTTATAA  
GCGCCAGCTTGACTCAGTTAGAGAATTA--AGAGCCGGCCAATACGGTGCCAGCCGCCG



GGCTACACCGCTAGGCTCAAGTTGATATT-ACTCGGCGTTAAGCGTGTTTAAAGTGCTA-  
CAAATAATTAGAATTAACCTTAAACCAAGTTGTGACACGCTTGTTTCTAAGAAAAACATA  
AACGAAAGTTATTCTAATTTAACCACTTGAACCCACGACAGCTAGGACACAACTGGGAT  
TAGGTACCCCACTATGCCTAGCCGTAAAATATTTACTTACACCT-TTAACCGCCTGGGAA  
TTACGAGCCCAAGCTTAAACCCAAAGGACTTGACGGTGTCCACCCACCTAGAGGAGCC  
TGTTCTATAA-TCGATTCTCCCC-GATACACCTCACCCTTCTAGCCTC--TCAGCCTGT  
ATACCTCCGTCGTAAGCTTACCATATGAACGAT-TTTTAGTGAGCTAAAAGAT-TTACGC  
ATAAACACGTCAGGTCAAGGTGCAGCCAACGAAATGGTAAGCAATGGGCTACAATTTCTA  
TAAT--TAGAACACA-CGAAAGACTACATGCAA-CTCAGTCATGAAGGCGGATTTAGCAG  
TAAAAAGAAAATAGAGAGTTCTTTTTAATTAGGCACTGGGACGCGTACACACCGCCCGTC  
ACCCTCTTCAAACGCTCCA-GCTCAG-TTTATAACACC-ACTATGCACCATAGAAGAGGT  
AAGTCGTAACATGGTAAGCGTACTGGAAAGTGCCTTGGATAAA-CAAATGTAGCTTAA  
TTAAA-GCATCTCGCTTACACCGAAAATATGTCTGTGAAACTCAGATCATTTTTGA--GCC  
AAAACTTAGCTTAA--CTCCTTCTCAATGCACACC--TTACTTTATAATAAT--TTAA  
TAAACATTTTCCAC-ATTTAGTAAAGGCGATCAAAAAATGTCTA-AAAGCTATAAAA-T  
TAGTACCGCAAGGGAACAGTGAAATAAAAAATGAAAA--TCTAAAGCACATAAAAGCAGA  
GTCACATCCTCGTACCTTTTGCATCATGGTTTAACTAGTCTAATCAAGCAAACGAATTT  
TAAGTTTGACCCCCGAAACTAGGTGAGCTACTTAAAAACAGCCTTAT-GGGCAAACCCG  
TCTCTGTTGCAAAGAGTGGAAGATTCT-TAAGTAGAGGTGACAGACCTATCGAACCTA  
GAGATAGCTGGTTATTCAGGAAAAGGATTTAAGTCTACCTTAGGTTTTTTT-TATAC-TC  
A-TAAATACCCATA-AACCTTAAGAGCTATTCAAATAAGGTACAGCCTATTTGAAACAGG  
ATACAACCTAA-----CTAAAAGCAG  
CCACCTTCC-AAAAAGCGTTAAAGCTTAATTA---TTTTTATTAAAAA-TTCCACCA-TT  
TTTCTACAACCCTT-AATTT-ATACTGAATGATCTCATAAGCTTATGAGAGCCTATATGT  
TAAACTAGTAACAAGAAGA-AGACCTTCTCCA-AAATGTAAGCATGAGCCAAAATGAAC  
AATTCATTGGCATTAAAGTTA-TAAACCTCCAGTAGTAACACT----ACAAGAAAACC  
TAC-----TTACTTT-GACGTCAATCTTACACTAGCACATTTCTGGA  
AAGATTAAAAGAATGGGAAGGAACCTCGGCAAACCTA-CTAACCCCGCCTGTTTACCAAAAA  
CATCGCCTCTTGCTTCTC----ATAAGAGGTCCAGCCTGCCAGTGACAAA--GTAAAC  
GGCCGCGGTACCCTAACCGTGCAAAGGTAGCGCAATCACTTGTTCTTTAAATGAGGACTA

GTATGAACGGCATCACGAGGGTTATGCTGTCTCCCCACTCTATTCAGTGAAACTGATTTCC  
CCCGTGAAGAAGCGGGGATATAAATATAAGACGAGAAGACCCCATGGAGCTTTAAACTTA  
GTATCAACTGCTTTTTTA-AAATAACCTAACATTTAT-GCAA-CCATGAC-TACTAGTTTT  
CGGTTGGGGTGACCACGGAGCAAAAATAAACCTCCACGATGAACGGAACTAAATACCTAA  
ATCAAGAGTTACAACCTCTAAATATCAAT-----AAATTGACTAT--TTGATCCAATT  
ACTT--GATCAACGAACCAAGTTACCCTGGGGATAACAGCGCAATCCATTTCAAGAGCTC  
ATATCGACAAATGGGTTTACGTACACTCGATGTTGGATCAGGGTATCCCAGTGTGCGCAG  
CCGCTATCTATACGGTTC

>M. minuta MN534669, MN534461, MN534562

TTACTATCATCTTTATCTCAACTTACACATGCAAGTATCCGCATCCCCGTGAGAACGCC  
TTTCCCCTT-AATAGGATAAGGAGCTGGTATCAGGCACAG---GCC-----CCTAGCCC  
ATGACACCTAGCTTTGCCACACCCTCAAGGGTATTCAGCAGTGATTAACATTGTTTATAA  
GCGCCAGCTTGACTCAGTTAGAGAATTA--AGAGCCGGCCAATACGGTGCCAGCCGCCGC  
GGCTACACCGCTAGGCTCAAGTTGATATT-CTCGGCGTTAAGCGTGTTTAAAGTGCTA-  
CAAATAATTAGAATTAACTTAAACCAAGTTGTGACACGCTTGTTCCTAAGAAAAACATA  
AACGAAAGTTATTCTAATTTAACCCTTGAACCCACGACAGCTAGGACACAACTGGGAT  
TAGGTACCCACTATGCCTAGCCGTAAAAATTTACTTACACCT-TTAACCGCCTGGGAA  
TTACGAGCCCAAGCTTAAACCCAAAGGACTTGACGGTGTCCCACCCACCTAGAGGAGCC  
TGTTCTATAA-TCGATTCTCCCC-GATACACCTCACCCTTCTAGCCTC--TCAGCCTGT  
ATACCTCCGTCGTAAGCTTACCATATGAACGAT-TTTTAGTGAGCTAAAAGAT-TTACGC  
ATAAACACGTCAGGTCAAGGTGCAGCCAACGAAATGGTAAGCAATGGGCTACAATTTCTA  
TAAT--TAGAACACA-CGAAAGACTACATGCAA-CTCAGTCATGAAGGCGGATTTAGCAG  
TAAAAGAAAAATAGAGAGTTCTTTTTAATTAGGCACTGGGACGCGTACACACCGCCCGTC  
ACCCTCTTCAAACGCTCCA-GCTCAG-TTTATAACACC-ACTATGCACCATAGAAGAGGT  
AAGTCGTAACATGGTAAGCGTACTGGAAAGTGCGCTTGATAAA-CAAATGTAGCTTAA  
TTAAA-GCATCTCGCTTACACCGAAAATATGTCTGTGAAACTCAGATCATTTTGA--GCC  
AAAACTTAGCTTAA--CTCCTTCTCAATGCACACC--TTACTTTATAATAAT---TTAA  
TAAAACATTTTCCAC-ATTTAGTAAAGGCGATCAAAAAATGTCTA-AAAGCTATAAAA-T  
TAGTACCGCAAGGGAACAGTGAAATAAAAAATGAAAA--TCTAAAGCACATAAAAGCAGA  
GTCACATCCTCGTACCTTTTGCATCATGGTTTAACTAGTCTAATCAAGCAAAACGAATTT

TAAGTTTGACCCCCGAAACTAGGTGAGCTACTTAAAAACAGCCTTAT-GGGCAAACCCG  
TCTCTGTTGCAAAAGAGTGGGAAGATTCT-TAAGTAGAGGTGACAGACCTATCGAACCTA  
GAGATAGCTGGTTATTTCAGGAAAAGGATTTAAGTCCTACCTTAGGTTTTTT-TATAC-TC  
A-TAAATACCCATA-AACCTTAAGAGCTATTCAAATAAGGTACAGCCTATTTGAAACAGG  
ATACAACCTA-----CTAAAAGCAG  
CCACCTTCC-AAAAAGCGTTAAAGCTTAATTA---TTTTTATTAAAAA-TTCCACCA-TT  
TTTCTACAACCCTT-AATTT-ATACTGAATGATCTCATAAGCTTATGAGAGCCTATATGT  
TAAACTAGTAACAAGAAGA-AGACCTTCTCCA-AAATGTAAGCATGAGCCAAAATGAAC  
AATTCATTGGCATTAAAGTTA-TAAACCTCCAGTAGTAACACT----ACAAGAAAAACC  
TAC-----TTACTTT-GACGTCAATCTTACACTAGCACATTTCTGGA  
AAGATTAAAAGAATGGGAAGGAACCTCGGCAAACCTA-CTAACCCCGCCTGTTTACCAAAAA  
CATCGCCTCTTGCTTCTC---ATAAGAGGTCCAGCCTGCCAGTGACAAA--GTAAAC  
GGCCGCGGTACCCTAACCGTGCAAAGGTAGCGCAATCACTTGTTCTTTAAATGAGGACTA  
GTATGAACGGCATCACGAGGGTTATGCTGTCTCCCCACTCTATTTCAGTGAAACTGATTTT  
CCCGTGAAGAAGCGGGATATAAATATAAGACGAGAAGACCCCATGGAGCTTTAAACTTA  
GTATCAACTGCTTTTTTA-AAATAACCTAACATTTAT-GCAA-CCATGAC-TACTAGTTTT  
CGGTTGGGGTGACCACGGAGCAAAAATAAACCTCCACGATGAACGGAACTAAATACCTAA  
ATCAAGAGTTACAACCTCTAAATATCAAT-----AAATTGACTAT--TTGATCCAATT  
ACTT--GATCAACGAACCAAGTTACCCTGGGGATAACAGCGCAATCCATTTCAAGAGCTC  
ATATCGACAAAATGGGTTTACGTACACTCGATGTTGGATCAGGGTATCCCAGTGTGCGCAG  
CCGCTATCTATACGGTTC

>M. achatina MN534670, MN534462, MN534563

TTATCATCATCTTTTCCTTGACTTACACATGCAAGTATCAGCACACCCGTGAGAACGCC  
TTTCACCTT-TATAGACTAAGGAGCCGGTATCAGGCACAGG--AATCAAC--CCTAGCCC  
ATAACACCTAGCTTTGCCACACCCTCAAGGGTATTTCAGCAGTGATTAACATTGTTTATAA  
GCGCCAGCTTGATTCAGTCAGAGGACCT--AGAGCCGGCTAATACGGTGCCAGCCGCCGC  
GGCTACACCGCTAGGCTCAAGTTGATGTT-ACTCGGCGTTAAGCGTGTTTAAAGTGCCC-  
ATCA-GATTAGAGTTAACTTTAACCAAGCCGTGACACGCTTGTTCTTAAGAAAACCACA  
AACGAAAGTTATTCTAACCAATCACTTGAACCCACGACAGCTAGGGCACAACTGGGAT  
TAGGTACCCCACTATGCCTAGCCGTAAAATATTTACTTACACCT-CTAACCGCCTGGGAA

TTACGAGCCCAAGCTTAAAACCCAAAGGACTTGACGGTGTCCCACCCACCTAGAGGAGCC  
TGTTCTATAA-TCGATTCCCCC-GATACACCTAACCCTCCTAGCCTT--TCAGCCTGT  
ATACCTCCGTCGTAAGCTTACCATATGAACGCT-TTTTAGTGAGCTAAAAGAT--TCATC  
ATAAATACGTCAGGTCAAGGTGCAGCCAACGAAGTGGCAAGTAATGGGCTACAATTTCTA  
CAAC--TAGAACACAACGAAAGACTACATGCAA-CCAAGTCATGAAGGCGGATTTAGAAG  
TAAAAGAAAATAGAGAGTTCTTTTTAATTAGGCACTGGGACGCGTACACACCGCCCGTC  
ACCCTCTTCAAATGCTTTT-CCACAG-TATTTAACAAC-TGCCCGCACCACAGAAGAGGT  
AAGTCGTAACACGGTAAGCGTACTGGAAAGTGCCTTGGATAAA-CAAATGTAGCTTAA  
CTAAA-GCATCCCGCTTACACCGAGACTATATCCGTGAAACTCAGATCATTTTTGA--GCC  
AAAACTTAGCTTTA--CTCCACCT-AATGCCCTA--CAAACCTTTAAACA---TAAA  
TAAAACATTTTCTAC-TTTAAGTAAAGGCGATTAAAAAATGTCTT-AAAGCTATAAAA-T  
TAGTACCGCAAGGGAATAGTGAAATATTAATGAAAA---CCTCAAGCACTTTAAAGCAGA  
GCTAAATTCTCGTACCTTTTGCATCATGGTCTAACTAGTCTAATCAAGCAAAACGAACTT  
TAAGTCTGACCCCCGAAACTAAGCGAGCTACTTAAGAACAGCCAAAT-GGGCGAACCCG  
TCTCTGTTGCAAAAGAGTGGGAAGATTTTTTAAGTAGAGGTGATAAACCTACCGAGCTTA  
GAGATAGCTGGTTATTTCAGGAAAAGGATTTAAGTCCTACCTTAGGTTTCTA-GTATA--C  
ACAAATACCCCTCA-AACCTTAAGAGCTATTCAAATAAGGTACAGCCTATTTGAAACAGG  
ATACAACCT-----AGCAG  
CCACCTTT-AAAAAGCGTTAAAGCTTTATTT--TCCTTTTGTATAAA-TTCCACTA-CC  
TCACCTCAACCCAT-AAGCC-ATACTGAATGATTTTCATAACTATATGAAAGCCTATATGT  
TAGAACTAGTAACAAGAAGA-AGCCCTTCTCCA-AAATGTAAGTATAAGCCAAAATGAAC  
TACTCACTGGCAATTAAGTCAATAAACTATTAGTAGTAACTCA----ACAAGAAAAACC  
TAC-----TAATCAC-AACGTTAACCTTACACCAGCACATTTCTGGA  
AAGATTAAGGACGGGAAGGAACCTCGGCAAATA-TTAACCCCGCCTGTTTACCAAAAA  
CATCGCCTCTTGCTTCCC----ATAAGAGGTCCAGCCTGCCAGTGACAAA--GTTAAAC  
GGCCGCGGTACCCTAACCGTGCAAAGGTAGCGCAATCACTTGTTCTTTAAATGAGGACTA  
GTATGAACGGCATCACGAGGGTTATGCTGTCTCCCCGACCATTTCAGTGAAACTGATCTC  
CCCGTGAAGAAGCGGGGATAAAAATATAAGACGAGAAGACCCCATGGAGCTTTAAACTCA  
GAATCAACTGCTACACA-AAATAACCTAATATTTAT-GCAA-CTCTGAT-TTCTAGTTTT  
CGGTTGGGGTGACCACGGAGTAAAATTAACCTCCACGATGAAAGGAAATAATAACCTAA

ACCAAGAGCTACAGCTCTAAGTATTAAT-----AAATTAACCAAA-CTGATCCAATT  
ACTT--GATCAACGAACCAAGTTACCCCTGGGGATAACAGCGCAATCCATTTCAAGAGCTC  
ATATCGACAAATGGGTTTACG-ACC-TCGATGTTGGATCAGGATATCCCAGTG-GCGCAG  
CCGCTA-CTAA-CGGTTC

>M. achatina MN534671, MN534463, MN534564

TTATCATCATCTTTTTCCTCGACTTACACATGCAAGTATCAGCACACCCGTGAGAACGCC  
TTTCACCTT-TATAGACTAAGGAGCCGGTATCAGGCACAGG--AATCAAC--CCTAGCCC  
ATAACACCTAGCTTTGCCACACCCTCAAGGGTATTCAGCAGTGATTAACATTGTTTATAA  
GCGCCAGCTTGATTCAGTCAGAGGACCC--AGAGCCGGCTAATACGGTGCCAGCCGCCGC  
GGCTACACCGCTAGGCTCAAGTTGATGTT-ACTCGGCGTTAAGCGTGTTTAAAGTGCC-  
ATCA-GATTAGAGTTAAACTTTAACCAAGCCGTGACACGCTTGTTCCTAAGAAAGCCATA  
AACGAAAGTTATTCTAACCAATCACTTGAATCCACGACAGCTAGGGTACAACTGGGAT  
TAGGTACCCCACTATGCCTAGCCGTAAAATATTTACTTACACCT-TTAACCGCCTGGGAA  
TTACGAGCCCAAGCTTAAACCCAAAGGACTTGACGGTGTCCCACCCACCTAGAGGAGCC  
TGTTCTATAA-TCGATTCCCCC-GATACACCTAACCCTCCTAGCCTC--TCAGCCTGT  
ATACCTCCGTGTAAGCTTACCATATGAACGCT-TTTTAGTGAGCTAAAAGAT---CCTC  
ATAAATACGTCAGGTCAAGGTGCAGCCAACGAAGTGGCAAGTAATGGGCTACAATTTCTA  
CAAC--TAGAACACAACGAAAGACTACATGCAA-CCAAGTCATGAAGGCGGATTTAGAAG  
TAAAAGAAAAATAGAGAGTTCTTTTTAATTAGGCACTGGGACGCGTACACACCCGCCCGTC  
ACCCTCTTCAAATGCTTTC-CTACAG-TACTTAACAAC-TGCCCGCACCCACAGAAGAGGT  
AAGTCGTAACACGGTAAGCGTACTGGAAAGTGCGCTTGGATAAA-CAAATGTAGCTTAA  
CTAAA-GCATCCCGCTTACACCGAGACTATATCCGTGAAACTCAGATCATTTTGA--GCC  
AAAAACTTAGCTTTA--CTCCACCT-AATGCCCCCA--CAAACTTTTAAACA---TAAGA  
TAAAACATTTTCTAC-TTTAAGTAAAGGCGATTAAAAAATGTCTT-AAAGCTATAAAA-T  
TAGTACCGCAAGGGAATAGTGAAATATTAATGAAAA---CCTCAAGCACTTTAAAGCAGA  
GCTAAATTCTCGTACCTTTTGCATCATGGTCTAACTAGTCTAATCAAGCAAACGAACTT  
TAAGTCTGACCCCCGAAACTAAGCGAGCTACTTAAGAACAGCCAAAT-GGGCCAACCCG  
TCTCTGTTGCAAAAGAGTGGGAAGATTTT-TAAGTAGGGGTGATAAACCTACCGAGCTTA  
GAGATAGCTGGTTATTCAGGAAAAGGATTTAAGTCTACCTTAGGTTTCTC-GTATA--T  
ACAAATACCCCTCA-AACCTTAAGAGCTATTCAAATAAGGTACAGCCTATTTGAAACAGG

ATACAACCT-----AGCAG  
CCACCTTT-AAAAAAGCGTTAAAGCTTTATTT--TCCTTTTGTATAAA-TTCCACTA-CC  
TTACTACAACCCAT-AAACC-ATACTGAATGATTTTCATAACTGTATGAAAGCCTATATGT  
TAGAACTAGTAACAAGAAGA-AGCCCTTCTCCA-AAATGTAAGTATAAGCCAAAATGAAC  
TACTCACTGGCAATTAAGTCAATAAACTATTAGTAGTAACTCA----ACAAGAAAACC  
TAC-----TAATCAC-AACGTTAACCTTACACCAGCACATTTCTGGA  
AAGATTAAGGACGGGAAGGAAGTTCGGCAAATA-CTAACCCCGCCTGTTTACCAAAAA  
CATCGCCTCTTGCTTCCC----ATAAGAGGTCCAGCCTGCCAGTGACAAA--GTAAAC  
GGCCGCGGTACCCTAACCGTGCAAAGGTAGCGCAATCACTTGTTCCTTAAATGAGGACTA  
GTATGAACGGCATCACGAGGGTTATGCTGTCTCCCCGCCCATTCAGTGAAACTGATCTC  
CCCGTGAAGAAGCGGGATAAAAATATAAGACGAGAAGACCCCATGGAGCTTTAAACTCA  
AAATCAACTGCTACACA-AAATAACCTAATATTCAT-GCAA-CTCTGAT-TTCTAGTTTT  
CGGTTGGGGTGACCACGGAGTAAAAATTAACCTCCACGATGAAAGGAAATAATAACCTAA  
ACCAAGAGCTACAGCTCTAAGTATTAAT-----AAATTAACCAAA-CTGATCCAATT  
ACTT--GATCAACGAACCAAGTTACCCTGGGGATAACAGCGCAATCCATTTCAAGAGCTC  
ATATCGACAAATGGGTTTACG-ACC-TCGATGTTGGATCAGGATATCCCAGTG-GCGCAG  
CCGCTA-CTAA-CGGTTC

>M. achatina MN534672, MN534464, MN534565

TTATCATCATCTTTTCCTCGACTTACACATGCAAGTATCAGCACACCCGTGAGAACGCC  
TTTCACCTT-TATAGACTAAGGAGCCGGTATCAGGCACAGG--AATCAAC--CCTAGCCC  
ATAACACCTAGCTTTGCCACACCCTCAAGGGTATTCAGCAGTGATTAACATTGTTTATAA  
GCGCCAGCTTGATTCAGTCAGAGGACCC--AGAGCCGGCTAATACGGTGCCAGCCGCCGC  
GGCTACACCGCTAGGCTCAAGTTGATGTT-ACTCGGCGTTAAGCGTGTTTAAAGTGCCC-  
ATCA-GATTAGAGTTAAACTTTAACCAAGCCGTGACACGCTTGTTCCCTAAGAAAGCCATA  
AACGAAAGTTATTCTAACCAAAATCACTTGAATCCACGACAGCTAGGGTACAACTGGGAT  
TAGGTACCCCACTATGCCTAGCCGTAAAATATTTACTTACACCT-TTAACCGCCTGGGAA  
TTACGAGCCCAAGCTTAAAACCCAAAGGACTTGACGGTGTCCCACCCACCTAGAGGAGCC  
TGTTCTATAA-TCGATTCCCCC-GATACACCTAACCACTCCTAGCCTC--TCAGCCTGT  
ATACCTCCGTCGTAAGCTTACCATATGAACGCT-TTTTAGTGAGCTAAAAGAT--TCCTC  
ATAAATACGTCAGGTCAAGGTGCAGCCAACGAAGTGGCAAGTAATGGGCTACAATTTCTA

CAAC--TAGAACACAACGAAAGACTACATGCAA--CCAAGTCATGAAGGCGGATTTAGAAG  
TAAAAGAAAATAGAGAGTTCTTTTTAATTAGGCACTGGGACGCGTACACACCGCCCGTC  
ACCCTCTTCAAATGCTTTC-CTACAG-TACTTAACAAC-TGCCCGCACCACAGAAGAGGT  
AAGTCGTAACACGGTAAGCGTACTGGAAAGTGCCTTGGATAAA-CAAATGTAGCTTAA  
CTAAA-GCATCCCGCTTACACCGAGACTATATCCGTGAAACTCAGATCATTTTTGA--GCC  
AAAACTTAGCTTTA--CTCCACCT-AATGCCCCCA--CAAACCTTTAAACA---TAAGA  
TAAAACATTTTCTAC-TTTAAGTAAAGGCGATTAAAAAATGTCTT-AAAGCTATAAAA-T  
TAGTACCGCAAGGAATAGTGAAATATTAATGAAAA---CCTCAAGCACTTTAAAGCAGA  
GCTAAATTCTCGTACCTTTTGCATCATGGTCTAACTAGTCTAATCAAGCAAAACGAACTT  
TAAGTCTGACCCCCGAAACTAAGCGAGCTACTTAAGAACAGCCAAAT-GGGCCAACCCG  
TCTCTGTTGCAAAAGAGTGGGAAGATTTTTTAAGTAGGGGTGATAAACCTACCGAGCTTA  
GAGATAGCTGGTTATTCAGGAAAAGGATTTAAGTCCTACCTTAGGTTTCTC-GTATA--T  
ACAAATACCCCTCA-AACCTTAAGAGCTATTCAAATAAGGTACAGCCTATTTGAAACAGG  
ATACAACCT-----CCTAGCAG  
CCACCTTT-AAAAAGCGTTAAAGCTTTATTT--TCCTTTGTATAAA-TTCCACTA-CC  
TTACTACAACCCAT-AAACC-ATACTGAATGATTTTCATAACTGTATGAAAGCCTATATGT  
TAGAACTAGTAACAAGAAGA-AGCCCTTCTCCA-AAATGTAAGTATAAGCCAAAATGAAC  
TACTCACTGGCAATTAAGTCAATAAACTATTAGTAGTAACTCA----ACAAGAAAAACC  
TAC-----TAATCAC-AACGTTAACCTTACACCAGCACATTTCTGGA  
AAGATTAAGGACGGGAAGGAACTCGGCAAATA-CTAACCCCGCTGTTTACCAAAAA  
CATCGCCTCTTGCTTCCC----ATAAGAGGTCCAGCCTGCCAGTGACAAA--GTTAAAC  
GGCCGCGGTACCCTAACCGTGCAAAGGTAGCGCAATCACTTGTCTTTAAATGAGGACTA  
GTATGAACGGCATCACGAGGGTTATGCTGTCTCCCCGCCCATTCAGTGAAACTGATCTC  
CCCGTGAAGAAGCGGGGATAAAAATATAAGACGAGAAGACCCCATGGAGCTTTAAACTCA  
AAATCAACTGCTACACA-AAATAACCTAATATTCAT-GCAA-CTCTGAT-TTCTAGTTTT  
CGGTTGGGGTGACCACGGAGTAAAATTAACCTCCACGATGAAAGGAAATAATAACCTAA  
ACCAAGAGCTACAGCTCTAAGTATTAAT-----AAATTAACCAA-CTGATCCAATT  
ACTT--GATCAACGAACCAAGTTACCCTGGGGATAACAGCGCAATCCATTTCAAGAGCTC  
ATATCGACAAATGGGTTTACG-ACC-TCGATGTTGGATCAGGATATCCAGTG-GCGCAG  
CCGCTA-CTAA-CGGTTC

>M. pineticola MN534673, MN534465, MN534566

TTATTATCAACTCCCTCTCGACTTACACATGCAAGTATCAGCACACCCCGTGAGAACGCC  
TTCACCCTT-AATAGGATAAGGAGCTGGTATCAGGCTCAG---TTT-----TCTAGCCC  
ACGACACCTAGCTTTGCCACACCCTCAAGGGCATTTCAGCAGTGATTAACATTGTTTATAA  
GCGCCAGCTTGATTTCAGTTAGAGAATTT--AGAGCCGGCTAATATGGTGCCAGCCGCCGC  
GGCTACACCACTGGGCTCAAGTTGATTTT-ATTCGGCGTTAAGCGTGTTTAAAGTGCAC-  
ACAA-GATTAGAATTGAACTTAAACCAAACAGTGATACGTTTGTTTTAAAGAAAGACAAA  
AACGAAAGTTATCTAACAAAACCACTTGAACCCACGACAGCTGGGGCACAACTGGGAT  
TAGGTACCCCACTATGCCAGCCGTAAAACATCTATTCACACCT-TAAACCGCCCGGAA  
TTACGAGCTCAAGCTTAAAACCAAAGGACTTGACGGTGTCCACCCACCTAGAGGAGCC  
TGTTCTATAA-TCGATTATCCAC-GATTCACCTCACCCTTCTAGCTTT--TCAGCCTGT  
ATACCTCCGTCGTAAGCTCACCGTATGAACGGT-TTTTAGTGAGCTAAAAGAT-TTTTAC  
GTAAATACGTCAGGTCAAGGTGCAGCCAACGAAGTGGCAAGCAATGGGCTACAATTTCTA  
CACT--TAGAACATAACGAAAGACCGCATGAAA-TACGGTCATGAAGGTGGATTTAGTAG  
TAAAAGAAAATAGAGAGTTCTTTTTAACCAGGCACTGGGACGCGTACACACCGCCCGTC  
ACCCTCTTCAAACGCCTTA-ATTCAG-TACATAACAAG-TACCCGCATCACAGAAGAGGT  
AAGTCGTAACACGGTAAGCGTACTGGAAAAGTGCAGCTTGGATAAA-CAAAATGTAGCTTAA  
TTAAA-GCATCTCGCTTACACCGAGAATATGTCTGTAAACTCGGATCATCTTGA--GCT  
AAAACTTAGCTTAA--TCTCTTCTA-ATGTACAACC--CTTAAAACCCGCAA--CTAAG  
TAAAACATTTTCTAC-ATTTAGTAAAGGCGATCAAAAAATGTCTT-AAAGCTATACAA-T  
TAGTACCGCAAGGGAAAAGTGAAATAGCAATGAAAA--CTCAAGCACATAAAAAGCAGA  
GATTCAATCTTGACCTTTTGCATCATGGTTTAACTAGTCTAATCAAGCAAAATGATTTT  
TAAGTCTGACCCCCGAAACTAGGTGAGCTACTTAAAAACAGCCTTAT-GGGCGAACCCG  
TCTCTGTTGCAAAAGAGTGGGAAGATTTT-TAAGTAGGGGTGATAAGCCTATCGAACCTA  
GAGATAGCTGGTTATTCAGGAAAAGGATTTAAGTCTACCTTAGGTTTTTC-GTATA-TT  
T-AAATACACCTCT-AACCTTAAGAGTCATTCAAATAAGGTACAGCCTATT-GAAACAGG  
ATACAACCTCATCT-----AGTGGGCCCTAAAGCAG  
CCACCTTTT-AAAAGCGTTAAAGCTTTATTTAA-TTTTCTATAAAAA-TTCCACTA-AT  
TATCTGTAACCCTC-AACCT-GTACTGAATGATTTTATAATTTTATGAAAACCTATATGT  
TAGAACTAGTAACAAGAAGGAAGCCCTTCTCCAAAAATGTAAGCATGAACCAAAATGAAC



CACTCATTGGTATTTAAAGTTAATAAACCTCAAGTAGCAACTTA----ACAAGAAAAAAC  
TAT-----TTATTAT-AGCGTCAATCTTACACCAGCACATTTCCGGA  
AAGATTAAGAATGGGAAGGAAGCTCGGCAAACAA-CTGACCTCGCCTGTTTACCAAAAA  
CATCGCCTCCTGCATTTT----ATAGGAGGTCCAGCCTGCCAGTGACAAA--GTTAAAC  
GGCCGCGGTACCCTAACCGTGCAAAGGTAGCGCAATCATTGTCTTTAAATGAGGACTA  
GTATGAATGGCATCACGAAGGTTATGCTGTCTCCCACTCTATTCAGTGAAACTGATCTC  
CCCGTGAAGAAGCGGGGATAAAATTATAAGACGAGAAGACCCCATGGAGCTTTAAACTCA  
GTAACAACCTGTTATTTT---TAAGCCTGATATTTAT-GCAG-CCATGAT-TACTAGTTTT  
CGGTTGGGGTGACCACGGAGTAAACCTAACCTCCACGATGAAAGGAAGTACAAACCTAA  
ATCAAGAGCGACAGCTCCAAATATCAAC-----AAATTGACTAAA-TTGACCCAATT  
ACTT--GATCAACGAACTAAGTTACCCTGGGGATAACAGCGCAATCCATTTCAAGAGCTC  
ATATCGACAAATGGGTTTACG-ACC-TCGATGTTGGATCAGGGTATCCCAGTG-GCGCAG  
TCACTA-CTAA-CGGTTC

>M. pineticola MN534674, MN534466, MN534567

TTATTATCAACTCCCTCTCGACTTACACATGCAAGTATCAGCACACCCGTGAGAACGCC  
TTCACCCTT-AATAGGATAAGGAGCTGGTATCAGGCTCAG---TTT-----TCTAGCCC  
ACGACACCTAGCTTTGCCACACCCTCAAGGGCATTGAGCAGTGATTAACATTGTTTATAA  
GCGCCAGCTTGATTGAGTTAGAGAATTT--AGAGCCGGCTAATATGGTGCCAGCCGCCG  
GGCTACACCACTGGGCTCAAGTTGATTTT-ATTCGGCGTTAAGCGTGTTTAAAGTGCAC-  
ACAA-GATTAGAATTGAACTTAAACCAAACAGTGATACGTTTGTTTTAAAGAAAGACAAA  
AACGAAAGTTATTCTAACAAAACCACTTGAACCCACGACAGCTGGGGCACAACTGGGAT  
TAGGTACCCCACTATGCCAGCCGTAAACATCTATTCACACCT-TAAACCGCCCGGGAA  
TTACGAGCTCAAGCTTAAACCCAAAGGACTTGACGGTGTCCCACCCACCTAGAGGAGCC  
TGTTCTATAA-TCGATTATCCAC-GATTCACCTCACCCTTCTAGCTTT--TCAGCCTGT  
ATACCTCCGTCGTAAGCTCACCGTATGAACGGT-TTTTAGTGAGCTAAAAGAT-TTTTAC  
GTAAATACGTCAGGTCAAGGTGCAGCCAACGAAGTGGAAGCAATGGGCTACAATTTCTA  
CACT--TAGAACATAACGAAAGACCGCATGAAA-TACGGTCATGAAGGTGGATTTAGTAG  
TAAAAAGAAAATAGAGAGTTCTTTTTAACCAGGCACTGGGACGCGTACACACCGCCCGTC  
ACCCTCTTCAAACGCCTTA-ATTCAG-TACATAACAAG-TACCCGCATCACAGAAGAGGT  
AAGTCGTAACACGGTAAGCGTACTGGAAAGTGCGCTTGGATAAA-CAAATGTAGCTTAA

TTAAA-GCATCTCGCTTACACCGAGAATATGTCTGTAAACTCGGATCATCTTGA--GCT  
AAAAACTTAGCTTAA--TCTCTTCTA-ATGTACAACC--CTTAAAACCCGCAA--CTAAG  
TAAAACATTTTCTAC-ATTTAGTAAAGGCGATCAAAAAATGTCTT-AAAGCTATACAA-T  
TAGTACCGCAAGGAAAAGTGAATAGCAATGAAAA--CCTCAAGCACATAAAAGCAGA  
GATTCAATCTTGTACCTTTTGCATCATGGTTTAACTAGTCTAATCAAGCAAATGATTTT  
TAAGTCTGACCCCCGAACTAGGTGAGCTACTTAAAAACAGCCTTAT-GGGCGAACCCG  
TCTCTGTTGCAAAGAGTGGGAAGATTTT-TAAGTAGGGGTGATAAGCCTATCGAACCTA  
GAGATAGCTGGTTATTCAGGAAAAGGATTTAAGTCTTACCTTAGGTTTTTC-GTATA-TT  
T-AAATACACCTCT-AACCTTAAGAGTCATTCAAATAAGGTACAGCCTATT-GAAACAGG  
ATACAACCTCATCT-----AGTGGGCCCTAAAGCAG  
CCACCTTTT-AAAAAGCGTTAAAGCTTTATTTAA-TTTTCTATAAAAA-TTCCACTA-AT  
TATCTGTAACCCTC-AACCT-GTACTGAATGATTTTATAATTTTATGAAAACCTATATGT  
TAGAACTAGTAACAAGAAGGAAGCCCTTCTCCA-AAATGTAAGCATGAACCAAATGAAC  
CACTCATTGGTATTTAAAGTTAATAAACCTCAAGTAGCAACTTA----ACAAGAAAAAAC  
TAT-----TTATTAT-AGCGTCAATCTTACACCAGCACATTTCCGGA  
AAGATTTAAAGAATGGGAAGGAAGTTCGGCAAACAA-CTGACCTCGCCTGTTTACCAAAAA  
CATCGCCTCCTGCATTTT----ATAGGAGGTCCAGCCTGCCAGTGACAAA--GTTAAAC  
GGCCGCGGTACCCTAACCGTGCAAAGGTAGCGCAATCATTTGTTCTTTAAATGAGGACTA  
GTATGAATGGCATCACGAAGGTTATGCTGTCTCCCCACTCTATTCAGTGAAACTGATCTC  
CCCGTGAAGAAGCGGGGATAAAATTATAAGACGAGAAGACCCCATGGAGCTTTAAACTCA  
GTAACAACCTGTTATTTT---TAAGCCTGATATTCAT-GCAG-CCATGAT-TACTAGTTTT  
CGGTTGGGGTGACCACGGAGTAAAACCTAACCTCCACGATGAAAGGAAGTACAAACCTAA  
ATCAAGAGCGACAGCTCCAAATATCAAC-----AAATTGACTAAA-TTGACCCAATT  
ACTT--GATCAACGAACTAAGTTACCCTGGGGATAACAGCGCAATCCATTTCAAGAGCTC  
ATATCGACAAATGGGTTTACG-ACC-TCGATGTTGGATCAGGGTATCCCAGTG-GCGCAG  
TCACTA-CTAA-CGGTTC

>M. pineticola MN534675, MN534467, MN534568

TTATTATCAACTCCCTCTCGACTTACACATGCAAGTATCAGCACACCCGTGAGAACGCC  
TTCACCCTT-AATAGGATAAGGAGCTGGTATCAGGCTCAG---TTT-----TCTAGCCC  
ACGACACCTAGCTTTGCCACACCCTCAAGGGCATTACAGCAGTGATTAACATTGTTTATAA

CGGCCAGCTTGATTAGTTAGAGAATTT--AGAGCCGGCTAATATGGTGCCAGCCGCCGC  
GGCTACACCACTGGGCTCAAGTTGATTTT-ATTCGGCGTTAAGCGTGTTTAAAGTGCAC-  
ACAA-GATTAGAATTGAACTTAAACCAAACAGTGATACGTTTGTTTTAAAGAAAGACAAA  
AACGAAAGTTATTCTAACAAAACCACTTGAACCCACGACAGCTGGGGCACAACTGGGAT  
TAGGTACCCCACTATGCCAGCCGTAAACATCTATTACACCT-TAAACCGCCCGGAA  
TTACGAGCTCAAGCTTAAACCCAAAGGACTTGACGGTGTCCACCCACCTAGAGGAGCC  
TGTTCTATAA-TCGATTATCCAC-GATTCACCTCACCCTTCTAGCTTT--TCAGCCTGT  
ATACCTCCGTCGTAAGCTCACCGTATGAACGGT-TTTTAGTGAGCTAAAAGAT-TTTTAC  
GTAAATACGTCAGGTCAAGGTGCAGCCAACGAAGTGGCAAGCAATGGGCTACAATTTCTA  
CACT--TAGAACATAACGAAAGACCGCATGAAA-TACGGTCATGAAGGTGGATTTAGTAG  
TAAAAGAAAATAGAGAGTTCTTTTTAACCAGGCACTGGGACGCGTACACACCGCCCGTC  
ACCCTCTTCAAACGCCTTA-ATTCAG-TACATAACAAG-TACCCGCATCACAGAAGAGGT  
AAGTCGTAACACGGTAAGCGTACTGGAAAGTGCCTTGGATAAA-CAAATGTAGCTTAA  
TTAAA-GCATCTCGCTTACACCGAGAATATGTCTGTAAACTCGGATCATCTTGA--GCT  
AAAACTTAGCTTAA--TCTCTTCTA-ATGTACAACC--CTTAAAACCCGCAA--CTAAG  
TAAACATTTTCTAC-ATTTAGTAAAGGCGATCAAAAAATGTCTT-AAAGCTATACAA-T  
TAGTACCGCAAGGGAAAAGTGAAATAGCAATGAAAA--CCTCAAGCACATAAAAGCAGA  
GATTCAATCTTGACCTTTTGCATCATGGTTTAACTAGTCTAATCAAGCAAATGATTTT  
TAAGTCTGACCCCCGAAACTAGGTGAGCTACTTAAAAACAGCCTTAT-GGGCGAACCCG  
TCTCTGTTGCAAAGAGTGGGAAGATTTT-TAAGTAGGGGTGATAAGCCTATCGAACCTA  
GAGATAGCTGGTTATTTCAGGAAAAGGATTTAAGTCTTACCTTAGGTTTTTC-GTATA-TT  
T-AAATACACCTCT-AACCTTAAGAGTCATTCAAATAAGGTACAGCCTATT-GAAACAGG  
ATACAACCTCATCT-----AGTGGGCCCTAAAGCAG  
CCACCTTTT-AAAAGCGTTAAAGCTTTATTTAA-TTTTCTATAAAAA-TTCCACTA-AT  
TATCTGTAACCCTC-AACCT-GTACTGAATGATTTTATAATTTTATGAAAACCTATATGT  
TAGAACTAGTAACAAGAAGGAAGCCCTTCTCCA-AAATGTAAGCATGAACCAAATGAAC  
CACTCATTGGTATTTAAAGTTAATAAACCTCAAGTAGCAACTTA----ACAAGAAAAAAC  
TAT-----TTATTAT-AGCGTCAATCTTACACCAGCACATTTCCGGA  
AAGATTAAGAATGGGAAGGAAGTCTCGCAAACAA-CTGACCTCGCCTGTTTACCAAAAA  
CATCGCCTCCTGCATTTT----ATAGGAGGTCCAGCCTGCCAGTGACAAA--GTAAAC

GGCCGCGGTACCCTAACCGTGCAAAGGTAGCGCAATCATTTGTTCTTTAAATGAGGACTA  
GTATGAATGGCATCACGAAGGTTATGCTGTCTCCCCACTCTATTCAGTGAAACTGATCTC  
CCCGTGAAGAAGCGGGGATAAAATTATAAGACGAGAAGACCCCATGGAGCTTTAAACTCA  
GTAACAACCTGTTATTTT---TAAGCCTGATATTTAT-GCAG-CCATGAT-TACTAGTTTT  
CGGTTGGGGTGACCACGGAGTAAACCTAACCTCCACGATGAAAGGAAGTACAAACCTAA  
ATCAAGAGCGACAGCTCCAAATATCAAC-----AAATTGACTAAA-TTGACCCAATT  
ACTT--GATCAACGAACTAAGTTACCCTGGGGATAACAGCGCAATCCATTTCAAGAGCTC  
ATATCGACAAATGGGTTTACG-ACC-TCGATGTTGGATCAGGGTATCCCAGTG-GCGCAG  
TCACTA-CTAA-CGGTTC

>M. pineticola MN534676, MN534468, MN534569

TTATTATCAACTCCCTCTCGACTTACACATGCAAGTATCAGCACACCCGTGAGAACGCC  
TTCACCCTT-AATAGGATAAGGAGCTGGTATCAGGCTCAG---TTT-----TCTAGCCC  
ACGACACCTAGCTTTGCCACACCCTCAAGGGCATTTCAGCAGTGATTAACATTGTTTATAA  
GCGCCAGCTTGATTTCAGTTAGAGAATTT--AGAGCCGGCTAATATGGTGCCAGCCGCCGC  
GGCTACACCACTGGGCTCAAGTTGATTTT-ATTCGGCGTTAAGCGTGTTTAAAGTGCAC-  
ACAA-GATTAGAATTGAACTTAAACCAAACAGTGATACGTTTGTTTTAAAGAAAGACAAA  
AACGAAAGTTATTCTAACAAAACCACTTGAACCCACGACAGCTGGGGCACAACTGGGAT  
TAGGTACCCCACTATGCCAGCCGTAAACATCTATTCACACCT-TAAACCGCCCGGGAA  
TTACGAGCTCAAGCTTAAACCCAAAGGACTTGACGGTGTCCCACCCACCTAGAGGAGCC  
TGTTCTATAA-TCGATTATCCAC-GATTCACCTCACCCTTATAGCTTT--TCAGCCTGT  
ATACCTCCGTCGTAAGCTCACCGTATGAACGGT-TTTTAGTGAGCTAAAAGAT-TTTTAC  
GTAAATACGTCAGGTCAAGGTGCAGCCAACGAAGTGGCAAGCAATGGGCTACAATTTCTA  
CACT--TAGAACATAACGAAAGACCCGCATGAAA-TACGGTCATGAAGGTGGATTTAGTAG  
TAAAAGAAAATAGAGAGTTCTTTTTAACCAGGCACTGGGACGCGTACACACCCGCCCGTC  
ACCCTCTTCAAACGCCTTA-ATTCAG-TACATAACAAG-TACCCGCATCACAGAAGAGGT  
AAGTCGTAACACGGTAAGCGTACTGGAAAGTGCCTTGGATAAA-CAAATGTAGCTTAA  
TTAAA-GCATCTCGCTTACACCGAGAATATGTCTGTAAACTCGGATCATCTTGA--GCT  
AAAACTTAGCTTAA--TCTCTTCTA-ATGTACAACC--CTTAAAACCCGCAA--CTAAG  
TAAAACATTTTCTAC-ATTTAGTAAAGGCGATCAAAAAATGTCTT-AAAGCTATACAA-T  
TAGTACCGCAAGGGAAAAGTGAAATAGCAATGAAAA--CCTCAAGCACATAAAAGCAGA

GATTCAATCTTGTACCTTTTGCATCATGGTTTAACTAGTCTAATCAAGCAAATGATTTT  
TAAGTCTGACCCCCGAAACTAGGTGAGCTACTTAAAAACAGCCTTAT-GGGCGAACCCG  
TCTCTGTTGCAAAAGAGTGGGAAGATTTT-TAAGTAGGGGTGATAAGCCTATCGAACCTA  
GAGATAGCTGGTTATTTCAGGAAAAGGATTTAAGTCTACCTTAGGTTTTTC-GTATA-TT  
T-AAATACACCTCT-AACCTTAAGAGTCATTCAAATAAGGTACAGCCTATT-GAAACAGG  
ATACAACCTCATCT-----AGTGGGCCCTAAAGCAG  
CCACCTTTT-AAAAAGCGTTAAAGCTTTATTTAA-TTTTCTATAAAAA-TTCCACTA-AT  
TATCTGTAACCCTC-AACCT-GTACTGAATGATTTTATAATTTTATGAAAACCTATATGT  
TAGAACTAGTAACAAGAAGGAAGCCCTTCTCCA-AAATGTAAGCATGAACCAAATGAAC  
CACTCATTGGTATTTAAAGTTAATAAACCTCAAGTAGCAACTTA----ACAAGAAAAAAC  
TAT-----TTATTAT-AGCGTCAATCTTACACCAGCACATTTCCGGA  
AAGATTAAGAATGGGAAGGAAGCTCGGCAAACAA-CTGACCTCGCCTGTTTACCAAAAA  
CATCGCCTCCTGCATTTT---ATAGGAGGTCCAGCCTGCCAGTGACAAA--GTAAAC  
GGCCGCGGTACCCTAACCGTGCAAAGGTAGCGCAATCATTTGTTCTTTAAATGAGGACTA  
GTATGAATGGCATCACGAAGTTATGCTGTCTCCCCACTCTATTTCAGTGAAACTGATCTC  
CCCGTGAAGAAGCGGGGATAAAATTATAAGACGAGAAGACCCCATGGAGCTTTAAACTCA  
GTAACAACCTGTTATTTT---TAAGCCTGATATTTAT-GCAG-CCATGAT-TACTAGTTTT  
CGGTTGGGGTGACCACGGAGTAAAACCTAACCTCCACGATGAAAGGAAGTACAAACCTAA  
ATCAAGAGCGACAGCTCCAAATATCAAC-----AAATTGACTAAA-TTGACCCAATT  
ACTT--GATCAACGAACCTAAGTTACCCTGGGGATAACAGCGCAATCCATTTCAAGAGCTC  
ATATCGACAAAATGGGTTTACG-ACC-TCGATGTTGGATCAGGGTATCCCAGTG-GCGCAG  
TCACTA-CTAA-CGGTTC

>M. heymonsi MN534677, MN534469, MN534570

TTATTATCAACTTTTTCTTGATTTACACATGCAAGTATCAGCACACCCGTGAGAACGCC  
TTTACCCTT-TATAGGACAAGGAGCTGGTATCAGGCTCAG---TCT-----TCTAGCCC  
ATAACACCTAGCTTTGCCACACCCTCAAGGGTATTTCAGCAGTGATTAACATTGTATATAA  
GCGCCAGCTTGACCCAGTCAAAGATCCT--AGAGCCGGCTAATACGGTGCCAGCCGCCG  
GGCTACACCGCTAGGCTCAAGTTGATATT-AATCGGCGTTAAGCGTGTTTAAAGTGCAC-  
AAGA-GATTAGAATTAACCTCAAACCAAGCTGTGACACGCTTGTTTTTAAGAAAAACAAA  
AACGAAAGTTATTCTAACCAACCACTTGAATCCACGACAGCTAGGACACAACTGGGAT

TAGGTACCCCACTATGCCTAGCCGTAAAAATATTTATTTACACCT-TTAACCGCCTGGGAA  
TTACGAGCCCAAGCTTAAAACCCAAAGGACTTGACGGTGCCCCACCCACCTAGAGGAGCC  
TGTTCTATAA-TCGATTCTCCCC-GATATACCTCACCCTTCTAGCCTA--TCAGCCTGT  
ATACCTCCGTCGTAAGCTTACCATATGAACGCT-TTTTAGTGAGCTAAAAGAT--TTTAC  
ATAAATACGTCAGGTCAAGGTGCAGCCCACGAAGTGGAAAGAAATGGGCTACAATTTCTA  
AAA--TAGAACACAACGAAAGACTACATGCAA-CTTAGTCATGAAGGCGGATTTAGTAG  
TAAAAGAAAATAGAGTGTTCTTTTTAATTAGGCGCTGGGACGCGTACACACCGCCCGTC  
ACCCTCTTCAAACGCCTTA--TCAAG-TTTATAACAAC-ACCACGCATTACAGAAGAGGT  
AAGTCGTAACACGGTAAGCGTACTGGAAAGTGCCTTGGATAAA-CAAATGTAGCTTAA  
TCAA-GCATCTCGCTTACACCGAGAACATATCTGTGATACCCGGATCATTTTTGA--GCT  
AAAACTTAGCTTTA--CTTCTCTCCAATGTTTACCC-GCGCCTC--AAATAA--CAAAA  
TAAACATTTTACAT-ATTAAGTAAAGGCGATTAAAAAATATCTT-AAAGCTATAAAA-C  
AAGTACCGCAAGGGAATAGTGAAATAATAATGAAAA--CTAAAGCACATAAAAAGCAGA  
GACTCAACCTCGTACCTTTTGCATCATGGTCTAACTAGTCCCTTCGAGCAAAATGAGTTT  
TAAGTTTGATCCCCGAAACTAGGTGAGCTACTTAAAAACAGCCTTCT-GGGCCAACCCG  
TCTCTGTTGCAAAAGAGTGGGAAGATTTT-TAAGTAGAGGTGATAAACCTACCGAACCTA  
GAGATAGCTGGTTATTTCAGGAAAAGGATTTAAGTCCTACCTTATGTTTTTT-GTACA--T  
ACAAGTACCCCATC-AACCCTT-----  
-----AGCAG  
CCACCTTT-AAGAAAGCGTTAAAGCTTCATTA--TATTTTATAAAAA-TTTCGCTA-AT  
TTTCTAAAACCCTT-AACCT-GTACTGAATGGTCTCATGACTTCATGAGAGTCTATATGT  
TAGAACTAGTAACAAGAAGA-AGCCCTTCTCCA-AAATGTAAGCATGAGCCAAAATGAAC  
TATTCATTGGCATTAAAGTTAATAATCTTCTAGTAGTAACCTGC----TCAAGAAAAATC  
TAC-----TATTCTT-AACGTCAACCTTACACCAGCACATTTCTGGA  
AAGATTAAGACTAGGAAGGAACTCGGCAAACA-TTAACCCCGCCTGTTTACCAAAAA  
CATCGCCTCCTGATTTTT---ATAGGAGGTCTAGCCTGCCAGTGACAAA--GTTAAAC  
GGCCGCGGTACCCTAACCGTGCAAAGGTAGCGCAATCACTTGTTCTTTAAATGAGGACTA  
GTATGAACGGCATCACGAGGGTTATGCTGTCTCCCTACTTTATTTCAGTGAAACTGATCTC  
CCCGTGAAGAAGCGGGATAAAAATATAAGACGAGAAGACCCCATGGAGCTTTAAACTCA  
GTGTCAACTGCTATGTT--TAAAACCTAATATACAA-GCAATTTCTGAC-TACTAGTTTT

CGGTTGGGGTGACCACGGAGTAAAACCTAACCTCCACGATGAAAGGAAATAACAACCTAA  
ATTAAGAGCTACAACCTCTAAATATCAAT-----AAATTGACTGA--TTGATCCAATT  
AATT--GATCAACGAACCAAGTTACCCTGGGGATAACAGCGCAATCCATTTCAAGAGCTC  
CTATCGACAAATGGGTTTACG-ACC-TCGATGTTGGATCAGGGTATCCCAGTG-GCGCAG  
CTGCTA-CTAA-TGGTTC

>M. heymonsi MN534678, MN534470, MN534571

TTATTATCAACTTTTTCTTAATTTACACATGCAAGTTTCAGCACACCCGTGAGAACGCC  
TTTACCCTT-AATAGGACAAGGAGCTGGTATCAGGCTCAG---TCT-----TCTAGCCC  
ATAACACCTAGCTTTGCCACACCCTCAAGGGTATTCAGCAGTGATTAACATTGTTTATAA  
GCGCCAGCTTGAACCAGTTAAAGAACAT--AGAGCCGGCCAATACGGTGCCAGCCGCCGC  
GGCTACACCGCTAGGCTCAAGTTGATATT-AACCGGCGTTAAGCGTGTTTAAAGTGCAC-  
AAAA-GATTAGAATTGAACTTAAACCAAGCTGTGACACGCTTGTTTTTAAGAAAAACATA  
AACGAAAGTTATTCTAACCAACCACTTGAATCCACGACAGCTAGGACACAACTGGGAT  
TAGGTACCCCACTATGCCTAGCCGTAAAATATTTATTTACACCT-TTCACCGCCCGGGAA  
TTACGAGCCCAAGCTTAAAACCCAAAGGACTTGACGGTGCCCCACCCACCTAGAGGAGCC  
TGTTCTATAA-TCGATTCTCCCC-GATATACCTCACCACTTCTAGCCTA--TCAGCCTGT  
ATACCTCCGTCGTAAGCTTACCATATGAACGCT-TTTTAGTGAGCTAAAAGAT--TTTAC  
ATAAACACGTCAGGTCAAGGTGCAGCCCACGAAGTGGTAAGTAATGGGCTACAATTTCTA  
AAA---TAGAACATAACGAAAGACTATATGCAA-CTTAGTCATGAAGGCGGATTTAGTAG  
TAAAAGAAAAATAGAGTGTTCTTTTTAATTAGGCGCTGGGACGCGTACACACCGCCCGTC  
ACCCTCTTCAAACGCTTTT--CCAAG-TTTATAACAAT-ATTATGCACTACAGAAGAGGT  
AAGTCGTAACACGGTAAGCGTACTGGAAAGTGCGCTTGGATAAA-CAAAATGTAGCTTAA  
CTAAA-GCATCTCGCTTACACCGAGAATATATCTGTGATACCCAGATCATTTTGA--GCT  
AAAAACTTAGCTTTA--CTTCTCTCTAATGCTGACCC-CAACCTT--AAACAA--TAAAA  
TAAAACATTTTACAC-ATTAAGTAAAGGCGATTAATAAATGTCTT-AAAGCTATAAAA-C  
AAGTACCGCAAGGGAACAGTGAAATAATAATGAAAA---TTAAAGCACATAAAAGCAGA  
GCCTTAACCTCGTACCTTTTGCATCATGGTCTAACTAGTCCCCTCGAGCATAATGAATTT  
TAAGTTTGACCCCCGAACTAGGTGAGCTACTTAAAAACAGCCTTAT-GGGCCAACCCG  
TCTCTGTTGCAAAAGAGTGGGAAGATTTTTTTTAGTAGAGGTGATAAACCTACCGAACCTA  
GAGATAGCTGGTTATTCAGGAAAAGGATTTAAGTCTACCTTAGGTTTTTT-GTACA-TC

ACAAGTACCCCAA--AACCT-----  
-----AGCAG  
CCACCTTC-AAAAAAGCGTTAAAGCTTCATTGG--TTTTTTATAAAAA-TCCCTTTA-AT  
TTTTTATAACCCCT-AATCT-GTACTGAATGGTCTCATGACTTCATGAGAGCCTATATGT  
TAGAACTAGTAACAAGAAGA-AGCCCTTCTCCA-AAATGTAAGCATGAGCCAAAACGAAC  
AATTCATCGGCATTTAAAGTTAATAATCTCCTAGTAGTAACCTT-----TCAAGAAAAC  
TAC-----TATATTT-AACGTCAACCTTACACCAGCTCATTATGGA  
AAGATTAAAAGACTAGGAAGGAACCTCGGCAAATAA-TTAACCCCGCCTGTTTACCAAAAA  
CATCGCCTCCTGATTTTC----ATAGGAGGTCTAGCCTGCCAGTGACAAA--GTAAAC  
GGCCGCGGTACCCTAACCGTGCAAAGGTAGCGCAATCACTTGTTCTTTAAATGAGGACTA  
GTATGAACGGCATCACGAGGGTTATGCTGTCTCCCTACTTTATTTCAGTGAAACTGATCTC  
CCCGTGAAGAAGCGGGGATAAAAATATAAGACGAGAAGACCCCATGGAGCTTTAAACTCA  
GTATCAACTGCCATTAT--TAAAACCTAATACCCAA-GCAGTATGTGAC-TACTAGTTTT  
CGGTTGGGGTGACCACGGAGTAAAACCTAACCTCCATGATGAAAGGAAATGATAACCTAA  
ATTAAGAGCAACAACCTCTAAATATCAAA-----AAATTGACTAAA-TTGATCCAATT  
AATT--GATCAACGAACCAAGTTACCCTGGGGATAACAGCGCAATCCATTTCAAGAGCTC  
TTATCGACAAAATGGGTTTACG-ACC-TCGATGTTGGATCAGGGTATCCCAGTG-GCGCAG  
CCGCTA-CTAA-CGGTTC

>M. heymonsi MN534679, MN534471, MN534572

TTATTATCAACTTTTTCTTGATTTACACATGCAAGTATCAACACACCCGTGAGAACGCC  
TTTACCCTT-TATAGGACAAGGAGCTGGTATCAGGCTCAG---TCT-----TCTAGCCC  
ATAACACCTAGCTTTGCCACACCCTCAAGGGTATTTCAGCAGTGATTAACATTGTTTCATAA  
GCGCCAGCTTGACTCAGTCAAAGAACCT--AGAGCCGGCCAATACGGTGCCAGCCGCCGC  
GGCTACACCGCTAGGCTCAAGTTGATATT-AATCGGCGTTAAGCGTGTTTAAAGTATGT-  
AAAA-GATTAGAATTAACCTTAAACCAAGCTGTGACACGCTTGTTCTTAAGAAAAACAAA  
AACGAAAGTTATTCTAACTAAACCACTTGAACCCACGATAGCTAGGACACAACTGGGAT  
TAGGTACCCCACTATGCCTAGCCGTAAAATATTTATTTACACCT-TAAACCGCCAGGGAA  
TTACGAGCCCAAGCTTAAAACCCAAAGGACTTGACGGTGCCCCACCCACCTAGAGGAGCC  
TGTTCTATAA-TCGATTCTCCCC-GATATACCTCACCCTTCTAGCCTA--TCAGCCTGT  
ATACCTCCGTCGTAAGCTTACCATATGAACGCT-TTTTAGTGAGCTAAAAGAT--TTTAC



ATAAATACGTCAGGTCAAGGTGCAGCCCACGAAGTGGTAAGTAATGGGCTACAATTTCTA  
GAA--TAGAACATAACGAAAGACTATATGCAA-CTTAGTCATGAAGGCGGATTTAGTAG  
TAAAAAGAAAATAGAGCGTTCCTTTTTAATCAGGCGCTGGGACGCGTACACACCGCCCGTC  
ACCCTCTTCAAACGCTTTA--TCAAG-TTTATAACAAC-ATTATGCACTACAGAAGAGGT  
AAGTCGTAACACGGTAAGCGTACTGGAAAGTGCCTTGGATAAA-CAAATGTAGCTTAA  
TCAA-GCATCTCGCTTACACCGAGAACATATCTGTGATACCCGGATCATTTTTGA--GCT  
GATAACTTAGCTTTA--CTTCTCTCAAATGTCCACTC-TTACCTA--AAAAA--CAAAA  
TAAAACATTTTACAC-ATTAAGTAAAGGCGATTAAAAAATGTCTT-AAAGCTATAAAA-C  
AAGTACCGCAAGGGAACAGTGAAATAATAATGAAAA----CTAAAGCACATAAAAAGCAGA  
GCCTTAACCTCGTACCTTTTGCATCATGGTCTAACTAGTCTCCTCGAGCAAAATGAGTTT  
TAAGTTTGATCCCCGAAACTAGGTGAGCTACTTAAAAACAGCCTTCT-GGGCCAACCCG  
TCTCTGTTGCAAAGAGTGGAAGATTTTTTAAGTAGAGGTGATAAACCTACCGAACCTA  
GAGATAGCTGGTTATTTCAGGAAAAGGATTTAAGTCCTACCTTAGGTTTTTT-GTACA-AT  
ACAAGTACCC-----  
-----  
-----TTGTAAAA--TTCCACTA-AT  
TTTCTAAAACCTT-AACCT-GTACTGAATGGTCTTATGACTTCATGAGAGCCTATATGT  
TAGAACTAGTAACAAGAAGA-AGCCCTTCTCCA-AAATGTAAGCATGAGCCAAAATGAAC  
TATTCATTGGCATTAAAGTTAATAATTCCTAGTAGTAACCTT---TTCAAGAAAAACC  
TAC-----TATATTC-AACGTCAACCTTACACCAGCACATTTCTGGA  
AAGATTAAGACTAGGAAGGAACTCGGCAAACAA-TTAACCCCGCCTGTTTACCAAAAA  
CATCGCCTCCTGATTATT----ATAGGAGGTCTAGCCTGCCAGTGACAAA--GTAAAC  
GGCCGCGGTACCCTAACCGTGCAAAGGTAGCGCAATCACTTGTTCTTTAAATGAGGACTA  
GTATGAACGGCATCACGAGGGTTATGCTGTCTCCCTACTTTATTTCAGTGAAACTAATCTC  
CCCGTGAAGAAGCGGGGATAAAAATATAAGACGAGAAGACCCCATGGAGCTTTAAACTCA  
GTATCAACTGCCATAAT--TAAACTTAATATTTCAA-GCAATTTCTGAT-TACTAGTTTT  
CGGTTGGGGTGACCACGGAGTAAACCTAACCTCCATGATGAAAGGAAATAATAACCTAA  
ATTAAGAGCTACAGCTCTAAATATCAAT-----AAATTGACTAA--TTGACCCAATT  
ATTT--GATCAACGAACCAAGTTACCCTGGGGATAACAGCGCAATCCATTTCAAGAGCTC  
TTATCGACAAATGGGTTTACG-ACC-TCGATGTTGGATCAGGGTATCCAGTG-GCGCAG

C-----

>M. heymonsi MN534680, MN534472, MN534573

TTATTATCAACTTTTTCTTGATTTACACATGCAAGTATCAGCACACCCGTGAGAACGCC  
TTCAACCTCATATAGGACAAGGAGCTGGTATCAGGCTCAG--ATCT-----TCTAGCCC  
ATAACACCTAGCTTTGCCACACCCTCAAGGGTATTCAGCAGTGATTAACATTGTATATAA  
GCGCCAGCTTGACCCAGTCAAAGAACCT--AGAGCCGGCTAATACGGTGCCAGCCGCCGC  
GGCTACACCGCTAGGCTCAAGTTGATATT-AATCGGCGTTAAGCGTGTTTAAAGTGCAC-  
AAAGAGATTAGAATTAACCTCAAACCAAGCTGTGACACGCTTGTTTTTAAGAAAAACAAA  
AACGAAAGTTATTCTAACCAAACCACTTGAATCCACGACAGCTAGGACACAACTGGGAT  
TAGGTACCCCACTATGCCTAGCCGTAAAATATTTATTTACACCT-TTAACCGCCCGGAA  
TTACGAGCCCAAGCTTAAAACCAAAGGACTTGACGGTGCCCCACCCACCTAGAGGAGCC  
TGTTCTATAA-TCGATTCTCCCC-GATATACCTCACCACTTCTAGCCTA--TCAGCCTGT  
ATACCTCCGTCGTAAGCTTACCATATGAACGCT-TTTTAGTGAGCTAAAAGAT--TTTAC  
ATAAATACGTCAGGTCAAGGTGCAGCCCACGAAGTGGAAAGAAATGGGCTACAATTTCTA  
AAA--TAGAACACAACGAAAGACTACATGCAA-CTTAGTCATGAAGGCGGATTTAGTAG  
TAAAAGAAAATAGAGCGTTCTTTTTAATTAGGCGCTGGGACGCGTACACACCGCCCGTC  
ACCCTCTTCAAACGCTTTA--TCAAG-TTTATAACAAC-ACTACGCATTACAGAAGAGGT  
AAGTCGTAACACGGTAAGCGTACTGGAAAGTGCCTTGGACAAA-CAAAATGTAGCTTAA  
TCAA-GCATCTCGCTTACACCGAGAACATATCTGTGATACCCGGATCATTTTGA--GCT  
AAAACTTAGCTTTA--CTTCTCTCCAATGTTACACC-GTACCTC--AAACAA--CAAAA  
TAAAACATTTTACAT-ATAAAGTAAAGGCGATTAAAAAATATCTT-AAAGCTATAAAA-C  
AAGTACCGCAAGGGAATAGTGAAATAATAATGAAAAA---CTAAAGCACATAAAAAGCAGA  
GACTCAACCTCGTACCTTTTGCATCATGGTCTAACTAGTCCCTTCGAGCAAAATGAGTTT  
TAAGTTTGATCCCCGAAACTAGGTGAGCTACTTAAAAACAGCCTTCT-GGGCCAACCCG  
TCTCTGTTGCAAAAGAGTGGAAGATTTTTTAAGTAGAGGTGATAAACCTACCGAACCTA  
GAGATAGCTGGTTATTCAGGAAAAGGATTTAAGTCTACCTTAGGTTTTTT-GTATA--T  
ACAAGTACCACATC-AA-----  
-----AGCAG  
CCACCTTT-AAGAAAGCGTTAAAGCTTCATTA---TATCTTATAAAAA-TTCCACTA-AT  
TTTCTAAAACCCTT-AACCT-GTACTGAATGGTCTCATGACTTCATGAGAGTCTATATGT

TAGAACTAGTAACAAGAAGA-AGCCCTTCTCCA-AAATGTAAGCATGAGCCAAAATGAAC  
TATTCATTGGCATTAAAGTTAATAATCTTCTAGTAGTAACTAT----TCAAGAAAAATC  
TAC-----TATACTT-AACGTCAACCTTACACCAGCACATTTCTGGA  
AAGATTAAGACTAGGAAGGAAGCTCGGCAAACAA-TTAACCCCGCCTGTTTACCAAAAA  
CATCGCCTCCTGATTTCT----ATAGGAGGTCTAGCCTGCCAGTGACAAA--GTAAAC  
GGCCGCGGTACCCTAACCGTGCAAAGGTAGCGCAATCACTTGTTCTTTAAATGAGGACTA  
GTATGAACGGCATCACGAGGGTTATGCTGTCTCCCTACTTTATTTCAGTGAAACTGATCTC  
CCCGTGAAGAAGCGGAATAAAAATATAAGACGAGAAGACCCCATGGAGCTTTAAACTCA  
GTATCAACTGCTATTAT--TAAAACCTAATACACAA-GCAATCTCTGAC-TACTAGTTTT  
CGGTTGGGGTGACCACGGAGTAAAACCTAACCTCCACGATGAAAGGAAATAACAACCTAA  
ATTAAGAGCTACAACCTCTAAATATCAAT-----AAATTGACTGA--TTGATCCAATT  
AATT--GATCAACGAACCAAGTTACCCTGGGGATAACAGCGCAATCCATTTCAAGAGCTC  
CTATCGACAAATGGGTTTACG-ACC-TCGATGTTGGATCAGGGTATCCCAGTG-GCGCAG  
CTGCTA-CTAA-TGGTTC

>M. heymonsi MN534681, MN534473, MN534574

TTATTATCAACTTTTTCTTGATTTACACATGCAAGTATCAGCACACCCGTGAGAACGCC  
TTCACCCTT-CATAGGACAAGGAGCTGGTATCAGGCTCAG---TCT-----TCTAGCCC  
ATAACACCTAGCTTTACCACACCCTCAAGGGTATTTCAGCAGTGATTAACATTGTATATAA  
GCGCCAGCTTGACTCAGTTAAAGAACCC--AGAGCCGGCTAATACGGTGCCAGCCGCCG  
GGCTACACCGCTAGGCTCAAGTTGATATT-AATCGGCGTTAAGCGTGTTTAAAGTGCAC-  
AAAA--ATTAGAATTAACTTAAACCGAGCTGTGACACGCTTGTTTTTAAGAAAAACAAA  
AACGAAAGTTATTCTAACCAAAACCACTTGAACCCACGACAGCTAGGACACAACTGGGAT  
TAGGTACCCCACTATGCCTAGCCGTAAAAATTTTATTTACACCT-TTAACCGCCCGGGAA  
TTACGAGCCCAAGCTTAAAACCCAAAGGACTTGACGGTGCCCCACCCACCTAGAGGAGCC  
TGTTCTATAA-TCGATTCCCCC-GATATACCTCACCACTTCTAGCCTA--TCAGCCTGT  
ATACCTCCGTCGTAAGCTTACCATATGAACGCT-TTTTAGTGAGCTAAAAGAT-TTTTAC  
ATAAATACGTCAGGTCAAGGTGCAGCCCACGAAGTGGTAAGTAATGGGCTACAATTTCTA  
AAA---TAGAACATA-CGAAAGACTACATGCAA-TTTAGTCATGAAGCGGATTTAGTAG  
TAAAAAGAAAATAGAGTGTCTTTTTTAATTAGGCGCTGGGACGCGTACACACCGCCCGTC  
ACCCTCTTCAAACGCTTTA--TCAAG-TTTATAACAAT-ATTATGCATAACAGAAGAGGT

AAGTCGTAACATGGTAAGCGTACTGGAAAAGTGCCTTGGATAAA-CAAAATATAGCTTAA  
TCAAA-GCATCTCGCTTACACCGAGAATATATCTGTGATACCCAGATTATTTTGA--GCC  
AAAAACTTAGCTTTA--ACTCTCCCAATATTCACCC-GCACCAA--AAACAA--CAAAA  
TAAACATTTTACAC-ATTAAGTAAAGGCGATTAAAAAATGTCTT-AAAGCTATAAAA-C  
AAGTACCGCAAGGGAATAGTGAAATAATAATGAAAAA---CTAAAGCACATAAAAAGCAGA  
GCCTTAACCTCGTACCTTTTGCATCATGGTCTAACTAGTCCCCTCGAGCAAAATGAGTTT  
TAAGTTTGATCCCCGAAACTAGGTGAGCTACTTAAAAACAGCCTTCT-GGGCCAACCCG  
TCTCTGTTGCAAAGAGTGGGAAGATTTT-TAAGTAGAGGTGATAAACCTACCGAACCTA  
GAGATAGCTGGTTATTCAGGAAAAGGATTTAAGTCCTACCTTAGGTTTTTT-GTACA-AT  
ATAAGTACCCCCACCAACCCTTA-----  
-----AGCAG  
CCACCTTT-AAAAAGCGTTTAAGCTTCATTG---TATTTTATAAAAAATTTCCACTA-AT  
TTTCTAAAACCTTTAACCT-GTACTGAATGGTCTTATGACTTCATAAGAGCCTATATGT  
TAGAACTAGTAACAAGAAGA-AGCCCTTCTCCA-AAATGTAAGCATGAACCAAATGAAC  
TATTCATTGGCATTAAAGTTAATAATCTTCTAGTAGTAACTAC---TCAAGAAAACC  
TAC-----TATATTT-AACGTCAACCTTACACCAGCACATTCTGGA  
AAGATTAAGACTAGGAAGGAACTCGGCAAACAA-ATAACCCCGCCTGTTTACCAAAAA  
CATCGCCTCCTGATTTTT---ATAGGAGGTCTAGCCTGCCAGTGACAAA--GTAAAC  
GGCCGCGGTACCCTAACCGTGCAAAGGTAGCGCAATCACTTGTTCTTTAAATGAGGACTA  
GTATGAACGGCATCACGAGGGTTATGCTGTCTCCCTACTTTATTCAGTGAAACTGATCTC  
CCCGTGAAGAGGCGGGGATAAAAAATATAAGACGAGAAGACCCCATGGAGCTTTAAACTCA  
GTGTCAACTGCCATATT--TAAACCTAATATTTCAA-GCAAGTTATGAC-TACTAGTTTT  
CGGTTGGGGTGACCACGGAGTAAACCTAACCTCCACGATGAAAGGAAATAGCAACCTAA  
ATTAAGAGCTACAGCTCTAAATATCAAT-----AAATTGACTTA--TTGACCCAATT  
AATT--GATCAACGAACCAAGTTACCCTGGGGATAACAGCGCAATCCATTTCAAGAGCTC  
CTATCGACAAATGGGTTTACG-ACC-TCGATGTTGGATCAGGGTATCCCAGTG-GCGCAG  
CCGCTA-CTAA-TGGTTC

>M. heymonsi MN534682, MN534474, MN534575

TTATAATCAACTTCTTCTTGATTTACACATGCAAGTATCAACACACCCGTGAGAACGCC  
TTTACCCTT-TATAGGACAAGGAGCTGGTATCAGGCTCAG---TCT-----TCTAGCCC

ATAACACCTAGCTTTGCCACACCCTCAAGGGTATTCAGCAGTGATTAACATTGTTTCATAA  
GCGCCAGCTTGACTCAGTCAAAGAACCT--AGAGCCGGCCAATACGGTGCCAGCCGCCGC  
GGCTACACCGCTAGGCTCAAGTTGATATT-AATCGGCGTTAAGCGTGTTTAAAGTATGT-  
AAAA-GATTAGAATTAACCTTAAACCAAGCTGTGACACGCTTGTTCTTAAGAAAAACAAA  
AACGAAAGTTATTCCTAACTAAACCACTTGAACCCACGATAGCTAGGACACAACTGGGAT  
TAGGTACCCCACTATGCCTAGCCGTAAAATATTTATTTACACCT-TAAACCGCCAGGGAA  
TTACGAGCCCAAGCTTAAACCCAAAGGACTTGACGGTGCCCCACCCACCTAGAGGAGCC  
TGTTCTATAA-TCGATTCTCCCC-GATATACCTCACCCTTCTAGCCTA--TCAGCCTGT  
ATACCTCCGTCGTAAGCTTACCATATGAACGCT-TTTTAGTGAGCTAAAAGAT--TTTAC  
ATAAATACGTCAGGTCAAGGTGCAGCCCACGAAGTGGTAAGTAATGGGCTACAATTTCTA  
GAA--TAGAACATAACGAAAGACTATATGCAA-CTTAGTCATGAAGGCGGATTTAGTAG  
TAAAAGAAAATAGAGCGTCTTTTTAATCAGGCGCTGGGACGCGTACACACCGCCCGTC  
ACCCTCTTCAAACGCTTTA--TCAAG-TTTATAACAAC-ATTATGCACTACAGAAGAGGT  
AAGTCGTAACACGGTAAGCGTACTGGAAAGTGCAGCTTGGATAAA-CAAATGTAGCTTAA  
TCAA-GCATCTCGCTTACACCGAGAACATATCTGTGATACCCGGATCATTTTTGA--GCT  
GATAACTTAGCTTTA--CTTCTCTCAAATGTCCACTC-TTACCTA--AGAAAA--CAAAA  
TAAAACATTTTACAC-ATTAAGTAAAGGCGATTAAAAAATGTCTT-AAAGCTATAAAA-C  
AAGTACCGCAAGGGAACAGTGAAATAATAATGAAAA----CTAAAGCACATAAAAGCAGA  
GCCTTAACCTCGTACCTTTTGCATCATGGTCTAACTAGTCTCCTCGAGCAAATGAGTTT  
TAAGTTTGATCCCCGAAACTAGGTGAGCTACTTAAAAACAGCCTTCT-GGGCCAACCCG  
TCTCTGTTGCAAAAGAGTGGGAAGATTTTTTAAGTAGAGGTGATAAACCTACCGAACCTA  
GAGATAGCTGGTTATTCAGGAAAAGGATT-----  
-----  
-----AGCAG  
CCACCTTT-AAAAAGCGTTAAAGCTTCATTA---TATTTTGTA AAAA-TTCCACTA-AT  
TTTCTAAAACCCTT-AACCT-GTACTGAATGGTCTCATGACTTCATGAGAGCCTATATGT  
TAGAACTAGTAACAAGAAGA-AGCCCTTCTCCA-AAATGTAAGCATGAGCCAAAATGAAC  
TATTCATTGGCATTAAAGTTAATAATTCCTAGTAGTAACTTT---TTCAAGAAAAACC  
TAC-----TATATTC-AACGTCAACCTTACACCAGCACATTTCTGGA  
AAGATTA AAAGACTAGGAAGGAACTCGGCAAACAA-TTAACCCCGCCTGTTTACCAAAAA

CATCGCCTCCTGATTATT----ATAGGAGGTCTAGCCTGCCAGTGACAAA--GTTAAAC  
GGCCGCGGTACCCTAACCGTGCAAAGGTAGCGCAATCACTTGTTCTTTAAATGAGGACTA  
GTATGAACGGCATCACGAGGGTTATGCTGTCTCCCTACTTTATTTCAGTGAAACTAATCTC  
CCCGTGAAGAAGCGGGGATAAAAATATAAGACGAGAAGACCCCATGGAGCTTTAAACTCA  
GTATCAACTGCCATAAT--TAAAACCTTAATATTTCAA-GCAATTTCTGAT-AACTAGTTTT  
CGGTTGGGGTGACCACGGAGTAAAACCTAACCTCCATGATGAAAGGAAATAATAACCTAA  
ATTAAGAGCTACAGCTCTAAATATCAAT-----AAATTGACTAA--TTGACCCAATT  
ATTT--GATCAACGAACCAAGTTACCCTGGGGATAACAGCGCAATCCATTTCAAGAGCTC  
TTATCGACAAATGGGTTTACG-ACC-TCGATGTTGGATCAGGGTATCCCAGTG-GCGCAG  
CCGCTA-CTAA-CGGTTC

>M. heymonsi MN534683, MN534475, MN534576

TTATTATCAACTTTTTCTTGATTTACACATGCAAGTATCAGCACACCCGTGAGAACGCC  
TTTACCCTT-TATAGGATAAGGAGCTGGTATCAGGCTCAG---TCT-----TCTAGCCC  
ATAACACCTAGCTTTGCCACACCCTCAAGGGTATTCAGCAGTGATTAACATTGTATATAA  
GCGCCAGCTTGACTCAGTCAAAGAACCT--AGAGCCGGCTAATACGGTGCCAGCCGCCGC  
GGCTACACCGCTAGGCTCAAGTTGACATT-AATCGGCGTTAAGCGTGTTTAAAGTGCAC-  
TAAAA-ATTAGAATTAAACTTAAACCAAGCTGTGACACGCTTGTTTTTAAGAAAAACAAA  
AACGAAAGTTATTCTAACCAACCACTTGAACCCACGACAGCTAGGGCACAACTGGGAT  
TAGGTACCCCACTATGCCTAGCCGTAAAATATTTATTTACACCT-TAAACCGCCTGGGAA  
TTACGAGCCCAAGCTTAAAACCCAAAGGACTTGACGGTGCCCCACCCACCTAGAGGAGCC  
TGTTCTATAA-TCGATTCTCCCC-GATATACCTCACCCTTCTAGCCTA--TCAGCCTGT  
ATACCTCCGTCGTAAGCTTACCATATGAACGCT-TTTTAGTGAGCTAAAAGAT--TTTAC  
ATAAATACGTCAGGTCAAGGTGCAGCCCACGAAGTGGTAAGTAATGGGCTACAATTTCTA  
AAA---TAGAACACAACGAAAGACTATATGCAA-CTTAGTCATGAAGGCGGATTTAGTAG  
TAAAAAGAAAATAGAGCGTTCTTTTTAATTAGGCACTGGGACGCGTACACACCGCCCGTC  
ACCCTCTTCAAACGCTTTA--TCAAG-TTTATAACAAT-TTTATGCATCACAGAAGAGGT  
AAGTCGTAACACGGTAAGCGTACTGGAAAGTGTGCTTGGATAAA-CAAATGTAGCTTAA  
TCAA-GCATCTCGCTTACACCGAGAATATATCTGTGATACCCGGATCATTTTGA--GCT  
AAAAACTCAGCTTTA--CTTCTCCCAATGTTACCC-GTTCCTT--AAACAA--CAAAA  
TAAAACATTTTATAC-ATTAAGTAAAGGCGATTA AAAAATGTCTT-AAAGCTATAAAA-C

AAGTACCGCAAGGGAATAGTGAAATAATAATGAAAA----CTAAAGCACGTAAAAGCAGA  
GCTTTAACCTCGTACCTTTTGCATCATGGTCTAACTAGTCCCCTCGAGCAAATGAATTT  
TAAGTTTGATCCCCGAAACTAGGTGAGCTACTTAAAAACAGCCTTCT-GGGCCAACCCG  
TCTCTGTTGCAAAAGAGTGGGAAGATTTTTTAAGTAGAGGTGACAAACCTACCGAACCTA  
GAGATAGCTGGTTATTC-----  
-----  
-----AGCAG  
CCACCTTTT-AAAAAGCGTTAAAGCTTCATTGC--GTAATATAAAAAATTTCCACTA-AT  
TTTCTAAAACCCCTAACCT-GTACTGAATGGTCTTATGACTTCATAAGAGCCTATATGT  
TAGAACTAGTAACAAGAAGA-AGCCCTTCTCCA-AAATGTAAGCATGAGCCAAAATGAAC  
AATTCATTGGCATTAAAGTTAATAATCTTCTAGTAGTAACTAT----TCAAGAAAAACC  
TAC-----TATATCT-AACGTCAACCTTACACCAGCACATTTCTGGA  
AAGATTAAGATTAGGAAGGAAGTTCGGCAAACAA-ATAACCCCGCCTGTTTACCAAAAA  
CATCGCCTCCTGATTTTT-ATAGGAGGTCTAGCCTGCCAGTGACAAA--GTAAAC  
GGCCGCGGTACCCTAACCGTGCAAAGGTAGCGCAATCACTTGTTCTTTAAATGAGGACTA  
GTATGAACGGCATCACGAGGGTTATGCTGTCTCCCTACTTTATTCAGTGAAACTGATCTC  
CCCGTGAAGAGGCGGGGATAAAAAATATAAGACGAGAAGACCCCATGGAGCTTTAAACTCA  
GTATCAACTGCCATATT--TAAACCTAATATTCAA-GCAATTTCTGAC-TACTAGTTTT  
TGGTTGGGGTGACCACGGAGTAAACCTAACCTCCATGATGAAAGGAAATAACAACCTAA  
ATCAAGAGCTACAGCTCTAAATATCAAT-----AAATTGACTGA--TTGATCCAATT  
AATT--GATCAACGAACCAAGTTACCCTGGGGATAACAGCGCAATCCATTTCAAGAGCTC  
CTATCGACAAAATGGGTTTACG-ACC-TCGATGTTGGATCAGGGTATCCCAGTG-GCGCAG  
CCGCTA-CTAA-CGGTTC

>M. heymonsi MN534684, MN534476, MN534577

TTATTATCAGCTTTTTCTTAACTTACACATGCAAGTATCAGCAAACCCGTGAGAACGCC  
TTTACCCTT-TATAGGACAAGGAGCTGGTATCAGGCTCAG---TCT-----TCTAGCCC  
ATAACACCTAGCTTTGCCACACCCTCAAGGGTACTCAGCAGTGATTAACATTGTTTATAA  
GCGCCAGCTTAAATCAGTCAAAGAATCT--AGAGCCGGCTAATACGGTGCCAGCCGCCGC  
GGCTACACCGCTAGGCTCAAGTTGATATT-AATCGGCGTTAAGCGTGTTTAAAGTGCAC-  
AAAA-GATTAGAATTAACCTTAAACCAAGCTGTGACACGCTTGTTCCTTAAGAAAAACAAA

AACGAAAGTTATTCTAACCAAACCACTTGAACCCACGACAGCTAAGACACAAACTGGGAT  
TAGGTACCCCACTATGCCTAGCCGTAAAAATATTTATTTACACCT-TTAACCGCCCGGAA  
TTACGAGCCCAAGCTTAAAACCAAAGGACTTGACGGTGCCCCACCCACCTAGAGGAGCC  
TGTTCTATAA-TCGATTCTCCCC-GATATACCTCACCCTTCTAGCCTA--TCAGCCTGT  
ATACCTCAGTCGTAAGCTTACCATATGAACGCT-TTTTAGTGAGCTAAAAGAT--TTTAC  
ATAAACACGTCAGGTCAAGGTGCAGCCCACGAAGTGGTAAGTAATGGGCTACAATTTCTA  
AAA---TAGAACACAACGAAAGACTACATGCAA-CTTAGTCATGAAGCGGATTTAGAAG  
TAAAAAGAAAATAGAGCGTTCCTTTTTAATCAGGCGCTGGGACGCGTACACACCGCCCGTC  
ACCCTCTTCAAACGCTTCA--TCAAG-TTTATAACAAT-ATTTTGCCTACAGAAGAGGT  
AAGTCGTAACATGGTAAGCGTACTGGAAAGTGCCTTGGATAAA-CAAATGTAGCTTAA  
CCAAA-GCATCTCGCTTACACCGAGAATATATCTGTGACACCCAGATCATTTTTGA--GCT  
AAAACTTAGCTTTA--CTTCCCCCAATGTTTACCCTAATTCTT---AACAA--TAAAA  
TAAAACATTTTATAC-ATTAAGTAAAGGCGATTAAAAAATGTCTT-AAAGCTATAAAA-C  
AAGTACCGCAAGGGAACAGTGAAATAACAATGAAAA---TTAAAGCATATAAAAGTAGA  
GCTTCAACCTCGTACCTTTTGCATCATGGTCTAACTAGTCCCCTCAAGCAGAATGAATTT  
TAAGTTTGACCCCCGAAACTAAGTGAGCTACTTAAAAACAGCCTTCT-GGGCCAACCCG  
TCTCTGTTGCAAAAGAGTGGAAGATTTT-TAAGTAGAGGTGACAAACCTACCGAACCTA  
GAGATAGCTGGTTATTTCAGGAAAAGGATTTAAGTCCTACCTTAGGTTTTT--GTACA-AC  
ACAAGTAACCCAA--AACCTTAAGAGCTATTCAAATAAGGTACAGCCTATTTGAAACAGG  
ATACAACCTCAC-----AGCAG  
CCACCTTT--AAAAGCGTTAAGCTTCATTT---GTTATTATAAAAA--TCCTTAAAT  
TTTCTACAACCCTT-AATCT-GTACTGAATGATCTCATGACTTCATGAGAGCCTATATGT  
TAGAACTAGTAACAAGAAGAAAGCACTTCTCCA-AAATGTAAGCATGAGCCAAAATGAAC  
TATTCATTGGCATTAAAGTTAATAAATCCCTAGTAGTTAACTA---TTCAAGAAAAACC  
TACT-----TATATAT-GACGTCAACCTTACACCAGCCATTTCTGGA  
AAGATTAAAAAACTAGGAAGGAACCTCGGCAAATAA-CTAACCCCGCCTGTTTACCAAAAA  
CATCGCCTCCTGATTTCT---ATAAGAGGTCTAGCCTGCCAGTGACAAA--GTTAAAC  
GGCCGCGGTACCCTAACCGTGCAAAGGTAGCGCAATCACTTGTTCTTTAAATGAGGACTA  
GTATGAACGGCATCACGAGGGTTATGCTGTCTCCCTACTTTATTTCAGTGAAACTAATCTC  
CCCGTGAAGAAGCGGGGATAAAAAATATAAGACGAGAAGACCCCATGGAGCTTTAAACTCA



GTATCAACTGCCATTAT--TAAACCTTATACCCAA-GCAGTCTATGAC-TACTAGTTTT  
CGGTTGGGGTGACCACGGAGTAAATCTAACCTCCATGATGAAAGGAACTAAAAACCTAA  
ATTAAGGGCTACAACCCTACATATCATA-----AAATTGACTAA--TTGATCCAATT  
AATT--GATCAACGAACCAAGTTACCCTGGGGATAACAGCGCAATCCATTTCAAGAGCTC  
TTATCGACAAATGGGTTTACG-ACC-TCGATGTTGGATCAGGGTATCCCAGTG-GCGCAG  
CCGCTA-CTAA-----

>M. heymonsi MN534685, MN534477, MN534578

TTATTATCAGCTTTTTCTTAACTTACACATGCAAGTATCAGCAAACCCGTGAGAACGCC  
TTTACCCTT-TATAGGACAAGGAGCTGGTATCAGGCTCAG---TCT-----TCTAGCCC  
ATAACACCTAGCTTTGCCACACCCTCAAGGGTACTCAGCAGTGATTAACATTGTTTATAA  
GCGCCAGCTTAAATCAGTCAAAGAATCT--AGAGCCGGCTAATACGGTGCCAGCCGCCGC  
GGCTACACCGCTAGGCTCAAGTTGATATT-AATCGGCGTTAAGCGTGTTTAAAGTGCAC-  
AAAA-GATTAGAATTAACTTAAACCAAGCTGTGACACGCTTGTCTTAAGAAAAACAAA  
AACGAAAGTTATTCTAACCAACCCTTGAACCCACGACAGCTAAGACACAACTGGGAT  
TAGGTACCCACTATGCCTAGCCGTAAAATATTTATTTACACCT-TTAACCGCCCGGAA  
TTACGAGCCCAAGCTTAAACCCAAAGGACTTGACGGTGCCCCACCCACCTAGAGGAGCC  
TGTTCTATAA-TCGATTCCCCC-GATATACCTCACCCTTCTAGCCTA--TCAGCCTGT  
ATACCTCCGTCGTAAGCTTACCATATGAACGCT-TTTTAGTGAGCTAAAAGAT--TTTAC  
ATAAACACGTCAGGTCAAGGTGCAGCCCACGAAGTGGTAAGTAATGGGCTACAATTTCTA  
AAA--TAGAACACAACGAAAGACTACATGCAA-CTTAGTCATGAAGGCGGATTTAGAAG  
TAAAAGAAAATAGAGCGTTCTTTTTAATCAGGCGCTGGGACGCGTACACACCCGCCCGTC  
ACCCTCTTCAAACGCTTCA--TCAAG-TTTATAACAAT-ATTTTGCACTACAGAAGAGGT  
AAGTCGTAACATGGTAAGCGTACTGGAAAGTGCGCTTGGATAAA-CAAATGTAGCTTAA  
CCAAA-GCATCTCGTTACACCGAGAATATATCTGTGACACCCAGATCATTTTGA--GCT  
AAAACTTAGCTTTA--CTTCCCCCAATGTTTACCCTAATTCTT---AACAA--TAAAA  
TAAAACATTTTATAC-ATTAAGTAAAGGCGATTA AAAAATGTCTT-AAAGCTATAAAA-C  
AAGTACCGCAAGGGAACAGTGAAATAACAATGAAAA---TTAAAGCATATAAAAAGTAGA  
GCTTCAACCTCGTACCTTTTGCATCATGGTCTAACTAGTCCCCTCAAGCAGAATGAATTT  
TAAGTTTGACCCCCGAACTAAGTGAGCTACTTAAAAACAGCCTTCT-GGGCCAACCCG  
TCTCTGTTGCAAAAGAGTGGGAAGATTTT-TAAGTAGAGGTGATAAACCTACCGAACCTA

GAGATAGCTGGTTATTTCAGGAAAAGGATTTAAGTCCTACCTTAGGTTTTT--ATACA-AC  
ACAAGTAACCCAA--AACCTTAAGAGCTATTCAAATAAGGTACAGCCTATTTGAAACAGG  
ATACAACCTCA-----AGCAG  
CCACCTTT-AAAAAAGCGTTTAAGCTTCATTT---GTTATTATAAAAA--TCCTTAAATT  
TTTCTACAACCCTT-AATCT-GTACTGAATGATCTCATGACTTCATGAGAGCCTATATGT  
TAGAACTAGTAACAAGAAGAAAGCACTTCTCCA-AAATGTAAGCATGAGCCAAAATGAAC  
TATTCATTGGCATTAAAGTTAATAAATCCCTAGTAGTAACTA---TTCAAGAAAACC  
TACT-----TATATAT-GACGTCAACCTTACACCAGCCATTTCTGGA  
AAGATTAAAAAACTAGGAAGGAACTCGGCAAATAA-CTAACCCCGCCTGTTTACCAAAAA  
CATCGCCTCCTGATTTCT----ATAAGAGGTCTAGCCTGCCAGTGACAAA--GTTAAAC  
GGCCGCGGTACCCTAACCGTGCAAAGGTAGCGCAATCACTTGTTCTTTAAATGAGGACTA  
GTATGAACGGCATCACGAGGGTTATGCTGTCTCCCTACTTTATTTCAGTGAAACTAATCTC  
CCCGTGAAGAAGCGGGGATAAAAAATATAAGACGAGAAGACCCCATGGAGCTTTAAACTCA  
GTATCAACTGCCATTAT--TAAAACCTTATACCCAA-GCAGTCTATGAC-TACTAGTTTT  
CGGTTGGGGTGACCACGGAGTAAATCTAACCTCCATGATGAAAGGAACTAAAAACCTAA  
ATTAAGGGCTACAACCCTACATATCATA-----AAATTGACTAA--TTGATCCAATT  
AATT--GATCAACGAACCAAGTTACCCTGGGGATAACAGCGCAATCCATTTCAAGAGCTC  
TTATCGACAAAATGGGTTTACG-ACC-TCGATGTTGGATCAGGGTATCCCAGTG-GCGCAG  
CCGCTA-CTAA-CGGTTC

>M. heymonsi MN534686, MN534478, MN534579

TTACTATCAACTTTTTCTTGACTTACACATGCAAGTATCAGCAAACCCGTGAGAACGCC  
TTTACCCTT-TATAGGACAAGGAGCTGGTATCAGGCTCAG---TCT-----TCTAGCCC  
ATAACACCTAGCTTTGCCACACCCTCAAGGGTACTCAGCAGTGATTAACATTGTTTATAA  
GCGCCAGCTTGAATCAGTTAAAGAACCT--AGAGCCGGCTAATACGGTGCCAGCCGCCGC  
GGCTACACCGCTAGGCTCAAGTTGATATT-AATCGGCGTTAAGCGTGTAAAGTGAAC-  
AAAA-GATTAGAATTGAACTTAAACCAAGCTGTGACACGCTTGTTTTTAAGAAAAACAAA  
AACGAAAGTTATTCTAACCAACCCTTGAATCCACGACAGCTAGGACACAACTGGGAT  
TAGGTACCCCACTATGCCTAGCCGTAAAATATTTACTTACACCT-TTAACCGCCCGGAA  
TTACGAGCCCAAGCTTAAACCCAAAGGACTTGACGGTGCCCCACCCACCTAGAGGAGCC  
TGTTCTATAA-TCGATTCTCCCC-GATATACCTCACCCTTCTAGCCTA--TCAGCCTGT

ATACCTCCGTCGTAAGCTTACCATATGAACGCT-TTTTAGTGAGCCAAAAGAT--TTTAC  
ATAAACACGTCAGGTCAAGGTGCAGCCCACGAAGTGGTAAGTAATGGGCTACAATTTCTA  
AAA--TAGAACACA-CGAAAGACTATATGCAA-CTTGGTCATGAAGGCGGATTTAGAAG  
TAAAAAGAAAATAGAGTGTTCTTTTTAATTAGGCGCTGGGACGCGTACACACCGCCCGTC  
ACCCTCTTCAAACGCTTCA--TCAAG-TTTATAACAAT-ATTATGCACTACAGAAGAGGT  
AAGTCGTAACACGGTAAGTGACTGGAAAGTGCACTTGGATAAA-CAAATGTAGCTTAA  
TCAA-GCATCTCGCTTACACCGAGGATATATCTGTGATACCCGGATCATTTTGA--GCT  
AAAACTTAGCTTTA--CTTCTCTCCAATGTTTACCCTAAT-CTT--AAACAA--TAAAA  
TAAACATTTTACAC-ATTTAGTAAAGGCGATTAAAAAATGTCTT-AAAGCTATAAAA-C  
AAGTACCGCAAGGGAACAGTGAAATAATAATGAAAA----CTAAAGCACATAAAAAGCAGA  
GCCTCAACCTCGTACCTTTTGCATCATGGTCTAACTAGTCCCCTCAAGCAGAATGAACTT  
TAAGTTTGACCCCCGAAACTAAGTGAGCTACTTAAAAACAGCCTTCT-GGGCCAACCCG  
TCTCTGTTGCAAAGAGTGGAAGATTCT-TAAGTAGAGGTGATAAACCTACCGAACTTA  
GAGATAGCTGGTTATTTCAGGAAAAGGATTTAAGTCCTACCTTAGGTTTTT--ATACA-AC  
ATAAGTACCTCAA--AACCTTAAGAGCTATTCAAATAAGGTACAGCCTATTTGAAACAGG  
ATACAACCTCACCA-----  
-----  
-----  
-----  
-----  
-----  
-----  
-----  
-----  
-----  
-----  
-----GAGGTCTAGCCTGCCAGTGACAAA--GTTAAAC  
GGCCGCGGTACCGTAACCGTGCAAAGGTAGCACATTCACTTGTCTTTAAATGAGGACTG  
GTATGAACGGCATCACGAGGGTTATGCTGTCTCCCTACTTTATTTCAGTGAAACTAATCTC  
CCCGTGAAGAAGCGGGATAAAAATATAAGACGAGAAGACCCCATGGAGCTTTAAACTCA  
GTATCAACTGCCATAAT--TATAGCCTTATATTCAA-GCAGTCTATGAC-TACTAGTTTT  
CGGTTGGGGTGACCACGGAGTAAAACCTAACCTCCATGATGAAAGGAACTAAAAACCTAA  
ATTAAGGGCTACAACCCTAAATATCATA-----AAATTGACTAA--CTGATCCAATT  
AATT--GATCAACGAACCAAGTTACCCTGGGGATAACAGCGCAATCCATTTCAAGAGCTC

TTATCGACAAATGGGTTTACG-ACC-TCGATGTTGGATCAGGGTATCCAAGTG-GCGCAG  
CCGCTA-CTAA-TGGTTC

>M. mukhlesuri MN534687, MN534479, MN534580

TTATTATCACCTCCCTCTCGACTTACACATGCAAGTTTCAGCACACCCGTGAGAACGCC  
TTCACCCTT-TTTAGGACAAGGAGCTGGTATCAGGCACAG---ATT-----TCTAGCCC  
ATGACACCTAGCTTTGCCACACCCTCAAGGGTCTTCAGCAGTGATTAACATTGTTTATAA  
GCGCCAGCTTGAATCAGTCAGAGAACCA--AGAGCCGGCCAATACGGTGCCAGCCGCCGC  
GGCTACACCGCTAGGCTCAAGTTGATATT-ATTCGGCGTTAAGCGTGTTTAAAGTGCC-  
AAACAGATTAGAATTAAACTTTAACCAAGCCGTGATACGCTTGTTCCTAAGAAAACCACA  
ATCGAAAGTTATTCTAACCAAAACCACTTGAACCCACGACAGCTAGGGAACAACTGGGAT  
TAGGTACCCCACTATGCCTAGCCGTAAAACATTTACTTACACCC-TTAACCGCCCGGGAA  
TTACGAGCCCAAGCTTAAAACCCAAAGGACTTGACGGTGTCCACCCACCTAGAGGAGCC  
TGTTCTATAA-TCGATTCCCCC-GATCTACCTCACCATTTCTAGCCTT--TCAGCCTGT  
ATACCTCCGTCGTAAGCTTACCATATGAACGTT-TCTAAGTGAGCTAAAAGAT-TTCCTC  
GTAAATACGTCAGGTCAAGGTGCAGCCACGAAATGGCAAGCAATGGGCTACAATTTCTA  
CTA---TAGAACATAACGAAAGACTACATGCAA-CTTAGTCATGAAGGCGGATTTAGCAG  
TAAAAGAAAGTAGAGAGTTCTTTTTAATTAGGCGCTGGGACGCGTACACACCGCCCGTC  
ACCCTCTTCAAACGCTTCA-AATATG-TTTATAACACT-TTTATGCATCACAGAAGAGGT  
AAGTCGTAACATGGTAAGTGTAAGTGGAAAAGTGCACTTGGATTAA-CAAAATGTAGCTTAA  
CTAAA-GCATCTCGCTTACACCGAGAACATGTCCGTGAAACTCAGATCATTTTGA--GCT  
GAAAACCTAGCTTAC--TCCATTCT-TATGAATATAC-CACCTTAA-CACATA--CTAAA  
TAAAACATTTTGTAC-ATTAAGTAAAGGCGATTAAAAAATGTCTT-AAAGCTATAGAAAT  
TAGTACCGCAAGGGAAAAGTGAAATATTAATGAAAA--CCTCAAGCACAAAAAAGTAGA  
GCTACAACCTCGTACCTTTTGCATCATGGTCTAACTAGTTCAACCAAGCAAAATGAATTT  
TAAGTTTGACTTCCCGAAACTAGGTGAGCTACTTAAAAACAGCCTTAC-GGGCCAACCCG  
TCTCTGTTGCAAAAGAGTGGAAGATTTT-TAAGTAGAGGTGACAGACCTACCGAACCTA  
GAGATAGCTGGTTATTCAGGAAAAGGATTTAAGTCTACCTTAAGTTTATT-GTATA-AA  
A-TAATACACAACCT-AACTT-----  
-----  
-----TAC-AAAAAGCGTTAAAGCTTCATTG---TTTTTATCAAAAA-TACCATTA-AT

TAACTGTAACCCTT-CACCG-GTACTGAATGATCTCATAGTGGTATGAGAGCCTATATGT  
TAGAACTAGTAACAAGAAGA-AGCCCTTCTCCA-AAATGTAAGCATGAGCCAAAATGAAC  
TATTCACCTGGCACTTAAAGTTA-TAAACCTATTGTAGCAACTTA----ACAAGAAAAACC  
TAC-----A-ACTGCA-AACGTCAACCTTACACCAGCACATTTCTGGA  
AAGATAAAAAGAATAGGAAGGAACTCGGCAAATAA-CTAACCCCGCCTGTTTACCAAAAA  
CATCGCCTCCTGATCACCC---ATAGGAGGTCCAGCCTGCCAGTGACTAA--GTTAAAC  
GGCCGCGGTACCCTAACCGTGCAAAGGTAGCGCAATCACTTGTTCTTTAAATGAGGACTA  
GTATGAACGGCATCACGAGGGTTATGCTGTCTCCCTACTCTACTCAGTGAAACTGATCTC  
CCCGTGAAGAAGCGGGATAAAAATATAAGACGAGAAGACCCCATGGAGCTTTAAACTCA  
GTACCAACTGCCCAAAT--AATAGCCTATTACCCCT-GCAG-CTATGGT-TACTAGTTTT  
CGGTTGGGGTGACCACGGAGTAAAATTTAACCTCCACGATGAAAGGAACTAATATCCTAA  
CCTATGAGCTACAGCTCTAAGTATCAAC-----AAATTGACTAA--TTGACCCAATT  
ACTT--GATCAACGAACCAAGTTACCCTGGGGATAACAGCGCAATCCATTTCAAGAGCTC  
ATATCGACAAATGGGTTTACG-ACC-TCGATGTTGGATCAGGGTATCCCAGTG-GCGCAG  
CCGCTA-CTAA-CGGTTC

>M. mukhlesuri MN534688, MN534480, MN534581

TTATTATCACCTCCCTCTCGACTTACACATGCAAGTTTCAGCACACCCGTGAGAACGCC  
TTCACCCTT-TTTAGGACAAGGAGCTGGTATCAGGCACAG---ATT-----TCTAGCCC  
ATGACACCTAGCTTTGCCACACCCTCAAGGGTCTTCAGCAGTGATTAACATTGTTTATAA  
GCGCCAGCTTGAATCAGTCAGAGAACCA--AGAGCCGGCCAATACGGTGCCAGCCGCCGC  
GGCTACACCGCTAGGCTCAAGTTGATATT-ATTCGGCGTTAAGCGTGTTTAAAGTGCCC-  
AAACAGATTAGAATTAAACTTTAACCAAGCCGTGATACGCTTGTTTCTAAGAAAACCACA  
ATCGAAAGTTATTCTAACCAAACTTGAACCCACGACAGCTAGGGAACAACTGGGAT  
TAGGTACCCCACTATGCCTAGCCGTAAAACATTTACTTACACCC-TTAACCGCCTGGGAA  
TTACGAGCCCAAGCTTAAAACCAAAGGACTTGACGGTGTCCACCCACCTAGAGGAGCC  
TGTTCTATAA-TCGATTCCCCC-GATCTACCTCACCATTTCTAGCCTT--TCAGCCTGT  
ATACCTCCGTTCGTAAGCTTACCATATGAACGTT-TCTAAGTGAGCTAAAAGAT-TTCCTC  
ATAAATACGTCAGGTCAAGGTGCAGCCCACGAAATGGCAAGCAATGGGCTACAATTTCTA  
CTA---TAGAACATAACGAAAGACTACATGCAA-CTTAGTCATGAAGCGGATTTAGCAG  
TAAAAAGAAAGTAGAGAGTTCTTTTTAATTAGGCGCTGGGACGCGTACACACCGCCCGTC

ACCCTCTTCAAACGCTTCA-AATATG-TTTATAACACT-TTTATGCATCACAGAAGAGGT  
AAGTCGTAACATGGTAAGTGTACTGGAAAAGTGCACTTGGATTAA-CAAATGTAGCTTAA  
CTAAA-GCATCTCGCTTACACCGAGAACATGTCCGTGAAACTCAGATCATTTTGA--GCT  
GAAAACCTAGCTTAC--TCCATTCT-TATGAATATAC-CACCCTAA-CACATA--CTAAA  
TAAAACATTTTGTAC-ATTAAGTAAAGGCGATTAAAAAATGTCTT-AAAGCTATAGAAAT  
TAGTACCGCAAGGGAAAAGTGAAATATTAATGAAAA--CCTCAAGCACAAAAAAGTAGA  
GCTACAATCTCGTACCTTTTGCATCATGGTCTAACTAGTTCAACCAAGCAAATGAATTT  
TAAGTTTGACTTCCCGAAACTAGGTGAGCTACTTAAAAACAGCCTTAC-GGGCCAACCCG  
TCTCTGTTGCAAAAGAGTGGAAGATTTTTTAAAGTAGAGGTGACAGACCTACCGAACCTA  
GAGATAGCTGGTTATTTCAGGAAAAGGATTTAAGTCCTACCTTAAGTTTATT-GT-----  
-----  
-----AG  
CCACTTTAC-AAAAGCGTTAAAGCTTCATTG--TTTTTTATCAAAAA-TACCATTA-AT  
TAACTGTAACCCTT-CACCA-GTACTGAATGATCTCATAGTAGTATGAGAGCCTATATGT  
TAGAACTAGTAACAAGAAGA-AGCCCTTCTCCA-AAATGTAAGCATGAGCCAAAATGAAC  
TATTCACTGGCATTAAAGTTA-TAAACCTATTGTAGCAACTTA---ACAAGAAAAACC  
TAC-----AACTGCA-AACGTCAACCTTACACCAGCACATTTCTGGA  
AAGATAAAAAGAATAGGAAGGAACTCGGCAAATAA-CTAACCCCGCCTGTTTACCAAAAA  
CATCGCCTCCTGATCACCC---ATAGGAGGTCCAGCCTGCCAGTACTAA--GTTAAAC  
GGCCGCGGTACCCTAACCGTGCAAAGGTAGCGCAATCACTTGTTCTTTAAATGAGGACTA  
GTATGAACGGCATCACGAGGGTTATGCTGTCTCCCTACTCTACTCAGTGAAACTGATCTC  
CCCCTGAAGAAGCGGGGATAAAAAATATAAGACGAGAAGACCCCATGGAGCTTTAAACTCA  
GTACCAACTGCCCAAAT--AATAGCCTATTACCCCT-GCAG-CTATGGT-TACTAGTTTT  
CGGTTGGGGTGACCACGGAGTAAAATTTAACCTCCACGATGAAAGGAACCTAATATCCTAA  
CCTATGAGCTACAGCTCTAAGTATCAAC-----AAATTGACTAA--TTGACCCAATT  
ACTT--GATCAACGAACCAAGTTACCCTGGGGATAACAGCGCAATCCATTTCAAGAGCTC  
ATATCGACAAATGGGTTTACG-ACC-TCGATGTTGGATCAGGGTATCCCAGTG-GCGCAG  
CCGCTA-CTAA-CGGTTC

>M. mukhlesuri MN534689, MN534481, MN534582

TTATTATCACCTCCCTCTCGACTTACACATGCAAGTTTCAGCACGCCCGTGAGAACGCC

TTCACCCTT-TTTAGGACAAGGAGCTGGTATCAGGCACAG---ATT-----TCTAGCCC  
ATAACACCTAGCTTTGCCACGCCCTCAAGGGTCTTCAGCAGTGATTAACATTGTTTATGA  
GCGCCAGCTTGAATCAGTCAGAGAACCA--AGAGCCGGCCAATACGGTGCCAGCCGCCGC  
GGCTACACCGCTAGGCTCAAGTTGATATT-ATTCGGCGTTAAGCGTGTTTAAAGTGCTC-  
AAACAGATTAGAATTAACCTTTAACCAAGCCGTGATACGCTTGTTTCTAAGAAAACCGCA  
ATCGAAAGTTATTTCTAACCAAACCACTTGAATCCACGACAGCTAGGGAACAACTGGGAT  
TAGGTACCCCACTATGCCTAGCCGTAAAATATTTACTTACACTC-TTAACCGCCCGGAA  
TTACGAGCCCAAGCTTAAAACCAAAGGACTTGACGGTGTCCCACCCACCTAGAGGAGCC  
TGTTCTATAA-TCGATTCCCCC-GATCTACCTCACCATTTCTAGCCTT--TCAGCCTGT  
ATACCTCCGTCGTAAGCTTACCATATGAACGTT-TCTCAGTGAGCTAAAAGAT-TTCCTC  
GTAAATACGTCAGGTCAAGGTGCAGCCCACGAAATGGCAAGCAATGGGCTACAATTTCTA  
CCA---TAGAACATAACGAAAGACTACATGCAA-CTCAGTCATGAAGGCGGATTTAGCAG  
TAAAAGAAAGTAGAGAGTTCTTTTTAATTAGGCGCTGGGACGCGTACACACCGCCCGTC  
ACCCTCTTCAAACGCTTTA-TATATG-TTTATAACACT-TTTATGCATCACAGAAGAGGT  
AAGTCGTAACATGGTAAGTGACTGGAAAGTGCACCTTGGATTAA-CAAAATGTAGCTTAA  
CTAAA-GCATCTCGCTTACACCGAGAACATGTCCGTGAAACTCAGATCATTTTTGA--GCT  
GAAAACCTAGCTTAA--CTTATTCT-TATGAATATAC-CACCTTAA-CACTTA--CTAAA  
TAAAACATTTTGTAC-ATTAAGTAAAGGCGATTAAAAAATGTCTT-AAAGCTATAGAAAC  
TAGTACCGCAAGGGAAAAGTGAAATATTAATGAAAAA--CCTCAAGCACAAAAAAGTAGA  
GCTACAACCTCGTACCTTTTGCATCATGGTCTAACTAGTTCAACCAAGCAAAATGAATTT  
TAAGTTTGACTTCCCGAAACTAGGTGAGCTACTTAAAAACAGCCTTAC-GGGCCAACCCG  
TCTCTGTTGCAAAAGAGTGGAAGATTTT-TAAGTAGAGGTGACAGACCTATCGAACCTA  
GAGATAGCTGGTTATTCAGGAAAAGGATTTAAGTCTACCTTAAGTTTACT-GTACA-TA  
A-TAATACACAATT-AACTTTAAGAGCTATTCAAATAAGGTACAGCCTATT-GAAACAGG  
ATACAACCTCCATAA-----  
-----AAAAGCGTTAAAGCTTCATTG--TTTTTTATCAAAAAATACCACTA-AT  
TAACTGTAACCCTT-CACCT-GTACTGAATGATCTCATAGTTATATGAGAGCCTATATGT  
TAGAACTAGTAACAAGAAGA-AGCCCTTCTCCA-AAATGTAAGCATGAGCCAAAATGAAC  
TATTCACTGGCATTAAAGTTA-TAAACCTATTGTAGCAACTTA----ACAAGAAAAATC  
TAC-----AAATGCA-AACGTCAACCTTACACCAGCACATTTCTGGA

AAGATAAAAAGAATAGGAAGGAAGCTCGGCAAATAA-CTAACCCCGCCTGTTTTACCAAAAA  
CATCGCCTCCTGATCATCC---ATAGGAGGTCCAGCCTGCCAGTGACTAA--GTTAAAC  
GGCCGCGGTACCCTAACCGTGCAAAGGTAGCGCAATCACTTGTTCTTTAAATGAGGACTA  
GTATGAACGGCATCACGAGGGTTATGCTGTCTCCCTACTCTACTCAGTGAAACTGATCTC  
CCCGTGAAGAAGCGGGGATAAAAATATAAGACGAGAAGACCCCATGGAGCTTTAAACTCA  
GTGCCAACTGCCCTAAT--AATAACCTATTACCCTT-GCAG-CCATGGT-TACTAGTTTT  
CGGTTGGGGTGACCACGGAGTAAAATTTAACCTCCACGATGAAAGGAACTAATATCCTAA  
CCTATGAGCTACAGCTCTAAGTATCAAC-----AAATTGACTAA--TTGACCCAATT  
ACTT--GATCAACGAACCAAGTTACCCTGGGGATAACAGCGCAATCCATTTCAAGAGCTC  
ATATCGACAAATGGGTTTACG-ACC-TCGATGTTGGATCAGGGTATCCCAGTG-GCGCAG  
CCGCTA-CTAA-CGGTTC

>M. mukhlesuri MN534690, MN534482, MN534583

TTATTATCACCTCCCTCTCGACTTACACATGCAAGTTTCAGCACACCCGTGAGAACGCC  
TTCACCCTT-TTTAGGACAAGGAGCTGGTATCAGGCACAG---ACT-----TCTAGCCC  
ATGACACCTAGCTTTGCCACACCCTCAAGGGTCTTCAGCAGTGATTAACATTGTTTTATAA  
GCGCCAGCTTGAATCAGTCAGAGAACCA--AGAGCCGGCCAATACGGTGCCAGCCGCCGC  
GGCTACACCGCTAGGCTCAAGTTGATATT-ATTCGGCGTTAAGCGTGTTTAAAGTGCCCA  
ATATAGATTAGAATTAACCTTTAACCAAGCCGTGATACGCTTGTTTTCTAAGAAAACCATA  
ATCGAAAGTTATTCTAACCAACCCTTGAACCCACGACAGCTAGGGAACAACTGGGAT  
TAGGTACCCCACTATGCCTAGCCGTAAAACATTTACTTACACCC-TTAACCGCCCGGGAA  
TTACGAGCCCAAGCTTAAAACCCAAAGGACTTGACGGTGTCCCACCCACCTAGAGGAGCC  
TGTTCTATAA-TCGATTCCCCC-GATCTACCTCACCATTTCTAGCCTT--TCAGCCTGT  
ATACCTCCGTCGTAAGCTTACCATATGAACGTT-TCTCAGTGAGCTAAAAGAT-TTCCTC  
ATAAATACGTCAGGTCAAGGTGCAGCCACGAAATGGTAAGCAATGGGCTACAATTTCTA  
TCA---TAGAACATAACGAAAGACTACATGCAA-CTTAGTCATGAAGGCGGATTTAGCAG  
TAAAAGAAAATAGAGAGTTCTTTTTAATTAGGCGCTGGGACGCGTACACACCCGCCGTC  
ACCCTCTTCAAACGCTTTA-AATATG-TTTATAACACT-TTTATGCATCACAGAAGAGGT  
AAGTCGTAACATGGTAAGGTACTGGAAAGTGCACTTGGATTAA-CAAATGTAGCTTAA  
CTAAA-GCATCTCGCTTACACCGAGAACATGTCCGTGAAACTCAGATCATTTTTGA--GCT  
GAAAACCTAGCTTAC--TTTATTCT-TATGAATATAC-CACCTTAA-CACATA--CTAAA



TAAAACATTTTGTAC-ATTGAGTAAAGGCGATTAAAAAATGTCTA-AAAGCTATAGAAAC  
TAGTACCGCAAGGGAAAAGTCAAATATTAATGAAAA--CCTCAAGCACAAAAAAGTAGA  
GCTATAACCTCGTACCTTTTGCATCATGGTCTAACTAGTTCAACCAAGCAAATGAATTT  
TAAGTTTGACTTCCCGAAACTAGGTGAGCTACTTAAAAACAGCCTTAC-GGGCCAACCCG  
TCTCTGTTGCAAAAGAGTGGGAAGATTTTTTAAGTAGAGGTGACAGACCTACCGAACCTA  
GAGATAGCTGGTTATTCAGGAAAAGGATTTAAGTCCTACCTTAAGTTTACT-GTACA---  
-----  
-----AG  
CCATCTTTC-AAAAAGCGTTAAAGCTTCATTG--TTTTTATCAAAAA-TACCATTA-AT  
TAACTGTAACCCTT-CACCT-GTACTGAATGATCTCATAATTGTATGAGAGCCTATATGT  
TAGAACTAGTAACAAGAAGA-AGCCCTTCTCCA-AAATGTAAGCATAAGCCAAAATGAAC  
TATTCATTGGCATTAAAGTTA-TAAACCCATTGTAGCAACTTA----ACAAGAAAAACC  
TAC-----AAGTCA-AACGTCAACCTTACACCAGCACATTTCTGGA  
AAGATAAAAAGAATAGGAAGGAACTCGGCAAATAA-CTAACCCCGCCTGTTTACCAAAAA  
CATCGCCTCCTGATCACCC--ATAGGAGGTCCAGCCTGCCAGTACTAA--GTAAAC  
GGCCGCGGTACCCTAACCGTGCAAAGGTAGCGCAATCACTTGTTCTTTAAATGAGGACTA  
GTATGAACGGCATCACGAGGGTTATGCTGTCTCCCTACTCTACTCAGTGAAACTGATCTC  
CCCGTGAAGAAGCGGGATAAAAAATATAAGACGAGAAGACCCCATGGAGCTTTAAACTCA  
GTACCAACTGCCCAAT--AATAACCTATTATCCTT-GCAG-CCATGGT-TACTAGTTTT  
CGGTTGGGGTGACCACGGAGTAAAATTTAACCTCCACGATGAAAGGAACTAATATCCTAA  
CCTATGAGCTACAGCTCTAAGTATCAAC-----AAATTGACTAA--TTGACCCAATT  
ACTT--GATCAACGAACCAAGTTACCCTGGGGATAACAGCGCAATCCATTTCAAGAGCTC  
ATATCGACAAAATGGGTTTACG-ACC-TCGATGTTGGATCAGGGTATCCCAGTG-GCGCAG  
CCGCTA-CTAA-CGGTTC

>M. mukhlesuri MN534691, MN534483, MN534584

TTATTATCACCTCCCTCTCGACTTACACATGCAAGTTTCAGCACACCCGTGAGAACGCC  
TTCACCCTT-TTTAGGACAAGGAGCTGGTATCAGGCACAG---ACT-----TCTAGCCC  
ATGACACCTAGCTTTGCCACACCCTCAAGGGTCTTCAGCAGTGATTAACATTGTTTATAA  
GCGCCAGCTTGAATCAGTCAGAGAACCA--AGAGCCGGCCAATACGGTGCCAGCCGCCG  
GGCTACACCGCTAGGCTCAAGTTGATATT-ATTCGGCGTTAAGCGTGTTTAAAGTGCCCA

ATATAGATTAGAATTAACCTTTAACCAAGCCGTGATACGCTTGTTTCTAAGAAAACCATA  
ATCGAAAGTTATTCTAACCAAACCACTTGAACCCACGACAGCTAGGGAACAACTGGGAT  
TAGGTACCCCACTATGCCTAGCCGTAAAACATTTACTTACACCC-TTAACCGCCCGGAA  
TTACGAGCCCAAGCTTAAAACCAAAGGACTTGACGGTGTCCCACCCACCTAGAGGAGCC  
TGTTCTATAA-TCGATTCCCCC-GATCTACCTCACCATTTCTAGCCTT--TCAGCCTGT  
ATACCTCCGTCGTAAGCTTACCATATGAACGTT-TCTCAGTGAGCTAAAAGAT-TTCCTC  
ATAAATACGTCAGGTCAAGGTGCAGCCCACGAAATGGTAAGCAATGGGCTACAATTTCTA  
TCA---TAGAACATAACGAAAGACTACATGCAA-CTTAGTCATGAAGCGGATTTAGCAG  
TAAAAGAAAATAGAGAGTTCTTTTTAATTAGGCGCTGGGACGCGTACACACCGCCCGTC  
ACCCTCTTCAAACGCTTTA-AATATG-TTTATAACACT-TTTATGCATCACAGAAGAGGT  
AAGTCGTAACATGGTAAGTGTACTGGAAAGTGCACCTTGGATTAA-CAAATGTAGCTTAA  
CTAAA-GCATCTCGCTTACACCGAGAACATGTCCGTGAAACTCAGATCATTTTTGA--GCT  
GAAAACCTAGCTTAC--TTTATTCT-TATGAATATAC-CACCTTAA-CACATA--CTAAA  
TAAAACATTTTGTAC-ATTGAGTAAAGGCGATTAAAAAATGTCTA-AAAGCTATAGAAAC  
TAGTACCGCAAGGAAAAGTGAATATTAATGAAAAA--CCTCAAGCACAAAAAAGTAGA  
GCTATAACCTCGTACCTTTTGCATCATGGTCTAACTAGTTCAACCAAGCAAATGAATTT  
TAAGTTTGACTTCCCGAAACTAGGTGAGCTACTTAAAAACAGCCTTAC-GGGCCAACCCG  
TCTCTGTTGCAAAAGAGTGGGAAGATTTT-TAAGTAGAGGTGACAGACCTACCGAACCTA  
GAGATAGCTGGTTATTTCAGGAAAAGGATTTAAGTCTACCTTAAGTTTACT-GTACA-TT  
A-TAATACACAA-----  
-----AGCAG  
CCATCTTTC-AAAAAGCGTTAAAGCTTCATTG---TTTTTATCAAAAAATACCATTA-AT  
TAACTGTAACCCTT-CACCT-GTACTGAATGATCTCATAATTGTATGAGAACCCTATATGT  
TAGAACTAGTAACAAGAAGA-AGCCCTTCTCCA-AAATGTAAGCATAAGCCAAAATGAAC  
CATTCATTGGCATTAAAGTTA-TAAACCCATTGTAGCAACTTA----ACAAGAAAACC  
TAC-----AACTGCA-AACGTCAACCTTACACCAGCACATTTCTGGA  
AAGATAAAAAGAATAGGAAGGAACTCGGCAAATAA-CTAACCCCGCCTGTTTACCAAAAA  
CATCGCCTCCTGATCACCC---ATAGGAGGTCCAGCCTGCCAGTGACTAA--GTAAAC  
GGCCGCGGTACCCTAACCGTGCAAAGGTAGCGCAATCACTTGTTCTTTAAATGAGGACTA  
GTATGAACGGCATCACGAGGGTTATGCTGTCTCCCTACTCTACTCAGTGAAACTGATCTC

CCCGTGAAGAAGCGGGGATAAAAAATATAAGACGAGAAGACCCCATGGAGCTTTAAACTCA  
GTACCAACTGCCCAAT--ATAACCTATTATCCTT-GCAG-CCATGGT-TACTAGTTTT  
CGGTTGGGGTGACCACGGAGTAAAATTTAACCTCCACGATGAAAGGAACATAATATCCTAA  
CCTGTGAGCTACAGCTCTAAGTATCAAC-----AAATTGACTAA--TTGACCCAATT  
ACTT--GATCAACGAACCAAGTTACCCTGGGGATAACAGCGCAATCCATTTCAAGAGCTC  
ATATCGACAAATGGGTTTACG-ACC-TCGATGTTGGATCAGGGTATCCCAGTG-GCGCAG  
CCGCTA-CTAA-CGGTTC

>M. mukhlesuri MN534692, MN534484, MN534585

TTATTATCACCTCCCTCTCGACTTACACATGCAAGTTTCAGCACACCCGTGAGAACGCC  
TTCACCCTT-TTTAGGACAAGGAGCTGGTATCAGGCACAG---ACT-----TCTAGCCC  
ATGACACCTAGCTTTGCCACGCCCTCAAGGGTATTCAGCAGTGATTAACATTGTTTATGA  
GCGCCAGCTTGAATCAGTCAGAGAACCA--AGAGCCGGCCAATACGGTGCCAGCCGCCGC  
GGCTACACCGCTAGGCTCAAGTTGATATT-ATTCGGCGTTAAGCGTGTTTAAAGTGCC-  
AAACAGATTAGAGTTAACTTTAACCAAGCCGTGATACGCTTGTTTCTAAGAAAACCACA  
ATCGAAAGTTATTCTAACCAAAACCACTTGAACCCACGACAGCTAGGGAACAACTGGGAT  
TAGGTACCCCACTATGCCTAGCCGTAAAACATTTACTTACTC-TTAACCGCCCGGGAA  
TTACGAGCCCAAGCTTAAAACCAAAGGACTTGACGGTGTCCCACCCACCTAGAGGAGCC  
TGTTCTATAA-TCGATTCCCCC-GATCTACCTACCATTTCTAGCCTT--TCAGCCTGT  
ATACCTCCGTCGTAAGCTTACCATATGAACGTT-TCTCAGTGAGCTAAAAGAT-TTCTTG  
TAAAATACGTCAGGTCAAGGTGCAGCCCACGAAATGGTAAGCAATGGGCTACAATTTCTA  
CCA---TAGTACATAGCGAAAGACTACATCAAA-CTGAGTCATGAAGGCGGATTTAGCAG  
TAAAAGAAAAGTAGAGAGTTCTTTTTAATTAGGCGGTGGGACGCGTACACACCGCCCCTC  
ACCCTCTTCAACCGCTTTA-AATATG-TTTATAATACT-TTTATGCATCACAGAAGAGGT  
AAGTCGTAACATGGTAAGGTACTGGAAAGTGCAATTGGATTAA-CAAATGTAGCTTAA  
CTAAA-GCATCTCGCTTACACCGAGAACATGTCCGTGAAACTCAGATCATTTTGA--GCT  
GAAAACCTAGCTTAC--TTTATTCT-TATGAATATAC-CACCTTAA-CACACA--CTAAA  
TAACGCATTTTGTAC-ACTAAGTAAAGGCGATTTAAAAGATGTCTT-AAAGCTATAGAAAC  
TAGTACCGCAAGGGAAAAGTGAAATATTAGTGAAAA--CCTCAAGCACAAAAAAGTAGA  
GCTATAGCCTCGTACCTTTTGCATCATGGTCTAACTAGTTCAATCAAGCAAATGAATTT  
TAAGTTTGACTTCCCGAAACTAGGTGAGCTACTTAAAAACAGCCTTAC-GGGCCAACCCG

TCTCTGTTGCAAAAGAGTGGGAAGATTTT-TAAGTAGAGGTGACAGACCTACCGAACCTA  
GAGATAGCTGGTTATTCAGGAAAAGGATTTAAGTCCTACCTTAAGTTTACT-GTACA-TA  
A-TAATACATAATT-AACTTTAAGAGCTATTCAAATAAGGTACAGCCTATTTGAAACAGG  
ATACAACCTCC-----CAG  
CCACCTTAC-AAAAAGCGTTAAAGCTTCATTG--TTTATCAAAAA-TACCATAA-AT  
CAACTGTAACCCTT-CACCT-GTACTGAATGATCTCATAATTGTATGAGAGCCTATATGT  
TAGAACTAGTAACAAGAAGA-AGCCCTTCTCCA-AAATGTAAGCATGAGCCAAAATGAAC  
TATTCATTGGCATTAAAGTTA-TAAACCTATTGTAGCAACTTA----ACAAGAAAAATC  
TAC-----AACTGTA-TACGTCAACCTTACACCAGCACATCTCTGGA  
AAGATAAAAAGAATAGGAAGGAACTCGGCAAATAA-CTAACCCCGCCTGTTTACCAAAAA  
CATCGCCTCCTGATTACCC--ATAGGAGGTCCAGCCTGCCAGTACTAA--GTAAAC  
GGCCGCGGTACCCTAACCGTGCAAAGGTAGCGCAATCACTTGTTCTTTAAATGAGGACTA  
GTATGAACGGCATCACGAGGGTTATGCTGTCTCCCTACTCTACTCAGTGAAACTGATCTC  
CCCGTGAAGAAGCGGGGATAAAAATATAAGACGAGAAGACCCCATGGAGCTTTAAACTCA  
GTACCAACTGCCCTAGT--ATAACCTATTACCCTT-GCAG-TCATGGT-TACTAGTTTT  
CGGTTGGGGTGACCACGGAGTAAACTTAACTCCACGATGAAAGGAACTAATATCCTAA  
CCTATGAGCTACAGCTCTAAGTATCAAC-----AAATTGACTAA--CTGATCCAATT  
ACTT--GATCAACGAACCAAGTTACCCTGGGGATAACAGCGCAATCCATTTCAAGAGCTC  
ATATCGACAAAATGGGTTTACG-ACC-TCGATGTTGGATCAGGGTATCCCAGTG-GCGCAG  
CCGCTA-CTAA-TGGTTC

>M. mukhlesuri MN534693, MN534485, MN534586

TTATTATCACCTCCCTCTCGACTTACACATGCAAGTTTCAGCACACCCGTGAGAACGCC  
TTCACCCTT-TTTAGGACAAGGAGCTGGTATCAGGCACAG---ATT-----TCTAGCCC  
ATGACACCTAGCTTTGCCACGCCCTCAAGGGTCTTCAGCAGTGATTAACATTGTTTATAA  
GCGCCAGCTTGAATCAGTCAGAGAACCA--AGAGCCGGCCAATACGGTGCCAGCCGCCGC  
GGCTACACCGCTAGGCTCAAGTTGATATT-ATTCGGCGTTAAGCGTGTTTAAAGTGCCC-  
AAACAGATTAGAATTAACCTTTAACCAAGCCGTGATACGCTTGTTTCTAAGAAAACCACA  
ATCGAAAGTTATTCTAACCAACCCTTGAACCCACGACAGCTAGGGAACAACTGGGAT  
TAGGTACCCACTATGCCTAGCCGTAAAACATTTACTTACACCC-TTAACCGCCCGGGAA  
TTACGAGCCCAAGCTTAAAACCCAAAGGACTTGACGGTGTCCACCCACCTAGAGGAGCC

TGTTCTATAA-TCGATTCCCCC-GATCTACCTCACCATTTCTAGCCTT--TCAGCCTGT  
ATACCTCCGTCGTAAGCTTACCATATGAACGTT-TCTCAGTGAGCTTAAAGAT-TTCTTC  
GTAAATACGTCAGGTCAAGGTGCAGCCCACGAAATGGCAAGCAATGGGCTACAATTTCTA  
TCA---TAGAACATAACGAAAGACTACATGCAA-CTCAGTCATGAAGGCGGATTTAGCAG  
TAAAAAGAAAGTAGAGAGTTCTTTTTAATTAGGCGCTGGGACGCGTACACACCGCCCGTC  
ACCCTCTTCAAACGCTTTA-AATATG-TTTATAACACT-TTTATGCATCACAGAAGAGGT  
AAGTCGTAACATGGTAAGTGTACTGGAAAGTGCACCTTGGATTAA-CAAATGTAGCTTAA  
CTAAA-GCATCTCGCTTACACCGAGAACATGTCCGTGAAACTCAGATCATTTTGA--GCT  
GAAAACCTAGCTTAC--TTTATTCT-TATGAACATAC-TACCTTAT-TGTATA--CTAAA  
TAAAACATTTTGTAC-ATTAAGTAAAGGCGATTAAAAAATGTCTT-AAAGCTATAGAAAC  
CAGTACCGCAAGGGAAAAGTGAATATAAATGAAAA--CCTCAAGCACAAAAAAGTAGA  
GCTATAACCTCGTACCTTTTGCATCATGGTCTAACTAGTTCAACCAAGCAAATGAATTT  
TAAGTTTGACTTCTCGAAACTAGGTGAGCTACTTAAAAACAGCCTTAC-GGGCCAACCCG  
TCTCTGTTGCAAAAGAGTGGGAAGATTTTTTAAGTAGAGGTGACAGACCTACCGAACCTA  
GAGATAGCTGGTTATTTCAGGAAAAGGATTTAAGTCTACCTTAAGTTTACT-GTACA---  
-----  
-----  
-----C-AAAAGCGTTAAAGCTTCATTG---TTTTTATCAAAAA-TACCATTA-AT  
CTACTGTAACCCTT-CACCT-GTACTGAATGATCTCATAATTATATGAGAGCCTATATGT  
TAGAACTAGTAACAAGAAGA-AGCCCTTCTCCA-AAATGTAAGCATGAGCCAAAATGAAC  
TATTCATTGGCATTAAAGTTA-TAAACCCATTGTAGCAACTTA----ACAAGAAAAACC  
TAC-----AACTGCA-AACGTCAACCTTACACCAGCACATTTCTGGA  
AAGATAAAAAGAATAGGAAGGAACCTCGGCAAATAA-CTAACCCCGCCTGTTTACCAAAAA  
CATCGCCTCCTGACTACCC---ATAGGAGGTCCAGCCTGCCAGTGACTAA--GTTAAAC  
GGCCGCGGTACCCTAACCGTGCAAAGGTAGCGCAATCACTTGTTCTTTAAATGAGGACTA  
GTATGAACGGCATCACGAGGGTTATGCTGTCTCCCTACTCTATTTCAGTGAAACTGATCTC  
CCCGTGAAGAAGCGGGGATAAAGATATAAGACGAGAAGACCCCATGGAGCTTTAAACTCA  
GTACCAACTGCCCGCAT--AATAACCTATTACCCTT-GCAG-CCATGGT-TACTAGTTTT  
CGGTTGGGGTGACCACGGAGTAAAATTTAACCTCCACGATGAAAGGAAC TAATGTCCTAA  
CCTATGAGCTACAGCTCTAAGTATCAAC-----AAATTGACTAA--TTGACCCAATT

ACTT--GATCAACGAACCAAGTTACCCTGGGGATAACAGCGCAATCCATTTCAAGAGCTC  
ATATCGACAAATGGGTTTACG-ACC-TCGATGTTGGATCAGGGTATCCCAGTG-GCGCAG  
CCGCTA-CTAA-CGGTTC

>M. mukhlesuri MN534694, MN534486, MN534587

TTATTATCACCTCCCTCTCGACTTACACATGCAAGTTTCAGCACACCCGTGAGAACGCC  
TTCACCCTT-TTTAGGACAAGGAGCTGGTATCAGGCACAG---ACT-----TCTAGCCC  
ATGACACCTAGCTTTGCCACACCCTCAAGGGTCTTCAGCAGTGATTAACATTGTTTATAA  
GCGCCAGCTTGAATCAGTCAGAGAACCA--AGAGCCGGCCAATACGGTGCCAGCCGCCGC  
GGCTACACCGCTAGGCTCAAGTTGATATT-ATTCGGCGTTAAGCGTGTTTAAAGTGCCCA  
ATATAGATTAGAATTAACCTTTAACCAAGCCGTGATACGCTTGTTTCTAAGAAAACCATA  
ATCGAAAGTTATTCTAACCAAAACCACTTGAACCCACGACAGCTAGGGAACAACTGGGAT  
TAGGTACCCCACTATGCCTAGCCGTAAAACATTTACTTACACCC-TTAACCGCCCGGGAA  
TTACGAGCCCAAGCTTAAAACCCAAAGGACTTGACGGTGTCCCACCCACCTAGAGGAGCC  
TGTTCTATAA-TCGATTCCCCC-GATCTACCTCACCATTCTAGCCTT--TCAGCCTGT  
ATACCTCCGTCGTAAGCTTACCATATGAACGTT-TCTCAGTGAGCTAAAAGAT-----  
-----AAGCAATGGGCTACAATTTCTA  
CCA---TAGAACATAACGAAAGACTACATGCAA-CTTAGTCATGAAGGCGGATTTAGCAG  
TAAAAGAAAGTAGAGAGTTCTTTTTAATTAGGCGCTGGGACGCGTACACACCGCCCGTC  
ACCCTCTTCAAACGCTTTA-AATATG-TTTATAACACT-TTTATGCATCACAGAAGAGGT  
AAGTCGTAACATGGTAGGTGTACTGGAAAAGTGTACTTGGATTAA-CAAAATGTAGCTTAA  
CTAAA-GCATCTCGCTTACACCGAGAACATGTCTGTGAAACTCAGATCATTTAGA--GCT  
GAAAACCTAGCTTAC--TTTATTTT-TATGAATATAC-CACCATAA-CACATA--CTAAA  
TAAAACATTTTGTAC-ATTGAGTAAAGGCGATTAAAAAATGTCTA-AAAGCTATAGAAAC  
TAGTACCGCAAGGGAAAAGTGAAATATTAATGAAAA--CCTCAAGCACAAAAAAGTAGA  
GCTATAACCTCGTACCTTTTGCATCATGGTCTAACTAGTTCAACCAAGCAAAATGAATTT  
TAAGTTTGACTTCCCGAACTAGGTGAGCTACTTAAAAACAGCCTTAC-GGGCCAACCCG  
TCTCTGTTGCAAAAGATTTGGAAAATTTT-TAAGTAGAGGTGACAGACCTACCGAACCTA  
GAGATAGCTGGTTATTCAGGAAAAGGATTTATTTCTACATTAAGTTTACT-GTACA-TT  
A-TAATACACAACCT-AACTTTAAGAGCTATTCAAATAAGGTACAGCCTATTTGAAGCAGG  
ATACAACCTCCACA-----

-----  
-----TATGAGAGCCTATATGT  
AAGAAGTAGTAACAAGAAGA-AGCCCTAATCCA-AAATGTAAGCATAAGCCAAAATGAAC  
TATTCATTGGCATTTTAAAGTTA-TAAACCCATTGTAGCAACTTA----ACAAGAAAAACC  
TAC-----AACTGCA-AACGTCAACCTTACACCAGCACATTTCTGGA  
AAGATAAAAAGAATAGGAAGGAAGCTCGGCAAATAA-CTAACCCCGCCTGTTTACCAAAAA  
CATCGCCTCCTGATCACCC---ATAGGAGGTCCAGCCTGCCAGTGACTAA--GTAAAC  
GGCCGCGGTACCCTAACCGTGCAAAGGTAGCGCAATCACTTGTTCTTTAAATGAGGACTA  
GTATGAACGGCATCACGAGGGTTATGCTGTCTCCCTACTCTACTCAGTGAAACTGATCTC  
CCCGTGAAGAAGCGGGGATAAAAATATAAGACGAGAAGACCCCATGGAGCTTTAAACTCA  
GTACCAACTGCCCAAT--ATAACCTATTATCCTT-GCAG-CCATGGT-TACTAGTTTT  
CGGTTGGGGTGACCACGGAGTAAAATTTAACCTCCACGATGAAAGGAACATAATATCCTAA  
CCTGTGAGCTACAGCTCTAAGTATCAAC-----AAATTGACTAA--TTGACCCAATT  
ACTT--GATCAACGAACCAAGTTACCCTGGGGATAACAGCGCAATCCATTTCAAGAGCTC  
ATATCGACAAATGGGTTTACG-ACC-TCGATGTTGGATCAGGGTATCCCAGTG-GCGCAG  
CCGCTA-CTAA-TGGTTC

>M. fissipes MN534695, MN534487, MN534588

TTATTATCACCTCATTCTCGACTTACACATGCAAGTTTCAGCACACCCGTGAGAACGCC  
TTCACCCTT-TTTAGGACAAGGAGCTGGTATCAGGCACAG---AAC-----TCTAGCCC  
ATGACACCTAGTTTTGCCACACCCTCAAGGGTCTTCAGCAGTGATTAACATTGTTTATAA  
GCGCCAGCTTGAACCAGTTAGAGAACCC--AGAGCCGGCCAATACGGTGCCAGCCGCCGC  
GGCTACACCGCTAGGCTCAAGTTGATATTATTTTCGGCGTTAAGCGTGTTTAAAGTGCCCG  
TAACAGATTAGAATTAACCTTTAACCAAGCCGTGATACGTTGTTTCTAAGAAAACCACA  
ATCGAAAGTTATTCTAACCAAACCACTTGAACCCACGACAGCTAGGGAACAACTGGGAT  
TAGATACCCCACTATGCCTAGCCGTAAACATTTACTTACACCC-CTTACCGCCCGGGAA  
TTACGAGCCCAAGCTTAAACCCAAAGGACTTGACGGTGTCCACCCACCTAGAGGAGCC  
TGTTCTATAA-TCGATTCCCCC-GATCTACCTCACCCTTCTAGCTTT-TTCAGCCTGT  
ATACCTCCGTGTAAGCTTACCATATGAACGTT-TCTCAGTGAGCTAAAAGAT-TTCTTC  
ATAAATACGTCAGGTCAAGGTGCAGCCCACGAAGTGGCAAGCAATGGGCTACAATTTCTA  
TAA--TAGAACATAACGAAAGACTACATGCAA-CTCAGTCATGAAGGCGGATTTAGCAG

TAAAAAGAAAAGTAGAGAGTTCTTTTTTAATTAGGCGCTGGGACGCGTACACACCGCCCGTC  
ACCCTCTTCAAACGCTTTA-AATATG-TTTATAACACT-TTTATGCACCCCAGAAGAGGT  
AAGTCGTAACATGGTAAGTGTACTGGAAAGTGCACCTTGGATAAA-CAAAATGTAGCTTAA  
CTAAA-GCATCTCGCTTACACCGAGAACATGTCCGTGAAACTCAGATCATTTTTGA--GCT  
GAAAACCTAGCTTAC--CCAATTCC-TATGAATATAC-CACCTTAA-CATAAA--CTAAA  
TAAAACATTTTTGTAC-ATTTAGTAAAGGCGATTAAAAAATGTCTC-AAAGCTATAGAAAC  
TAGTACCGCAAGGGAAAAGTGAATATTAGTGAAAAA--CCTCAAGCACAAAAAAGTAGA  
GCTATAACCTCGTACCTTTTGCATCATGGTCTAACTAGTTCAACCAAGCAAAATGAATTT  
TAAGTTTGACTTCCCGAAACTAAGTGAGCTACTTAAAAACAGCCCTCC-GGGCCAACCCG  
TCTCTGTTGCAAAAGAGTGGGAAGATTTT-TAAGTAGAGGTGATAGACCTACCGAACCTA  
GAGATAGCTGGTTATTTCAGGAAAAGGATTTAAGTCCTACCTTAAGTTTACA-GTATA---  
-----  
-----GCAG  
CCATCTTAC-AAAAAGCGTTAAAGCTTCATTG--TTTTTTATCAAAAAATACCATTA-AT  
TAACTGTAACCCTT-CACCT-GTACTGAATGATCTCATAGTTATATGAGAGCCTATATGT  
TAGAACTAGTAACAAGAAGA-AGCCCTTCTCCA-AAATGTAAGCGTAAGCCAAAATGAAC  
TATTCATTGGCATTAAAGTTA-TAAACCCATTGTAGCAACTTA----ACAAGAAAAACC  
TAC-----AACTGAT-AACGTCAACCTTACACAAGCACATTTCTGGA  
AAGATAAAAAGAATAGGAAGGAAGTCTGGCAAACAA-CTAACCCCGCCTGTTTACCAAAAA  
CATCGCCTCCTGATCACCC---ATAGGAGGTCCAGCCTGCCAGTGACTAA--GTTAAAC  
GGCCGCGGTACCCTAACCGTGCAAAGGTAGCGCAATCACTTGTTCTTTAAATGAGGACTA  
GTATGAACGGCATCACGAGGGTTATGCTGTCTCCCTACTCTACTCAGTGAAACTGATCTC  
CCCGTGAAGAAGCGGGGATAAAAAATATAAGACGAGAAGACCCCATGGAGCTTTAAACTCA  
GTACCAACTGCCCAAAT--AAGAACCTATTATACTT-GCAG-CTATGGT-TACTAGTTTT  
CGGTTGGGGTGACCACGGAGTAAAATTAAACCTCCACGATGAAAGGAACCTAATAACCTAA  
CCTATGAGCTACAGCTCTAAGTATCAAC-----AAATTGACTAA--TTGACCCAATT  
ACTT--GATCAACGAACCAAGTTACCCTGGGGATAACAGCGCAATCCATTTCAAGAGCTC  
ATATCGACAAATGGGTTTACG-ACC-TCGATGTTGGATCAGGGTATCCCAGTG-GCGCAG  
CCGCTA-CTAA-CGGTTC

>M. fissipes MN534696, MN534488, MN534589



TTATTATCACCTCATTCTCGACTTACACATGCAAGTTTCAGCACACCCGTGAGAACGCC  
TTCACCCTT-TTTAGGACAAGGAGCTGGTATCAGGCACAG---AAC-----TCTAGCCC  
ATGACACCTAGTTTTGCCACACCCTCAAGGGTCTTCAGCAGTGATTAACATTGTTTTATAA  
GCGCCAGCTTGAACCAGTTAGAGAACCC--AGAGCCGGCCAATACGGTGCCAGCCGCCGC  
GGCTACACCGCTAGGCTCAAGTTGATATTATTTTCGGCGTTAAGCGTGTTTAAAGTGCCCG  
TAACAGATTAGAATTAACCTTTAACCAAGCCGTGATACGCTTGTTTCTAAGAAAACCACA  
ATCGAAAGTTATTTCTAACCAAACCACTTGAACCCACGACAGCTAGGGAACAACTGGGAT  
TAGGTACCCCACTATGCCTAGCCGTAAAACATTTACTTACACCC-CTTACCGCCCGGAA  
TTACGAGCCCAAGCTTAAAACCAAAGGACTTGACGGTGTCCACCCACCTAGAGGAGCC  
TGTTCTATAA-TCGATTCCCCC-GATCTACCTCACCCTTCTAGCTTT-TTCAGCCTGT  
ATACCTCAGTCGTAAGCTTACCATATGAACGTT-TCTCAGTGAGATAAAAGAT-TTCTTC  
ATAAATACGTCAGGTCAAGGTGCAGCCACGAAGTGGCAAGCAATGGGCTACAATTTCTA  
TAA---TAGAACATAACGAAAGACTACATGCAA-CTCAGTCATGAAGGCGGATTTAGCAG  
TAAAAGAAAGTAGAGAGTTCTTTTTAATTAGGCGCTGGGACGCGTACACACCGCCCGTC  
ACCCTCTTCAAACGCTTTA-AATATG-TTTATAAACT-TTTATGCACCCAGAAAGAGGT  
AAGTCGTAACATGGTAAGTGACTGGAAAGTGCACCTTGGATAAA-CAAAATGTAGCTTAA  
CTAAA-GCATCTCGCTTACACCGAGAACATGTCCGTGAAACTCAGATCATTTTGA--GCT  
GAAAACCTAGCTTAC--CCAATTCC-TATGAATACAC-CACCTTAA-CATAAA--CTAAA  
TAAAACATTTTGTAC-ATTTAGTAAAGGCGATTAAAAAATGTCTC-AAAGCTATAGAAAC  
TAGTACCGCAAGGGAAAAGTGAAATATTAGTGAAAAA--CCTCAAGCACAAAAAGTAGA  
GCTATAACCTCGTACCTTTTGCATCATGGTCTAACTAGTTCAACCAAGCAAAATGAATTT  
TAAGTTTGACTTCCCGAAACTAAGTGAGCTACTTAAAAACAGCCCTCC-GGGCCAACCCG  
TCTCTGTTGCAAAAGAGTGGGAAGATTTT-TAAGTAGAGGTGATAGACCTACCGAACCTA  
GAGATAGCTGGTTATTCAGGAAAAGGATTTAAGTCTACCTTAAGTTTACA-GTATA---  
-----  
-----GCAG  
CCATCTTAC-AAAAAGCGTTAAAGCTTCATCG---TTTTTATCAAAAAATACCATTA-AT  
TAACTGTAACCCTT-CACCT-GTACTGAATGATCTCATAGTTATATGAGAGCCTATATGT  
TAGAACTAGTAACAAGAAGA-AGCCCTCTCCA-AAATGTAAGCGTAAGCCAAAATGAAC  
TATTCATTGGCATTAAAGTTA-TAAACCTATTGTAGCAACTTA----ACAAGAAAAACC

TAC-----AACTGATAAACGTCAACCTTACACAAGCACATTTCTGGA  
AAGATAAAAAGAATAGGAAGGAACCTCGGCAAACAA-CTAACCCCGCCTGTTTACCAAAAA  
CATCGCCTCCTGATCACCC---ATAGGAGGTCCAGCCTGCCAGTGACTAA--GTTAAAC  
GGCCGCGGTACCCTAACCGTGCAAAGGTAGCGCAATCACTTGTTCTTTAAATGAGGACTA  
GTATGAACGGCATCACGAGGGTTATGCTGTCTCCCTACTCTACTCAGTGAAACTGATCTC  
CCCGTGAAGAAGCGGGGATAAAAATATAAGACGAGAAGACCCCATGGAGCTTTAAACTCA  
GTACCAACTGCCCAAAT--AGAACCTATTATACTT-GCAG-CTATGGT-TACTAGTTTT  
CGGTTGGGGTGACCACGGAGTAAATTAACCTCCACGATGAAAGGAACTAATAACCTAA  
CCTATGAGCTACAGCTCTAAGTATCAAC-----AAATTGACTAA--TTGACCCAATT  
ACTT--GATCAACGAACCAAGTTACCCTGGGGATAACAGCGCAATCCATTTCAAGAGCTC  
ATATCGACAAATGGGTTTACG-ACC-TCGATGTTGGATCAGGGTATCCCAGTG-GCGCAG  
CCGCTA-CTAA-CGGTTC

>M. chakrapanii MN534697, MN534489, MN534590

TTACTATCACCCCTTCTCGACTTACACATGCAAGTATCAGCACACCCGTGAGAACGCC  
TTCACCCTT-CTTAGGACAAGGAGCCGGTATCAGGCACAG---AAC-----CCTAGCCC  
ATGACACCTAGCTTTGCCACACCCTCAAGGGTCTTCAGCAGTGATTAACATTGTTTATAA  
GCGCCAGCTTGAATCAGTTAGAGAACCA--AGAGCCGGCCAATACGGTGCCAGCCGCCGC  
GGCTACACCCGCTAGGCTCAAGTTGATAGT-ATTCGGCGTTAAGCGTGTTTAAAGTGCTT-  
AAACAGATTAGAATCAAACCTTTAACCAAGCCGTGATACGCTTGTTTTTAAGAAAACCACA  
ATCGAAAGTTATTCTAACCAAAACCACTTGAACCCACGACAGCTAGGAAACAACTGGGAT  
TAGGTACCCCACTATGCCTAGCCGTAAAATATTTATTCACACCT-TTAACCGCCTGGGAA  
TTACGAGCCCAAGCTTAAAACCCAAAGGACTTGACGGTGTCCCACCCACCTAGAGGAGCC  
TGTTCTATAA-TCGATTCCCCC-GATCAACCTCACCATTTCTAGCCTC--TCAGCCTGT  
ATACCTCCGTCGTAAGCTTACCATATGAACGTT-TCTCAGTGAGCTAAAAGAT-TTCTTC  
ATAAATACGTCAGGTCAAGGTGCAGCCACGAAATGGCAAGCAATGGGCTACAATTTCTA  
AAA--TAGAACATAACGAAAGACTACATGCAA-CTCAGTAATGAAGCGGATTTAGCAG  
TAAAAGAAAATAGAGAGTTCTTTTTAATTAGGCGCTGGGACGCGTACACACCCGCCGTC  
ACCCTCTTCAAACGCTTTA-AACATG-TTTATAACACT-TTTATGCACCACAGAAGAGGT  
AAGTCGTAACATGGTAAGCGTACTGGAAAGTGCGCTTGGATAAA-CAAATGTAGCTTAA  
CTAAA-GCATCTCGCTTACACCGAGAACATGTCCGTTAAACTCAGATCATTTTGA--GCT

AAAAACCTAGCTTAC-CTTTATTCT-TATGAATACAC-CACCTTAA-CAAAA---CTAAA  
TAAAACATTTTGTAC-ATTAAGTAAAGGCGATTAAAAAATGTCTC-AAAGCTATAGAAAC  
TAGTACCGCAAGGGAAAAATGAAATATTAATGAAAA--CCTCAAGCACAAAAAAGTAGA  
GCTATAACCTCGTACCTTTTGCATCATGGTCTAACTAGTTCAACCAAGCAAATGAATTT  
TAAGTCTGACTTCCCGAACTAGGTGAGCTACTTAAAAACAGCCTTCC-GGGCCAACCCG  
TCTCTGTTGCAAAAGAGTGGGAAGATTTT-TAAGTAGAGGTGACAGACCTACCGAACCTA  
GAGATAGCTGGTTATTCAGGAAAAGGATCTAAGTCTTACCTTAAGTTTATT-GTACA-AG  
ACAATACACTATT-AAC-----  
-----  
-----CGTTAAAGCTTCATTG---TTTTTATCAAAAA-TACCATCA-AT  
TATCTGTAACCCTT-CATCT-GTACTGAATGATTTTATAATTATATGAAAGCCTATATGT  
TAGAACTAGTAACAAGAAGA-AGCCCTTCTCCA-AAATGTAAGCATAAGCCAAAATGAAC  
TATTCATTGGCATTAAAGTTA-TAAACCTATTGTAGCAACTCA---ACAAGAAAAACC  
TAC-----AACTGCA-AACGTCAACCTTACACCAGCACATTTCTGGA  
AAGATAAAAAGAATAGGAAGGAACTCGGCAAATAA-CTAACCCCGCCTGTTTACCAAAAA  
CATCGCCTCCTGATCACCC---ATAGGAGGTCCAGCCTGCCAGTACTAA--GTAAAC  
GGCCGCGGTACCCTAACCGTGCAAAGGTAGCACAATCACTTGTTCTTTAAATGAGGACTA  
GTATGAATGGCATCACGAGGGTTATGCTGTCTCCCTATTCCTACTCAGTGAACTGATCTC  
CCCGTGAAGAAGCGGGATAAAAAATATAAGACGAGAAGACCCCATGGAGCTTTAACTCA  
GTACCAACTGCCTAATT--AAGAACCTTTCATCCCT-GCAG-CCATGGT-TACTAGTTTT  
CGGTTGGGGTGACCACGGAGTAAAATTA AACCTCCATGATGAAAGGAACTAACAACCTAA  
CCTATGAGCTACAGCTCTAAGCATCAAT-----AAATTGACTAA--TTGATCCAATC  
AGTT--GATCAACGAACCTAGTTACCCTGGGGATAACAGCGCAATCCATTTCAAGAGCTC  
ATATCGACAAATGGGTTTACG-ACC-TCGATGTTGGATCAGGGTATCCAGTG-GCGCAG  
CCGCTA-CTAA-CGGTTC

>M. chakrapanii MN534698, MN534490, MN534591

TTACTATCACCCCTTCTCAACTTACACATGCAAGTATCAGCACACCCGTGAGAACGCC  
TTCACCCTT-TTTAGGACAAGGAGCCGGTATCAGGCACAG---AAC-----CCTAGCCC  
ATGACACCTAGCTTTGCCACACCCTCAAGGGTCTTCAGCAGTGATTAACATTGTTTATAA  
GCGCCAGCTTGAACCAGTTAGAGAACCA--AGAGCCGGCCAATACGGTGCCAGCCGCCG

GGCTACACCGCTAGGCTCAAGTTGATAGT-ACTCGGCGTTAAGCGTGTTTAAAGTGCTT-  
AAACAGATTTAAATTAACCTTTAACCAAGCCGTGATACGCTTGTTCCCTAAGAAAACCGCA  
ATCGAAAGTTATTCTAACCAAACCACTTGAACCCACGACAGCTAGGAAACAACTGAGAT  
TAGGTACCTCACTATGCCTAGCCGTAAAATATTTACTCACACCT-TTAACCGCCCGGAA  
TTACGAGCCCAAGCTTAAACCCAAAGGACTTGACGGTGTCCACCCACCTAGAGGAGCC  
TGTTCTATAA-TCGATTCCCCC-GATCTACCTCACCATTTCTAGCCTC--TCAGCCTGT  
ATACCTCCGTCGTAAGCTTACCATATGAACGTT-TCTCAGTGAGCTAAAAGAT-TTCTTC  
ATAAATACGTCAGGTCAAGGTGCAGCCCACGAAATGGCAAGCAATGGGCTACAATTTCTA  
CAA--TAGAACATAACGAAAGACTACATGCAA-CTCAGTCATGAAGGCGGATTTAGCAG  
TAAAAAGAAAATAGAGAGTTCTTTTTAATTAGGCGCTGGGACGCGTACACACCGCCCGTC  
ACCCTCTTCAAACGCTTTA-AACATG-TTTATAACACT-TTTATGCACCACAGAAGAGGT  
AAGTCGTAACATGGTAAGTGTACTGGAAAGTGCACCTTGGATAAA-CAAATGTAGCTTAA  
CTAAA-GCATCTCGCTTACACCGAGAACATGTCCGTAAACTCAGATCATTTTTGA--GCT  
AAAAACCTAGCTTAC-CTTTATTCT-TATGAATACAC-CACCTTAA-CAAAA--CTAAA  
TAAACATTTTGTAC-ATTAAGTAAAGGCGATTAATAATGAAAAA--AAAGCTATAGAAAC  
TAGTACCGCAAGGAAAAATGAAATATTAATGAAAAA--CCTCAAGCACAAAAAGTAGA  
GCTATAACCTCGTACCTTTTGCATCATGGTCTAACTAGTTCAACCAAGCAAATGAATTT  
TAAGTCTGACTTCCCGAAACTAGGTGAGCTACTTAAAAACAGCCTTCC-GGGCCAACCCG  
TCTCTGTTGCAAAAGAGTGGGAAGATTTT-TAAGTAGAGGTGACAGACCTACCGAACCTA  
GAGATAGCTGGTTATTCAGGAAAAGGATCTAAGTCTACCTTAAGTTTATT-GTACA-AG  
AACCAATACACTATT-AAC-----  
-----  
-----CGTTAAAGCTTCATTG---TTTTTATCAAAAA-TACCATCA-AT  
TAACTGTAACCCTT-CATCT-GTACTGAATGATTTTATAATTATATGAAAGCCTATATGT  
TAGAACTAGTAACAAGAAGA-AGCCCTTCTCCA-AAATGTAAGCATAAGCCAAAATGAAC  
TACTCATTGGCATTAAAGTTA-TAAACCTATTGTAGCAACTTA----ACAAGAAAAACC  
TAC-----AACTGCA-AACGTCAACCTTACACCAGCACATTTCTGGA  
AAGATAAAAAGAATAGGAAGGAACCTCGGCAAATAA-CTAACCCCGCCTGTTTACCAAAAA  
CATCGCCTCCTGATCACCC---ATAGGAGGTCCAGCCTGCCAGTACTAA--ATTAAAC  
GGCCGCGGTACACTAACCGTGCAAAGGTAGCGCAATCACTTGTTCTTTAAATGAGGACTA

GTATGAATGGCATCACGAGGGTTATGCTGTCTCCCTATTCCACTCAGTGAAACTGATCTC  
CCCGTGAAGAAGCGGGGATAAAAAATATAAGACGAGAAGACCCCATGGAGCTTTAAACTCA  
GTACCAACTGCCTAATT--AAGAACCTTTCATCCCT-GCAG-CCATGGT-TACTAGTTTT  
CGGTTGGGGTGACCACGGAGTAAAATTAACCTCCATGATGAAAGGAACTAACCAACCTAA  
CCTATGAGCTACAGCTCTAAGCATCAAT-----AAATTGACTAA--TTGATCCAATC  
AGTT--GATCAACGAACCTAGTTACCCTGGGGATAACAGCGCAATCCATTTCAAGAGCTC  
ATATCGACAAATGGGTTTACG-ACC-TCGATGTTGGATCAGGGTATCCCAGTG-GCGCAG  
CCGCTA-CTAA-----

>*M. mymensinghensis* MN534699, MN534491, MN534592

TTACTATCACCCCTTCTCAACTTACACATGCAAGTATCAGCATAACCGTGAGAACGCC  
TTCATCCTT-TTTAGGACAAGGAGCCGGTATCAGGCACAG---AAT-----TCTAGCCC  
ATGACACCTAGCTTTGCCACACCCTCAAGGGTCTTCAGCAGTGATTAACATTGTTTCATAA  
GCGCCAGCTTGAATCAGTTAGAGAGCCA--AGAGCCGGCCAATACGGTGCCAGCCGCCGC  
GGCTACACCGCTAGGCTCAAGTTGATAGT-ATTCGGCGTTAAGCGTGTTTAAAGTG-CCG  
-AACAGATTAGAATTAAACTTTAACCAAGCCGTGATACGCTTGTTTCTAAGAAAACCACA  
ATCGAAAGTTATTCTAACCAAAACCACTTGAACCCACGACAGCTAGAAAACAACTGGGAT  
TAGGTACCCCACTATGCCTAGCCGTAAAATATTTACTTACACCT-TTAACCGCCTGGGAA  
TTACGAGCCCAAGCTTAAAACCAAGGACTTGACGGTGTCCCACCCACCTAGAGGAGCC  
TGTTCTATAA-TCGATTCCCCC-GATATACCTCACCAAAAATAAAACT-TTCAGCCTGT  
ATACCTCCGTCGTAAGCTTACCATATGAACGTT-TCTCAGTGAGCTAAAAGAT-TTCTTC  
ATAAATACGTCAGGTCAAGGTGCAGCCCACGAAATGGCAAGCAATGGGCTACAATTTCTA  
CAA---TAGAACATAACGAAAGACTACATGCAA-CTCAGTCATGAAGGCGGATTTAGCAG  
TAAAAGAAAAATAGAGAGTTCTTTTTAATTAGGCGCTGGGACGCGTACACACCGCCCGTC  
ACCCTCTTCAAACGCTTAT-AATATG-TCTGTAACACT-TTTATGCACCACAGAAGAGGT  
AAGTCGTAACATGGTAAGTGTACTGGAAAGTGCACTTGGATAAA-CAAATGTAGCTTAA  
CTAAA-GCATCTCGCTTACACCGAGAACATGTCCGTGAAACTCAGATCATTTTTGA--GCT  
AAAAACCTAGCTTAA--CCCATTTCT-TATGAATACAC-CTCCTAA--CAAAA--CTGAA  
TAAAACATTTTGTAT-ATTAAGTAAAGGCGATTAATAAATATTTT- AAAGCTATAGAAAC  
CAGTACCGCAAGGGAAAAGTGAAATATTAGTGAAAAA--TCTTAAGCACAAAAAAGTAGA  
GTTATAGCCTCGTACCTTTTGCATCATGGTCTAACTAGTTCAACCAAGCAAAATGAATTT

TAAGTCTGACTTCCCGAAATTAGGTGAGCTACTTAAAGACAGCCTTCC-GGGCCAACCCG  
TCTCTGTTGCAAAAGAGTGGGAAGATCTT-TAAGTAGAGGTGACAGACCTACCGAACCTA  
AAGATAGCTGGTTATTCAGGAAAAGGATCTAAGTCCTACCTTAAGTTTATT-GTACA-AG  
AATAATACACTACT-AACTTTAAGAGCTATTCAAATAAGGTACAGCCTATTTGAACCAGG  
ATACAACCTCCACAATCGGGTAACATCTTTTTTTTA-TCAACTAAGTGGGCCTAAAAGCAG  
CCACCTTAC-AAAAAGCGTTAAAGCTTCATTG---TCCCTATTAAAAA-TACCATTA-AC  
TAACTGTAACCCTT-CATTT-GTACTGAATGATCCCATAATTATATGAGAGCCTATATGT  
TAGAACTAGTAACAAGAAGA-AGTTCTTCTCCA-AAATGTAAGCATAAGCCAAAATGAAC  
TATTCACTGGCATTAAAGTTA-TAAACCCATTGTAGCAACTTA----ACAAGAAAAACC  
TAC-----AACTGCA-AACGTTAACCTTACACCAGCGCATTTCTGGA  
AAGATAAAAAGAATAGGAAGGAACTCGGCAAATAA-CTAACCCCGCCTGTTTACCAAAAA  
CATCGCCTCCTGATCACCC---ATAGGAGGTCCAGCCTGCCAGTACTAA--GTAAAC  
GGCCGCGGTACCCTAACCGTGCAAAGGTAGCGCAATCACTTGTTCTTTAAATGAGGACTA  
GTATGAACGGCATCACGAGGGTTATGCTGTCTCCCTATTCTATTTCAGTGAAACTGATCTC  
CCCGTGAAGAAGCGGGATAAAAATATAAGACGAGAAGACCCCATGGAGCTTTAAACTCA  
GTACCAACTGCCAATT--AAAAACCTTTTACCCCT-GCAG-CTATGGT-TACTAGTTTT  
CGGTTGGGGTGACCACGGAGTAAAAATCAACCTCCACGATGAAAGGAACTAACAACCTAA  
CCTATGAGCTACAGCTCTAAGTATCAAT-----AAATTGACTAA--TTGATCCAATT  
ACTT--GATCAACGAACCTAGTTACCCTGGGGATAACAGCGCAATCCATTTCAAGAGCTC  
ATATCGACAAAATGGGTTTACGTACC-TCGATGTTGGATCAGGGTATCCCAGTG-GCGCAG  
CCGCTA-CTAA-CGGTTC

>Microhyla sp. 3 MN534700, MN534492, MN534593

TTATTATCATCTTTCCCTCGACTTACACATGCAAGTATCAGCATAACCCGTGAGAACGCC  
TTTACCCTT-CTTAGGATAAGGAGCTGGTATCAGGCACAG---AAT-----TCTAGCCC  
ATGACACCTAGCTTTGCCACACCCTCAAGGCCTTCAGCAGTGATTAACATTGTTTCATAA  
GCGCCAGCTTGAATCAGTCAGAGAACTT--AGAGCCGGCCAATACGGTGCCAGCCGCCGC  
GGCTATACCGCTAGGCTCAAGTTGATATT-ATTCGGCGTTAAGCGTGTTTAAAGTGACC-  
AAAA-GAATAAAATTAATTTAAACCAAGCCGTGACACGCTTGTTCCTAAGAAAAACAGA  
AACGAAAGTTATTTAAACCAACCCACTTGAACCCACGACAGCTAGAAAACAACTGGGAT  
TAGGTACCCCACTATGCCTAGCCGTAAAATATTTATTTACACCC-CTAACCGCCCGGAA

TTACGAGCCCAAGCTTAAAACCCAAAGGACTTGACGGTGTCCCACCCACCTAGAGGAGCC  
TGTTCTATAA-TCGATTCCCCC-GATCTACCTCACCCTTCTAGCCTC--TCAGCCTGT  
ATACCTCCGTCGTAAGCTTACCATATGAACGAT-TTTCAGTGAGCTAAAAGAT--TTTAC  
ATAAATACGTCAGGTCAAGGTGCAGCCCACGATGTGGAAAGAAATGGGCTACAATTTCTA  
TAA---TAGAACATAACGAAAGACTACATGCAA-CTCAGTCATGAAGGCGGATTTAGTAG  
TAAAAGAAAGTAGAGAGTTCTTTTTTAACCAGGCGCTGGGACGCGTACACACCGCCCGTC  
ACCCTCTTCAAACGCTTTA-ACTATG-TTTATAACACT-TTTATGCACTACAGAAGAGGT  
AAGTCGTAACACGGTAAGTGTACTGGAAAGTGCACCTTGGATAAA-CAAATGTAGCTTAA  
CTAAA-GCATCTCGCTTACACCGAGAACATGTCTGTGAAACCCAGATCATTTTTGA--GCT  
AAAACTTAGCTTAT--CTAATTCT-TATGTACTCCC-CTCCCCA-CAAATAAACTCAA  
TAAAACATTTTTTAC-ATTAAGTAAAGGCGATTAATAAATGTCTA-AAAGCTATAGAAAC  
TAGTACCGCAAGGAAAAGTGAATAAATAAATGAAAA--CCTCAAGCACAAAAAGCAGA  
GTTACAATCTCGTACCTTTTGCATCATGGTCTAACTAGTCTAACCAAGCAAATGAATTT  
TAAGTTTGACCCCCGAACTAGATGAGCTACTTAAAAACAGCCTTT-AGGGCCAACCCG  
TCCATGTTGCAAAATGGTGGGAAGATTTT-TAAGTAGAAGTGATAGACCTACCGAATCTA  
GAGATAGCTGGTTATTCAGGAAAAGGATTTTAGTCCTACCTTAGGTTTACT-ATATAGTT  
TACAATACTACCAC-AACCTTAAGAGCTATTCAAATAAGGTACAGCCTATTTGAAACAGG  
ATACAACCTCTACT-----AAGTGGGCCTAAAAGCAG  
CCACCTTAC-AAAAGCGTTAAAGCTTCATTGG---TTAAATTAATAA-TTCCATTA-AT  
TTTTTACAACCCTT-AATCT-GTACTGAATGATCTCATAATATTATGAGAGCCTATATGT  
TAGAACTAGTAACAAGAAGA-AGTCCTTCTCCA-AAATGTAAGCATGAGCCAAAATGAAC  
AATTCATTGGCAATTAAGTTA-AATATTTATTGTAGTAACCCA----ACAAGAAAAACC  
TAC-----TAATTATT-AGCGTCAACCTTACACTAGTACATTTCTGGA  
AAGATTAAGAAGTGGGAAGGAACCTCGGCAAATAA-TTAACCCCGCCTGTTTACCAAAAA  
CATCGCCTCCTGATATTTT---ATAGGAGGTCCAGCCTGCCAGTGACAAA--GTTAAAC  
GGCCGCGGTACCCTAACCGTGCAAAGGTAGCGCAATCACTTGTTCTTTAAATGAGGACTA  
GTATGAACGGCATCACGAGGGTTATGCTGTCTCCCACTCTATTTCAGTGAAACTGATTTT  
CCCGTGAAGAAGCGGGAATAAATAAAGACGAGAAGACCCCATGGAGCTTTAAGCTCA  
GTATCAACTGCCTAACT-AAAAACCTTATATTTT--GCAG-CCATGCT-TACTAGATTT  
CGGTTGGGGTGACCACGGAGTAAAACCTTAAACCTTCATGATGAAAGGAACCTAATAACCTAA

CCTATGAGCTACAGCTCTAAGTATCAAC-----AAATTGACTAAA-TTGACCCAATT  
ACTT--GATCAACAAACCAAGTTACCCCTGGGGATAACAGCGCAATCCATTCCAAGAGCTC  
ATATCGACAAATGGGTTTACG-ACC-TCGATGTTGGATCAGGGTATCCCAGTG-GCGCAG  
CTGCTA-CTAA-CGGTTC

>Microhyla sp. 3 MN534701, MN534493, MN534594

TTATTATCATCTTTCCCTCGACTTACACATGCAAGTATCAGCATAACCCGTGAGAACGCC  
TTTACCCTT-CTTAGGATAAGGAGCTGGTATCAGGCACAG---AAT-----TCTAGCCC  
ATGACACCTAGCTTTGCCACACCCTCAAGGGCCTTCAGCAGTGATTAACATTGTTTCATAA  
GCGCCAGCTTGAATCAGTCAGAGAACTT--AGAGCCGGCCAATACGGTGCCAGCCGCCGC  
GGCTATACCGCTAGGCTCAAGTTGATATT-ATTCGGCGTTAAGCGTGTTTAAAGTGACC-  
AAAA-GATTAATAATTAAATTTAAACCAAGCCGTGACACGCTTGTTCCTAAGAAAAACAAA  
AACGAAAGTTATTTTAAACCAACCACTTGAACCCACGACAGCTAGGAAACAACTGGGAT  
TAGGTACCCCACTATGCCTAGCCGTAAAATATTTATTTACACCC-CTAACCGCCCGGGAA  
TTACGAGCCCAAGCTTAAACCCAAAGGACTTGACGGTGTCCCACCCACCTAGAGGAGCC  
TGTTCTATAA-TCGATTCCCCC-GATCTACCTCACCCTTCTAGCCTC--TCAGCCTGT  
ATACCTCCGTCGTAAGCTTACCATATGAACGAT-TTTCAGTGAGCTAAAAGAT--TTTAC  
ATAAATACGTCAGGTCAAGGTGCAGCCACGATGTGGAAAGAAATGGGCTACAATTTCTA  
TAA---TAGAACATAACGAAAGACTACATGCAA-CTCAGTCATGAAGGCGGATTTAGTAG  
TAAAAGAAAGTAGAGAGTTCTTTTTTAACCAGGCGCTGGGACGCGTACACACCGCCCGTC  
ACCCTCTTCAAACGCTTTA-ACTATG-TTTATAACACT-TTTATGCACTACAGAAGAGGT  
AAGTCGTAACACGGTAAGTGTACTGGAAAGTGCACTTGGATAAA-CAAATGTAGCTTAA  
CTAAA-GCATCTCGCTTACACCGAGAACATGTCTGTGAAACCCAGATCATTTTCGA--GCT  
AAAAACTTAGCTTAT--CTAATTCT-TATGTACTCCC-CTCCCCA-CAAATAAACTCAA  
TAAAACATTTTTTAC-ATTAAGTAAAGGCGATTAATAAATGTCTA-AAAGCTATAGAAAC  
TAGTACCGCAAGGGAAAAGTGAATAAAAAATGAAAA--CTTCAAGCACAAAAAAGCAGA  
GTTACATTCTGGTACCTTTTGCATCATGGTCTAACTTGTCTAACCAAGCAAATGAATTT  
TAAGTTTGGCCCCCGAACTAGATGAGCTACTTAAAAACAGCCTTT-AGGGCCAACCCG  
TCCATGTTGCAAAATGGTGGGAAGATTTT-TAAGTAGAGGTGATAGACCTACCGAATCTA  
GAGATAGCTGGTTATTCAGGAAAAGGATTTTAGTCCTACCTTAGGTTTACT-ATATAGTT  
TACAATACTACCAC-AACCTTAAGAGCTATTCAAATAAGGTACAGCCTATTTGAAACAGG



ATACAACCTCTACT-----AAGTGGGCCTAAAAGCAG  
CCACCTTAC-AAAAAGCGTTAAAGCTTCATTGG--TTAAATTAAAAA-TTTCATTAAAT  
TAATTACAACCCT-AATCT-GTACTGAATGATCTCATAATATTATGAGAGCCTATATGT  
TAGAACTAGTAACAAGAAGA-AGTCCTTCTCCA-AAATGTAAGCATGAGCCAAAATGAAC  
AATTCATTGGCAATTAAGTTA-AATATTTATTGTAGTAACCCA----ACAAGAAAACC  
TAC-----TAATTATT-AGCGTCAACCTTACACTAGTACATTTCTGGA  
AAGATTAAGAATGGGAAGGAAGCTCGGCAAATAA-TTAACCCCGCCTGTTTACCAAAAA  
CATCGCCTCCTGATATTTT---ATAGGAGGTCCAGCCTGCCAGTGACAAA--GTAAAC  
GGCCGCGGTACCCTAACCGTGCAAAGGTAGCGCAATCACTTGTTCTTTAAATGAGGACTA  
GTATGAACGGCATCACGAGGGTTATGCTGTCTCCCCACTCTATTCAGTGAAACTGATTTT  
CCCGTGAAGAAGCGGAATAAAAATATAAGACGAGAAGACCCCATGGAGCTTTAAACTCA  
GTATCAACTGCCTAACT-AAAAACCTTATATTTT--GCAG-CCATGCT-TACTAGATTT  
CGGTTGGGGTGACCACGGAGTAAACTAAACCTCCATGATGAAAGGAACTAATAACCTAA  
CCTATGAGCTACAGCTCTAAGTATCAAC-----AAATTGACTAAA-TTGACCCAATT  
ACTT--GATCAACAAACCAAGTTACCCTGGGGATAACAGCGCAATCCATTTCAAGAGCTC  
ATATCGACAAATGGGTTTACG-ACC-TCGATGTTGGATCAGGGTATCCCAGTG-GCGCAG  
CTGCTA-CTAA-CGGTTC

>Microhyla sp. 3 MN534702, MN534494, MN534595

TTATTATCATCTTTCCCTCGACTTACACATGCAAGTATCAGCATAACCCGTGAGAACGCC  
TTTACCCTT-CTTAGGATAAGGAGCTGGTATCAGGCACAG---AAT-----TCTAGCCC  
ATGACACCTAGCTTTGCCACACCCTCAAGGGCCTTCAGCAGTGATTAACATTGTTTCATAA  
GCGCCAGCTTGAATCAGTCAGAGAACTT--AGAGCCGGCCAATACGGTGCCAGCCGCCGC  
GGCTATACCGCTAGGCTCAAGTTGATATT-ATTCGGCGTTAAGCGTGTTTAAAGTGACC-  
AAAA-GATTAATAAATAAAGTTAAACCAAGCCGTGACACGCTTGTTTCTAAGAAAAACAAA  
AACGAAAGTTATTTTAAACCAACCACTTGAACCCACGACAGCTAGGAAACAACTGGGAT  
TAGGTACCCCACTATGCCTAGCCGTAAAATATTTATTTACACCC-CTAACCGCCCGGAA  
TTACGAGCCCAAGCTTAAACCCAAAGGACTTGACGGTGTCCCACCCACCTAGAGGAGCC  
TGTTCTATAA-TCGATTCCCCC-GATCTACCTCACCCTTCTAGCCTC--TCAGCCTGT  
ATACCTCCGTCGTAAGCTTACCATATGAACGAT-TTTCAGTGAGCTAAAAGAT--TTTAC  
ATAAATACGTCAGGTCAAGGTGCAGCCACGATGTGGAAAGAAATGGGCTACAATTTCTA

TAA--TAGAACATAACGAAAGACTACATGCAA-CTCAGTCATGAAGGCGGATTTAGTAG  
TAAAAAGAAAAGTAGAGAGTTCTTTTTAACCAGGCGCTGGGACGCGTACACACCGCCCGTC  
ACCCTCTTCAAACGCTTTA-ACTATG-TTTATAACACT-TTTATGCACTACAGAAGAGGT  
AAGTCGTAACACGGTAAGTGTACTGGAAAGTGCACTTGGATAAA-CAAATGTAGCTTAA  
CTAAA-GCATCTCGCTTACACCGAGAACATGTCTGTGAAACCCAGATCATTTTTGA--GCT  
AAAACTTAGCTTAT--CTAATTCT-TATGTACTCCC-CCCCCCA-CAAATAAACTCAA  
TAAAACATTTTTTAC-ATTAAGTAAAGGCGATTAATAAATGTCTA-AAAGCTATAGAAAC  
TAGTACCGCAAGGAAAAGTGAATAAATAAATGAAAA--CCTCAAGCACAAAAAAGCAGA  
GTTACAATCTCGTACCTTTTGCATCATGGTCTAACTAGTCTAACCAAGCAAATGAATTT  
TAAGTTTGACCCCCGAACTAGATGAGCTACTTAAAAACAGCCTTT-AGGGCCAACCCG  
TCCATGTTGCAAATGGTGGGAAGATTTT-TAAGTAGAGGTGATAGACCTACCGAATCTA  
GAGATAGCTGGTTATTCAGGAAAAGGATTTTAGTCCTACCTTAGGTTTACT-ATATAGTT  
TACAATACTACCAC-AACCTTAAGAGCTATTCAAATAAGGTACAGCCTATTTGAAACAGG  
ATACAACCTCTACT-----AAGTGGGCCTAAAAGCAG  
CCACCTTAC-AAAAAGCGTTAAAGCTTCATGG--TTTAAATTAATAA-TTCCATTAAAT  
TTTTTACAACCCTT-AATCT-GTACTGAATGATCTCATAATATTATGAGAGCCTATATGT  
TAGAACTAGTAACAAGAAGA-AGTCCTTCTCCA-AAATGTAAGCATGAGCCAAAATGAAC  
AATTCATTGGCAATTAAGTTA-AATATTTATTGTAGTAACCCA----ACAAGAAAAACC  
TAC-----TAATTATT-AGCGTCAACCTTACACTAGTACATTTCTGGA  
AAGATTAAGAATGGGAAGGAACCTCGGCAAATAA-TTAACCCCGCCTGTTTACCAAAAA  
CATCGCCTCCTGATATTTT---ATAGGAGGTCCAGCCTGCCAGTGACAAA--GTTAAAC  
GGCCGCGGTACCCTAACCGTGCAAAGGTAGCGCAATCACTTGTCTTTAAATGAGGACTA  
GTATGAACGGCATCACGAGGGTTATGCTGTCTCCCACTCTATTTCAGTGAAACTGATTTT  
CCCGTGAAGAAGCGGGAATAAATAAATAAGACGAGAAGACCCCATGGAGCTTTAAACTCA  
GTATCAACTGCCTAACT-AAAAACCTTATATTTT--GCAG-CCATGCT-TACTAGATTT  
CGGTTGGGGTGACCACGGAGTAAACTAAACCTCCATGATGAAAGGAACATAAACCTAA  
CCTATGAGTTACAGCTCTAAGTATCAAC-----AAATTGACTAAA-TTGACCCAATT  
ACTT--GATCAACAAACCAAGTTACCCTGGGGATAACAGCGCAATCCATTTCAAGAGCTC  
ATATCGACAAATGGGTTTACG-ACC-TCGATGTTGGATCAGGGTATCCAGTG-GCGCAG  
CTGCTA-CTAA-CGGTTC

>Microhyla sp. 3 MN534703, MN534495, MN534596

TTATTATCATCTTTCCCTCGACTTACACATGCAAGTATCAGCATACCCGTGAGAACGCC  
TTTACCCTT-CTTAGGATAAGGAGCTGGTATCAGGCACAG---AAT-----TCTAGCCC  
ATGACACCTAGCTTTGCCACACCCTCAAGGGCCTTCAGCAGTGATTAACATTGTTTCATAA  
GCGCCAGCTTGAATCAGTCAGAGAACTT--AGAGCCGGCCAATACGGTGCCAGCCGCCGC  
GGCTATACCGCTAGGCTCAAGTTGATATT-ATTCGGCGTTAAGCGTGTTTAAAGTGACC-  
AAAA-GATTAATAAATTAACCTTAAACCAAGCCGTGACACGCTTGTTTTCTAAGAAAAACAAA  
AACGAAAGTTATTTTAACTAAACCACTTGAACCCACGACAGCTAGGAAACAACTGGGAT  
TAGGTACCCCACTATGCCTAGCCGTAAAATATTTATTTACACCC-CTAACCGCCCGGAA  
TTACGAGCCCAAGCTTAAAACCCAAAGGACTTGACGGTGTCCACCCACCTAGAGGAGCC  
TGTTCTATAA-TCGATTCCCCC-GATCTACCTCACCCTTCTAGCCTC--TCAGCCTGT  
ATACCTCCGTCGTAAGCTTACCATATGAACGAT-TTTCAGTGAGCTAAAAGAT--TTTAC  
ATAAATACGTCAGGTCAAGGTGCAGCCACGATGTGGAAAGAAATGGGCTACAATTTCTA  
TAA---TAGAACATAACGAAAGACTACATGCAA-CTCAGTCATGAAGGCGGATTTAGTAG  
TAAAAGAAAGTAGAGAGTTCTTTTTTAAACCAGGCGCTGGGACGCGTACACACCGCCCGTC  
ACCCTCTTCAAACGCTTTA-ACTATG-TTTATAACACT-TTTATGCACTACAGAAGAGGT  
AAGTCGTAACACGGTAAGTGTAAGTACTGGAAAGTGCACTTGGATAAA-CAAATGTAGCTTAA  
CTAAA-GCATCTCGCTTACACCGAGAACATGTCTGTGAAACCCAGATCATTTTCGA--GCT  
AAAACTTAGCTTAT--CTAATTCT-TATGTAAGTCCC-CTCCCCA-CAAATAAACTCAA  
TAAAACATTTTTCAC-ATTAAGTAAAGGCGATTAAAAAATGTCTA-AAAGCTATAGAAAC  
TAGTACCGCAAGGGAAAAGTGAATAAAAAATGAAAA--CCTCAAGCACAAAAAAGCAGA  
GTTACAATCTCGTACCTTTTGCATCATGGTCTAACTAGTCTAACCAAGCAAATGAATTT  
TAAGTTTGACCCCCGAAACTAGATGAGCTACTTAAAAACAGCCTTT-AGGGCCAACCCG  
TCCATGTTGCAAAATGGTGGGAAGATTTT-TAAGTAGAGGTGATAGACCTACCGAATCTA  
GAGATAGCTGGTTATTCAGGAAAAGGATTTTAGTCTACCTTAGGTTTACT-ATATAGTT  
TACAATACTACCAC-AACCTTAAGAGCTATTCAAATAAGGTACAGCCTATTTGAAACAGG  
ATACAACCTCTACT-----AAGTGGGCCTAAAAGCAG  
CCACCTTAC-AAAAGCGTTAAAGCTTCATTGG---TTAAATTAATAA-TTTCATTAAAT  
TAATTACAACCCCT-AATCT-GTACTGAATGATCTCATAATATTATGAGAGCCTATATGT  
TAGAACTAGTAACAAGAAGA-AGTCCTTCTCCA-AAATGTAAGCATGAGCCAAAATGAAC

AATTCATTGGCAATTAAGTTA-AATATTTATTGTAGTAACCCA----ACAAGAAAAACC  
TAC-----TAATTATT-AGCGTCAACCTTACACTAGTACATTTCTGGA  
AAGATTAAGAATGGGAAGGAAGCTCGGCAAATAA-TTAACCCCGCCTGTTTACCAAAAA  
CATCGCCTCCTGATATTTT---ATAGGAGGTCCAGCCTGCCAGTGACAAA--GTTAAAC  
GGCCGCGGTACCCTAACCGTGCAAAGGTAGCGCAATCACTTGTTCCTTTAAATGAGGACTA  
GTATGAACGGCATCACGAGGGTTATGCTGTCTCCCCACTCTATTCAGTGAAACTGATTTT  
CCCGTGAAGAAGCGGAATAAAAATATAAGACGAGAAGACCCCATGGAGCTTTAAACTCA  
GTATCAACTGCCTAACT-AAAAACCTTATATTTT--GCAG-CCATGCT-TACTAGATTT  
CGGTTGGGGTGACCACGGAGTAAACTAAACCTCCATGATGAAAGGAACATAAACCTAA  
CCTATGAGCTACAGCTCTAAGTATCAAC-----AAATTGACTAAA-TTGACCCAATT  
ACTT--GATCAACAAACCAAGTTACCCTGGGGATAACAGCGCAATCCATTTCAAGAGCTC  
ATATCGACAAATGGGTTTACG-ACC-TCGATGTTGGATCAGGGTATCCCAGTG-GCGCAG  
CTGCTA-CTAA-CGGTTC

>*M. okinavensis* MN534704, MN534496, MN534597

TTATTATCACCTCCCCCTCAACTTACACATGCAAGTATCAGCACACCCGTGAGAACGCC  
TTTACCCTT-CTTAGGATAAGGAGCTGGTATCAGGCACAG---AAT-----TCTAGCCC  
ACGACACCTAGCTTTGCCACACCCTCAAGGGTATTCAGCAGTGATTAACATTGTTTATAA  
GCGCCAGCTTGAATCAGTCAGAGGGCCC--AGAGCCGGCCAATACGGTGCCAGCCGCCGC  
GGCTACACCGCTAGGCTCAAGTTGATATT-ATTCGGCGTTAAGCGTGTTTAAAGTGCCC-  
AAAAAGATTAATAATTAACCTTAAACCAAGCCGTGACACGCTTGTTTCTAAGAAAAACAAA  
AACGAAAGTTATTTTAAACCAACCCACTTGAACCCACGACAGCTAGGAAACAACTGGGAT  
TAGGTACCCCACTATGCCTAGCCGTAAAAATTTACTCACATCC-TTAACCGCCTGGGAA  
TTACGAGCCCAAGCTTAAAACCCAAAGGACTTGACGGTGTCCCACCCACCTAGAGGAGCC  
TGTTCTATAA-TCGATTCCCCC-GATCTACCTCACCCTTCTAGCCTC--TCAGCCTGT  
ATACGTCCGTCGTAAGCTTACCATATGAACGAC--CCCAGTGAGCTAAACTAT--TATTC  
ATAAATACGTCAGGTCAAGGTGCAGCCCACGATGTGGGAAGAAATGGGCTACAATTTCTA  
CAT--TAGAACACAACGAAAGACTACATGCAA-CTCAGTCATGAAGCGGATTTAGTAG  
TAAAAAGAAAGTAGAGAGTTCTTTTTAATTAGGCGCTGGGACGCGTACACACCGCCCGTC  
ACCCTCTTCAAACGCTTTA-ATTACG-TTTATAAACT-TTTATGCACCACAGAAGAGGT  
AAGTCGTAACATGGTAAGTGTACTGGAAAGTGCACCTTGATAAA-CAAATGTAGCTTAA

CTAAA-GCATCTCGCTTACACCGAGAACATATCTGTGAGATCCGGATCATTTTGA--GCC  
AAAAACTTAGCTCAA--CTAATTCC-TATGTATTCCC-CACCCACG--TAATAAACCCAA  
TAAAACATTTTACAT-GTTTAGTAAAGGCGATTAAAAAATATCTA-AAAGCTATAGAAAC  
TAGTACCGCAAGGAAAAGTGAAATAAAAAATGAAAA--CTTCAAGCACAAAAAAGTAGA  
GCTATAATCTCGTACCTTTTGCATCATGGTCTAACTAGTCTACCCAAGCAAATGAATCT  
TAAGTTTGACCCCCGAACTAGATGAGCTACTTAAAAACAGCCTTT-AGGGCCAACCCG  
TCTCTGTTGCAAAGAGTGGAAGATTTT-TAAGTAGAGGTGATAAACCTACCGAACCTA  
GAGATAGCTGGTTATTTCAGGAAAAGGATTTAAGTCTTACCTTAGGTTTTTT-GTACA-TT  
TATAGTACACCCTC-AACCTTAAGAGCTATTCAAATAAGGTACAGCCTATTTGAAACAGG  
ATACAACCTCCACCAACGGGTAA-----AAGTGGGCCTAAAAGCAG  
CCACTTTAC-AAAAAGCGTTAAAGCTTAGTTG--TCCTAACTAAAA-TTCCTATA-AT  
TAATTATAACCCTT-AATCT-GTACTGAATAATCTCATAGTATTATGAGAGCCTGTATGT  
TAGAACTAGTAACAAGAAGA-AGCCCTTCTCCA-AAATGTAAGCATGAGCCAAAATGAAC  
CATTCATTGGTACTTAAAGTTA-TAAACCCACTGTAGTAACCCA---ACAAGAAAAATC  
TAC-----AAGTTATT-AACGTCAACCTAACACCAGTACATTTCTGGA  
AAGATTAAGAATGGGAAGGAACTCGGCAAATAA-TTAACCCCGCCTGTTTACCAAAAA  
CATCGCCTCCTGCCCTATT---ATAGGAGGTCCAGCCTGCCAGTGACAAA--GTTAAAC  
GGCCGCGGTACCCTAACCGTGCAAAGGTAGCGCAATCACTTGTTCTTTAAATGAGGACTA  
GTATGAACGGCATCACGAGGGTTATGCTGTCTCCCCACTCTATTCAGTGAAACTGATCTT  
CCCGTGAAGAAGCGGGAATAAAAAATATAAGACGAGAAGACCCCATGGAGCTTTAACTCA  
GTAGCAACTGCCTAAAT--AAAAACCTCACATTTCT--GCAG-CCGTGCT-TGCTAGTTTT  
CGGTTGGGGTGACCACGGAGTAAAACTAAACCTCCATGATGAAAGGAATTAATATCCTAA  
CCCACGAGCTACAGCTCTAAGTATTAAT-----AAATTAATAAAA-TTGACCCAATT  
ACTT--GATCAACGAACCAAGTTACCCTGGGGATAACAGCGCAATCCATTTCAAGAGCTC  
ATATCGACAAATGGGTTTACG-ACC-TCGATGTTGGATCAGGGTATCCCAGTG-GCGCAG  
CTGCTA-CTAA-TGGTT-

>M. okinavensis MN534705, MN534497, MN534598

TTATTATCACCTCCCCCTCAACTTACACATGCAAGTATCAGCACACCCGTGAGAACGCC  
TTTACCCTT-CTTAGGATAAGGAGCTGGTATCAGGCACAG---AAT-----TCTAGCCC  
ACGACACCTAGCTTTGCCACACCCTCAAGGGTATTACAGCAGTGATTAACATTGTTTATAA

GCGCCAGCTTGAATCAGTCAGAGGGCCC--AGAGCCGGCCAATACGGTGCCAGCCGCCGC  
GGCTACACCGCTAGGCTCAAGTTGATATT-ATTCGGCGTTAAGCGTGTTTAAAGTGCCC-  
AAAAAGATTAAAATTAACCTTAAACCAAGCCGTGACACGCTTGTTTCTAAGAAAAACAAA  
AACGAAAGTTATTTTAAACCAACCCACTTGAACCCACGACAGCTAGGAAACAACTGGGAT  
TAGGTACCCCACTATGCCTAGCCGTAAAATATTTACTCACATCC-TTAACCGCCTGGGAA  
TTACGAGCCCAAGCTTAAAACCCAAAGGACTTGACGGTGTCCCACCCACCTAGAGGAGCC  
TGTTCTATAA-TCGATTCCCCC-GATCTACCTCACCCTTCTAGCCTC--TCAGCCTGT  
ATACGTCCGTCGTAAGCTTACCATATGAACGAC--CCCAGTGAGCTAACTAT--TATTC  
ATAAATACGTCAGGTCAAGGTGCAGCCACGATGTGGGAAGAAATGGGCTACAATTTCTA  
CAT--TAGAACACAACGAAAGACTACATGCAA-CTCAGTCATGAAGCGGATTTAGTAG  
TAAAAGAAAGTAGAGAGTTCTTTTTAATTAGGCGCTGGGACGCGTACACACCGCCCGTC  
ACCCTCTTCAAACGCTTTA-ATTACG-TTTATAACACT-TTTATGCACCACAGAAGAGGT  
AAGTCGTAACATGGTAAGTGTACTGGAAAGTGCACCTTGGATAAA-CAAATGTAGCTTAA  
CTAAA-GCATCTCGCTTACACCGAGAACATATCTGTGAGATCCGGATCATTTTGA--GCC  
AAAACTTAGCTCAA--CTAACTCC-TATGTATTCCC-CACCCACG--TAATAAA-CCAA  
TAAAACATTTTACAT-GTTTAGTAAAGGCGATTAAAAAATATCTA-AAAGCTATAGAAAC  
TAGTACCGCAAGGGAAAAGTGAATAAAAAATGAAAA--CTTCAAGCACAAAAAGTAGA  
GCTATAATCTCGTACCTTTTGCATCATGGTCTAACTAGTCTACCCAAGCAAATGAATTT  
TAAGTTTGACCCCCGAAACTAGATGAGCTACTTAAAAACAGCCTTT-AGGGCCAACCCG  
TCTCTGTTGCAAAGAGTGGGAAGATTTT-TAAGTAGAGGTGATAAACCTACCGAACCTA  
GAGATAGCTGGTTATTCAGGAAAAGGATTTAAGTCTTACCTTAGGTTTTTT-GTACA-TT  
TATAGTACACCCTT-AACCTTAAGAGCTATTCAAATAAGGTACAGCCTATTTGAAACAGG  
ATACAACCTCCACCAACGGGTAA-----AAGTGGGCCTAAAAGCAG  
CCACATTAC-AAAAGCGTTAAAGCTTAGTTG---TCCTAACTAAAA-TTCCTATA-AT  
TAATTATAACCCTT-AATCT-GTACTGAATAATCTCATAGTATTATGAGAGCCTATATGT  
TAGAACTAGTAACAAGAAGA-AGCCCTTCTCCA-AAATGTAAGCATGAGCCAAAATGAAC  
CATTCATTGGTACTTAAAGTTA-TAAACCCACTGTAGTAACCCA---ACAAGAAAAATC  
TAC-----AAGTTATT-AACGTCAACCTAACACCAGTACATTTCTGGA  
AAGATTAAAAGAATGGGAAGGAACCTCGGCAAATAA-TTAACCCCGCCTGTTTACCAAAAA  
CATCGCCTCCTGCCCTATT---ATAGGAGGTCCAGCCTGCCAGTGACAAA--GTAAAC

GGCCGCGGTACCCTAACCGTGCAAAGGTAGCGCAATCACTTGTTCTTTAAATGAGGACTA  
GTATGAACGGCATCACGAGGGTTATGCTGTCTCCCCACTCTATTCAGTGAAACTGATCTT  
CCCGTGAAGAAGCGGGAATAAAAATATAAGACGAGAAGACCCCATGGAGCTTTAAACTCA  
GCAGCAACTGCCTAAAT--AAAAACCTCACATTCT--GCAG-CCGTGCT-TGCTAGTTTT  
CGGTTGGGGTGACCACGGAGTAAACTAAACCTCCATGATGAAAGGAATTAATATCCTAA  
CCCACGAGCTACAGCTCTAAGTATTAAC-----AAATTAACTAAA-TTGACCCAATT  
ACTT--GATCAACGAACCAAGTTACCCTGGGGATAACAGCGCAATCCATTTCAAGAGCTC  
ATATCGACAAATGGGTTTACG-ACC-TTGATGTTGGATCAGGGTATCCCAGTG-GCGCAG  
CCGCTA-ATAA-TGGTT-

>M. berdmorei MN534706, MN534498, MN534599

TTATCATCAGCTTACCCCTAACTTACACATGCAAGTATCAGCACGCCCGTGAGAACGCC  
TTAAACCTT-ATTAGGACAAGGAGCCGGTATCAGGCACAG---ACTA-----TCTAGCCC  
ATGACACCTAGCTTTGCCACTCCCTCAAGGGTATTCAGCAGTGATTAACATTGTTTATAA  
GCGCCAGCTTGAATCAGTTAAGGGGCAC--AGAGCCGGCCAATACGGTGCCAGCCGCCGC  
GGCTACACCGCTAGGCTCAAGTTGATATT-ATGCGGCGTTAAGCGTGTTTAAAGTGCTA-  
AAGA-GATTAATAATTAATAATAACTAAGCTGGTACCCGCTTGGTAATAAGAAAAACAAA  
TACCAAAGTTATTCCAACCCATCCCCTTGAACCCCGACAGCTAAAAAACCAACTGGGAT  
TAAGTACCCCACTATGCCTAACCGTAAAAATATTTATTTACACCT-TTAACCGCCCGGAA  
TTACGAGCCCAAGCTTAAAACCCAAAGGACTTGACGGTGTCCCACCCACCTAGAGGAGCC  
TGTTCTATAA-TCGATTCTCCCC-GATATACCTCACCGTTTCTAGCTTT--TCAGCCTGT  
ATACCTCCGTCGTAAGCTTACCCTATGAACGCT-TTTTAGTGAGCTAAAAGAT-CTTCAC  
ATAAATACGTCAGGTCAAGGTGCAGCCTACGAAACGGCAAGAAATGGGCTACAATTTCTA  
CAA---TAGAACACAACGAAAGACTACATGCAA-CTTAGTCATGAAGGCGGATTTAGTAG  
TAAAAGAAAAATAGAGAGTTCTTTTAAATTAGGCGCTGGGACGCGTACACACCCGCCGTC  
ACCCTCTTCAAACGCTTAC-AACCAG-TCTATAACAAA-TTTTTGCACTACAGAAGAGGT  
AAGTCGTAACATGGTAAGCGTACTGGAAAGTGCGCTTGAATAA-CAAATGTAGCTTAA  
CTAAA-GCATCTCGCTTACACCGAGGACATATCTGTGAAACTCTGATCGTTTTGA--GCT  
AAAAATCTAGCTCTT--CTCATTCT-TATGAATACTC-CACCTCTT-AACCAA---CTGA  
TAAATCATTTTCTAC-ATAAAGTAAAGGCGATAGAAAAATGTTTA-GAAGCTATAGAAAG  
TAGTACCGCAAGGGAAAAATGAAATAATAATGAAAA-TTTACAAGCACCAAAAAGCAGA

GCTGTAGCCTCGTACCTTTTGCATCATGGTCTAACTAGTCTAATCAAGCAAAGTGCATTT  
TTAGTTTGACCCCCGAAACTAGGTGAGCTACTTAAAAACAGCCGTT-AGGGCCAACCCG  
TCTCTGTTGCAAAAGAGTGGGAAGATTTT-TAAGTAGGGGTGACAGACCTATCGAACCTA  
GAGATAGCTGGTTATTTAGGAAAAGGATTTAAGTCTACCTTAAAATTTTT-----  
-----  
-----  
-----  
-----  
-----TGTACTAAATAATTTTATAACTATATAAAAAACGCATATGT  
TAGAACTAGTAACAAGAAGA-AGTACTTCTCCA-AAATGTAAGCTTAAGCCAAAATGAAC  
CCCTCACTGGCAATTAAAGTCAATAAACCCCTAGTAGTAACTCA----TCAAGAAAACCC  
TAC-----TACCACA-AACGTTAACCTTACACTAGCACATTACTGGA  
AAGAAATAAAGAGGGGGAAGGAACCTCGGCAAATAATTTAACCCCGCCTGTTTACCAAAAA  
CATCGCCTCTTGCTATCT----ATAAGAGGTCCAGCCTGCCAGTGACTAA--GTAAAC  
GGCCGCGGTACCCTAACCGTGCAAAGGTAGCGCAATCACTTGTTCTTTAAATGAGGACTA  
GTATGAACGGCATCACGAGGGTTATACTGTCTCCCCCTTTTTTTCAGTGAAACTGATCTT  
CCCGTGAAGAAGCGGGAATATTGTTATAAGACGAGAAGACCCCATGGAGCTTTAAACTCA  
GAATCAACTGCCACAAA--CTTAGCCTAAAAATAAC-GCAG-AAATGAC-TTCTAGTTTT  
CGGTTGGGGTGACCGCGGAGTAAAATAAACCTCCACGACGAAAGGAACCTAACCTCCTAA  
CCTAAGAGCTACAGCTCTAAGTATTAAA-----ACATTAACCTAA-TTGATCCAATT  
ACTT--GATCAACGAACCAAGTTACCCTGGGGATAACAGCGCAATCCATTTCAAGAGCTC  
ATATCGACAAAATGGGTTTACG-ACC-TCGATGTTGGATCAGGATATCCAAGTG-GCGCAG  
CCGCTA-CTAA-CGGTTC

>M. berdmorei MN534707, MN534499, MN534600

TTATCATCAGCTTACCCCTAACTTACACATGCAAGTATCAGCACACCCGTGAGAACGCC  
TTAAACCTT-ATTAGGACAAGGAGCCGGTATCAGGCACAG---ACTA-----TCTAGCCC  
ATGACACCTAGCTTTGCCACTCCCTCAAGGGTATTCAGCAGTGATTAACATTGTTTATAA  
GCGCCAGCTTGAATCAGTTAAGGGGCAC--AGAGCCGGCCAATACGGTGCCAGCCGCCG  
GGCTACACCGCTAGGCTCAAGTTGATATC-ATGCGGCGTTAAGCGTGTTTAAAGTGCTA-  
AAAA-GATTAGAATTTAAAATATAACTAAGCTGTGACACGCTTGTTAGTAAGAAAAGCAGA  
TACGAAAGTTATTCTAACCCACCCACTTGAACCCACGACAGCTAAGACACAAACTGGGAT



TAGGTACCCCCTATGCCTAGCCGTAAAAATATTTATTTACACCT-TTAACCGCCCGGAA  
TTACGAGCCCAAGCTTAAAACCCAAAGGACTTGACGGTGTCCCACCCACCTAGAGGAGCC  
TGTTCTATAA-TCGATTCTCCCC-GATATACCTCACCG-----  
-----  
-----  
-----  
-----AGGCGCTGGGACGCGTACACACCGCCCGTC  
ACCCTCTTCAAACGCTTAC-AACCAG-TTTATAACAAA--TTTTGCATTACAGAAGAGGT  
AAGTTGTAACATGGTAAGCGTACTGGAAAGTGCCTTGAATAA-CAAATGTAGTTTAA  
CTAAA-GCATCTCGCTTACACCGAGAATATGTTTGTGAGACCCTGATCGTTTTGA--GCT  
AAAAATCTAGCTTTT--CTCATTCC-TATGAATACCC-CACCTCCT-AACCAA---TTAA  
TAAATCATTTTTTAC-ATAAAGTAAAGGCGATAGAAAAATGCCTA-GAAGCTATAGAAAG  
TAGTACCGCAAGGAAAGATGAAATAATAATGAAAAA-TTTACAAGCACCAAAAAGCAGA  
GCTGTAACCTTGTACCTTTTGCATCATGGTCTAACTAGTCTAATCAAGCAAATGCATTT  
TTAGTTTGACCCCCGAAACTAGGTGAGCTACTTAAAAACAGCCGTT-AGGGCCAACCCG  
TTTTTGTTGCAAAGAGTGGGAAGATTTT-TAAGTAGGGGTGACAGACCTATCGAACCTA  
GAGATAGCTGGTTATTTCAGGAAAAGGATTTAAGTCCTACCTTAAAATTTTT-ATACC-CC  
CCCAAGTATTCTCAAATTTTAAGAGCTATTCAAATAAGGTACAGCCTATTTGAAACAGG  
ATACAACCTCCATCAA-----  
-----  
-----  
-----TAAGCCAGAAGGAAC  
CCTTCACTGGCAATTAAGTCAATAAACCCCTTAGTAGTAACCAA----TCAAGAAAACCC  
TAC-----TACTACA-AACGTTAACCTTACACCAGCACATTTCCGGA  
AAGAAATAAAGAGGAGGAAGGAACCTCGGCAAATAATCTAACCCCGCCTGTTTACCAAAAA  
CATCGCCTCTTGCCATCT---ATAAGAGGTCCAGCCTGCCAGTGACAAA--GTTAAAC  
GGCCGCGGTACCCTAACCGTGCAAAGGTAGCGCAATCACTTGTTCCTTTAAATGAGGACTA  
GTATGAACGGCATCACGAGGGTTATACTGTCTCCCCCTTTTTTTCAGTGAAACTGATCTT  
CCCGTGAAGAAGCGGGAATATTAATATAAGACGAGAAGACCCCATGGAGCTTTAAACTCA  
GAATCAACTGCCACAAA--ATTAACCTAATAATCAC-GCAG-AAGTGAC-TTCTAGTTTT

CGGTTGGGGTGACCGCGGAGTAAAATAAAACCTCCACGACGAAAGGAACTAACCTCCTAA  
CCTAAGAGCCACAGCTCTAAGTATTAAA-----ACATTAACCTAA-TTGATCCAATT  
ACTT--GATCAACGAACCAAGTTACCCTGGGGATAACAGCGCAATCCATTTCAAGAGCTC  
ATATCGACAAATGGGTTTACG-ACC-TCGATGTTGGATCAGGATATCCAAGTG-GCGCAG  
CCGCTA-CTAA-CGGTTC

>M. berdmorei MN534708, MN534500, MN534601

TTATCATCAGCTTACCCCTGACTTACACATGCAAGTATCAGCACACCCGTGAGAACGCC  
TTAAACCTT-ACTAGGACAAGGAGCCGGTATCAGGCACAG---ATTA-----TCTAGCCC  
ATGACACCTAGCTTTGCCACTCCCTCAAGGGTACTCAGCAGTGATTAACATTGTTTCATAA  
GCGCCAGCTTGACTCAGTCAAGGGGTTT--AGAGCCGGCCAATACGGTGCCAGCCGCCGC  
GGCTACACCGCTAGGCTCAAGTTGATTTTT-ATGCGGCGTTAAGCGTGTTTAAAGTGCCA-  
AAAA-GACTAGAATTTAAAATATAACTAAGCTGTGACACGCTTGTTAATAAGAAAAACAGA  
TACGAAAGTTATTCTAACCAACCCACTTGAACCCACGACAGCTAAGACACAACTGGGAT  
TAGGTACCCCACTATGCCTAGCCGTAAAATATTTATTTACACCT-TTAACCGCCCGGGAA  
TTACGAGCCCAAGCTTAAAACCCAAAGGACTTGACGGTGTCCCACCCACCTAGAGGAGCC  
TGTTCTATAA-TCGATTCTCCCC-GATATACCTCACCG-----  
-----  
-----  
-----AACGAAAGACTACATGCAA-CTTAGTCATGAAGGCGGATTTAGTAG  
TAAAAGAAAATAGAGAGTTCTTTTTAATTAGGCGCTGGGACGCGTACACACCCGCCCGTC  
ACCCTCATCAAACGCTTAC-AACCAG-TTTATAACAAA-TTTCTGCACCACAGAAGAGGT  
AAGTCGTAACATGGTAAGCGTACTGGAAAGTGCGCTTGGAAATAA-CAAATGTAGCTTAA  
CTAAA-GCATCTCGCTTACACCGAGAATATATCTGTGAAACTCTGATCGTTTTGAG-GCT  
AAAAATCTAGCTTTT--CTTATTTT-TATGAATACCC-CACCCCTT-AACCTA----AAT  
TAAATCATTTTTTAC-ATAAAGTAAAGGCGATAGAAAATGCCTA-GAAGCTATAGAAAG  
TAGT-CCGCAAGGGAAAGATGAAATAATAATGAAAA--CTGCAAGCACCAAAAAGCAGA  
GCTGCAACCTCGTACCTTTTGCATCATGGTCTAACTAGTCCAACCAAGCAAATGCATTT  
TTAGTTTGACCCCCGAACTAGGTGAGCTACTTAAAAACAGCCATT-AGGGCCAACCCG  
TCTCTGTTGCAAAAGAGTGGGAAGATTTTT-TAAGTAGGGGTGACAGACCTATCGAACCTA  
GAGATAGCTGGTTATTTAGGAAAAGGATCTAAGTCTACCTTAAAATTTT--GTACT-CC

ATCAAGTATTTCCG-AATTTTAAGAGCTATTCAAATAAGGTACAGCCTGTT-GAAATAGG  
ATACAACCTCCATCAA-----  
-----AAAAAAGCGTTAAAGCTTCATTG----TCTTATTAAAAAATTCCTACTA-AC  
TACATAAAACCCTTTAACCTGTACTAAATAATTTTATAACTCTATAAAAATCCATATGT  
TGGAAGTACTAGTAACAAGAAGA-AACTCTTCTCCA-AAATGTAAGCATAAGCCAGAATGAAC  
CCCTCACTGGCAATTAAGTCAATAAACCTCTAGTAGTAACCCA-----TCAAGAAAACCC  
TTC-----TATTATG-AACGTTAACCTTACACTAGCACATTTCTGGA  
AAGAAAGAAAGAGGGGGAAGGAAGTTCGGCAAATAATTTAACCCCGCCTGTTTACCAAAAA  
CATCGCCTCTTGCCAACT----ATAAGAGGTCCAGCCTGCCAGTGACAAA--GTTTAAAC  
GGCCGCGGTACCCTAACCGTGCAAAGGTAGCGCAATCACTTGTTCCTTTAAATGAGGACTA  
GTATGAACGGCATCACGAGGGTTATACTGTCTCCCCCTTTTTTTCAGTGAAACTGATCTT  
CCCGTGAAGAAGCGGGAATATAAATATAAGACGAGAAGACCCCATGGAGCTTTAAACTCA  
GAATCAACTGCTACAAA--CTTAGCCTAATAACTAC-GCAG-GAATGAC-TTCTAGTTTT  
AGGTTGGGGTGACCGCGGAGTAAAATAAAACCTCCACGACGAAAGGAACTAACCGCCTAA  
ACCAAGAGCCACAGCTCTAAGTATTAAA-----ACATTAACCCAA-TTGATCCAATT  
ACTT--GATCAACGAACCAAGTTACCCTGGGGATAACAGCGCAATCCATTTCAAGAGCTC  
ATATCGACAAAATGGGTTTACGTACC-TCGATGTTGGATCAGGATATCCAAGTG-GCGCAG  
CCGCTA-CTAA-CGGTTC

>M. berdmorei MN534709, MN534501, MN534602

TTATCATCAGCTTACCCCTGACTTACACATGCAAGTATCAGCACACCCGTGAGAACGCC  
TTAAACCTT-ACTAGGACAAGGAGCCGGTATCAGGCACAG---ATTA-----TCTAGCCC  
ATGACACCTAGCTTTGCCACTCCCTCAAGGGTACTCAGCAGTGATTAACATTTGTTTCATAA  
GCGCCAGCTTGACTCAGTCAAGGGGTTT--AGAGCCGGCCAATACGGTGCCAGCCGCCGC  
GGCTACACCGCTAGGCTCAAGTTGATTTT-ATGCGGCGTTAAGCGTGTTTAAAGTGCCA-  
AAAA-GACTAGAATTAATAATAACTAAGCTGTGACACGCTTGTTAATAAGAAAAACAGA  
TACGAAAGTTATTCTAACCAACCCACTTGAACCCACGACAGCTAAGACACAACTGGGAT  
TAGGTACCCCACTATGCCTAGCCGTAAAATATTTATTTACACCT-TTAACCGCCCGGGAA  
TTACGAGCCCAAGCTTAAAACCCAAAGGACTTGACGGTGTCCCACCCACCTAGAGGAGCC  
TGTTCTATAA-TCGATTCTCCCC-GATATACCTCACCG-----  
-----

-----  
-AA--TAGAACATAACGAAAGACTATATGCAA-CTTAGTCATGAAGGCGGATTTAGTAG  
TAAAAAGAAAATAGAGAGTTCTTTTTAATTAGGCGCTGGGACGCGTACACACCGCCCGTC  
ACCCTCTTCAAACGCTTAC-AACCAG-TGTATAACAAA-TTTCTGCACCACAGAAGAGGT  
AAGTCGTAACATGGTAAGCGTACTGGAAAGTGCCTTGAATAA-CAAATGTAGCTTAA  
CTAAA-GCATCTCGCTTACACCGAGAATATATCTGTGAAACTCTGATCGTTTTGA--GCT  
GAAAATCTAGCTCTT--CTTATTCT-TATGAATACCC-CACCCCTT-AACCTA---TAAA  
TAAATCATTTTTTAC-ATAAAGTAAAGGCGATAGAAAAATGCCTA-GAAGCTATAGAAAG  
TAGTACCGCAAGGGAAAGATGAAATAATAATGAAAA--CTGCAAGCACCAAAAAGCAGA  
GCTGCAACCTCGTACCTTTTGCATCATGGTCTAACTAGTCCAACCAAGCAAATGCATTT  
TTAGTTTTGACCCCCGAAACTAGGTGAGCTACTTAAAAACAGCCATT-AGGGCCAACCCG  
TCTCTGTTGCAAAGAGTGGAAGATTTT-TGAGTAGGGGTGACAGACCTATCGAACCTA  
GAGATAGCTGGTTATTTAGGAAAAGGATCTAAGTCCTACCTTAAAATTTTT-GTACT-CC  
ATCAAGTATTTCCG-AATTTAAGAGCTATTCAAATAAGGTACAGCCTGTTTGAAATAGG  
ATACAACCTCCATCAATGG-----CAG  
CCACCTTTT-AAAAGCGTTAAAGCTTCATTG---TCTTATTAAAAAATTCCTACTA-AC  
TACATAAAACCTT-AACCCTGTACTAAATAATTTTATAACTCTATAAAAATCCATATGT  
TGGAACTAGTAACAAGAAGA-AACCCTTCTCCA-AAATGTAAGCATAAGCCAGAATGAAC  
CCCTCACTGGCAATTAAAGTCAATAAACCTCTAGTAGTAACCCA----TCAAGAAAACCC  
TTC-----TATTATG-AACGTTAACCTTACACTAGCACATTTCTGGA  
AAGAAAGAAAGAGGGGGAAGGAACTCGGCAAATAATTTAACCCCGCTGTTTACCAAAA  
CATCGCCTCTTGCCAACT----ATAAGAGGTCCAGCCTGCCAGTGACAAA--GTTTAAAC  
GGCCGCGGTACCCTAACCGTGCAAAGGTAGCGCAATCACTTGTTCTTTAAATGAGGACTA  
GTATGAACGGCATCACGAGGGTTATACTGTCTCCCCCTTTTTTCAGTGAAACTGATCTT  
CCCGTGAAGAAGCGGGAATATAAATATAAGACGAGAAGACCCCATGGAGCTTTAAACTCA  
GAATCAACTGCTACAAA--CTTAGCCTAATAACTAC-GCAG-GAATGAC-TTCTAGTTTT  
AGGTTGGGGTGACCGCGGAGTAAATAAAACCTCCACGACGAAAGGAACCTAACCGCCTAA  
ACCAAGAGCCACAGCTCTAAGTATTAAA-----ACATTAACCTAA-TTGATCCAATT  
ACTT--GATCAACGAACCAAGTTACCCTGGGGATAACAGCGCAATCCATTTCAAGAGCTC  
ATATCGACAAATGGGTTTACG-ACC-TCGATGTTGGATCAGGATATCCAAGTG-GCGCAG

CCGCTA-CTAA-CGGTTC

>M. berdmorei MN534710, MN534502, MN534603

TTATCATCAGCTTACCCCTAACTTACACATGCAAGTATCAGCACACCCCGTGAGAACGCC  
TTAAACCTT-CTAGGACAAGGAGCCGGTATCAGGCACAG---ATTA-----TCTAGCCC  
ATGACACCTAGCTTTGCCACTCCCTCAAGGGTACTCAGCAGTGATTAACATTGTTTCATAA  
GCGCCAGCTTGACTCAGTTAAGGGGTAT--AGAGCCGGCCAATACGGTGCCAGCCGCCGC  
GGCTACACCGCTAGGCTCAAGTTGATTTT-ATGCGGCGTTAAGCGTGTTTAAAGTGCTA-  
AAAA-GATTAGAATTAATAATATAGCCAAGCTGTGACACGCTTGTTAGTAAGAAAAACAGA  
TACGAAAGTTATTTCTAACCAACCCACTTGAACCCACGACAGCTAAGACACAAACTGGGAT  
TAGGTACCCCACTATGCCTAGCCGTAAAATATTTATTTACACCT-TTAACCGCCCGGGAA  
TTACGAGCCCAAGCTTAAAACCCAAAGGACTTGACGGTGTCCCACCCACCTAGAGGAGCC  
TGTTCTATAA-TCGATTCTCCCC-GATATACCTCACCGCTTCTAGCTTT--TCAGCCTGT  
ATACCTCCGTCGTAAGCTTACCCTATGAACGCT-TTTTAGTGAGCTAAAAGAT-CTTTAC  
ATAAATACGTCAGGTCAAGGTGCAGCCTACGAAGCGGCAAGAAATGGGCTACAATTTCTA  
CAA---TAGAACACAACGAAAGACTACATGCAA-CTTAGTCATGAAGGCGGATTTAGTAG  
TAAAAGAAAATAGAGAGTTCTTTTTTAACCAGGCGCTGGGACGCGTACACACCGCCCGTC  
ACCCTCTTCAAACGCTTAA-AACCAG-TTTATAACAAA-TTTCTGCACCACAGAAGAGGT  
AAGTCGTAACATGGTAAGCGTACTGGAAAGTGCCTTGGGAATAA-CAAAATGTAGCTTAA  
CTAAA-GCATCTCGCTTACACCGAGAATATGTCTGTGAAACCCTGATCGTTTTTGA--GCT  
AAAAATCTAGCTCTT--CTTATTCT-TATGAATACCC-CACCTTTT-AACCAA---TAAA  
TAAATCATTTTTTAC-ATAAAGTAAAGGCGATAGAAAAATGCCTA-GAAGCTATAGAAAA  
CAGTACCGCAAGGGAAAGATGAAATATTAATGAAAAA--TTGCAAGCACCAAAAAGCAGA  
GCTGTAACCTCGTACCTTTTGCATCATGGTCTAACTAGTCTAACCAAGCAAAATGCATTT  
TTAGTTTGACCCCCGAAACTAGGTGAGCTACTTAAAAACAGCCATT-AGGGCCAACCCG  
TCTCTGTTGCAAAAGAGTGGAAGATTTTTTTAAGTAGGGGTGACAGACCTATCGAACCTA  
GAGATAGCTGGTTATTTAGGAAAAGGATTTAAGTCTTAAATTTT-ATACC-CC  
ATCAAGTATTTTCC-----  
-----  
-----TTCCATTA-AC  
TACATAAAACCCTT-AACTCTGTACTAAATAATTTTATAACTGTATAAAAGCCCGTATGT

TGGAAGTAGTAACAAGAAGA-AACCCTTCTCCA-AAATGTAAGCATAAGCCAGAATGAAC  
CCCTCACTGGCAATTAAGTCAATAAAAACCCTAGTAGTAAGTCA----TCAAGAAAACCC  
TTC-----TATTGTA-AACGTTAACCTTACACCAGCACATTTCTGGA  
AAGAAAAAAGAGGGGGAAGGAAGTTCGGCAAATA-TTTAACCCCGCCTGTTTACCAAAAA  
CATCGCCTCTTGCTAACT----ATAAGAGGTCCAGCCTGCCAGTGACAAA--GTAAAC  
GGCCGCGGTACCCTAACCGTGCAAAGGTAGCGCAATCACTTGTTCCTTTAAATGAGGACTA  
GTATGAACGGCATCACGAGGGTTATACTGTCTCCCCCTTTTTTTCAGTGAAACTGATCTT  
CCCGTGAAGAAGCGGGAATATTAATATAAGACGAGAAGACCCCATGGAGCTTTAAACTCA  
GAATCAACTGCCACAAA--CTTAACCTAATAACTAT-GCAG-GAGTGAC-TTCTAGTTTT  
CGGTTGGGGTGACCGCGGAGTAAAATAAAACCTCCACGACGAAAGGAATTAACCACCTAA  
ACCAAGAGCCACGGCTCTAAGTATTAAA-----ACATTAACCTAA-TTGATCCAATT  
ACTT--GATCAACGAACCAAGTTACCCTGGGGATAACAGCGCAATCCATTTCAAGAGCTC  
ATATCGACAAATGGGTTTACG-ACC-TCGATGTTGGATCAGGATATCCAAGTG-GCGCAG  
CCGCTA-CTAA-CGGTTC

>M. berdmorei MN534711, MN534503, MN534604

TTATCATCAGCTTACCCCTAACTTACACATGCAAGTATCAGCACACCCGTGAGAACGCC  
TTAAACCTT-ACTAGGACAAGGAGCCGGTATCAGGCACAG---ATTA-----TCTAGCCC  
ATGACACCTAGCTTTGCCACTCCCTCAAGGGTATTTCAGCAGTGATTAACATTGTTTCATAA  
GCGCCAGCTTGACTCAGTTAAGGAGTAT--AGAGCCGGCCAATACGGTGCCAGCCGCCGC  
GGCTACACCGCTAGGCTCAAGTTGATTTT-ATGCGGCGTTAAGCGTGTTTAAAGTGCTA-  
AAAA-GATTAGAATTAATAATATAGCCAAGCTGTGACACGCTTGTTAGTAAGAAAAACAGA  
TACGAAAGTTATTCTAACCAACCCACTTGAACCCACGACAGCTAAGACACAAACTGGGAT  
TAGGTACCCCACTATGCCTAGCCGTAAAAATATCTACTTACACCT-TTAACCGCCTGGGAA  
TTACGAGCCCAAGCTTAAAACCCAAAGGACTTGACGGTGTCCCACCCACCTAGAGGAGCC  
TGTTCTATAA-TCGATTCTCCCC-GATATACCTCACCGCTTCTAGCTTT-TTCAGCCTGT  
ATACCTCCGTGTAAGCTTACCCTATGAACGCT-TTTTAGTGAGCTAAAAGAT-CTTTAC  
ATAAATACGTCAGGTCAAGGTGCAGCCTACGAAGCGGCAAGAAATGGGCTACAATTTCTA  
CAA--TAGAACACAACGAAAGACTACATGCAA-CTTAGTCATGAAGGCGGATTTAGTAG  
TAAAAAGAAAATAGAGAGTTCTTTTTAATCAGGCGCTGGGACGCGTACACACCGCCCGTC  
ACCCTCTTCAAACGCTTAA-AACCAG-TTTATAACAAA-TTTCTGCACCACAGAAGAGGT

AAGTCGTAACATGGTAAGCGTACTGGAAAAGTGCCTTGGGAATAA-CAAAATGTAGCTTAA  
CTAAA-GCATCTCGCTTACACCGAGAACATGTCTGTGAAACCCTGATCGTTTTTGA--GCT  
AAAAATCTAGCTCTT--CTTATTCT-TATGAATACCC-CACCTTTT-AACCAA---TAAA  
TAAATCATTTTTTTAC-ATAAAGTAAAGGCGATAGAAAAATGCCTA-GAAGCTATAGAAAA  
CAGTACCGCAAGGGAAAGATGAAATATTAATGAAAA--TTGCAAGCACCAAAAAGCAGA  
GCTGTAACCTCGTACCTTTTGCATCATGGTCTAACTAGTCTAACCAAGCAAATGCATTT  
TTAGTTTGACCCCCGAAACTAGGTGAGCTACTTAAAAACAGCCATT-AGGGCCAACCCG  
TCTCTGTTGCAAAAGAGTGGGAAGATTTT-TAAGTAGGGGTGACAGACCTATCGAACCTA  
GAGATAGCTGGTTATTTAGGAAAAGGATTTAAGTCCTACCTTAAAATTTTT-----  
-----  
-----  
-----  
-----AAAAAAGCGTTAAAGCTTCATTG---TTTTATTAAAAAATTCATTA-AC  
TTCATAAAACCCTT-AACTCTGTACTAAATAATTTTATAACTGTATAAAAGCCCGTATGT  
TAGAACTAGTAACAAGAAGA-AACCCTTCTCCA-AAATGTAAGCATAAGCCAGAATGAAC  
CCCTCACTGGCAATTAAAGTCAATAAAACCCTAGCAGTAACTCA---TCAAGAAAACCC  
TTC-----TATTGTA-AACGTTAACCTTACACCAGTACATTTCTGGA  
AAGAAAGAAAGAGGGGGAAGGAACTCGGCAAATAATTTAACCCCGCTGTTTACCAAAAA  
CATCGCCTCTTGCTAACT---ATAAGAGGTCCAGCCTGCCAGTGACAAA--GTAAAC  
GGCCGCGGTACCCTAACCGTGCAAAGGTAGCGCAATCACTTGTTCTTTAAATGAGGACTA  
GTATGAACGGCATCACGAGGGTTATACTGTCTCCCCCTTTTTTTCAGTGAAACTGATCTT  
CCCGTGAAGAAGCGGGAATATTAATATAAGACGAGAAGACCCCATGGAGCTTTAAACTCA  
GAATCAACTGCCACAAA--CTTAACCTAATAACCAT-GCAG-AAATGAC-TTCTAGTTTT  
CGGTTGGGGTGACCGCGGAGTAAAATAAAACCTCCACGACGAAAGGAACTAACACCTAA  
ACCAAGAGCCACAGCTCTAAGTATTA---ACATTAACCTAA-TTGATCCAATT  
ACTT--GATCAACGAACCAAGTTACCCTGGGGATAACAGCGCAATCCATTTCAAGAGCTC  
ATATCGACAAATGGGTTTACG-ACC-TCGATGTTGGATCAGGATATCCAAGTG-GCGCAG  
CCGCTA-CTAA-CGGTTC

>M. berdmorei MN534712, MN534504, MN534605

TTATCATCAGCTTACCCCTAACTTACACATGCAAGTATCAGCACACCCGTGAGAACGCC  
TTAAACCTT-ACTAGGACAAGGAGCCGGTATCAGGCACAG---ATTA-----TCTAGCCC

ATGACACCTAGCTTTGCCACTCCCTCAAGGGTATTCAGCAGTGATTAACATTGTTTCATAA  
GCGCCAGCTTGACTCAGTTAAGGGGTAT--AGAGCCGGCCAATACGGTGCCAGCCGCCGC  
GGCTACACCGCTAGGCTCAAGTTGATTTT-ATGCGGCGTTAAGCGTGTTTAAAGTGCTA-  
AAAA-GATTAGAATTAATAATATAGCCAAGCTGTGACACGCTTGTTAGTAAGAAAAACAGA  
TACGAAAGTTATTCTAACCAACCCACTTGAACCCACGACAGCTAAGACACAACTGGGAT  
TAGGTACCCCACTATGCCTAGCCGTAAAATATTTATTTACACCT-TTAACCGCCCGGGAA  
TTACGAGCCCAAGCTTAAAACCCAAAGGACTTGACGGTGTCCACCCACCTAGAGGAGCC  
TGTTCTATAA-TCGATTCTCCCC-GATATACCTCACCGCTTCTAGCTTT-TTCAGCCTGT  
ATACCTCCGTCGTAAGCTTACCCTATGAACGCT-TTTTAGTGAGCTAAAAGAT-CTTTAC  
ATAAATACGTCAGGTCAAGGTGCAGCCTACGAAGCGCAAGAAATGGGCTACAATTTCTA  
CAA--TAGAACACAACGAAAGACTACATGCAA-CTTAGTCATGAAGGCGGATTTAGTAG  
TAAAAGAAAATAGAGAGTTCTTTTTAATCAGGCGCTGGGACGCGTACACACCGCCCGTC  
ACCCTCTTCAAACGCTTAA-ACCCAG-TTTATAACAAA-TTTCTGCACCACAGAAGAGGT  
AAGTCGTAACATGGTAAGCGTACTGGAAAGTGCGCTTGAATAA-CAAAATGTAGCTTAA  
CTAAA-GCATCTCGCTTACACCGAGAACATGTCTGTGAAACCCTGATCGTTTTGA--GCT  
AAAAATCTAGCTCTT--CTTATTCT-TATGAATACCCCCACCTTTT-AACCAA--TAAA  
TAAATCATTTTTTAC-ATAGAGTAAAGGCGATAGAAAAATGCCTA-GAAGCTATAGAAAA  
CAGTACCGCAAGGGAAAGATGAAATATTAATGAAAA--TTGCAAGCACCAAAAAGCAGA  
GCTGCAACCTCGTACCTTTTGCATCATGGTCTAACTAGTCTAACCAAGCAAATGCATTT  
TTAGTTTGACCCCCGAAACTAGGTGAGCTACTTAAAAACAGCCATT-AGGGCCAACCCG  
TCTCTGTTGCAAAAGAGTGGAAGATTTT-TAAGTAGGGGTGACAGACCTATCGAACCTA  
GAGATAGCTGGTTATTTAGGAAAAGGATTTAAGTCTACCTTAAAATTTTT-ATACC-CC  
ATC-----  
-----  
-----TT-AAAAAGCGTTAAAGCTTCATTG-----TTTATTAAAAATTCATTA-AC  
TACATAAAACCCTT-AACTCTGTACTAAATAATTTTATAACTATATAAAAGCCCGTATGT  
TGGAAGTAGTAACAAGAAGA-AATCCTTCTCCA-AAATGTAAGCATAAGCCAGAATGAAC  
CCCTCACTGGCAATTAAGTCAATAAAACCCTAGAAGTAACTTA----TCAAGAAAACCC  
TTC-----TACTGTA-AACGTTAACCTTACACCAGCACATTTCTGGA  
AAGAAAAAAGAGGGGGAAGGAACCTCGGCAAATAATTTAACCCCGCCTGTTTACCAAAA



CATCGCCTCTTGCTAACT----ATAAGAGGTCCAGCCTGCCAGTGACAAA--GTTAAAC  
GGCCGCGGTACCCTAACCGTGCAAAGGTAGCGCAATCACTTGTTCTTTAAATGAGGACTA  
GTATGAACGGCATCACGAGGGTTATACTGTCTCCCCCTTTTTTCAGTGAAACTGATCTT  
CCCGTGAAGAAGCGGGAATATTAATATAAGACGAGAAGACCCCATGGAGCTTTAAACTCA  
GAATCAACTGCCACAAA--CTTAACCTAATAACTAT-GCAG-GAATGAC-TTCTAGTTTT  
CGGTTGGGGTGACCGCGGAGTAAAATAAAACCTCCACGACGAAAGGAACTAACCACCTAA  
ACCAAGAGCCACAGCTCTAAGTATTAAA-----ACATTAACCTAA-TTGATCCAATT  
ACTT--GATCAACGAACCAAGTTACCCTGGGGATAACAGCGCAATCCATTTCAAGAGCTC  
ATATCGACAAATGGGTTTACG-ACC-TCGATGTTGGATCAGGATATCCTAGTG-GCGCAG  
CCGCTA-CTAA-CGGTTC

>M. berdmorei MN534713, MN534606

TTATCATCAGCTTACCCCTAACTTACACATGCAAGTATCAGCACACCCGTGAGAACGCC  
TTAAACCTT-ACTAGGACAAGGAGCCGGTATCAGGCACAG---ATTA-----TCTAGCCC  
ATGACACCTAGCTTTGCCACTCCCTCAAGGGTATTTCAGCAGTGATTAACATTGTTTCATAA  
GCGCCAGCTTGACTCAGTTAAGGGGTAT--AGAGCCGGCCAATACGGTGCCAGCCGCCGC  
GGCTACACCGCTAGGCTCAAGTTGATTTT-ATGCGGCGTTAAGCGTGTTTAAAGTGCTA-  
AAAA-GATTAGAATTAATAATAACCAAGCTGTGACACGCTTGTTAGTAAGAAAAACAAA  
TACGAAAGTTATTCTAACCAACCCACTTGAACCCACGACAGCTAAGACACAAACTGGGAT  
TAGGTACCCCACTATGCCTAGCCGTAAAATATTTATTTACACCT-TTAACCGCCCGGGAA  
TTACGAGCCCAAGCTTAAAACCCAAAGGACTTGACGGTGTCCCACCCACCTAGAGGAGCC  
TGTTCTATAA-TCGATTCTCCCC-GATATACCTCACCGCTTCTAGCTTT-TTCAGCCTGT  
ATACCTCCGTCGTAAGCTTACCCTATGAACGCT-TTTTAGTGAGCTAAAAGAT-CTTTAC  
ATAAATACGTCAGGTCAAGGTGCAGCCTACGAAGCGGCAAGAAATGGGCTACAATTTCTA  
CAA---TAGAACACAACGAAAGACTACATGCAA-CTTAGTCATGAAGGCGGATTTAGTAG  
TAAAAGAAAATAGAGAGTTCTTTTTAATCAGGCGCTGGGACGCGTACACACCGCCCGTC  
ACCCTCTTCAAACGCTTAA-ACCTAG-TTTATAACAAA-TTTCTGCACCACAGAAGAGGT  
AAGTCGTAACATGGTAAGCGTACTGGAAAGTGCGCTTGAATAA-CAAATGTAGCTTAA  
CTAAA-GCATCTCGCTTACACCGAGAACATGTCTGTGAAACCCTGATCGTTTTTGA--GCT  
AAAAATCTAGCTCTT--CTTATTCT-TATGAATACCC-CACCTTTT-AACCAA---TAAA  
TAAATCATTTTTTAC-ATAAAGTAAAGGCGA-----

-----AGCAG  
CCACCTTT-AAAAAAGCGTTAAAGCTTCATTG-----TTTATTAAAAAATTCATTA-AC  
TACATAAAACCCTT-AACTCTGTACTAAATAATTTTATAACTATATAAAAGCCCGTATGT  
TGGAAGTAGTAACAAGAAGA-AATCCTTCTCCA-AAATGTAAGCATAAGCCAGAATGAAC  
CCCTCACTGGCAATTAAAGTCAATAAAACCCTAGAAGTAACTTA----TCAAGAAAACCC  
TTC-----TACTGTA-AACGTTAACCTTACACCAGCACATTTCTGGA  
AAGAAAAAAGAGGGGGAAGGAAGTTCGGCAAATAATTTAACCCCGCTGTTTACCAAAAA  
CATCGCCTCTTGCTAACT----ATAAGAGGTCCAGCCTGCCAGTGACAAA--GTAAAC  
GGCCGCGGTACCCTAACCGTGCAAAGGTAGCGCAATCACTTGTTCTTTAAATGAGGACTA  
GTATGAACGGCATCACGAGGGTTATACTGTCTCCCCCTTTTTTTCAGTGAAACTGATCTT  
CCCGTGAAGAAGCGGGAATATTAATATAAGACGAGAAGACCCCATGGAGCTTTAAACTCA  
GGATCAACTGCCACAAA--CTTAACCTAATAACCAT-GCAG-GAATGAC-TTCTAGTTTT  
CGGTTGGGGTGACCGCGGAGTAAATAAAACCTCCACGACGAAAGGAACTAACCGCCTAA  
ACCAAGAGCCACAGCTCTAAGTATTTAAA-----ACATTAACCTAA-TTGATCCAATT  
ACTT--GATCAACGAACCAAGTTACCCTGGGGATAACAGCGCAATCCATTTCAAGAGCTC  
ATATCGACAAAATGGGTTTACG-ACC-TCGATGTTGGATCAGGATATCCAAGTG-GCGCAG  
CCGCTA-CTAA-CGGTTC

>M. berdmorei MN534714, MN534505, MN534607

TTATCATCAGCTTACCCCTAACTTACACATGCAAGTATCAGCACACCCGTGAGAACGCC  
TTAAACCTT-ACTAGGACAAGGAGCCGGTATCAGGCACAG---ATTA-----TCTAGCCC  
ATGACACTTAGCTTTGCCACTCCCTCAAGGGTATTCAGCAGTGATTAACATTGTTTCATAA  
GCGCCAGCTTGACTCAGTTAAGGGGTAT--AGAGCCGGCCAATACGGTGCCAGCCGCCGC  
GGCTACACCGCTAGGCTCAAGTTGATTTT-ATGCGGCGTTAAGCGTGTTTAAAGTGCTA-  
AAAA-GATTAGAATTTAAATATAGCCAAGCTGTGACACGCTTGTTAGTAAGAAAAACAGA

TACGAAAGTTATTCTAACCAACCCACTTGAACCCACGACAGCTAAGACACAAACTGGGAT  
TAGGTACCCCACTATGCCTAGCCGTAAAAATATTTATTTACACCT-TTAACCGCCCGGAA  
TTACGAGCCCAAGCTTAAAACCCAAAGGACTTGACGGTGTCCCACCCACCTAGAGGAGCC  
TGTTCTATAA-TCGATTCTCCCC-GATATACCTCACCGCTTCTAGCTTT--TCAGCCTGT  
ATACCTCCGTCGTAAGCTTACCCTATGAACGCT-TTTTAGTGAGCTAAAAGAT-CTTTAC  
ATAAATACGTCAGGTCAAGGTGCAGCCTACGAAGCGGCAAGAAATGGGCTACAATTTCTA  
CAA---TAGAACACAACGAAAGACTACATGCAA-CTTAGTCATGAAGCGGATTTAGTAG  
TAAAAAGAAAATAGAGAGTTCCTTTTTAACCAGGCGCTGGGACGCGTACACACCGCCCGTC  
ACCCTCTTCAAACGCTTAA-AACCAG-TTTATAACAAA-TTTCTGCACCACAGAAGAGGT  
AAGTCGTAACATGGTAAGCGTACTGGAAAGTGCCTTGAATAA-CAAATGTAGCTTAA  
CTAAA-GCATCTCGCTTACACCGAGAACATGTCTGTGAAACCCTGATCGTTTTTGA--GCT  
AAAAATCTAGCTCTT--CTTATTCT-TATGAATACCC-CACCTTTT-AACCAA---TAAA  
TAAATCATTTTTTAC-ATAAAGTAAAGGCGATAGAAAAATGCCTA-GAAGCTATAGAAAA  
CAGTACCGCAAGGAAAGATGAAATATTAATGAAAA--TTGCAAGCACCAAAAAGCAGA  
GCTGTAACCTCGTACCTTTTGCATCATGGTCTAACTAGTCTAACCAAGCAAATGCATTT  
TTAGTTTGACCCCCGAAACTAGGTGAGCTACTTAAAAACAGCCATT-AGGGCCAACCCG  
TCTCTGTTGCAAAAGAGTGGAAGATTTT-TAAGTAGGGGTGACAGACCTATCGAACCTA  
GAGATAGCTGGTTATTTAGGAAAAGGATTTAAGTCCTACCTTAAAATTTTT-ATACC---  
-----  
-----  
-----TT-AAAAAGCGTTAAAGCTTCATTG----TTTAAATTAAAAAATTTTCATTA-AC  
TACATAAAACCCTT-AACTCTGTACTAAATAATTTTATAACTGTATAAAAGCCCATATGT  
TGGAAGTAGTAACAAGAAGA-AACCCTTCTCCA-AAATGTAAGCATAAGCCAGAATGAAC  
CCCTCACTGGCAATTAAGTCAATAAAACCCTAGTAGTAACTCA----TCAAGAAAACCC  
TTC-----TATTGTA-AACGTTAACCTTACACCAGCACATTTCTGGA  
AAGAAAAAAGAGGGGGAAGGAAGTTCGCAATAATTTAACCCCGCCTGTTTACCAAAAA  
CATCGCCTCTTGCTAACT----ATAAGAGGTCCAGCCTGCCAGTGACAAA--GTAAAC  
GGCCGCGGTACCCTAACCGTGCAAAGGTAGCGCAATCACTTGTTCCTTTAAATGAGGACTA  
GTATGAACGGCATCACGAGGGTTATACTGTCTCCCCCTTTTTTTCAGTGAAACTGATCTT  
CCCGTGAAGAAGCGGGAATATTAATATAAGACGAGAAGACCCCATGGAGCTTTAAACTCA

GAATCAACTGCCACAAA--CTTAACCTAATAACTAT-GCAG-AAGTGAC-TTCTAGTTTT  
CGGTTGGGGTGACCGCGGAGTAAAATAAAACCTCCACGACGAAAGGAATTAACCACCTAA  
ACCAAGAGCCACGGCTCTAAGTATTAAA-----ACATTAACCTAA-TTGATCCAATT  
ACTT--GATCAACGAACCAAGTTACCCTGGGGATAACAGCGCAATCCATTTCAAGAGCTC  
ATATCGACAAATGGGTTTACG-ACC-TCGATGTTGGATCAGGATATCCAAGTG-GCGCAG  
CCGCTA-CTAA-CGGTTC

>M. pulchra MN534715, MN534508, MN534608

TTATTATCAGCTTATCCTTAACTTACACATGCAAGTATCAGCACACCCGTGAGAACGCC  
TTAAACCTT-ACTAGGACAAGGAGCCGGTATCAGGCACAG---ACCCA---TCTAGCCC  
ATTACACCTAGCTTTGCCACTCCCTCAAGGGTCTTCAGCAGTGATTAACATTGTTTCATAA  
GCGACAGCTTGACTCAGTTAAAGGACAC--AGGGCCGGCTAATACGGTGCCAGCCGCCGC  
GGCTACACCGCTAGGCTCAAGTTGATATT-ATTCGGCGTTAAGCGTGTTTAAAGTGCTT-  
TTCAAGATTAGAACTAAACCCTAACCAAGCTGTGACACGCTTGCTATCAGGAAAAACAAA  
TACGAAAGTTATTCTAACCCACCCACTTGAACCCACGACAGCTAGGACACAACTGGGAT  
TAGGTACCCCACTATGCCTAGCCGTAAAATATTTATTTACACCT-TTAACCGCCAGGGGA  
TTACGAGCCCAAGCTTAAAACCCAAAGGACTTGACGGTGTCCCACCCACCTAGAGGAGCC  
TGTTCTATAA-TCGATTCTCCCCGTTATACCTCACCCTTCTAGCTTC--TCAGCCTGT  
ATACCTCCGTCGTAAGCTTACCATATGAACGCC-TTTTAGTGAGCAAAAAGAT--TTTAC  
ATAAATACGTCAGGTCAAGGTGCAGCCTACGAAATGGCAAGAAATGGGCTACAATTTCTA  
TGAGCATAGAACAACAACGAAAGACTACATGCAA-CTTAGTCATGAAGGCGGATTTAGTAG  
TAAAAGAAAAATAGAGAGTTCTTTTTAATCAGGCGCTGGGACGCGTACACACCCGCCCGTC  
ACCCTCTTCAAACGCTTAA-ACTCAG-TTTATAACGAA-CTCATGCACCACAGAAGAGGT  
AAGTCGTAACATGGTAAGCGTACTGGAAAAGTGCCTTGGAAATAAACAAAATGTAGCTTAA  
CTAAA-GCATCTCGCTTACACCGAGAACATGTCCGTGAAACTCAGATCATTTTTGA--GCC  
AAAAATCTAGCTCCC--CTAAACCT-AATGAACCTCC-CA-CAATT-CAAATA--CCAAA  
TAAAACATTTTGTAC-ATAAAGTATAGGCGATAAAAAAATGTCTA-GAAGCAATAGAG-T  
TAGTACCGTAAGGGAATGATGAAATAATAATGAAAA--CTGCAAGCACAAAAAAGTAGA  
GCTACAACCTCGTACCTTTTGCATCATGGTCTAACGAGTCCAACCAAGCAAATGCACTT  
TAAGTTTGACCCCCGAAACTAGGTGAGCTACTCAAAAACAGCCTTT-AGGGCCAACCCG  
TCTCTGTTGCAAAAGAGTGGGAAGATTCT-TGAGTAGGGGTGACAGACCTATCGAACCTA

GAGATAGCTGGTTATTTCAGAAAAAGGATTTAAGTCCTGCCTTAAGGTTTTCCGTATAATC  
--GAGCACTTTTTT-AACCTTAAGAGTTATTCAAATAAGGTACAGCCTATTTGAATTAGG  
ATACAACCTCTATCAA-----  
-----TT-AAAAAGCGTTAAAGCTTTATTA---TTTTATTTAAAAA-TTCCCCCA-AC  
TTTCTATAACCCTT-AACTTTGTACTGAATAATTTTATATTAATATAAAAACTTTTATGT  
TAGAACTAGTAACAAGAAGC-AGCCCTTCTCCA-AAATGTAAGTTTAAGCCAAAATGAAC  
AACTCATTGGCAATTAAGTCATTAACCTCTAGTAGTAACCCCC---TCAAGAAAAATC  
TAC-----TATATTTCAACGTTAATCTTACACTAGAACATTTCTGGA  
AAGATAAAAAGAATGGGAAGGAACCTCGGCAAACAACCTTAACCCCGCCTGTTTACCAAAAA  
CATCGCCTCTTGATAACCC---ATAAGAGGTCCAGCCTGCCAGTGACAAA--GTAAAC  
GGCCGCGGTACCCTAACCGTGCAAAGGTAGCGCAATCACTTGTTCTTTAAATGAGGACCG  
GTATGAACGGCATCACGAGGGTTATACTGTCTCCCCACTCAACTCAGTGAAACTGATCTT  
CCCGTGAAGAAGCGGAATAAAAATATAAGACGAGAAGACCCCATGGAGCTTAAACTCA  
GAATCAACTGCCACATT--TACAACCTCATAACCAC-GCAG-CCATGAC-CTCTAGTTTT  
CGGTTGGGGTGACCGCGGAGTAAACACAACCTCCATGATGAAAGGAACTAATACCCTAA  
TCTAAGGGCGACAGCCCTAAGAATTAAT-----ACATTAACCCAA-TTGATCCAATA  
ACTT--GATCAACGAACCAAGTTACCCTGGGGATAACAGCGCAATCCATTTCAAGAGCTC  
ATATCGACAAAATGGGTTTACG-ACC-TCGATGTTGGATCAGGATATCCCAGTG-GCGCAG  
CCGCTA-CTAA-CGGTTC

>M. pulchra MN534716, MN534507, MN534609

TTATTATCAGCTTATCCTTAACCTACACATGCAAGTATCAGCACACCCGTGAGAACGCC  
TTAAACCTT-ACTAGGACAAGGAGCCGGTATCAGGCACAG---ACCCA----TCTAGCCC  
ATTACACCTAGCTTTGCCACTCCCTCAAGGGTCTTCAGCAGTGATTAACATTGTTTATAA  
GCGACAGCTTGACTCAGTTAAAGGACAC--AGGGCCGGCTAATACGGTGCCAGCCGCCGC  
GGCTACACCGCTAGGCTCAAGTTGATATT-ATTGGCGTTAAGCGTGTTTAAAGTGCTT-  
TTCAAGATTAGAACTAAACCCTAACCAAGCTGTGACACGCTTGCTATCAGGAAAAACAAA  
TACGAAAGTTATTCTAACCCACCCACTTGAACCCACGACAGCTAGGACACAACTGGGAT  
TAGGTACCCCACTATGCCTAGCCGTAAAATATTTATTTACACCT-TTAACCGCCAGGGGA  
TTACGAGCCCAAGCTTAAACCCAAAGGACTTGACGGTGTCCCACCCACCTAGAGGAGCC  
TGTTCTATAA-TCGATTCTCCCCGTTATACCTCACCCTTCTAGCTTC--TCAGCCTGT

ATACCTCCGTCGTAAGCTTACCATATGAACGCC-TTTTAGTGAGCAAAAAGAT--TTTAC  
ATAAATACGTCAGGTCAAGGTGCAGCCTACGAAATGGCAAGAAATGGGCTACAATTTCTA  
TGAGCATAGAACACAACGAAAGACTACATGCAA-CTTAGTCATGAAGGCGGATTTAGTAG  
TAAAAAGAAAATAGAGAGTTCTTTTTAATCAGGCGCTGGGACGCGTACACACCGCCCGTC  
ACCCTCTTCAAACGCTTAA-ACTCAG-TTTATAACAAA-CTCATGCACCACAGAAGAGGT  
AAGTCGTAACATGGTAAGCGTACTGGAAAGTGCGCTTGAATAAACAAAATGTAGCTTAA  
CTAAA-GCATCTCGCTTACACCGAGAACATGTCCGTGAAACCCAGATCATTTTTGA--GCC  
AAAAATCTAGCTCCC--CTCAACCT-AATGAACCCCC-CA-CAATT-CAAATA--TTTAA  
TAAAACATTTTATAC-ATAAAGTATAGGCGATAAAAAAATGTCTA-GAAGCAATAGAG-T  
TAGTACCGTAAGGGAATGATGAAATAATAATGAAAA--CTGCAAGCACAAAAAAGTAGA  
GCTACAACCTCGTACCTTTTGCATCATGGTCTAACGAGTCCAACCAAGCAAAATGCACCTT  
TAAGTTTGACCCCCGAAACTAGGTGAGCTACTCAAAAACAGCCTTT-AGGGCCAACCCG  
TCTCTGTTGCAAAAGAGTGGGAAGATTCT-TGAGTAGGGGTGACAGACCTATCGAACCTA  
GAGATAGCTGGTTATTCAGAAAAAGGATTTAAGTCCTGCCTTAAGATTTCCCGTACAATC  
--GAGCACTTTTTT-AACCTTAAGAGTTATTCAAATAAGGTACAGCCTATTTGAATTAGG  
ATACAACCTCCATCAA-----  
-----TT-AAAAAAGCGTTAAAGCTTTATTA--TTTTCTTTAAAAAATTCCTCA-AC  
TTTCTATAACCTT-AACTTTGTAAGTAATAATTTTATATTAGTATAAAAACCTTTTATGT  
TAGAACTAGTAACAAGAAGC-AGCCCTTCTCCA-AAATGTAAGTTTAAGCCAAAATGAAC  
AACTCATTGGCAATTAAGTCATTAACCTCTAGTAGTAACCCC----TCAAGAAAAATC  
TAC-----TATATTTCAACGTTAATCTTACACTAGAACATTTCTGGA  
AAGATAAAAAGAGTGGGAAGGAACTCGGCAAACAACCTTAACCCCGCTGTTTACCAAAAA  
CATCGCCTCTTGATAACCC---ATAAGAGGTCCAGCCTGCCAGTGACAAA--GTTAAAC  
GGCCGCGGTACCCTAACCGTGCAAAGGTAGCGCAATCACTTGTTCTTTAAATGAGGACCG  
GTATGAACGGCATCACGAGGGTTATACTGTCTCCCACTCAACTCAGTGAAACTGATCTT  
CCCGTGAAGAAGCGGAATAAAAATATAAGACGAGAAGACCCCATGGAGCTTAAACTCA  
GAATCAACTGCCACATT--TACAACCTCATAACCAC-GCAG-CCATGAC-CTCTAGTTTT  
CGGTTGGGGTGACCGCGGAGTAAAACACAACCTCCATGATGAAAGGAACTAATACCCTAA  
TCTAAGGGCGACAGCCCTAAGAATTAAT-----ACATTAACCCAA-TTGATCCAATC  
ACTT--GATCAACGAACCAAGTTACCCTGGGGATAACAGCGCAATCCATTTCAAGAGCTC

ATATCGACAAATGGGTTTACG-ACC-TCGATGTTGGATCAGGATATCCCAGTG-GCGCAG  
CCGCTA-CTAA-CGGTTC

>M. pulchra MN534717, MN534506, MN534610

TTATTATCAGCTTATCCTTAACCTTACACATGCAAGTATCAGCACACCCGTGAGAACGCC  
TTAAACCTT-ACTAGGACAAGGAGCCGGTATCAGGCACAG---ACCCA----TCTAGCCC  
ATTACACCTAGCTTTGCCACTCCCTCAAGGGTCTTCAGCAGTGATTAACATTGTTTATAA  
GCGACAGCTTGACTCAGTTAAAGGACAT--AGGGCCGGCCAATACGGTGCCAGCCGCCGC  
GGCTACACCGCTAGGCTCAAGTTGATATT-ATTCGGCGTTAAGCGTGTTTAAAGTGCTT-  
TTCAAGATTAGAACTAAACCCTAACCAAGCTGTGACACGCTTGCTATCAGGAAAAACAAA  
TACGAAAGTTATTCTAACCCACCCACTTGAACCCACGACAGCTAGGACACAACTGGGAT  
TAGGTACCCCACTATGCCTAGCCGTAAAATATTTATTTACACCT-TTAACCGCCAGGGGA  
TTACGAGCCCAAGCTTAAAACCCAAAGGACTTGACGGTGTCCCACCCACCTAGAGGAGCC  
TGTTCTATAA-TCGATTCTCCCCGTTATACCTCACCCTTCTAGCTTC--TCAGCCTGT  
ATACCTCCGTCGTAAGCTTACCATATGAACGCC-TTTTAGTGAGCAAAAAGAT--TTTAC  
ATAAATACGTCAGGTCAAGGTGCAGCCTACGAAATGGCAAGAAATGGGCTACAATTTCTA  
TGAGCATAGAACACAACGAAAGACTACATGCAA-CTTAGTCATGAAGGCGGATTTAGTAG  
TAAAAGAAAAATAGAGAGTTCTTTTTAATCAGGCGCTGGGACGCGTACACACCCGCCGTC  
ACCCTCTTCAAACGCTTAA-ACTCAG-TTTATAACAAA-CTCATGCACCACAGAAGAGGT  
AAGTCGTAACATGGTAAGCGTACTGGAAAAGTGCCTTGAATAAACAAAATGTAGCTTAA  
CTAAA-GCATCTCGCTTACACCGAGAACATGTCCGTGAAACTCAGATCATTTTGA--GCC  
AAAAATCTAGCTCCC--CTCAACCT-AATGAACCCCC-CA-CAATT-CAAATA--CTAAA  
TAAAACATTTTATAC-ATAAAGTATAGGCGATAAAAAAATGTCTA-GAAGCAATAGAG-T  
TAGTACCGTAAGGGAATGATGAAATAATAATGAAAA--CTGCAAGCACAAAAAAGTAGA  
GCTACAACCTCGTACCTTTTGCATCATGGTCTAACGAGTCCAACCAAGCAAATGCACTT  
TAAGTTTGACCCCCGAACTAGGTGAGCTACTCAAAAACAGCCTTT-AGGGCCAACCCG  
TCTCTGTTGCAAAAGAGTGGGAAGATTCT-TGAGTAGGGGTGACAGACCTATCGAACCTA  
GAGATAGCTGGTTATTCAGAAAAAGGATTTAAGTCTGCCTTAAGATTTTACGTACAATC  
--GAGCACTTTTTT-AACCTTAAGAGTTATTCAAATAAGGTACAGCCTATTTGAATTAGG  
ATACAACCTCCATCAA-----  
-----TT-AAAAAGCGTTAAAGCTTTATTAA--TTTTCTTTAAAAAATTCCTCA-AC

TTTCTATAACCCTT-AACTTTG TACTGAATAATTTTATATTAATATAAAAACTTTTATGT  
TAGAACTAGTAACAAGAAGC-AGCCCTTCTCCA-AAATGTAAGTTTAAGCCAAAATGAAC  
AACTCATTGGCAATTAAGTCATTAACCTCTAGTAGTAACCCC----TCAAGAAAAATC  
TAC-----TGTATTTCAACGTTAATCTTACACTAGAACATTTCTGGA  
AAGATAAAAAGAATGGGAAGGAAC TCGGCAAACAACCTTAACCCCGCCTGTTTACCAAAAA  
CATCGCCTCTTGATAACCC---ATAAGAGGTCCAGCCTGCCAGTGACAAA--GTAAAC  
GGCCGCGGTACCCTAACCGTGCAAAGGTAGCGCAATCACTTGTTCTTTAAATGAGGACCG  
GTATGAACGGCATCACGAGGGTTATACTGTCTCCCCACTCAACTCAGTGAAACTGATCTT  
CCCGTGAAGAAGCGGGAATAAAAATATAAGACGAGAAGACCCCATGGAGCTTAAACTCA  
GAATCAACTGCCACATT--TATAACCTCATAACCAC-GCAG-CCATGAC-CTCTAGTTTT  
CGGTTGGGGTGACCGCGGAGTAAACACAACCTCCATGATGAAAGGAACTAATACCCTAA  
TCTAAGGACGACAGCCCTAAGAATTAAT-----ACATTAACCCAA-TTGATCCAATC  
ACTT--GATCAACGAACCAAGTTACCCTGGGGATAACAGCGCAATCCATTTCAAGAGCTC  
ATATCGACAAATGGGTTTACG-ACC-TCGATGTTGGATCAGGATATCCCAGTG-GCGCAG  
CCGCTA-CTAA-CGGTTC

>M. picta MN534718, MN534509, MN534611

TTATTGTCATCTCTCCCCAACTTACACATGCAAGTATCAGCACACCCGTGAGAACGCC  
TTGAACCTT-TTTAGGACAAGGAGCCGGTATCAGGCACAG---ACT-----CCTGGCCC  
ATAACACCTAGCTTTGCCACTCCCTCAAGGGTATT CAGCAGTGATTAACATTGTTTCATAA  
GCGCCAGCTTGATT CAGTCAGGGGGCAC--AGAGCCGGCCAATACGGTGCCAGCCGCCGC  
GGCTACACCGCTAGGCTCAAGCTGACATT-ATTCGGCGTTAAACGTGTTTAAAGTGCCT-  
TAAA-GATTAGAGTTAAACTTCAACCAAGCCGTGACACGCTTGTTATTAAGAAACCCACA  
CACGAAAGTTACTCTAACAAACCCACTTGAATCCACGACAGCTAGGACACAAACTGGGAT  
TAGGTACCCCACTATGCCTAGCCGTAAAATATCCACTCACACCT-TTAACCGCCAGGGAA  
TTACGAGCCCAAGCTTAAACCCAAAGGACTTGACGGTGCCCCACCCACCTAGAGGAGCC  
TGTTCTATAA-TCGATTCTCCCC-GATAAACCCACCACTTCTAGCCTC--TCAGCCTGT  
ATACCTCCGTTCGTAAGCTTACCCTATGAATGCC-TTTTAGTGAGCAAAATGAT-TTGTCC  
ATAAATACGTCAGGTCAAGGTGCAGCCTACGAAGTGGTAAGAAATGGGCTACAATTTCTA  
CAAG--TAGAACCAAACGAAAGACTACATGAAA-CCTGGTCATGAAGCGGATTTAGTAG  
TAAAAAGAAAATAGAGAGTTCTTTTTAATTCGGCAATGGGGCGCGTTCACACCGCCCGTC



ACCCTCTTCAAATGCCTAA-AATCAG-TTTTTAACTAA-CTACTGCACCATAGAAGAGGT  
AAGTCGTAACATGGTAAGCGTACTGGAAAAGTGCCTTGGAAATAA-CCAAATGTTGCTTAA  
CCAAA-GCCTCTCGCTTACCCCGAGAAGATATCCGTGAAACTCAGATCATCTTGA--GCT  
AAAACTTAGCTCTT--CTAAACCC-TATGAATACCC-CCCCCA--AAAAA--TAAAA  
TAAACATTTTATAC-TTTAAGTAAAGGCGATAAAAAAATGTCTA-GAAGCTATAGAAAC  
TAGTACCGCAAGGAAAAGTGAATAATAATGAAAA--CCTCAAGCACAATAAAGCAGA  
GCTTAAGCCTCGTACCTTTTGCATCATGGTCTAACTAGTCTAACCAAGCACAAAGTACTT  
TAAGTTTGACCCCCGAAACTAGGTGAGCTACTCAAAAACAGCCTCT-AGGGCCAACCCG  
TCTCTGTTGCAAAAGAGTGGAAGATTTT-TGAGTAGCGGTGACAGACCTATCGAACCTA  
GAGATAGCTGGTTATTCAGAAAAAGGATTTTAGTCCTGCCTTAAGTTTCCAAGTACTTTT  
--TAATACCACACG-AACCTTAAGAGTTATTCAAATAAGGTACAGCCTATTTGAAACAGG  
GTACAACCTCCGC-----AAAGCAG  
CCACCTTCT-AAAAAGCGTTAAAGCTTTATTA--CTTCACTAAAAA-TTCCTCTA-AC  
TACTTAAAACCTC--ACTCTGTAAGTGAATAATTTTATAGAACTATAAAAACTATTATGT  
TAGAACTAGTAACAAGAAGA-AACCCTTCTCCAAAAATGTAAGCATAGGCCAAAATGAAT  
AATTCATTGGCAGTTAAAGTTTTTAAGCCCATAGTAGCAACTTA----CCAAGAAAAACC  
TAC-----TACTTCAACGTTAACCTTACACCAGCACATTTCTGGA  
AAGATTAAAAGAATGGGAAGGAACTCGGCAAATA--TAACCCCGCCTGTTTACCAAAAA  
CATCGCCTCTTGATACCC----ATAAGAGGTCCAGCCTGCCAGTACTAA--GTTAAAC  
GGCCGCGGTACCCTAACCGTGCAAAGGTAGCGCAATCACTTGTTCTTTAAATGAGGACTA  
GTATGAATGGCATCACGAGGGTTACTACTGTCTCCCACTCAACTCAGTGAAACTGATCTT  
CCCGTGAAGAAGCGGGAATAAAAAATATAAGACGAGAAGACCCCATGGAGCTTAAAACTCA  
GAGTTAACTGCCACTTC--TTTAGCCTAGTACCCAC-GCAG-AAATAAC-TTCTAGTTTT  
CGGTTGGGGTGACCGCGGAGTAAAACACAACCTCCACGAAGAAAGGAACCTTATACCCTAA  
TCCAAGAGCTACAGCTCTAAGAATTAAA-----ACATTAACCTAA-TTGATCCAAGC  
ACTT--GATCAACGAACCAAGTTACCCTGGGGATAACAGCGCAATCCATTTCAAGAGCTC  
ATATCGACAAATGGGTTTACG-ACC-TTGATGTTGGATCAGGATATCCCAGTGTGCGCAG  
C-----

>M. picta MN534719, MN534510, MN534612

TTATTGTCATCTCTCCCCAACTTACACATGCAAGTATCAGCACACCCGTGAGAACGCC

TTGAACCTT-TTTAGGACAAGGAGCCGGTATCAGGCACAG---ACT-----CCTGGCCC  
ATAACACCTAGCTTTGCCACTCCCTCAAGGGTATTCAGCAGTGATTAACATTGTTTCATAA  
GCGCCAGCTTGATTCAGTCAGGGGGCAC--AGAGCCGGCCAATACGGTGCCAGCCGCCGC  
GGCTACACCGCTAGGCTCAAGCTGACATT-ATTCGGCGTTAAACGTGTTTAAAGTGCCT-  
TAAA-GATTAGAGTTAAACTTCAACCAAGCCGTGACACGCTTGTTATTAAGAAACCCACA  
CACGAAAGTTACTCTAACAAACCCACTTGAATCCACGACAGCTAGGACACAACTGGGAT  
TAGGTACCCCACTATGCCTAGCCGTAAAATATCCACTCACACCT-TTAACCGCCAGGGAA  
TTACGAGCCCAAGCTTAAAACCCAAAGGACTTGACGGTGCCCCACCCACCTAGAGGAGCC  
TGTTCTATAA-TCGATTCTCCCC-GATAAACCCCACTTCTAGCCTC--TCAGCCTGT  
ATACCTCCGTCGTAAGCTTACCCTATGAATGCC-TTTTAGTGAGCAAAATGAT-TTGTC  
ATAAATACGTCAGGTCAAGGTGCAGCCTACGAAGTGGTAAGAAATGGGCTACAATTTCTA  
CAAG--TAGAACACAACGAAAGACTACATGAAA-CATGGTCATGAAGGCGGATTTAGTAG  
TAAAAGAAAATAGAGAGTTCTTTTTAATCCGGCACTGGGGCGCGTACACACCGCCCGTC  
ACCCTCTTCAAATGCCTAA-AATCAG-TTTATAACTAA-CTACTGCACCATAGAAGAGGT  
AAGTCGTAACATGGTAAGCGTACTGGAAAGTGCCTTGAATAA-CAAATGTAGCTTAA  
CCAAA-GCATCTCGCTTACACCGAGAAGATATCCGTGAAACTCAGATCATCTTGA--GCT  
AAAAACTTAGCTCTT--CTAAACCC-TATGAATACCC-CCCCCA--AAAAA--TAAAA  
TAAAACATTTTATAC-TTTAAGTAAAGGCGATAAAAAAATGTCTA-GAAGCTATAGAAAC  
TAGTACCGCAAGGGAAAAGTGAATAATAATGAAAAA--CCTCAAGCACAATAAAGCAGA  
GCTTAAGCCTCGTACCTTTTGCATCATGGTCTAACTAGTCTAACCAAGCACAAAGTACTT  
TAAGTTTGACCCCCGAAACTAGGTGAGTACTCAAAAAACAGCCTCT-AGGGCCAACCCG  
TCTCTGTTGCAAAAGAGTGGAAGATTTT-TGAGTAGCGGTGACAGACCTATCGAACCTA  
GAGATAGCTGGTTATTCAGAAAAAGGATTTTAGTCCTGCCTTAAGTTTCCAAGTACTTTT  
--TAATACCACACG-AACCTTAAGAGTTATTCAAATAAGGTACAGCCTATTTGAAACAGG  
GTACAACATCCGC-----TTAAAGCAG  
CCACCTTCT-AAAAGCGTTAAAGCTTTATTAA--CTTCACTAAAAA-TTCCTCTA-AC  
TACTTAAAACCTC--ACTCTGTACTGAATAATTTTATAGAACTATAAAAACTATTATGT  
TAGAACTAGTAACAAGAAGA-AACCCTTCTCCAAAAATGTAAGCATAGGCCAAAATGAAT  
AATTCATTGGCAGTTAAAGTTTTTAAGCCCATAGTAGCAACTTA----CCAAGAAAACC  
TAC-----TTACTTCAACGTTAACCTTACACCAGCACATTTCTGGA

AAGATTA AAAAGAATGGGAAGGAACTCGGCAA ACTA--TAACCCCGCCTGTTTACCAAAAA  
CATCGCCTCTTGATACCC----ATAAGAGGTCCAGCCTGCCAGTGACTAA--GTTAAAC  
GGCCGCGGTACCCTAACCGTGCAAAGGTAGCGCAATCACTTGTTCTTTAAATGAGGACTA  
GTATGAATGGCATCACGAGGGTTACTGTCTCCCCACTCAACTCAGTGAAACTGATCTT  
CCCGTGAAGAAGCGGGAATAAAAATATAAGACGAGAAGACCCCATGGAGCTTAAACTCA  
GAGTTAACTGCCACTTC--TTTAGCCTAGTACCCAC-GCAG-AAATAAC-TTCTAGTTTT  
CGGTTGGGGTGACCGCGGAGTAAACACAACCTCCACGAAGAAAGGAACTTATACCCTAA  
TCCAAGAGCTACAGCTCTAAGAATTAAA-----ACATTAACCTAA-TTGATCCAAGC  
ACTT--GATCAACGAACCAAGTTACCCTGGGGATAACAGCGCAATCCATTTCAAGAGCTC  
ATATCGACAAATGGGTTTACG-ACC-TTGATGTTGGATCAGGATATCCCAGTGTGCGCAG  
C-----

>M. nilphamariensis MN534720, MN534613

-----ACAGCTCCCTCTAAATTTACACATGCAAGTATCAGCATAACCCGTGAGAACGCC  
TTTAACCTT-TATAGGACAAGGAGCCGGTATCAGGCACAG---ACAA-----CTAGCCC  
ATGACACCTAGCTTTGCCACACCCTCAAGGGTACTCAGCAGTGATTAACATTGTTTATAC  
GCGCCAGCTTGAATCAGTTACAGAGCAA--AGAGCCGGCCAATACGGTGCCAGCCGCCGC  
GGCTACACCGCTAGGCTCAAGTTGATATT-ATCCGGCGTTAAGCGTGTTTAAGTGCCT-  
AAAA-AATTAGAATTAAACTTAAACCAAGCCGTGACACGCTTGTTCCCTAAGAAAAACAAA  
AACGAAAGTTATTCTAACCCAACCACTTGAACCCACGACAGCTAGGGCACAAACTGGGAT  
TAGGTACCCCACTATGCCTAGCCGTAAACATACTTACACCT-TTAATCGCCAGGGAA  
TTACGAGCCCTAGCTTAAACCCAAAGGACTTGACGGTGTCCCACCCACCTAGAGGAGCC  
TGTTCTATAA-TCGATTCCCCC-----

-----  
-----  
-----  
-----  
-----  
-----  
-----  
-----  
-----  
-----





CCCGTGAAGAAGCGGGAATATAAATATAAGACGAGAAGACCCCATGGAGCTTTAAACTCA  
GTGTCATCTGCCACTTC--AATACCCTCTTAATTAC-GCAGACCATGAT-AACTAGTTTT  
CGGTTGGGGTGACCGCGGAGTAAAACAAAACCTCCACAACGAAAGGAACCTAACCAACCTAA  
TCCAAGAGCAACATCTCTAAGAATCAAC-----AAATTGACTTAA-TTGATCCAATT  
ACTT--GATCAACGAACCAAGTTACCCTGGGGATAACAGCGCAATCCATTTCAAGAGCTC  
ATATCGACAAATGGGTTTACG-ACC-TCGATGTTGGATCAGGGTATCCCAGTG-GCGCAG  
CAGCTA-CTAA-CGGTTC

>M. ornata MN534722, MN534511, MN534615

TTATTATCAGCTTCCTCTAAACTTACACATGCAAGTATCAGCATAACCCGTGAGAACGCC  
TTCAACCTT-AATAGGACAAGGAGCTGGTATCAGGCACAG---ACAA-----CTAGCCC  
ATAACACCTAGCTTTGCCACACCCCCAAGGGTACTCAGCAGTGATTAACATTGTTTCATAA  
GCGCCAGCTTGACTCAGTTATAGAGTGT--AGAGCCGGCCAATACGGTGCCAGCCGCCGC  
GGCTACACCGCTAGGCTCAAGTTGATATT-ATCCGGCGTTAAGCGTGTTTTAAGT-ACT-  
AAAAAGATTAGGGTTAAACTTAAACCAAGCCGTGACACGCTTGTTCTTAAGAAAAACAAA  
AACGAAAGTTACTCTAACTAAACCACTTGAACCCACGACAGCTAGGGCACAACTGGGAT  
TAGGTACCCCACTATGCCTAGCCGTAAACGTAACCTTACACCT-TTAATCGCCAGGGGA  
TTACGAGCCCAAGCTTAAAACCAAAGGACTTGACGGTGTCCCACCCACCTAGAGGAGCC  
TGTTCTATAA-TCGATTATCCCC-GATACACCTCACCATTTTTAGCCTT--TCAGCCTGT  
ATACCTCCGTCGTAAGCTTACCATATGAACGCC-TTTCTGTGAGCTAAAAGAT--CTTTC  
ATAAGCACGTCAGGTCAAGGTGCAGCCAACGAAATGGCAAGCAATGGGCTACAATTTCTA  
GCCA--TAGAACACA-CGAAAGACTACATGCAA-TCCGGTCATGAAGGCGGATTTAGAAG  
TAAAAGAAAAATAGAGAGTTCTTTTTAATTAGGCGCTGGGACGCGTACACACCCGCCCGTC  
ACCCTCTTCAAATGCCCAA-CCTTAG-TAACTAACAAAC-CCAAAGCACACAGAAGAGGT  
AAGTCGTAACACGGTAAGCGTACTGGAAAGTGCGCTTGGATTAA-CAAATGTACTTTAA  
TTAAA-ACATTTGCTTACACCGAAAACATATCTGTTGAACTCAGATCATTTTGA--GCT  
AAAAACTTAGCTCTT--CTACATCA-AATGCCACAC-CTCTTAA-CTATTA---CTAAA  
TAAAACATTTTATCC-ATTTAGTAACGGCGATTAAAAAATGTCTA-GAAGCTATAGAAAC  
CAGTACCGCAAGGGAAAAGTGAAATAAAAAATGAAATA-TTGTAAGCATAACATAGCAGA  
GATTACCCCTCGTACCTTTTGCATCATGGTCTAACTAGTCTAACCAAGCACAAATGCATTT  
TAAGTTTGACATCCCGAAACTAGGTGAGCTACTTAAGAACAGCCTTC-AGGGCCAACCCG

TCTCTGTTGCAAAAGAGTGGGAAGATTCT-TTAGTAGAGGTGACAGACCTATCGAACCTA  
GAGATAGCTGGTTATTCAAGAAAAGGATTTTAGTCCTACCTAAGGTTCCAC-ATATA-TT  
A-TAATACACAACA-AACCTTTAGAGCTATTCAAATAAGGTACAGCCTATTTGATACAGG  
ATACAACCTCA-----  
-----TTA-AAAAAGCGTTAAAGCTTCATTG---TAAAAACCAAAA-TTCCACCA-AT  
AACTACAACCCTT-TATTTTCGTATTGAATGACTTCATACCCCTATGAAGAACTATATGT  
TAGAACTAGTAACAAGAAGACAGCCCTTCTCCA-AAATGTAAGCTTGCGCCATAATGAAC  
TAATCACTGGCACTTAAAGTCTTT--ACCAATAGTAAC-TCTTT----TCTAGAAAACCC  
TAT-----TTATTAA-TACGTCAACCTTACACAAGCACATCTCTGGA  
AAGATTAAAAGAATAGGAAGGAACCTCGGCAAATT--CTAACCCCGCCTGTTTACCAAAA  
CATCGCCTTCTGATACAC----ATAGAAGGTCCAGCCTGCCAGTACTAA--GTAAAC  
GGCCGCGGTACCCTAACCGTGCAAAGGTAGCGCAATCACTTGTTCTTTAAATGAGGACTA  
GTATGAACGGCATCACGAGGGTTATACTGTCTCCCTATTCCAATCAGTGAAACTGATCTT  
CCCGTGAAGAAGCGGAATAAATATATAAGACGAGAAGACCCCATGGAGCTTTAAACTCA  
GTACCACCTGCTATTTT--CAAATCCTATTAATCAC-GCAG-ACATGGT-AACTAGTTTT  
CGGTTGGGGTGACCGCGGAGCAAAACAAAACCTCCATAACGAAAGGAACTAACAACCTAA  
TCCAAGAGCAACATCTCTAAGAATTAAA-----AAATTAACCTTAA-TTGATCCAATT  
ACTT--GATCAACGAACCAAGTTACCCTGGGGATAACAGCGCAATCCATTTAAAGAGCTC  
TTATCGACAAAATGGGTTTACGAACC-TCGATGTTGGATCAGGGTATCCCAGTG-GCGCAG  
CAGCTA-CTAA-AGGTTT

>M. ornata MN534723, MN534512, MN534616

TTATTATCAGCTTCCTCTAAACTTACACATGCAAGTATCAGCATAACCCGTGAGAACGCC  
TTCAACCTT-AATAGGACAAGGAGCTGGTATCAGGCACAG---ACAA-----CTAGCCC  
ATAACACCTAGCTTTGCCACACCCCCAAGGGTACTCAGCAGTGATTAACATTGTTTCATAA  
GCGCCAGCTTGACTCAGTTATAGAGTGT--AGAGCCGGCCAATACGGTGCCAGCCGCCGC  
GGCTACACCGCTAGGCTCAAGTTGATATT-ATCCGGCGTTAAGCGTGTTTTAAAGT-ACT-  
AAAAAGATTAGGGTTAAACTTAAACCAAGCCGTGACACGCTTGTTCTTAAGAAAAACAAA  
AACGAAAGTTACTCTAACTAAACCACTTGAACCCACGACAGCTAGGGCACAACTGGGAT  
TAGGTACCCCACTATGCCTAGCCGTAAACGTAAACTTACACCT-TTAATCGCCAGGGGA  
TTACGAGCCCAAGCTTAAACCCAAAGGACTTGACGGTGTCCCACCCACCTAGAGGAGCC

TGTTCTATAA-TCGATTATCCCC-GATACACCTCACCATTTTTAGCCTT--TCAGCCTGT  
ATACCTCCGTCGTAAGCTTACCATATGAACGCC-TTTCTGTGAGCTAAAAGAT--CTTTC  
ATAAGCACGTCAGGTCAAGGTGCAGCCAACGAAATGGCAAGCAATGGGTTACAATTTCTA  
GCCA--TAGAACACA-CGAAAGACTACATGCAA-TCCGGTCATGAAGGCGGATTTAGAAG  
TAAAAAGAAAATAGAGAGTTCTTTTTAATTAGGCGCTGGGACGCGTACACACCGCCCGTC  
ACCCTCTTCAAATGCCCAA-CCTTAG-TAACTAACAAAC-CCACAGCACCACAGAAGAGGT  
AAGTCGTAACACGGTAAGCGTACTGGAAAGTGCCTTGGATTAA-CAAATGTACTTTAA  
TTAAA-ACATTTGCTTACACCGAATACATATCTGTTGAACTCAGATCATTTTGA--GCT  
AAAACTTAGCTCTT--CTACATCA-AATGCCACAC-CTCTTAA-CTATTA---TTAAA  
TAAAACATTTTATCC-ATTTAGTAACGGCGATTAAAAAATGTCTA-GAAGCTATAGAAAC  
CAGTACCGCAAGGAAAAGTGAATAAAAAATGAAATA-TTGTAAGCATAACATAGCAGA  
GACTACCCCTCGTACCTTTTGCATCATGGTCTAACTAGTCTAACCAAGCACAATGCATTT  
TAAGTTTGACATCCCGAAACTAGGTGAGCTACTTAAGAACAGCCTTC-AGGGCTAACCCG  
TCTGTGTTGCAAAAGAGTGGGAAGATTCT-TTAGTAGAGGTGACAGACCTATCGAACCTA  
GAGATAGGTGGTTATTCAAGAAAAGGATTTTAGTCCTACCTAAGGTTCAC-ATATA-TT  
A-TAATACACAACA-AACCTTTAGAGCTATTCAAATAAGGTACAGCCTATT-GATACAGG  
ATACAACCTCA-----  
-----TTA-AAAAAGCGTTAAAGCTTCATTG--TAAAAACCAAAA-TTCCACCA-AT  
AAACTACAACCCTT-TATTTGCTATTGAATGACTTCATACCCCTATGAAGAACTATATGT  
TAGAACTAGTAACAAGAAGACAGCCCTTCTCCA-AAATGTAAGCTTGCGCCATAATGAAC  
TAATCACTGGCACTTAAAGTCTTT--ACCAATAGTAAC-TCTTT----TCTAGAAAACCC  
TAT-----TTATTAA-TACGTCAACCTTACACAAGCACATCTCTGGA  
AAGATTAAAAGAATAGGAAGGAACCTCGGCAAATT--CTAACCCCGCTGTTTACCAAAA  
CATCGCCTTCTGATACAC----ATAGAAGGTCCAGCCTGCCAGTGACTAA--GTTAAAC  
GGCCGCGGTACCCTAACCGTGCAAAGGTAGCGCAATCACTTGTCTTTAAATGAGGACTA  
GTATGAACGGCATCACGAGGGTTATACTGTCTCCCTATTCCAATCAGTGAAACTGATCTT  
CCCGTGAAGAAGCGGGAATAAATATATAAGACGAGAAGACCCCATGGAGCTTTAAACTCA  
GTACCACCTGCTATTTT--CAAATCCTATTAATCAC-GCAG-ACATGGT-AACTAGTTTT  
CGGTTGGGGTGACCGCGGAGCAAAACAAAACCTCCATAACGAAAGGAAC TAACAACCTAA  
TCCAAGAGCAACATCTCTAAGAATTAAA-----AAATTAACCTTAA-TTGATCCAATT



ACTT--GATCAACGAACCAAGTTACCCTGGGGATAACAGCGCAATCCATTTAAAGAGCTC  
TTATCGACAAATGGGTTTACG-ACC-TCGATGTTGGATCAGGGTATCCCAGTG-GCGCAG  
CAGCTA-CTAA-AGGTTT

>M. mihintalei MN534724, MN534513, MN534617

TTATTATCAACTTTCCCTAAACTTACACATGCAAGTATCAGCACACCCGTGAGAACGCC  
TTCAACCTTTATTAGACCAAGGAGCCGGTATCAGGCACAG---TTTA-----TCTAGCCC  
ATGACACCTAGCTTTGCCACACCCTCAAGGGTACTCAGCAGTGATTAACATTGTTAATAA  
GCGCCAGCTTGACTCAGTTATAGAGAAGT-AGAGCCGGCCAATACGGTGCCAGCCGCCGC  
GGCTACACCGCTAGGCTCAAGTTGATGTT-ATCCGGCGTTAAGCGTGTTTTAAGTGATT-  
AAAA-ATTTAGAATTAACCTTAAACCAAGCCGTGACACGCTTGTTTCTAAAAAAAACAAA  
AACGAAAGTTATTCTAATCCACCCACTTGAACCCCGACAGCAAAGACACAGACTGGGAT  
TAGGTACCCCACTATGCCTAGCCGTAAAATATTTAATTACACCT-TTAACCGCCAGGGAA  
TTACGAGCTCAAGCTTAAACCCAAAGGACTTGACGGTGCCCCACCCACCTAGAGGAGCC  
TGTTCTATAA-TCGATTCCCCCGATCTACCTTACCATTTTTTAGCCTA--TCAGCCTGT  
ATACCTCCGTCGTAAGCTTACCATATGAACGCT-TTTTAGTGAGCTAAAAGAT--TTTAC  
ATAAATACGTCAGGTCAAGGTGCAGCCAACGAAATGGCAAGCAATGGGCTACAATTTCTA  
-CCA--TAGAACACA-CGAAAGACTACATGCAA-CTCAGTCATGAAGGCGGATTTAGAAG  
TAAAAGAAAAATAGAGAGTTCTTTTTTAATTAGGCGCTGGGACGCGTACACACCCGCCGTC  
ACCCTCTTCAAATGCTTTA-CTGAAG-TATATAACAAC-CCACTGCACCACAGAAGAGGT  
AAGTCGTAACACGGTAAGCGTACTGGAAAGTGCGCTTGGTTTAA-CAAAATGTACTTTAA  
TTAAA-ACATTTGCTTTACACCGAAAACATATCTGTTGAAGTCAGATCATTTTGA--GCC  
AAAAACTCAGCTCTAATTTATTTCA-AATGCATTTTC-TAATTAA-TCCACAA---CAAA  
TAAAACATTTTATCA-ATCTAGTAAAGGCGATTAATAAATTCTTA-GAAGCTATAGAAAC  
AAGTACCGCAAGGGAAAAGTGAAATAAAAAATGAAATA-TCTTAAAGCACTAAATAGCAGA  
GATTTAATCTTGACCTTTTGCATCATGGTCTAACTAGTCCAACCAAGCGAAACGCACTT  
TAAGTTTGACCCCCGAAACTAGGTGAGCTACTTAAGAACAGCCTTT-AGGGCCAACCCG  
TCTCTGTTGCAAAAGAGTGGGAAGATTCT-TTAGTAGAGGTGATAGACCTATCGAACCTA  
GAGATAGCTGGTTATTCAGGAAAAGGATTTAAGTCTACCTTAGGTTTTTT-ATACC-TT  
AAAAATACTTAATT-AACCTTAAGAGCTATTCAGATAAGGTACAGCCTATCTGAAACAGG  
ATACAACCTCAACCAA-----AAGCAG

CCACCTTT-AAGAAAGCGTTAAAGCTTCATTA---TCTTAACCAAAAA-TTCCACCA-CC  
CAAACCTAAACCCTT-AGACTTATACTGAATGACTTCATATTATTATGAAGAACTATATGT  
TAGAACTAGTAACAAGAAGT-AGACCTTCTCCAAAAATGTAAGCTTGAGCCATAATGAAC  
CCCTCACTGGCATTAAAGTATAAATTCTACTAGTAGTAACCTC---ACAAGAAAACCC  
TAC-----TTAATTA-TACGTCAATCTTACACCAGTACATTCCCTGGA  
AAGATTAAGAGTGGGAAGGAACCTCGGCAAATAA-TTAACCCCGCCTGTTTACCAAAAA  
CATCGCCTCTTGACCCC---ATAAGAGGTCCAGCCTGCCAGTGACCAA--GTAAAC  
GGCCGCGGTACCCTAACCGTGCAAAGGTAGCGCAATCACTTGTTCTTTAAATGAGGACTA  
GTATGAACGGCATCACGAGGGTTACACTGTCTCCCCTCCACTCAGTGAAACTGATCCC  
CCCGTGAAGAAGCGGGGATAAAAATATAAGACGAGAAGACCCCATGGAGCTTTAAACTCA  
GTATCATCTGCTACTAC--ATAACCAAGTAACAAC-GCAA-CAATGAC-AACTGGTTTTT  
TGTTGGGGTGACCGCGGAGTAAAACAAAACCTCCACAACGAAAGGAACATAACAACCTAA  
TCTAAGAGCGACAGCTCTAAGAATCATAT-----AAATTGACTTAA-TTGATCCAATC  
ACTT--GATCAACGAACCAAGTTACCCTGGGGATAACAGCGCAATCCATTTAAAGAGCCC  
ATATCGACAAATGGGTTTACG-ACC-TCGATGTTGGATCAGGGTATCCCAGTG-GCGCAG  
CAGCTA-CTAA-CGGTTC

>M. mihintalei MN534725, MN534514, MN534618

TTATTATCAACTTTCCCTAAACTTACACATGCAAGTATCAGCACACCCGTGAGAACGCC  
TTCAACCTTTATTAGACCAAGGAGCCGGTATCAGGCACAG---TTTA-----TCTAGCCC  
ATGACACCTAGCTTTGCCACACCCTCAAGGGTACTCAGCAGTGATTAACATTGTTAATAA  
GCGCCAGCTTGACTCAGTTATAGAGAAGT-AGAGCCGGCCAATACGGTGCCAGCCGCCGC  
GGCTACACCGCTAGGCTCAAGTTGATGTT-ATCCGGCGTTAAGCGTGT'TTAAAGTGATT-  
AAAA-ATTTAGAATTAACCTTAAACCAAGCCGTGACACGCTTGTTTCTAAGAAAAACAAA  
AACGAAAGTTATTCTAATCCACCCACTTGAACCCACGACAGCTAGGACACAACTGGGAT  
TAGGTACCCCACTATGCCTAGCCGTAAAATATTTAATTACACCT-TTAACCGCCAGGGAA  
TTACGAGCTCAAGCTTAAACCCAAAGGACTTGACGGTGCCCCACCCACCTAGAGGAGCC  
TGTTCTATAA-TCGATTCCCCCGATCTACCTTACCATTTTTAGCCTA--TCAGCCTGT  
ATACCTCCGTGTAAGCTTACCATATGAACGCT-TTTTAGTGAGCTAAAAGAT--TTTAC  
ATAAATACGTCAGGTCAAGGTGCAGCCAACGAAATGGCAAGCAATGGGCTACAATTTCTA  
-CCA--TAGAACACA-CGAAAGACTACATGCAA-CTCAGTCATGAAGGCGGATTTAGAAG

TAAAAAGAAAATAGAGAGTTCTTTTTAATTAGGCGCTGGGACGCGTACACACCGCCCGTC  
ACCCTCTTCAAATGCTTTA-CTGAAG-TATATAACAAC-CCACTGCACCACAGAAGAGGT  
AAGTCGTAACACGGTAAGCGTACTGGAAAGTGCCTTGGTTTAA-CAAAATGTACTIONTAA  
TTAAA-ACATTTGCTTACACCGAAAACATATCTGTTGAAGTCAGATCATTTTTGA--GCC  
AAAAACTCAGCTCTAATTTATTTCA-AATGCATTTTC-TAATTAA-TCCACAA---CAA  
TAAAACATTTTATCA-ATCTAGTAAAGGCGATTAAAAGATTCTTA-GAAGCTATAGAAAC  
AAGTACCGCAAGGAAAAGTGAATAAAAATGAAATA-TCTTAAAGCACTAAATAGCAGA  
GATTTAATCTTGTACCTTTTGCATCATGGTCTAACTAGTCCAACCAAGCGAAACGCCTT  
TAAGTTTGACCCCCGAAACTAGGTGAGCTACTTAAGAACAGCCTTT-AGGGCCAACCCG  
TCTCTGTTGCAAAGAGTGGGAAGATTCT-TTAGTAGAGGTGATAGACCTATCGAACCTA  
GAGATAGCTGGTTATTCAGGAAAAGGATTTAAGTCCTACCTTAGGTTTTTT-ATACC-TT  
AAAATACTTAATT-AACCTTAAGAGCTATTCAGATAAGGTACAGCCTATCTGAAACAGG  
ATACAACCTCAAC-----AAGCAG  
CCACCTTT-AAGAAAGCGTTAAAGCTTCACTA--TCTTAACCAAAAA-TTCCACCA-CC  
CAAATAAACCTT-AGACTTATACTGAATGACTTCATATTATTATGAAGAACTATATGT  
TAGAACTAGTAACAAGAAGT-AGACCTTCTCCAAAAATGTAAGCGTGAGCCATAATGAAC  
CCCTCACTGGCATTAAAGTATAAATTCTACTAGTAGTAACTTC---ACAAGAAAACCC  
TAC-----TTAATTA-TACGTCAATCTTACACCAGTACATTCTGGA  
AAGATTAAAAGAGTGGGAAGGAACTCGGCAAATAA-TTAACCCCGCCTGTTTACCAAAAA  
CATCGCCTCTTGACCCCC---ATAAGAGGTCCAGCCTGCCAGTGACCAA--GTTAAAC  
GGCCGCGGTACCCTAACCGTGCAAAGGTAGCGCAATCACTTGTCTTTAAATGAGGACTA  
GTATGAACGGCATCACGAGGGTTACACTGTCTCCCACTCCACTCAGTGAAACTGATCCC  
CCCGTGAAGAAGCGGGGATAAAAATATAAGACGAGAAGACCCCATGGAGCTTTAAACTCA  
GTATCATCTGCTACTAC--AATAACCAAGTAACAAC-GCAA-CAATGAC-AACTGGTTTT  
TGGTTGGGGTGACCGCGGAGTAAAACAAAACCTCCACAACGAAAGGAACTAACAACCTAA  
TCTAAGAGCGACAGCTCTAAGAATCATAT-----AAATTGACTTAA-TTGATCCAATC  
ACTT--GATCAACGAACCAAGTTACCCTGGGGATAACAGCGCAATCCATTTAAAGAGCCC  
ATATCGACGAATGGGTTTACG-ACC-TCGATGTTGGATCAGGGTATCCCAGTG-GCGCAG  
CAGCTA-CTAA-CGGTTC

>M. mihintalei MN534726, MN534515, MN534619

TTATTATCAACTTTCCCTAAACTTACACATGCAAGTATCAGCACACCCCGTGAGAACGCC  
TTCAACCTTTATTAGACCAAGGAGCCGGTATCAGGCACAG---TTTA-----TCTAGCCC  
ATGACACCTAGCTTTGCCACACCCTCAAGGGTACTCAGCAGTGATTAACATTGTTAATAA  
GCGCCAGCTTGACTCAGTTATAGAGAAGT-AGAGCCGGCCAATACGGTGCCAGCCGCCGC  
GGCTACACCGCTAGGCTCAAGTTGATGTT-ATCCGGCGTTAAGCGTGTTTTAAGTGATT-  
AAAA-ATTTAGAATTAACCTTAAACCAAGCCGTGACACGCTTGTTTCTAAGAAAAACAAA  
AACGAAAGTTATTTCTAATCCACCCACTTGAACCCACGACAGCTAGGACACAACTGGGAT  
TAGGTACCCCACTATGCCTAGCCGTAAAATATTTAATTACACCT-TTAACCGCCAGGGAA  
TTACGAGCTCAAGCTTAAAACCCAAAGGACTTGACGGTGCCCCACCCACCTAGAGGAGCC  
TGTTCTATAA-TCGATTTCCCCCGATCTACCTTACCATTTTTTAGCCTA--TCAGCCTGT  
ATACCTCCGTCGTAAGCTTACCATATGAACGCT-TTTTAGTGAGCTAAAAGAT--TTTAC  
ATAAATACGTCAGGTCAAGGTGCAGCCAACGAAATGGCAAGCAATGGGCTACAATTTCTA  
-CCA--TAGAACACA-CGAAAGACTACATGCAA-CTCAGTCATGAAGGCGGATTTAGAAG  
TAAAAGAAAATAGAGAGTTCTTTTTAATTAGGCGCTGGGACGCGTACACACCGCCCGTC  
ACCCTCTTCAAATGCTTTA-CTGAAG-TATATAACAAC-CCACTGCACCACAGAAGAGGT  
AAGTCGTAACACGGTAAGCGTACTGGAAAGTGCCTTGGTTTAA-CAAAATGTACTTTAA  
TTAAA-ACATTTGCTTACACCGAAAACATATCTGTTGAAGTCAGATCATTTTTGA--GCC  
AAAACTCAGCTCTAATTTATTTCA-AATGCATTTTC-TAATTAA-TCCACAA---CAA  
TAAACATTTTATCA-ATCTAGTAAAGGCGATTAAAAAATTCTTA-GAAGCTATAGAAAC  
AAGTACCGCAAGGGAAAAGTGAAATAAAAAATGAAATA-TCTTAAAGCACTAAATAGCAGA  
GATTTAATCTTGACCTTTTGCATCATGGTCTAACTAGTCCAACCAAGCGAAACGCACTT  
TAAGTTTGACCCCCGAAACTAGGTGAGCTACTTAAGAACAGCCTTT-AGGGCCAACCCG  
TCTCTGTTGCAAAAGAGTGGGAAGATTCT-TTAGTAGAGGTGATAGACCTATCGAACCTA  
GAGATAGCTGGTTATTCAGGAAAAGGATTTAAGTCTACCTTAGGTTTTTT-ATACC-TT  
AAAAATACTTAATT-AACCTTAAGAGCTATTCAGATAAGGTACAGCCTATCTGAAACAGG  
ATACAACCTCAAC-----AAGCAG  
CCACCTTT-AAGAAAGCGTTAAAGCTTCATTA--TCTTAACCAAAAA-TTCCACCA-CC  
CAAATAAACCTTTAGACTTATACTGAATGACTTCATATTATTATGAAGAACTATATGT  
TAGAACTAGTAACAAGAAGT-AGACCTTCTCCAAAAATGTAAGCTTGAGCCATAATGAAC  
CCCTCACTGGCATTAAAGTATAAATTCTACTAGTAGTAACTTC---ACAAGAAAACCC

TAC-----TTAATTA-TACGTCAATCTTACACCAGTACATTCTGGA  
AAGATTAAGAGTGGGAAGGAAGCTCGGCAAATAA-TTAACCCCGCCTGTTTACCAAAAA  
CATCGCCTCTTGACCC--ATAAGAGGTCCAGCCTGCCAGTGACCAA--GTTAAAC  
GGCCGCGGTACCCTAACCGTGCAAAGGTAGCGCAATCACTTGTCTTTAAATGAGGACTA  
GTATGAACGGCATCACGAGGGTTACTGTCTCCCACTCCACTCAGTGAAACTGATCCC  
CCCGTGAAGAAGCGGGGATAAAAATATAAGACGAGAAGACCCCATGGAGCTTTAAACTCA  
GTATCATCTGCTACTAC--ATAACCAAGTAACAAC-GCAA-CAATGAC-AACTGGTTTT  
TGGTTGGGGTGACCGCGGAGTAAACAAAACCTCCACAACGAAAGGAACATAACCTAA  
TCTAAGAGCGACAGCTCTAAGAATCATAT-----AAATTGACTTAA-TTGATCCAATC  
ACTT--GATCAACGAACCAAGTTACCCTGGGGATAACAGCGCAATCCATTTAAAGAGCCC  
ATATCGACAAATGGGTTTACG-ACC-TCGATGTTGGATCAGGGTATCCCAGTG-GCGCAG  
CAGCTA-CTAA-CGGTTC

>M.aurantiventris MN534727

TTACTGTCAGCTAATTCTCAACTTACACATGCAAGTATCCGCACACCCGTGAGAACGCC  
TTTAACTC-TCTAGGTAAAGGAGCCGGTATCAGGCACAG---ACCT-----TCTAGCCC  
ACAACACCTAGCTTTGCCACACCCTCAAGGGAATTCAGCAGTGATTAACATTGTTTATAA  
GCGACAGCTTGACTCAGTTAAAGAACTA--AAAGCCGGCTAATACGGTGCCAGCCGCCGC  
GGCTACACCGCTAGGCTCAAGTTGACGCT-ATCCGGCGTTAAGCGTGTTTAAGTGCTC-  
AAATAGATTAGAATTAACCCCAACCAAGCTGTGACACGCTTGTTACTAAAAAAAAACAAA  
AACGAAAGTTATTCTAACCAGTCCACTTGACCCACGACAGCTAGGACACAACTGGGAT  
TAGGTACCCACTATGCCTAGCTATAAAATATTTATTCACACCT-TAAACCGCCAGGGGA  
TTACGAGCTCAAGCTTAAACCCAAAGGACTTGACGGTGCCCCACCCACCTAGAGGAGCC  
TGTTCTATAA-TCGATTCTCCCC-GATATACCTCACCGCTTCTAGCCTT--TCAGCCTGT  
ATACCTCCGTCGTAAGCTTACCATATGAACGCC-TCTTAGTGAGCTAAATGAT--TTCTC  
ATATACACGTCAGGTCAAGGTGCAGCCACGAAGCGCAAGCAATGGGCTACAATTTCTA  
TTGA--TAGAACACA-CGAAAGACTACATGCAA-CTTAGTCATGAAGCGGATTTAGTAG  
TAAAAGAAAATAGAGAGTTCTTTTTAACCAGGCGCTGGGGCGGTACACACCGCCCGTC  
ACCCTCTTCAAACGCCACA-GTCTAG-TATTTAACAAC-CTAACGCATATTAGAAGAGGT  
AAGTCGTAACACGGTAAGCGTACTGGAAAGTGCGCTTGATTAA-CAAATATAGCTTAA  
CTTAAAGCACCTCGCTTACACCGAAGACATGTCTGTTTAACTCAGATTATTTTGAA-GCC

AAAACTTAGCTCTC---TTCTCCT-TATGAGCCACT--CACAATT--TACTTT-TAAAA  
TAAAACATTTTTTCAT-TTTAGGTAAAGGCGATTAAAAAATATCTA-GAAGCTATAGAAAC  
CAGTACCGCAAGGGAATAGTGAAATAATAATGAAAA---CCTTCAGCACCAAATAGCAGA  
GCTTCTACCTCGTACCTTTTGCATCATGGTCTAACAAGTCTAACCAAGCAAACGCATCT  
AAAGTTTGACACCCCGAAACCAAGCGAGCTACTCAAAAACAGCCTTAT-GGGCGAACCCG  
TCTCTGTTGCAAAAGAGTGGGACGATTTT-TAAGTAGAGGTGATAAACCTACCGAGCTTG  
GAGATAGCTGGTTATTCAGGAAAAGGATATAAGTCTTACCTTAAGTTTATT-GTACT-AA  
T-TAATACGCCTCA-AACTATAGAGTTATTCAAATAAGGTACAGCCTATT-GAAACAGG  
ATACAACCTCAACAAC-----AAGCAG  
CCACCTTTCTAAAAAGCGTTAAAGCTTTACTG---TTTATTCAAAAAATCCCCTTA-AC  
TTTCTTAAACCCTT-TTATTAATACTGAATGACTTCATAATTATATGAAGAACCTTATGT  
TAGAACTAGTAACAAGAAGA-AGCCCTTCTCCT-AAATGTAAGCATGAGCCAAAACGAAC  
AAATCATTGGCATTTAAAATTTGTAAGCCCTTAGTAGTAACCCA---CCAAGAAAAGCC  
TAC-----TAAACAT-CATGTCAACCTTACACTAGCACATTTATGGA  
AAGATTAAAAGAATGGGAAGGAAGCTCGGCAAATAA-CTAACCCCGCCTGTTTACCAAAAA  
CATCGCCTCCTGAATCTC---ATAGGAGGTCTAGCCTGCCAGTGATAAA--ATTAAAC  
GGCCGCGGTACCCTAACCGTGCAAAGGTAGCGCAATCACTTGTTCTTTAAATGAGGACTA  
GTATGAACGGCATCACGAGGGTTACACTGTCTCCCCACTCTATTCAGTGAAACTGATTTT  
CCCGTGAAGAAGCGGGAATAAAAAATATAAGACGAGAAGACCCCATGGAGCTTAAACTCA  
GTATCACTTGCCACTTT--TAAAGCCTTTAAACCAC-GCAA-CCCTGAT-TACTAGTTTT  
CGGTTGGGGTGACCGCGGAGAAAAACAAAACCTCCACGACGAAAGGACCTAACCAACCTAA  
TCCAAGAGCTACACCTCCAAGAATCAAC-----ACATTGACTAAA-TTGATCCATTT  
TTT---GACCAACGAACCAAGTTACCCTGGGGATAACAGCGCAATCCATTTCAAGAGCCC  
CTATCGACAAATGGGTTTACG-ACC-TCGATGTTGGATCAGGGTATCCAAGTG-GCGCAG  
CCGCTA-CTAA-----

>M.aurantiventris MN534728

TTACTGTCAGCTAATTCTCAACTTACACATGCAAGTATCCGCACACCCGTGAGAACGCC  
TTTAACCTC-TCTAGGTAAAGGAGCCGGTATCAGGCACAG---ACCT-----TCTAGCCC  
ACAACACCTAGCTTTGCCACACCCTCAAGGGAATTCAGCAGTGATTAACATTGTTTCATAA  
GCGACAGCTTGACTCAGTTAGAGAATA--AGAGCCGGCTAATACGGTGCCAGCCGCCGC

GGCTACACCGCTAGGCTCAAGTTGACGCT-ATCCGGCGTTAAGCGTGTTTTAAGTGCTC-  
AAATAGATTAGAATTAACCCCAACCAAGCTGTGACACGCTTGTTACTAAGAAAAACAAA  
AACGAAAGTTATTCTAACCAGTCCACTTGACCCACGACAGCTAGGACACAACTGGGAT  
TAGGTACCCCACTATGCCTAGCTATAAAATATTTATTACACCT-TAAACCGCCAGGGGA  
TTACGAGCTCAAGCTTAAACCCAAAGGACTTGACGGTGCCCCACCCACCTAGAGGAGCC  
TGTTCTATAA-TCGATTCTCCCC-GATATACCTCACCGCTTCTAGCCTT--TCAGCCTGT  
ATACCTCCGTCGTAAGCTTACCATATGAACGCC-TCTTAGTGAGCTAAATGAT--TTCTC  
ATATACACGTCAGGTCAAGGTGCAGCCCACGAAGCGGCAAGCAATGGGCTACAATTTCTA  
TTGA--TAGAACACA-CGAAAGACTACATGCAA-CTTAGTCATGAAGGCGGATTTAGTAG  
TAAAAAGAAAATAGAGAGTTCTTTTTAACCAGGCGCTGGGGCGGTACACACCGCCCGTC  
ACCCTCTTCAAACGCCACA-GTCTAG-TATTTAACAAC-CTAACGCATATTAGAAGAGGT  
AAGTCGTAACACGGTAAGCGTACTGGAAAGTGCCTTGGATTAA-CAAAATATAGCTTAA  
CTTAAAGCACCTCGCTTACACCGAAGACATGTCTGTTTAACTCAGATTATTTTGA--GCC  
AAAACTTAGCTCTC--TTCTCCT-TATGAGCCACT--CACAAATT--TACTTT-TAAAA  
TAAACATTTTTTCAT-TTTAGGTAAAGGCGATTAAAAAATATCTA-GAAGCTATAGAAAC  
CAGTACCGCAAGGGAATAGTGAAATAATAATGAAAA--CCTTCAGCACCAAATAGCAGA  
GCTTCTACCTCGTACCTTTTGCATCATGGTCTAACAAGTCTAACCAAGCAAACGCATCT  
AAAGTTTGACACCCCGAAACCAAGCGAGCTACTCAAAAAACAGCCTTAT-GGGCGAACCCG  
TCTCTGTTGCAAAAGAGTGGGACGATTTT-TAAGTAGAGGTGATAAACCTACCGAGCTTG  
GAGATAGCTGGTTATTCAGGAAAAGGATATAAGTCTACCTTAAGTTTATT-GTACT-AA  
T-TAATACGCCTCA-AACTATAGAGTTATTCAAATAAGGTACAGCCTATT-GAAACAGG  
ATACAACCTCAACAAC-----AAGCAG  
CCACCTTTCTAAAAAGCGTTAAAGCTTTACTG----TTTATTCAAAAAATCCCCTTA-AC  
TTTCTTAAACCCTT-TTATTAATACTGAATGACTTCATAATTATATGAAGAACCTTATGT  
TAGAACTAGTAACAAGAAGA-AGCCCTTCTCCT-AAATGTAAGCATGAGCCAAAACGAAC  
AAATCATTGGCATTAAAATTTGTAAGCCCTTAGTAGTAACCA----CCAAGAAAAGCC  
TAC-----TAAACAT-CATGTCAACCTTACACTAGCACATTTATGGA  
AAGATTAAAAGAATGGGAAGGAACCTCGGCAAATAA-CTAACCCCGCCTGTTTACCAAAAA  
CATCGCCTCCTGAATCTC----ATAGGAGGTCTAGCCTGCCAGTGATAAA--ATTAAAC  
GGCCGCGGTACCCTAACCGTGCAAAGGTAGCGCAATCACTTGTTCTTTAAATGAGGACTA

GTATGAACGGCATCACGAGGGTTACACTGTCTCCCCACTCTATTCAGTGAAACTGATTTT  
CCCGTGAAGAAGCGGGAATAAAAATATAAGACGAGAAGACCCCATGGAGCTTAAACTCA  
GTATCACTTGCCACTTT--TAAAGCCTTTAAACCAC-GCAA-CCCTGAT-TACTAGTTTT  
CGGTTGGGGTGACCGCGGAGAAAAACAAAACCTCCACGACGAAAGGACCTAACCAACCTAA  
TCCAAGAGCTACACCTCCAAGAATCAAC-----ACATTGACTAAA-TTGATCCATTT  
TTT---GACCAACGAACCAAGTTACCCTGGGGATAACAGCGCAATCCATTTCAAGAGCCC  
CTATCGACAAATGGGTTTACG-ACC-TCGATGTTGGATCAGGGTATCCAAGTG-GCGCAG  
CCGCTA-CTAA-----

>M. butleri MN534729, MN534516, MN534620

TTATTATCAGCTACCTCTCGACTTACACATGCAAGTATCAGCACACCCGTGAGAACGCC  
TTCAACCTC-ACCAGGACAAGGAGCTGGTATCAGGCGCAG---ATTT-----TCTAGCCC  
ATTACACCTAGCTTTGCCACACCCTCAAGGGAATTCAGCAGTGATTAACATTGTTAATAA  
GCGTCAGCTTGACTCAGTCAGAGAACCA--AGAGCCGGCTAATACGGTGCCAGCCGCCGC  
GGCTACACCGCTAGGCTCAAGTTGATATT-ACTCGGCGTTAAGCGTGTTTAAAGTGCCT-  
TTAA-GATTAGGGTTAAACCACAACCAAGCTGTGACACGCTTGTTTAAA-GAAACACAAA  
AACGAAAGTTACTCTAACCAAAACCACTTGACCCACGACAGCTAGGGCACAACTGGGAT  
TAGGTACCCACTATGCCTAGCCGTAAAATATTTACCTACACCT-TTAACCGCCCGGGAA  
TTACGAGCCCAAGCTTAAAACCAAGGACTTGACGGTGCCCCACCCACCTAGAGGAGCC  
TGTTCTATAA-TCGATTCTCCCC-GATATACCTCACCCTTCTAGCATA--TCAGCCTGT  
ATACCTCCGTGTAAGCTTACCATATGAACGTC-TACTAGTGAGCCAAATGAT--TTTCA  
ATAAATACGTCAGGTCAAGGTGCAGCCACGAAGTGGTAAGCAATGGGCTACAATTTCTA  
CTAA--TAGAACACAACGAAAGACTATGTGCAA-TCTAGTCATGAAGGCGGATTTAGCAG  
TAAAAGAAAAATAGAGAGTTCTTTTTAACCTGGCGCTGGGACGCGTACACACCGCCCGTC  
ACCCTCTTCAAACGCTTCT-GCAAAG-TTAATAACAAA-ATTATGCACACCAGAAGAGGT  
AAGTCGTAACACGGTAAGCGTACTGGAAAGTGCGCTTGATTAA-CAAATGTAGCTTAA  
CTAAA-GCATCTTGCTTACACCAAGAACATGTCCGTTTAACTCAGATCATTTTGA--GCC  
AAAAACTTAGCTCTC---TACCCCT-AATGAAATTTT--TTCAACT--AACAA--CCTTA  
TAAAACATTTTACAC-TTCAAGTAAAGGCGATTGAAAAATGTCTA-GAAGCTATAGAAAC  
TAGTACCGCAAGGGAAAAGTGAAATAACAGTGAAAA---TTTTAAGCACAAAACAGCAGA  
GCCTCAACCTCGTACCTTTTGCATCATGGTTTAAACAAGTCTAACCAAGCAAA-CGCACCT



TAAGTTTGACTTCCCGAAACTAGACGAGCTACTTAAGAACAGCCTTGT-GGGCCAACCCG  
TCTCTGTTGCAAAAGAGTGGGACGATTTTTTTAAGTAGAGGTGATAAACCTACCGAGCCTA  
GAGATAGCTGGTTATTCAGGAAAAGGATCTAAGTCCTACCTTAAATTTTAT-GTA-----  
-----  
-----AAGCAG  
CCACCTTTT-AAAAAGCGTTAAAGCTTTATTG---TTTACCAAAAAATACCATAA-AC  
CTAACTCAACCCTT-TACTA-ATACTGAATGACTTCATACCTTTATGAAGAACCTTATGT  
TAGAACTAGTAACAAGAAGA-AGCCCTTCTCCA-AAATGTAAACATGAACCAAAATGAAC  
AAATCATTGGTATTTAAAATTTTTTTAGCTACAAGTAACAACCTCA----TCAAGAAAACCT  
TAC-----TGCCCAA-CATGTCAACCTTACACAAGTACATTTATGGA  
AAGAGTAAAAGAATGGGAAGGAACCTCGGCAAATAA-CTAACCCCGCCTGTTTACCAAAAA  
CATCGCCTCCTGCTACTTT--ATAGGAGGTCCAGCCTGCCAGTGATAAA--ATTAAAC  
GGCCGCGGTACCCTAACCGTGCAAAGGTAGCGCAATCACTTGTTCTTTAAATGAGGACTA  
GTATGAACGGCATCACGAGGGTTACACTGTCTCCCCACTCCACTCAGTGAAACTGATCCC  
CCCGTGAAGAAGCGGGATAAATATATAAGACGAGAAGACCCCATGGAGCTTAAAACCTCA  
GTCTTACCTGCCATCTA--AAAAACCTAGAAACCAC-GCAG-TACTAAT-GACTAGTTTT  
CGGTTGGGGTGACCGCGGAGAAAAACAAATCCTCCACGACGAAAGGACCTATCCACCTAA  
CCCAAGAGTTACACCTCTAAGAATCAAC-----ACATTGACCAA--CTGATCCAATT  
TTTT--GATCAGCGGACCAAGTTACCCTGGGGATAACAGCGCAATCCATTTCAAGAGCTC  
ATATCGACAAAATGGGTTTACG-ACC-TCGATGTTGGATCAGGGTATCCAAGTG-GCGCAG  
CCGCTA-CTAA-CGGTTC

>M. butleri MN534730, MN534517, MN534621

TTATTATCAGCTACCTCTCGACTTACACATGCAAGTATCAGCACACCCGTGAGAACGCC  
TTCAACCTC-ACCAGGACAAGGAGCTGGTATCAGGCGCAG---ATTT-----TCTAGCCC  
ATTACACCTAGCTTTGCCACACCCTCAAGGGAATTCAGCAGTGATTAACATTGTTAATAA  
GCGTCAGCTTGACTCAGTCAGAGAACCA--AGAGCCGGCTAATACGGTGCCAGCCGCCGC  
GGCTACACCGCTAGGCTCAAGTTGATATT-ACTCGGCGTTAAGCGTGTTTAAAGTGCCT-  
TTAA-GATTAGGGTTAAACCACAACCAAGCTGTGACACGCTTGTTTAAA-GAAACACAAA  
AACGAAAGTTACTCTAACCAACCCTTGACCCACGACAGCTAGGGCACAAACTGGGAT  
TAGGTACCCACTATGCCTAGCCGTAAAATATTTACCCACACCT-TTAACCGCCCGGAA

TTACGAGCCCAAGCTTAAAACCCAAAGGACTTGACGGTGCCCCACCCACCTAGAGGAGCC  
TGTTCTATAA-TCGATTCTCCCC-GATATACCTCACCCTTCTAGCATA--TCAGCCTGT  
ATACCTCCGTCGTAAGCTTACCATATGAACGTC-TACTAGTGAGCCAAATGAT--TTTCA  
ATAAATACGTCAGGTCAAGGTGCAGCCCACGAAGTGGTAAGCAATGGGCTACAATTTCTA  
CTAA--TAGAACACAACGAAAGACTATGTGCAA-TCTAGTCATGAAGCGGATTTAGCAG  
TAAAAGAAAATAGAGAGTTCTTTTTAACCTGGCGCTGGGACGCGTACACACCGCCCGTC  
ACCCTCTTCAAACGCTTCT-GCAAAG-TTAATAACAAA-ATTATGCACACCAGAAGAGGT  
AAGTCGTAACACGGTAAGCGTACTGGAAAGTGCCTTGGATTAA-CAAATGTAGCTTAA  
CTAAA-GCATCTTGCTTACACCAAGAACATGTCCGTTTAACTCAGATCATTTTTGA--GCC  
AAAACTTAGCTCTC---TACCTCT-AATGAAATTTT-TTCAACT--AACAA--CTCTA  
TAAAACATTTTACAC-TTCAAGTAAAGGCGATTGAAAAATGTCTA-GAAGCTATAGAAAC  
TAGTACCGCAAGGAAAAGTGAATAACAGTGAAAA---TTTTAAGCACAAAACAGCAGA  
GCCTCAACCTCGTACCTTTTGCATCATGGTTTAAACAAGTCTAACCAAGCAAAACGCACCT  
TAAGTTTGACTTCCCGAACTAGACGAGCTACTTAAGAACAGCCTTGTGGGGCCAACCCG  
TCTCTGTTGCAAAAGAGTGGGACGATTTTTTAAAGTAGAGGTGATAAACCTACCGAGCCTA  
GAGATAGCTGGTTATTTCAGGAAAAGGATCTAAGTCCTACCTTAAATTTTA-----  
-----  
-----AAGCAG  
CCACCTTTT-AAAAGCGTTAAAGCTTTTATTGT---CATACCAAAAAATACCATAA-AC  
CTAACTCAACCCTT-TACTA-ATACTGAATGACTTCATACCTTTATGAAGAACCTTATGT  
TAGAACTAGTAACAAGAAGA-AGCCCTTCTCCA-AAATGTAAACATGAACCAAAATGAAC  
AAATCATTGGTATTTAAAATTTTTTAGCTACAAGTAACAACCTCA----TCAAGAAAACCT  
TAC-----TGCCCAA-CATGTCAACCTTACACAAGTACATTTTATGGA  
AAGAGTAAAAGAATGGGAAGGAACCTCGGCAAATAA-CTAACCCCGCCTGTTTACCAAAAA  
CATCGCCTCCTGCTACTTT---ATAGGAGGTCCAGCCTGCCAGTGATAAA--ATTAAAC  
GGCCGCGGTACCCTAACCGTGCAAAGGTAGCGCAATCACTTGTTCCTTAAATGAGGACTA  
GTATGAACGGCATCACGAGGGTTACACTGTCTCCCACTCTACTCAGTGAAACTGATCCC  
CCCGTGAAGAAGCGGGGATAAATATATAAGACGAGAAGACCCCATGGAGCTTAAACTCA  
GTCTTACCTGCCATCTA--AAAACCTAGAAACCAC-GCAG-TACTAAT-GACTAGTTTT  
CGGTTGGGGTGACCGCGGAGAAAAACAAATCCTCCACGACGAAAGGACCTATCCACCTAA

CCCAAGAGGTACACCTCTAAGAATCAAC-----ACATTGACCAA--CTGATCCAATT  
TTTT--GATCAACGGACCAAGTTACCCTGGGGATAACAGCGCAATCCATTTCAAGAGCTC  
ATATCGACAAATGGGTTTACG-ACC-TCGATGTTGGATCAGGGTATCCAAGTG-GCGCAG  
CCGCTA-CTAA-CGGTTC

>M. butleri MN534731, MN534518, MN534622

TTATTATCAGCTACCTCTCGACTTACACATGCAAGTATCAGCACACCCGTGAGAACGCC  
TTCAACCTC-ACCAGGACAAGGAGCTGGTATCAGGCGCAG---ATTT-----TCTAGCCC  
ATTACACCTAGCTTTGCCACACCCTCAAGGGAATTCAGCAGTGATTAACATTGTTAATAA  
GCGTCAGCTTGACTCAGTCAGAGAACCA--AGAGCCGGCTAATACGGTGCCAGCCGCCGC  
GGCTACACCGCTAGGCTCAAGTTGATATT-ACTCGGCGTTAAGCGTGTTTAAAGTGCCT-  
TTAA-GATTAGGGTTAAACCACAACCAAGCTGTGACACGCTTGTTTAAA-GAAACACAAA  
AACGAAAGTTACTCTAACCAACCACTTGACCCACGACAGCTAGGGCACAACCTGGGAT  
TAGGTACCCACTATGCCTAGCCGTAAAATATTTACCTACACCT-TTAACCGCCCGGGAA  
TTACGAGCCCAAGCTTAAACCCAAAGGACTTGACGGTGCCCCACCCACCTAGAGGAGCC  
TGTTCTATAA-TCGATTCTCCCC-GATATACCTCACCCTTCTAGCATA--TCAGCCTGT  
ATACCTCCGTGTAAGCTTACCATATGAACGTC-TACTAGTGAGCCAAATGAT--TTTCA  
ATAAATACGTCAGGTCAAGGTGCAGCCACGAAGTGGTAAGCAATGGGCTACAATTTCTA  
CTAA--TAGAACACAACGAAAGACTATGTGCAA-TCTAGTCATGAAGGCGGATTTAGCAG  
TAAAAGAAAAATAGAGAGTTCTTTTTAACCTGGCGCTGGGACGCGTACACACCGCCCGTC  
ACCCTCTTCAAACGCTTCT-GCAAAG-TTAATAACAAA-ATTATGCACACCAGAAGAGGT  
AAGTCGTAACACGGTAAGCGTACTGGAAAGTGCGCTTGGATTAA-CAAATGTAGCTTAA  
CTAAA-GCATCTTGCTTACACCAAGAACATGTCCGTTTAACTCAGATCATTTTGA--GCC  
AAAAACTTAGCTCTC---TACCCCT-AATGAAATTTT--TTCAACT--AACAA--CCTTA  
TAAAACATTTTACAC-TTCAAGTAAAGGCGATTGAAAAATGTCTA-GAAGCTATAGAAAC  
TAGTACCGCAAGGGAAAAGTGAAATAACAGTGAAAA---TTTTAAGCACAAAACAGCAGA  
GCCTCAACCTCGTACCTTTTGCATCATGGTTTAAACAAGTCTAACCAAGCAAACGCACCT  
TAAGTTTGACTTCCCGAAACTAGACGAGCTACTTAAGAACAGCCTTGT-GGGCCAACCCG  
TCTCTGTTGCAAAAGAGTGGGACGATTTTTTAAAGTAGAGGTGATAAACCTACCGAGCCTA  
GAGATAGCTGGTTATTCAGGAAAAGGATCTAAGTCTACCTTAAATTTTA-----  
-----

-----  
-----CCAAAAAATACCATAA-AC  
CTAACTCAACCCTT-TACTA-ATACTGAATGACTTCATACCTTTATGAAGAACCCTTATGT  
TAGAACTAGTAACAAGAAGA-AGCCCTTCTCCA-AAATGTAAACATGAACCAAATGAAC  
AAATCATTGGTATTTAAAATTTTTTAGCTACAAGTAACAACCTCA----TCAAGAAAACCT  
TAC-----TGCCCAA-CATGTCAACCTTACACAAGTACATTTATGGA  
AAGAGTAAAAGAATGGGAAGGAACCTCGGCAAATAA-CTAACCCCGCCTGTTTACCAAAAA  
CATCGCCTCCTGCTACTTT---ATAGGAGGTCCAGCCTGCCAGTGATAAA--ATTAAAC  
GGCCGCGGTACCCTAACCGTGCAAAGGTAGCGCAATCACTTGTTCCTTTAAATGAGGACTA  
GTATGAACGGCATCACGAGGGTTACACTGTCTCCCCACTCCACTCAGTGAAACTGATCCC  
CCCGTGAAGAAGCGGGATAAATATATAAGACGAGAAGACCCCATGGAGCTTAAAACCTCA  
GTCTTACCTGCCATCTA--AAAAACCTAGAAACCAC-GCAG-TACTAAT-GACTAGTTTT  
CGGTTGGGGTGACCGCGGAGAAAAACAAATCCTCCACGACGAAAGGACCTATCCACCTAA  
CCCAAGAGTTACACCTCTAAGAATCAAC-----ACATTGACCAA--CTGATCCAATT  
TTT---GATCAGCGGACCAAGTTACCCTGGGGATAACAGCGCAATCCATTTCAAGAGCTC  
ATATCGACAAATGGGTTTACG-ACC-TCGATGTTGGATCAGGGTATCCAAGTG-GCGCAG  
CCGCTA-CTAA-CGGTTC

>M. butleri MN534732, MN534519, MN534623

TTATTATCAGCTATCTCCCGACTTACACATGCAAGTATCAGCACACCCGTGAGAACGCC  
TTCAACCTC-ACCAGGACAAGGAGCCGGTATCAGGCACAG---ACTT-----TCTAGCCC  
ATGACACCTAGCTTTGCCACACCCTCAAGGGAATTCAGCAGTGATTAACATTTGTTTATAA  
GCGTCAGCTTGACTCAGTCAGAGAACTA--AGAGCCGGCTAATACGGTGCCAGCCGCCGC  
GGCTACACCGCTAGGCTCAAGTTGATATT-ACTCGGCGTTAAGCGTGTTTAAAGTGCCC-  
TTAA-GATTAGAGTTAAACCACAACCAAGCTGTGACACGCTTGTTTAAA-GAAACACAAA  
AACGAAAGTTACTCTAACCAAACCACTTGACCCACGACAGCTAGGGCACAACCTGGGAT  
TAGGTACCCCACTATGCCTAGCCGTAAAATATTTACCTACACCT-TTAACCGCCCGGGAA  
TTACGAGCCCAAGCTTAAAACCAAAGGACTTGACGGTGCCCCACCCACCTAGAGGAGCC  
TGTTCTATAA-TCGATTCTCCCC-GATATACCTCACCCTTCTAGCCCA--TCAGCCTGT  
ATACCTCCGTCGTAAGCTTACCATATGAACGTC-TACCAGTGAGCCAAATGAT--TTTCA  
ATAAATACGTCAGGTCAAGGTGCAGCCCACGAAGTGGTAAGCAATGGGCTACAATTTCTA

TCAA--TAGAACACAACGAAAGACTATGTGAAA--CCTAGTCATGAAGGCGGATTTAGTAG  
TAAAAGAAAATAGAGAGTTCTTTTTAACCTGGCGCTGGGACGCGTACACACCGCCCGTC  
ACCCTCTTCAAACGCTTCT-GCAAAG-TTAATAACAAA-ATTATGCACACCAGAAGAGGT  
AAGTCGTAACACGGTAAGCGTACTGGAAAGTGCCTTGGATTAA-CAAATGTAGCTTAA  
CTAAA-GCATCTTGCTTACACCAAGAACATGTCCGTTTAACTCAGATCATTTTTGA--GCC  
AAAACTTAGCTCTC---TTCCTCA-AATGAAATTTT-TTTAACT--AACAA--CTTTA  
TAAAACATTTTACAC-TTCAAGTAAAGGCGATTGAAAAATGTCTA-GAAGCTATAGAAAC  
CAGTACCGCAAGGAAAAGTGAATAATAATGAAAA---TTTTAAGCACAAAACAGCAGA  
GCCTAAACCTCGTACCTTTTGCATCATGGTTTAAACGAGTCTAACCAAGCAAAACGCACCT  
TAAGTTTGACTTCCCGAAACTAGACGAGCTACTTAAGAACAGCCTTAT-GGGCCAACCCG  
TCTCTGTTGCAAAAGAGTGGGACGATTTT-TAAGTAGAGGTGACAAACCTACCGAGTTTA  
GAGATAGCTGGTTATTCAGGAAAAGGATCTAAGTCCTACCTTAAATTTTCT-GTATC-TT  
C-TAATACAC-----  
-----AAGCAG  
CCACCTTTT-AAAAGCGTTAAAGCTTTATGTC---TTGCCAAAAAATACCACAA-AC  
TTAACTTAACCCTT-TAATA-ATACTGAATGACTTCATATTTTTTATGAAGAACCTTATGT  
TAGAACTAGTAACAAGAAGA-AGCCCTTCTCCA-AAATGTAGGCATGAACCAAATGAAC  
AAATCATTGGTACTTAAAATTTTTTAACTACAAGTAACAACCTCA----TCAAGAAAACCT  
TAC-----TACCCAA-CATGTCAACCTTACACAAGTACATTTTATGGA  
AAGAGTAAAAGAATGGGAAGGAACTCGGCAAATAA-CTAACCCCGCCTGTTTACCAAAAA  
CATCGCCTCCTGCTACTTT---ATAGGAGGTCCAGCCTGCCAGTGATAAA--ATTAAAC  
GGCCGCGGTACCCTAACCGTGCAAAGGTAGCGCAATCACTTGTCTTTAAATGAGGACTA  
GTATGAACGGCATCACGAGGGTTACACTGTCTCCCACTCTACTCAGTGAAACTGATCCC  
CCCGTGAAGAAGCGGGGATAAAAATATAAGACGAGAAGACCCCATGGAGCTTAAAACCTCA  
GTCTTACCTGCCACCTA-AATAAACCTAGAAACCAC-GCAG-TACTAAT-GACTAGTTTT  
CGGTTGGGGTGACCGCGGAGAAAAACAAATCCTCCACGACGAAGGGACCTACTCACCTAA  
TCCAAGAGTTACACCTCTAAGAATCAAC-----ACATTGACCAA--CTGATCCAATT  
TTTT--GATCAACGGACCAAGTTACCCTGGGGATAACAGCGCAATCCATTTCAAGAGCTC  
ATATCGACAAATGGGTTTACG-ACC-TCGATGTTGGATCAGGGTATCCAAGTG-GCGCAG  
CCGCTA-CTAA-CGGTTC

>M. butleri MN534733, MN534520, MN534624

TTATTATCAGCTACCTCCCGACTTACACATGCAAGTATCAGCACACCCCGTGAGAACGCC  
TTCAACCTC-ACCAGGACAAGGAGCCGGTATCAGGCACAG---ACTT-----TCTAGCCC  
ATGACACCTAGCTTTGCCACACCCTCAAGGGAATTCAGCAGTGATTAACATTGTTTATAA  
GCGTCAGCTTGACTCAGTCAGAGAACTA--AGAGCCGGCTAATACGGTGCCAGCCGCCGC  
GGCTACACCGCTAGGCTCAAGTTGATATT-CTCGGCGTTAAGCGTGTTTAAAGTGCCT-  
TTAA-GATTAGAGTTAAACCACAACCAAGCTGTGACACGCTTGTTTAAA-GAAACACAAA  
AACGAAAGTTACTCTAACCAAACCACTTGACCCACGACAGCTAGGGCACAACTGGGAT  
TAGGTACCCCACTATGCCTAGCCGTAAAATATTTACCTACACCT-TTAACCGCCCGGAA  
TTACGAGCCCAAGCTTAAAACCAAAGGACTTGACGGTGCCCCACCCACCTAGAGGAGCC  
TGTTCTATAA-TCGATTCTCCCC-GATATACCTCACCCTTCTAGCCCA--TCAGCCTGT  
ATACCTCCGTCGTAAGCTTACCATATGAACGTC-TACCAGTGAGCCAAATGAT--TTTCA  
ATAAATACGTCAGGTCAAGGTGCAGCCACGAAGTGGTAAGCAATGGGCTACAATTTCTA  
TCAA--TAGAACACAACGAAAGACTATGTGAAA-CCTAGTCATGAAGGCGGATTTAGTAG  
TAAAAGAAAATAGAGAGTTCTTTTTAACCTGGCGCTGGGACGCGTACACACCGCCCGTC  
ACCCTCTTCAAACGCTTCT-GCAAAG-TTAATAACAAA-ATTATGCACACCAGAAGAGGT  
AAGTCGTAACACGGTAAGCGTACTGGAAAGTGCCTTGGATTAA-CAAAATGTAGCTTAA  
CTAAA-GCATCTTGCTTACACCAAGAACATGTCCGTTTAACTCAGATCATTTTGA--GCC  
AAAACTTAGCTCTC---TTCCTCA-AATGAAATTTT-TTTAACT--AACAA--CTTTA  
TAAAACATTTTACAC-TTCAAGTAAAGGCGATTGAAAAATGTCTA-GAAGCTATAGAAAC  
CAGTACCGCAAGGGAAAAGTGAATAATAATGAAAA---CTTTAAGCACAAAACAGCAGA  
GCCTAAACCTCGTACCTTTTGCATCATGGTTTAAACAAGTCTAACCAAGCAAAACGCACCT  
TAAGTTTGACTTCCCGAAACTAGACGAGCTACTTAAGAACAGCCTTAT-GGGCCAACCCG  
TCTCTGTTGCAAAAGAGTGGGACGATTTTTTAAAGTAGAGGTGATAAACCTACCGAGTTTA  
GAGATAGCTGGTTATTCAGGAAAAGGATCTAAGTCTACCTTAAATTTT-----  
-----  
-----AAGCAG  
CCACCTTTT-AAAAAGCGTTAAAGCTTTATTTGT----TTACCAAAAAATACCACAA-AC  
TTAACTTAACCCTC-TACTA-ATACTGAATGACTTCATATCTTTATGAAGAACCTTATGT  
TAGAACTAGTAACAAGAAGA-AGCCCTTCTCCA-AAATGTAAGCATGAACCAAAATGAAC

AAATCATTGGTGCTTAAAATTTTTTAACTACAAGTAACAACCTCA----TCAAGAAAATCT  
TAC-----TACCCAA-CATGTCAACCTTACACAAGTACATTTATGGA  
AAGAGTAAAAGAATGGGAAGGAACCTCGGCAAATAA-CTAACCCCGCCTGTTTACCAAAAA  
CATCGCCTCCTGCTACTTT---ATAGGAGGTCCAGCCTGCCAGTGATAAA--ATTAAAC  
GGCCGCGGTACCCTAACCGTGCAAAGGTAGCGCAATCACTTGTTCCTTTAAATGAGGACTA  
GTATGAACGGCATCACGAGGGTTACACTGTCTCCCCGCTCTACTCAGTGAAACTGATCTC  
CCCGTGAAGAAGCGGGGATAAAAATATAAGACGAGAAGACCCCATGGAGCTTAAAACCTCA  
GTCTTACCTGCCACCTA--AAAAACCTAGAAACCAC-GCAG-TACTAAT-GACTAGTTTT  
CGGTTGGGGTGACCGCGGAGAAAAACAAATCCTCCACGACGAAGGGACCTCCTCACCTAA  
TCCAAGAGTTACACCTCTAAGAATCAAC-----ACATTGACCAA--CTGATCCAATT  
TTTT--GATCAACGGACCAAGTTACCCTGGGGATAACAGCGCAATCCATTTCAAGAGCTC  
ATATCGACAAATGGGTTTACG-ACC-TCGATGTTGGATCAGGGTATCCAAGTG-GCGCAG  
CCGCTA-CTAA-CGGTTC

>M. butleri MN534734, MN534521, MN534625

TTATTATCAACTACCTCTCGACTTACACATGCAAGTATCAGCACACCCGTGAGAACGCC  
TTCAACCTC-ACCAGGACAAGGAGCTGGTATCAGGCACAG---ATTT-----TCTAGCCC  
ATAACACCTAGCTTTGCCACACCCTCAAGGGAATTCAGCAGTGATTAACATTGTTTATAA  
GCGTAAGCTTGACTCAGTCAGAGAACTA--AGAGCCGGCTAATACGGTGCCAGCCGCCG  
GGCTACACCGCTAGGCTCAAGTTGATACT-ACTCGGCGTTAAGCGTGTTTAAAGTGCCT-  
CTAA-GATTAGAGTTAAACCACAACCAAGCTGTGACACGCTTGTTTAAA-GAAGCACAAA  
AACGAAAGTTACTCTAACCAAACCACTTGACCCACGACAGCTAGGGTACAAACTGGGAT  
TAGGTACCCCACTATGCCTAGCCGTAAAATATTTACCTACACCT-TTAACCGCCCGGGAA  
TTACGAGCCCAAGCTTAAAACCAAAGGACTTGACGGTGCCCCACCCACCTAGAGGAGCC  
TGTTCTATAA-TCGATTCTCCCC-GATATACCTCACCACTTCTAGCINN--TCAGCCTGT  
ATACCTCCGTCGTAAGCTTACCCTATGAACGTC-TACCAGTGAGCCAAATGAT--TTTCA  
ATAAATACGTCAGGTCAAGGTGCAGCCACGAAGTGCAAGAAATGGGCTACAATTTCTA  
CTAA--TAGAACATAACGAAAGACTACGTGCAA-TCTAGTCATGAAGCGGATTTAGCAG  
TAAAAGAAAATAGAGAGTTCTTTTTAACTTGGCGCTGGGACGCGTACACACCGCCCGTC  
ACCCTCTTCAAACGCTTCT-GCAAAG-TTAATAACAAA-ATTATGCACACCAGAAGAGGT  
AAGTCGTAACACGGTAAGCGTACTGGAAAGTGCCTTGGATTAA-CAAATGTAGCTTAA

TTAAA-GCATCTTGCTTACACCAAGAACATGTCCGTTTAACTCAGATCATTTTTGA--GCC  
AAAACTTAGCTCTA---TACCCCC-AATGAAAATTT--TCTAACT--AACAA--CCCCA  
TAAAACATTTTACAC-TTCAAGTAGAGGCGATTGAAAAATGTCTA-GAAGCTATAGAAAC  
CAGTACCGCAAGGGAAAAGTCAAATAACAGTGAAAA---CTTAAAGCACAAAACAGCAGA  
GACTTAACCTCGTACCTTTTGCATCATGGTTTAAACGAGTCTAACCAAGCAAACGCACCT  
TAAGTTTGACTTCCCGAAACTAGACGAGCTACTTAAGAACAGCCTTAT-GGGCCAACCCG  
TCTCTGTTGCAAAGAGTGGGACGATTTT-TAAGTAGAGGTGATAAACCTACCGAGTCTA  
GAGATAGCTGGTTATTTCAGGAAAAGGATCTAAGTCTTACCTTAAATTTTTT-GTATT-CT  
C-TAATACACCCTA-AAATTTACA--CTATTCAAATAAGGTACAGCCTATT-GAGAAAGG  
ATACAACCTCAAAT-----AAAGCAG  
CCACCTTTTTTAAAAGCGTTAAAGCTTTATGT---TTATCAAAAAATATCATAA-AC  
TTAACTTAACCTT-CACTA-ATACTGAATGACTTCATATCTTTATGAAGAACCTTATGT  
TAGAACTAGTAACAAGAAGA-AGCCCTTCTCCA-AAATATAAGCATGAACCAAATGAAC  
AAATCATTGGTACTTAAAATTTTTTAACTTCAAGTAACAACCCA---TCAAGAAAACCT  
TAC-----TACCTAA-CATGTCAACCTTACACAAGTATATTTATGGA  
AAGAGTAAAAGAATGGGAAGGAAGTTCGGCAAATTA-CTAACCCCGCCTGTTTACCAAAAA  
CATCGCCTCCTGCTACTTT---ATAGGAGGTCCAGCCTGCCAGTGATAAA--ATTAAAC  
GGCCGCGGTACCCTAACCGTGCAAAGGTAGCGCAATCACTTGTTCTTTAAATGAGGACTA  
GTATGAACGGCATCACGAGGGTTACACTGTCTCCCCACTCTACTCAGTGAAACTGATCTC  
CCCGTGAAGAAGCGGGGATAAAAATATAAGACGAGAAGACCCCATGGAGCTTAAAACCTCA  
GTCTTACCTGCCACCTA--AAAACCTAGAAACCAC-GCAG-TACTAAT-GACTAGTTTT  
CGGTTGGGGTGACCGCGGAGAAAAACAAATCCTCCACGACGAAAGGACCTATTTACCTAA  
TCCAAGAGCTACACCTCTAAGAATCAAC-----ACATTGACCAA--CTGATCCAATT  
TTT---GATCAGCGGACCAAGTTACCCTGGGGATAACAGCGCAATCCATTTCAAGAGCTC  
ATATCGACAAATGGGTTTACG-ACC-TCGATGTTGGATCAGGGTATCCAAGTG-GCGCAG  
CCGCTA-CTAA-CGGTTC

>M. butleri MN534735, MN534626

TTATTATCAGCTACCTCTCGACTTACACATGCAAGTATCAGCACACCCGTGAAAACGCC  
TTCAACCTC-CCCAGGACAAGGAGCCGGTATCAGGCACAG---ATTT-----TCTAGCCC  
ATAACACCTAGCTTTGCCACACCCTCAAGGGAATTCAGCAGTGATTAACATTGTTAATAA





GGCCGCGGTACCCTAACCGTGCAAAGGTAGCGCAATCACTTGTCTTTAAATGAGGACTA  
GTATGAACGGCATCACGAGGGTTACACTGTCTCCCCACTCTACTCAGTGAAACTGATCTC  
CCCGTGAAGAAGCGGGGATAAAAATATAAGACGAGAAGACCCCATGGAGCTTAAACTCA  
GTCTTACCTGCCACCTA--AAAAACCTAGAAACCAC-GCAA-TACTAAT-GACTAGTTTT  
CGGTTGGGGTGACCGCGGAGAAAAACAAATCCTCCACGACGAAAGGACCTATT-ACCTAA  
TCTAAGAGCCACTCCTCTAAGAATCAAC-----ACATTGACTAA--CTGATCCAATT  
TTTT--GATCAACGAACCAAGTTACCCTGGGGATAACAGCGCAATCCATTTCAAGAGCTC  
ATATCGACAAATGGGTTTACG-ACC-TCGATGTTGGATCAGGGTATCCAAGTG-GCGCAG  
CCGCTA-CTAA-CGGTTC

>M. zeylanica MN534736, MN534522, MN534627

TTATTATCAACTCGATCTCAACTTACACATGCAAGTATCAGCACACCCGTGAGAACGCC  
TTC-ACCTT-AATAGGACAAGGAGCTGGTATCAGGCACAGGTCCTTACAACCCCTAGCCC  
ATAACACCTAGCTTTGCCACACCCTCAAGGGTACTCAGCAGTGATCAATATTGTATATAA  
GCGCCAGCTTGACTCAGTAAGAGAATTT--AGAGCCGGCCAATACGGTGCCAGCCGCCGC  
GGCTACACCGCTAGGCTCAAGTTGATAAT-ACTCGGCGTTAAGCGTGTTTAAAGTTATA-  
--AA-GATTAGGGTTAAACTCTAACCAAGTTGTGACACACTTGTCTTAGAAATCCA-A  
AACGAAAGTTATCCTAACCAGACCACTTGAACCCACGACAGCTAGGGCACAACTGGGAT  
TAGGTACCCACTATGCCTAGCCGTAAAATATTTACTCACACAA-CCAACCGCCGGGGTA  
TTACGAGCCCAAGCTTAAAACCCAAAGGACTTGACGGTGTCCCACCCACCTAGAGGAGCC  
TGTTCTATAA-TCGATTCCCCC-GATTCACCTCACCCCTTCTAGCCTA--TCAGCCTGT  
ATACCTCCGTCGTAAGCTTACCATATGAACGAT---TTAGTGAGCCAAAAGAT--TTTC  
GTAAATACGTCAGGTCAAGGTGCAGCCCACGAAGTGGCAAGAAATGGGCTACAATTTCTA  
TAA---TAGAACACAACGAAAGACTACATGCAA-CAAAGTCATGAAGGCGGATTTAGTAG  
TAAAAGGAACTAGAGAGTCCATTTAATTAGGCGCTGGGACGCGTACACACCGCCCGTC  
ACCCTCTTCAAATGCCTAA-GATTAG-TTAATAACGAACCATATGCAAAACAGAAGAGGT  
AAGTCGTAACACGGTAAGCGTACTGGAAAGTGTGCTTGGATAAA-CAAATGTAGTTTAA  
TTAAA-GCATTTCGCTTACACCGAAAACATGTCTGTTTAAATCAGATCATTTTGA--GCC  
AAAAACTTAGATCCA--TCACCCGT-AATGGCCACC--CATCAACTCATTTAA--TAAA  
TAAAACATTTTATCT-TTATAGTAAAGGCGATTAATAAATATCTT-GAAGCTATAGAAAC  
TAGTACCGCAAGGGAATAGTGAAATAAAGATGAAAA--CCTTTAAGCACCAAAAAGCAGA

GCCACAACCTCGTACCTTTTGCATCATGGTTTAACTAGTCTAATCAGACAAAGCGCACTT  
TAAGCCTGACCCCCGAAACTAGGTGAGGTACTTAAAAACAGCCTTT-AGAGCCAACCCG  
TCTCTGTTGCAAAAGAGTGGGAAGATTAT-TAAGTAGAGGTGATAGACCTACCGAACCTA  
GAGATAGCTGGTTATTTCAGGAAAAGAACTTAAGTCTACCTTAGGTTTATT-ATAAT-AT  
--GAGTATTCAACA-AACCTTAAGAGCTATTCAAACAAGGTACAGCCTGCTTGAAAAAGG  
ATACAACCTCAACTAG-----AGCAG  
CCACCTTTT-AAAAAGCGTTAAAGCTTCATTA---CTAGTGCAAAAAA-TTTCATTAAC  
CAACTAAAACCCCTAAACCC-CTACTGAATGAATTCATAATTTTATGAAAACCTATCTGT  
TAAACTAGTAACAAGAAGA-AGACCTTCTCCA-AAATGCAAGTATAAGCCGCAATGAAC  
AAGTCATCGGCACTTAAAGCCTGTAATCTACCAGTAGCAACCCA----CCAAGAAAACCC  
TAC-----TGATTAC-AGCGTTAACCTTACACAAGCACATTTTTTGA  
AAGATTAAAAAACAGGAAGGAAGCTCGGCAAATTT-TTAACCCCGCCTGTTTACCAAAAA  
CATCGCCTCTTGGAATCCC---ATAAGAGGTCCAGCCTGCCAGTGACAAA--GTAAAC  
GGCCGCGGTACCCTAACCGTGCAAAGGTAGCGCAATCACTTGTTCTTTAAATGAGGACTA  
GTATGAATGGCATCACGAGGGTTAAGCTGTCTCCCTGCTTTAATCAGTAAAACCTGATTTT  
CCCGTGAAGAAGCGGAATAAACCTATAAGACGAGAAGACCCCATGGAGCTTAAAACCTA  
GTATCACCTGCTACATA--CACATCTAATAAAAAAT-GCAA-CGCTGAT-TTCTAGTTTT  
CGGTTGGGGTGACCACGGAGTAAAATTAAACCTCCGCAACGAAAGGACCTAGCTTCCCTAA  
CCTAAGAGCTACAGCTCTAAGAATCAAC-----AAATTGACTAAA-CTGACCCAATT  
AATT--GATCAATGAACCAAGTTACCCTGGGGATAACAGCGCAATCCATTTCAAGAGCCC  
TTATCGACAAAATGGGTTTACG-ACC-TCGATGTTGGATCAGGGCATCCAAGTG-GCGCAG  
CCGCTA-CTAA-CGGTTC

>M. zeylanica MN534737, MN534523, MN534628

TTATTATCAACTCGATCTCAACTTACACATGCAAGTATCAGCACACCCGTGAGAACGCC  
TTC-ACCTT-AATAGGACAAGGAGCTGGTATCAGGCACAGGTCCTTACAACCCCTAGCCC  
ATAACACCTAGCTTTGCCACACCCTCAAGGGTACTCAGCAGTGATCAATATTGTATATAA  
GCGCCAGCTTGACTCAGTAAGAGAATTT--AGAGCCGGCCAATACGGTGCCAGCCGCCG  
GGCTACACCGCTAGGCTCAAGTTGATAAT-ACTCGGCGTTAAGCGTGTTTAAAGTTATA-  
--AA-GATTAGGGTTAAACTCTAACCAAGTTGTGACACACTTGTTTCTTAGAAATCCA-A  
AACGAAAGTTATCCTAACCCAGACCACTTGAACCCACGACAGCTAGGGCACAAACTGGGAT

TAGGTACCCCACTATGCCTAGCCGTAAAAATATTTACTCACACAA-CCAACCGCCGGGGTA  
TTACGAGCCCAAGCTTAAAACCCAAAGGACTTGACGGTGTCCCACCCACCTAGAGGAGCC  
TGTTCTATAA-TCGATTCCCCC-GATTCACCTCACCCCTTCTAGCCTA--TCAGCCTGT  
ATACCTCCGTCGTAAGCTTACCATATGAACGAT--TTAGTGAGCCAAAAGAT--TTTCC  
GTAAATACGTCAGGTCAAGGTGCAGCCCACGAAGTGGCAAGAAATGGGCTACAATTTCTA  
TAA---TAGAACACAACGAAAGACTACATGCAA-CAAAGTCATGAAGGCGGATTTAGTAG  
TAAAAGGAACTAGAGAGTCCATTTTAATTAGGCGCTGGGACGCGTACACACCGCCCGTC  
ACCCTCTTCAAATGCCTAA-GATTAG-TTAATAACGAACCATATGCAAAACAGAAGAGGT  
AAGTCGTAACACGGTAAGCGTACTGGAAAGTGTGCTTGGATAAA-CAAATGTAGCTTAA  
TTAAA-GCATTTCGCTTACACCGAAAACATGTCTGTTTAAATCAGATCATTTTGA--GCC  
AAAACTTAGCTCCA--TCACCCCT-AATGCCACC--CATCAACTCATTTAA--TAAAA  
TAAAACATTTTATCT-TTATAGTAAAGGCGATTAAAAAATATCTT-GAAGCTATAGAAAC  
TAGTACCGCAAGGGAATAGTGAAATAAAGATGAAAA--CCTTTAAGCACCAAAAAGCAGA  
GCCACAACCTCGTACCTTTTGCATCATGGTTTAACTAGTCTAATCAGACAAAGCGCACTT  
TAAGCCTGACCCCCGAAACTAGGTGAGCTACTTAAAAACAGCCTTT-AGAGCCAACCCG  
TCTCTGTTGCAAAAGAGTGGGAAGATTAT-TAAGTAGAGGTGATAGACCTACCGAACCTA  
GAGATAGCTGGTTATTTCAGGAAAAGAACTTAAGTCCTACCTTAGGTTTATT-ATAAT-AT  
--GAGTATTCAACA-AACCTTAAGAGCTATTCAAACAAGGTACAGCCTGCTTGAAAAAGG  
ATACAACCTCAACTAG-----AGCAG  
CCACCTTTTAAAAAAGCGTTAAAGCTTCATTA---CTAGTGCAAAAAA--TTTCATTAAC  
CAACTAAAACCCCTAAACCC-CTACTGAATGAATTCATAATTTTATGAAAACCTATCTGT  
TAAAAGTAAACAAGAAGA-AGACCTTCTCCA-AAATGCAAGTATAAGCCGCAATGAAC  
AAGTCATCGGCACTTAAAGCCTGTAATCTACCAGTAGCAACCCA----CCAAGAAAACCC  
TAC-----TGATTAC-AGCGTTAACCTTACACAAGCACATTTTGGGA  
AAGATTAAAAAACAGGAAGGAAGTTCGCAAATTT-TTAACCCCGCCTGTTTACCAAAAA  
CATCGCCTCTTGAATCCC---ATAAGAGGTCCAGCCTGCCAGTGACAAA--GTTAAAC  
GGCCGCGGTACCCTAACCGTGCAAAGGTAGCGCAATCACTTGTCTTTAAATGAGGACTA  
GTATGAATGGCATCACGAGGGTTAAGCTGTCTCCCTGCTTTAATCAGTAAAAGTATTTT  
CCCGTGAAGAAGCGGGAATAAACCTATAAGACGAGAAGACCCCATGGAGCTTAAAAGTAA  
GTATCACCTGCTACATA--CACATCTAATAAAAAAT-GCAA-CGCTGAT-TTCTAGTTTT

CGGTTGGGGTGACCACGGAGTAAAATTA AACCTCCGCAACGAAAGGACCTAGCTTCCTAA  
CCTAAGAGCTACAGCTCTAAGAATCAAC-----AAATTGACTAAA-CTGACCCAATT  
AATT--GATCAATGAACCAAGTTACCTGGGGATAACAGCGCAATCCATTTCAAGAGCCC  
TTATCGACAAATGGGTTTACG-ACC-TCGATGTTGGATCAGGGCATCCAAGTG-GCGCAG  
CCGCTA-CTAA-CGGTTC

>M. karunaratnei MN534738, MN534524, MN534629

TTATTATCAACCTAATCTCAACTTACACATGCAAGTATCAGCATAACCCGTGAGAACGCC  
TTTTACCTT-AATAGGACAAGGAGCCGGTATCAGGCACAGGTCCTCACAAC-CCTAGCCC  
ACGACACCTAGCTTTGCCACACCCTCAAGGGTACTCAGCAGTGATCAATATTGAATATAA  
GCGCCAGCTTGACTCAGTTAGAGAATTT--AGAGCCGGCCAATACGGTGCCAGCCGCCGC  
GGCTATACCGCTAGGCTCAAGTTGACAGT-ATTCGGCGTTAAGCGTGTTTAAAGTTCTA-  
-AAA-GATTAGGGTTAAAATCCAACCAAGTTGTGACACACTTGTTCCTTAGAAAATCA-A  
AACGAAAGTTACCCTAACCAGACCACTTGAACCCACGACAGCTAGGACACAACTGGGAT  
TAGGTACCCCACTATGCCTAGCCGTAAAATATTTACTCACACAA-CCAATCGCCTGGGTA  
TTACGAGCTCAAGCTTAAAACCCAAAGGACTTGACGGTGTCCCACCCACCTAGAGGAGCC  
TGTTCTAAAA-TCGATTCCCCC-GATCTACCTCACCCTTCTTGCTTA--TCAGCCTGT  
ATACCTCCGTCGTAAGCTTACCATATGAACGAT---CTAGTGAGCTAAAGGAT--TTTAC  
ATAAATACGTCAGGTCAAGGTGCAGCCCACGAAGCGGTAAGAAATGGGCTATTTTTTGT  
TAA---TAGAACACAACGAAAGACTACATGCAA-CAAAGTCATGAAGGCGGATTTAGTAG  
TAAAAGGAACTAGAGAGTCCATTTTAATTAGGCGCTGGGACGCGTACACACCCGCCCGTC  
ACCCTCTTCAAATGCCTAA-AATTAG-TTAATAACAAACTGCATGCAAAACAGAAGAGGT  
AAGTCGTAACACGGTAAGCGTACTGGAAAGTGTGCTTGGATAAA-CAATATGTAGCTTAA  
TTAAA-GCATTTCGCTTACACCGAAAACATGTCTGTGTAAATCAGATCATCTTGA--GCC  
AAAACTTAGCTCCA--CCACCCCT-AATGCCCACT--CACCAACTTGTA AAA--TAAAA  
TAAAACATTTTACCT-ATTTAGTAAAGGCGATTA AAAAATAACTA-AAAGCTATAGAAAC  
TAGTACCGCAAGGGAATAGTGAAATAAAAATGAAAA--CCTTAAAGCATAAAAAAGCAGA  
GCCACAACCTCGTACCTTTTGCATCATGGTTTAACTAGTCTAATCAGACAAAGCGCACTT  
TAAGCCTGACCCCCGAACTAGGTGAGCTACTTAAAAACAGCCTTT-AGGGCCAACCCG  
TCTCTGTTGCAAAAGAGTGGGAAGATTAT-TAAGTAGAGGTGACAGACCTACCGAACCTA  
GAGATAGCTGGTTATTCAGGAAAAGAACTTAAGTCTACCTTAGGTTTATT-TTAAT-AC

--AAATATTCAACA-AACCTTAAGAGCTATTCAAACAAGGTACAGCCTGTTTTGAAATAGG  
ATACAACCTAAACTA-----TATAAAGTGGGCCTAAAAGCAG  
CCACCTTCC-AAAAAGCGTTAAAGCTTCATTA---CCCATGCAAAAA--TCTCATTAAC  
CAACTAAAACCCCTAACCTA-CTACTGAATGATTTTCATAATCATATGAAAACCTATCTGT  
TAAACTAGTAACAAGAAGA-AGACCTTCTCCA-AAATGCAAGTATAAGCCGCAATGAAC  
AAAACATCGGCATTTAAAGCCTGTAATTTACCAGTAGCAACTCA----CCAAGAAAACCC  
TAC-----TGATTAC-AACGTTAACCTTACACCAGCACATTTATGGA  
AAGATTAAAAAACAGGAAGGAACCTCGGCAAATA-TAAACCCCGCCTGTTTTACCAAAAA  
CATCGCCTCTTGAAACCAC---ATAAGAGGTCCAGCCTGCCAGTGACAAA--GTAAAC  
GGCCGCGGTACCCTAACCGTGCAAAGGTAGCACAATCACTTGTTCTTTAAATGAGGACTA  
GTATGAACGGCATCACGAGGGTTAAGCTGTCTCCCTGCTTTAATCAGTTAAACTGATCTT  
CCCGTGAAGAAGCGGAATAAACTTATAAGACGAGAAGACCCCATGGAGCTTAAACTCA  
GTATCACCTGCTATTTTA-TAAACCCAATAACAAT-GCAA-TACTGAT-TCCTAGTTTT  
CGGTTGGGGTGACCACGGAGTAAAACAAAACCTCCGCAACGAAAGGACCTAATTACCTAA  
TCCAAGAGCTACAACCTAAGAATCAAT-----AAATTGACTAAA-CTGACCCAATT  
ATTT--GATCAATGAACCAAGTTACCCTGGGGATAACAGCGCAATCCATTTCAAGAGCCC  
CTATCGACAAAATGGGTTTACG-ACC-TCGATGTTGGATCAGGACATCCAAGTG-GCGCAG  
CCGCTA-CTAA-AGGTTC

>M. karunaratnei MN534739, MN534525, MN534630

TTATTATCAACCTAATCTCAACTTACACATGCAAGTATCAGCATAACCCGTGAGAACGCCC  
TTTTACCTT-AATAGGACAAGGAGCCGGTATCAGGCACAGGTCCTCACAAAC-CCTAGCCC  
ACGACACCTAGCTTTGCCACACCCTCAAGGGTACTCAGCAGTGATCAATATTGAATATAA  
GCGCCAGCTTGACTCAGTTAGAGAATTT--AGAGCCGGCCAATACGGTGCCAGCCGCCGC  
GGCTATACCGCTAGGCTCAAGTTGACAGT-ATTGGCGTTAAGCGTGTTTAAAGTTCTA-  
-AAA-GATTAGGGTTAAACTCCAACCAAGTTGTGACACACTTGTTCTTAGAAAATCA-A  
AACGAAAGTTACCCTAACCCAGACCACTTGAACCCACGACAGCTAGGACACAACTGGGAT  
TAGGTACCCCACTATGCCTAGCCGTAAAATATTTACTTACACAA-CCAATCGCCTGGGTA  
TTACGAGCTCAAGCTTAAAACCCAAGGACTTGACGGTGTCCCACCCACCTAGAGGAGCC  
TGTTCTAAAA-TCGATTCCCCC-GATCTACCTCACCCTTCTTGCTTA--TCAGCCTGT  
ATACCTCCGTCGTAAGCTTACCATATGAACGAT---CTAGTGAGCTAAAGGAT--TTTAC

ATAAATACGTCAGGTCAAGGTGCAGCCCACGAAGCGGTAAGAAATGGGCTACAATTTCTA  
TAA---TAGAACACAACGAAAGACTACATGCAA-CAAAGTCATGAAGGCGGATTTAGTAG  
TAAAAAGGAACTAGAGAGTCCATTTTAATTAGGCGCTGGGACGCGTACACACCGCCCGTC  
ACCCTCTTCAAATGCCTAA-AATTAG-TTAATAACAAAATGCATGCAAAACAGAAGAGGT  
AAGTCGTAACACGGTAAGCGTACTGGAAAGTGTGCTTGGATAAA-CAATATGTAGCTTAA  
TTAAA-GCATTTCGCTTACACCGAAAACATGTCTGTGTAAATCAGACCATCTTGA--GCC  
AAAACTTAGCTCCA--CCACCCCT-AATGCCCACT--CACCAACTTGTA AAA--TAAAA  
TAAAACATTTTACCT-ATTTAGTAAAGGCGATTA AAAAATAACTA-AAAGCTATAGAAAC  
TAGTACCGCAAGGGAATAGTGAAATAAAAATGAAAA--CCTTAAAGCATCAAAAAGCAGA  
GCCACAACCTCGTACCTTTTGCATCATGGTTTAACTAGTCTAATCAGACAAAGCGCACTT  
TAAGCCTGACCCCCGAAACTAGGTGAGCTACTTAAAAACAGCCTTT-AGGGCCAACCCG  
TCTCTGTTGCAAAAGAGTGGAAGATTAT-TAAGTAGAGGTGACAGACCTACCGAACCTA  
GAGATAGCTGGTTATTTCAGGAAAAGAACTTAAGTCCTACCTTAGGTTTATT-TTAAT-AC  
--AAATATTCAACA-AACCTTAAGAGCTATTCAAACAAGGTACAGCCTGTTTGAAATAGG  
ATACAACCTAAACTA-----TATAAAGTGGGCCTAAAAGCAG  
CCACCTTCC-AAAAGCGTTAAAGCTTCATTA--CCCATGCAAAAA--TCTCATTAAC  
CAACTAAAACCCCTAACCTA-CTACTGAATGATTTCATAATCATATGAAAACCTATCTGT  
TAAAAGTAGTAACAAGAAGA-AGACCTTCTCCA-AAATGCAAGTATAAGCCGCAATGAAC  
AAAACATCGGCATTTAAAGCCTGTAATTTACCAGTAGCAACTCA----CCAAGAAAACCC  
TAC-----TGATTAC-AACGTTAACCTTACACCAGCACATTTATGGA  
AAGATTAAAAAACAGGAAGGAACTCGGC AAACTA-TAAACCCCGCCTGTTTACCAAAAA  
CATCGCCTCTTGAAACCAC---ATAAGAGGTCCAGCCTGCCAGTGACAAA--GTTAAAC  
GGCCGCGGTACCCTAACCGTGCAAAGGTAGCGCAATCACTTGTTCTTTAAATGAGGACTA  
GTATGAACGGCATCACGAGGGTTAAGCTGTCTCCCTGCTTTAATCAGTTAAACTGATCTT  
CCCGTGAAGAAGCGGGAATAA ACTTATAAGACGAGAAGACCCCATGGAGCTTAAACTCA  
GTATCACCTGCTATTTTA-TAAACCAATAAACAAT-GCAA-TACTGAT-TCCTAGTTTT  
CGGTTGGGGTGACCACGGAGTAAAACAAAACCTCCGCAACGAAAGGACCTAATTACCTAA  
TCCAAGAGCTACA ACTCTAAGAATCAAT-----AAATTGACTAAA-CTGACCCAATT  
ATTT--GATCAATGAACCAAGTTACCCTGGGGATAACAGCGCAATCCATTTCAAGAGCCC  
CTATCGACAAATGGGTTTACG-ACC-TCGATGTTGGATCAGGGCATCCAAGTG-GCGCAG

CCGCTA-CTAA-AGGTTC

>Microhyla sp. 2 MN534740, MN534526, MN534631

TTATTATCAACTCATCCTCAATTTACACATGCAAGTATCAGCACACCCGTGAGAACGCC  
TTC-ACCTT-TTCAGGACAAGGAGCTGGTATCAGGCACAG--ATTTC AAC-TCTAGCCC  
ATAACACCTAGCTTTGCCACACCCTCAAGGGTATTCAGCAGTGATTAACCTTGTTAATAA  
GCGCCAGCTTGACTCAGTTAGAGGACTT--AGAGCCGGCTAATACGGTGCCAGCCGCCGC  
GGCTACACCGCTAGGCTCAAGTTGATAAT-CTCGGCGTTAAGCGTGTTTAAAGTACCA-  
-AAA-GACTAGAACTAACTTCAACCAAGTTGTGACACACTTGTTTTAAAGAAACCCGAA  
AACGAAAGTTGTTCTAACCTGACTACTTGAACCCACGACAGCTAGGGCACAACCTGGGAT  
TAGGTACCCCACTATGCCTAGCCGTAAAATATTAACCTACACCACTTAACCGCCAGGGAA  
TTACGAGCCCAAGCTTAAAACCCAAAGGACTTGACGGTGTCCACCCCCCTAGAGGAGCC  
TGTTCTATAA-TCGATTCTCCCC-GATATACCCGACCATTTTTTGGCCTA--TCAGCCTGT  
ATACCTCCGTCGTAAGCTTACCATATGAACGAC--TTAGTGAGCTAAAAGAT--TTTTC  
GTAAATACGTCAGGTCAAGGTGCAGCCACGAAATGGCAAGCAATGGGCTACAATTTCTA  
TGC---TAGAACACAACGAAAGGCTGTGTGCAA-CCCAGTCTTGAAGGCGGATTTAGTAG  
TAAAAGGAAGTAGAGAGTCCTTTTTAATTAGGCGCTGGGACGCGTACACACCGCCCGTC  
ACCCTCTTCATAAGTATTA-AACAAG-TTTTTAACAAG-ATTTTTCTATGCAGAAGAGGT  
AAGTCGTAACACGGTAAGTGTACTGGAAAGTGCACCTTGGATTAA-CAAAATGTAGCTTAA  
CTAAA-GCATTTCGCTTACACCGAAAACATGTCTTTTTTAAACAGGACCATTTTGA--GCC  
TAAAACCTAGCCCTA--CTAACATACAATGCCCACT--CAACAACAACCCCA--TCAA  
TAAAACATTTTACTA-ATTTAGTAAAGGCGATTGAAAAATATTTA-GGAGCTATAGAGAC  
CAGTACCGCAAGGGAAAAGTGAAATATTTATGAAAAA-CTTTTAAGCACTATAAAGCAGA  
GCCACAACCTCGTACCTTTTGCATCATGGTTTAACTAGTTTAAACCAGACAAAACGCAACT  
TTAGCCTGACTTCCCGAAACTAGGTGAGCTACTTAAAAACAGCCTGTT-GGGCCAACCCG  
TCTCTGTTGCAAAAGAGTGGAAGATTAT-TAAGTAGTGGTGACAAACCTACCGAACCTA  
GAGATAGCTGGTTATTCAGGAAAAGAATTTAAGTTCTACCTTAGGTTTAT-GTAAC-AC  
--AAATACTAAATA-AACCTTAAGAGCTATTCAAACAAGGTACAGCCTGTTTGAAATAGG  
GTACAACCTCCTTTAGCGGGTAAC-----CAG  
CCACCTTT-AAAAAGCGTTAAAGCTTTCTTA---CTTCAAGTCAAAA--TCCCTC-CAC  
ACCCTTAAACCCCTAATTTA-CTACTGAATGACTTCATAATTTTATGAAAATCTATATGT



TAAACTAGTAACAAGAAGA-AGCCCTTCTCCA-AAATGTAAGCTTAAGCCACAATGAAC  
AAAGCACTGGCACTTAAAGTCTATAATCCACTAGTAACAACCGCC---TCAAGAAAACAC  
TAC-----TGCTTAT-AACGTTAACCTTACACTAGTACATTTTTTGGGA  
AAGATTAATAAATGGGAAGGAACTCGGCAAATAA-TTAACCCCGCCTGTTTACCAAAAA  
CATCGCCTTCTGAAGCCT----ATAGAAGGTCCAGCCTGCCAGTGACAAA--GTTAAAC  
GGCCGCGGTACCCTAACCGTGCAAAGGTAGCGCAATCACTTGTTCTTTAAATGAGGACTA  
GTATGAATGGCATCACGAGGGTTACACTGTCTCCCCACTTTAATCAGTGAAACTGATCTC  
CCCGTGAAGAAGCGGGGATAAACATATAAGACGAGAAGACCCCATGGAGCTTTAAACTCA  
GTACCACCTGCCACTTA--AAAAGCCTATAAACCAC-GCAG-CTCTGAT-TACTAGTTTT  
TGGTTGGGGTGACCGCGGAGTAAAACAAAACCTCCACAACGAAAGGAACTGATATCCTAA  
TACAAGAGCTACACCTCTAAGAATTAAT-----AAATTAACTAAA-CTGACCCAATT  
AATT--GATCAATGAACCAAGTTACCCTGGGGATAACAGCGCAATCCATTTCAAGAGCCC  
CTATCGACAAATGGGTTTACG-ACC-TCGATGTTGGATCAGGGTGTCCAAGTG-GCGCAG  
CCGCTA-CTAA-TGGTTC

>Microhyla sp. 2 MN534741, MN534527, MN534632

TTATTATCAACTCATCCTCAATTTACACATGCAAGTATCAGCACACCCGTGAGAACGCC  
TTC-ACCTT-TTCAGGACAAGGAGCTGGTATCAGGCACAG---ATTTCAAC-TCTAGCCC  
ATAACACCTAGCTTTGCCACACCCTCAAGGGTATTTCAGCAGTGATTAACCTTGTTAATAA  
GCGCCAGCTTGACTCAGTTAGAGGACTT--AGAGCCGGCTAATACGGTGCCAGCCGCCGC  
GGCTACACCGCTAGGCTCAAGTTGATAAT-ACTCGGCGTTAAGCGTGTTTAAAGTACCA-  
-AAA-GACTAGAACTAAACTTCAACCAAGTTGTGACACACTTGTTTTAAAGAAACCCGAA  
AACGAAAGTTGTTCTAACCTGACTACTTGAACCCACGACAGCTAGGGCACAAACTGGGAT  
TAGGTACCCCACTATGCCTAGCCGTAAAAATATTAACCTACACCACTTAACCGCCAGGGAA  
TTACGAGCCCAAGCTTAAAACCCAAAGGACTTGACGGTGTCCCACCCCTAGAGGAGCC  
TGT-CTATAA-TCGATTCTCCCC-GATATACCCGACCATTTTTTGGCCTA--TCAGCCTGT  
ATACCTCCGTTCGTAAGCTTACCATATGAACGAC---Ttagtgagctaaaagat--TTTTC  
GTAAATACGTCAGGTCAAGGTGCAGCCCACGAAATGGCAAGCAATGGGCTACAATTTCTA  
TGC---TAGAACACAACGAAAGGCTGTGTGCAA-CCCAGTCTTGAAGGCGGATTTAGTAG  
TAAAAAGGAAGTAGAGAGTCCTTTTTTAATTAGGCGCTGGGACGCGTACACACCGCCCGTC  
ACCCTCTTCATAAGTATTA-AACAAG-TTTTTAACAAG-ATTTTTCTATGCAGAAGAGGT

AAGTCGTAACACGGTAAGTGTACTGGAAAAGTGCACCTGGATTAA-CAAAATGTAGCTTAA  
CTAAA-GCATTTCGCTTACACCGAAAACATGTCTTTTTTAAACAGGACCATTTTGA--GCC  
TAAAACCTAGCCCTA--CTAACATACAATGCCCACT--CAACAACAACCCCA--TCAA  
TAAAACATTTTACTA-ATTTAGTAAAGGCGATTGAAAAATATTTA-GGAGCTATAGAGAC  
CAGTACCGCAAGGGAAAAGTGAATATTTATGAAAA-CTTTTAAGCACTATAAAGCAGA  
GCCACAACCTCGTACCTTTTGCATCATGGTTTAACTAGTTTAAACCAGACAAAACGCAACT  
TTAGCCTGACTTCCCGAAACTAGGTGAGCTACTTAAAAACAGCCTGTT-GGGCCAACCCG  
TCTCTGTTGCAAAGAGTGGGAAGATTAT-TAAGTAGTGGTGACAAACCTACCGAACCTA  
GAGATAGCTGGTTATTTCAGGAAAAGAATTTAAGTTCTACCTTAGGTTTAT-GTAAC-AC  
--AAATACTAAATA-AACCTTAAGAGCTATTCAAACAAGGTACAGCCTGTTTGAAATAGG  
GTACAACCTCCTTTAGCGGGTAAC-----CAG  
CCACCTTT-AAAAAGCGTTAAAGCTTTCTTA--CTTCAAGTCAAAA--TCCCTCACAC  
ACCCTTAAACCCCTAATTTA-CTACTGAATGACTTCATAATTTTATGAAAATCTATATGT  
TAAAACCTAGTAACAAGAAGA-AGCCCTTCTCCA-AAATGTAAGCTTAAGCCACAATGAAC  
AAAGCACTGGCACTTAAAGTCTATAATCCACTAGTAACAACCGCC--TCAAGAAAACAC  
TAC-----TGCTTAT-AACGTTAACCTTACACTAGTACATTTTTTGGGA  
AAGATTAAAAAATGGGAAGGAACTCGGCAAATAA-TTAACCCCGCCTGTTTACCAAAAA  
CATCGCCTTCTGAAGCCT----ATAGAAGGTCCAGCCTGCCAGTGACAAA--GTTAAAC  
GGCCGCGGTACCCTAACCGTGCAAAGGTAGCGCAATCACTTGTTCTTTAAATGAGGACTA  
GTATGAATGGCATCACGAGGGTTACACTGTCTCCCACTTTAATCAGTGAAACTGATCTC  
CCCGTGAAGAAGCGGGGATAAACATATAAGACGAGAAGACCCCATGGAGCTTTAAACTCA  
GTACCACCTGCCACTTA--AAAAACCTATAAACCAC-GCAG-CTCTGAT-TACTAGTTTT  
TGTTTGGGGTGACCGCGGAGTAAAACAAAACCTCCACAACGAAAGGAACTGATATCCTAA  
TACAAGAGCTACACCTCTAAGAATTAAT-----AAATTAACATAA-CTGACCCAATT  
AATT--GATCAATGAACCAAGTTACCCTGGGGATAACAGCGCAATCCATTTCAAGAGCCC  
CTATCGACAAATGGGTTTACG-ACC-TCGATGTTGGATCAGGGTGTCCAAGTG-GCGCAG  
CCGCTA-CTAA-CGGTTC

>Microhyla sp. 2 MN534742, MN534528, MN534633

TTATTATCAACTCATCCTCAACTTACACATGCAAGTATCAGCACACCCGTGAGAACGCC  
TTC-ACCTT-TTCAGGACAAGGAGCTGGTATCAGGCACAG--ACTTCAAC-TCTAGCCC

ATAACACCTAGCTTTGCCACACCCTCAAGGGTATTCAGCAGTGATTAACCTTGTTAATAA  
GCGCCAGCTTGACTCAGTTAGAGGACTT--AGGGCCGGCTAATACGGTGCCAGCCGCCGC  
GGCTACACCGCTAGGCTCAAGTTGATAAT-ACTCGGCGTTAAGCGTGTTTAAAGTACCA-  
-AAA-GACTAGAACTAAACTTCAACCAAGTTGTGACACACTTGTTTTAAAGAAACCCGAA  
AACGAAAGTTGTTCTAACCTGACTACTTGAACCCACGACAGCTAGGGCACAACTGGGAT  
TAGGTACCCCACTATGCCTAGCCGTAAAATATTAACCTACACCACTTAACCGCCAGGGAA  
TTACGAGCCCAAGCTTAAAACCCAAAGGACTTGACGGTGTCCACCCCCCTAGAGGAGCC  
TGT-CTATAA-TCGATTCTCCCC-GATACACCCGACCATTTTTTGGCCTA--TCAGCCTGT  
ATACCTCCGTCGTAAGCTTACCATATGAACGAC---TTAGTGAGCTAAAAGAT--TTTTC  
GTAAATACGTCAGGTCAAGGTGCAGCCCACGAAATGGCAAGCAATGGGCTACAATTTCTA  
TGC--TAGAACACAACGAAAGGCTGTGTGCAA-CCCAGTCTTGAAGGCGGATTTAGTAG  
TAAAAGGAAGTAGAGAGTCCTTTTTAATTAGGCGCTGGGACGCGTACACACCGCCCGTC  
ACCCTCTTCATAAGTATTA-AACAAG-TTTTTAACAAG-ATTTTTCTATGCAGAAGAGGT  
AAGTCGTAACACGGTAAGTGTACTGGAAAGTGCACCTTGGATTAA-CAAAATGTAGCTTAA  
CTAAA-GCATTTCGCTTACACCGAAAACATGTCTTTTTTAAACAGGACCATTTTTGA--GCC  
TAAAACCTAGCCCTA--CTAACATACAATGCCCACT--CAACAACAACCCCA--TCAAA  
TAAAACATTTTACTA-ATTTAGTAAAGGCGATTGAAAAATATTTA-GGAGCTATAGAGAC  
CAGTACCGCAAGGGAAAAGTGAATATTTATGAAAAA-CTTTTAAGCACTATAAAGCAGA  
GCCACAACCTCGTACCTTTTGCATCATGGTTTAACTAGTTTAAACCAGACAAAACGCAACT  
TTAGCCTGACTTCCCGAAACTAGGTGAGCTACTTAAAAACAGCCTGTT-GGGCCAACCCG  
TCTCTGTGCGAAAAGAGTGGGAAGATTAT-TAAGTAGTGGTGACAAACCTACCGAACCTA  
GAGATAGCTGGTTATTTCAGGAAAAGAATTTAAGTTCTACCTTAGGTTTTAT-GTAAC-AC  
--AAATACTAAATA-AACCTTAAGAGCTATTCAAACAAGGTACAGCCTGTTTTGAAATAGG  
GTACAACCTCCTTTAGCGGGTAAC-----CAG  
CCACATTT-AAAAAGCGTTAAAGCTTTCTTA---CTTCAAGTCAAAA--TCCCTCACAC  
ACCCTTAAACCCCTAATTTA-CTACTGAATGACTTCATAATTTTATGAAAATCTATATGT  
TAAAACCTAGTAACAAGAAGA-AGCCCTTCTCCA-AAATGTAAGCTTAAGCCACAATGAAC  
AAAGCACTGGCACTTAAAGTCTATAATCCACTAGTAACAACCGCC---TCAAGAAAACAC  
TAC-----TGCTTAT-AACGTTAACCTTACACTAGTACATTTTTTGA  
AAGATTAAAAAAATGGGAAGGAACTCGGCAAATAA-TTAACCCCGCCTGTTTACCAAAAA

CATCGCCTTCTGAAGCCT----ATAGAAGGTCCAGCCTGCCAGTGACAAA--GTTAAAC  
GGCCGCGGTACCCTAACCGTGCAAAGGTAGCGCAATCACTTGTCTTTAAATGAGGACTA  
GTATGAATGGCATCACGAGGGTTACTGTCTCCCCACTTTAATCAGTGAAACTGATCTC  
CCCGTGAAGAAGCGGGGATAAACATATAAGACGAGAAGACCCCATGGAGCTTTAAACTCA  
GTACCACCTGCCACTTA--AAAAACCTATAAACCCAC-GCAG-CTCTGAT-TACTAGTTTT  
TGGTTGGGGTGACCGCGGAGTAAACAAAACCTCCACAACGAAAGGAACTGATATCCTAA  
TACAAGAGCTACACCTCTAAGAATTAAT-----AAATTA ACTAAA-CTGACCCAATT  
AATT--GATCAATGAACCAAGTTACCCTGGGGATAACAGCGCAATCCATTTCAAGAGCCC  
CTATCGACAAATGGGTTTACG-ACC-TCGATGTTGGATCAGGGTGTCCAAGTG-GCGCAG  
CCGCTA-CTAA-CGGTTC

>Microhyla sp. 2 MN534743, MN534529, MN534634

TTATTATCAGCCCACCCTCAATTTACACATGCAAGTATCAGCACACCCGTGAGAACGCC  
TTC-ACCTT-TTCAGGACAAGGAGCTGGTATCAGGCACAG--ACTTAAAC-TCTAGCCC  
ATAACACCTAGCTTTGCCACACCCTCAAGGGTATTCAGCAGTGATTAACCTTGTTAATAA  
GCGCCAGCTTGACTCAGTTAGAGGACTT--AGAGCCGGCTAATACGGTGCCAGCCGCCGC  
GGCTACACCGCTAGGCTCAAGTTGATAAT-ACTCGGCGTTAAGCGTGTTTAAAGTACCA-  
-AAA-GACTAGA ACTAACTTCAACCAAGTTGTGACACACTTGTTTTAAAGAAACCCGAA  
AACGAAAGTTGTTCTAACCTGACTACTTGAACCCACGACAGCTAGGGCACAACTGGGAT  
TAGGTACCCCACTATGCCTAGCCGTAAAATATTAACCTACCCACTTAACCGCCAGGGAA  
TTACGAGCCCAAGCTTAAAACCCAAAGGACTTGACGGTGTCCCACCCCTAGAGGAGCC  
TGTTCTAAAA-TCGATTCTCCCC-GATATACCCGACCATTTTTGGCCTA--TCAGCCTGT  
ATACCTCCGTCGTAAGCTTACCATATGAACGAC---TTAGTGAGCTAAAAGAT--TTTTC  
GTAAATACGTCAGGTCAAGGTGCAGCCCACGAAATGGCAAGCAATGGGCTACAATTTCTA  
TGC---TAGAACACAACGAAAGGCTGTGTGCAA-CCCAGTCTTGAAGGCGGATTTAGTAG  
TAAAAGGAAGTAGAGAGTCCTTTTTAATTAGGCGCTGGGACGCGTACACACCGCCCGTC  
ACCCTCTTCATAAGTACTA-AACAAG-TTTTTAACAAG-ATTTTTCTATGCAGAAGAGGT  
AAGTCGTAACACGGTAAGTGTACTGGAAAGTGCACTTGGATTAA-CAAATGTAGCTTAA  
CTAAA-GCATTTGCTTACACCGAAAACATGTCTTTTTTAAACAGGACCATTTTTGA--GCC  
TAAAACCTAGCCCTA--CTAACATACAATGCCCACT--CAACAACAACCCTCA--TCAA  
TAAAACATTTTACTA-ATTTAGTAAAGGCGATTGAAAAATATTTA-GGAGCTATAGAAAC

CAGTACCGCAAGGGAAAGGTGAAATATTTATGAAAAA-CTTTTAAGCACTATAAAGCAGA  
GCCACAACCTCGTACCTTTTGCATCATGGTTTAACTAGTTTAAACCAGACAAAACGCAACT  
TTAGCCTGACTTCCCGAAACTAGGTGAGCTACTTAAAAACAGCCTGTT-GGGCCAACCCG  
TCTCTGTTGCAAAAGAGTGGGAAGATTAT-TAAGTAGTGGTGACAAACCTACCGAACCTA  
GAGATAGCTGGTTATTTCAGGAAAAGAATTTAAGTTCTACCTTAGGTTTCAT-GTAAC-AC  
--AAATACTAAATA-AACCTTAAGAGCTATTCAAACAAGGTACAGCCTGTTTGAAATAGG  
ATACAACCTCC-TTAGCGGGTAAC-----  
-----AAAAAGCGTTAAAGCTTTCTTA---CTTCAAGTCAAAA--TTTCTTACAC  
ACCCTCAAACCCGTAATTTA-CTACTGAATGACTTCATAATTTTATGAAAACCTATATGT  
TAAACTAGTAACAAGAAGA-AGCCCTTCTCCA-AAATGTAAGCTTAAGCCACAATGAAC  
AAAGCACTGGCACTTAAAGTCTATAATCCACTAGTAGTAACCCC----TCAAGAAAACAC  
TAC-----TGCTTAT-AACGTCAACCTTACACTAGTACATTTTTTGGA  
AAGATTAAAAAATGGGAAGGAAGTTCGGCAAATAA-TTAACCCCGCCTGTTTACCAAAAA  
CATCGCCTTCTGAAACCT----ATAGAAGGTCCAGCCTGCCAGTGACAAA--GTTAAAC  
GGCCGCGGTACCCTAACCGTGCAAAGGTAGCGCAATCACTTGTTCTTTAAATGAGGACTA  
GTATGAATGGCATCACGAGGGTTACACTGTCTCCCCACTTTAATCAGTGAAACTGATCTC  
CCCGTGAAGAAGCGGGGATAAACATATAAGACGAGAAGACCCCATGGAGCTTTAAACTCA  
GTACCACCTGCCACTTA--AAAAACCTATAAACAC-GCAG-CTTTGAT-TACTAGTTTT  
TGGTTGGGGTGACCGCGGAGTAAAATAAAACCTCCACAACGAAAGGAACTAATATCCTAA  
TATAAGAGCTACACCTCTAAGAATTAAT-----AAATTAACATAA-CTGACCCAATT  
AATT--GATCAATGAACCAAGTTACCCTGGGGATAACAGCGCAATCCATTTCAAGAGCCC  
CTATCGACAAAATGGGTTTACG-ACC-TCGATGTTGGATCAGGGTGTCCAAGTG-GCGCAG  
CCGCTA-CTAA-CGGTTC

>M. superciliaris MN534744, MN534530, MN534635

TTACTATCAACCCCTCTCGACTTACACATGCAAGTATCAGCACCCCGTGAGAACGCC  
TTT-ACCTT-TTTAGGACAAGGAGCTGGTATCAGGCACAG---AAT-----TCTAGCCC  
ATAACACCTAGCTTTGCCACACCCTCAAGGGTATTTCAGCAGTGATTAACATTGTCCATAA  
GCGCCAGCTTGACACAGTCAGAGAGCTG--AGGGCCGGCCAATACGGTGCCAGCCGCCG  
GGCTACACCGCGAGGCTCAAGTTGATAAT-ATTCGGCGTTAAGCGTGTTTAAAGTGCCA-  
ATAA-GACTAGAATTAACCTTCAACCAAGTTGTGACACACTTGTCTTAAGAAAGCCAAA

AACGAAAGTTATTCTAACCAGACCACTTGAACCCACGACAGCTAAGATACAAACTGGGAT  
TAGGTACCCCACTATGCTTAGCCGTAAAACATTCACCTTACACCCCTTAACCGCCCGGAA  
TTACGAGCCCAAGCTTAAAACCCAAAGGACTTGACGGTGTCCCACCCACCTAGAGGAGCC  
TGATCTAAAA-TCGATTCTCCCC-GATCTACCTCACCCTTCTAGCCTA--TCAGCCTGT  
ATACCTCCGTTCGTAGGCTTACCATATGAACGAC--TCAGTGAGCTAAAAGAT--TATTC  
ATAAATACGTCAGGTCAAGGTGCAGCTTACGAAGCGGCAAGTAATGGGCTACAATTTCTA  
CAA---TAGAACACA-CGAAAGACTACATGCAA-CCCAGTCATGAAGGCGGATTTAGAAG  
TAAAAGGAAACAGAGAGTCCTTTTTAATTAGGCGCTGGGACGCGTACACACCGCCCGTC  
ACCCTCTTCAAATACTACA-GCAAAGCTATATAACAAA-CTAACACCAAACAGAAGAGGT  
AAGTCGTAACACGGTAAGCGTACTGGAAAGTGCCTTGGATTAA-CAAAGTGTAGCTTAA  
CCAAA-GCATCTCGCTTACACCGAGAATATATCTGTTCAACTCGGATCACCTTGA--GCC  
AAAAACCTAGCTCCC--CTACTTTAC-CTATACTCGCCCAACAGTTACCACAG--CATAA  
TAAAACATTTTACCC-ATTTAGTAAAGGCGATTAAAAAATGTCTA-GAAGCTATAGAAAC  
CAGTACCGCAAGGAAAAGTGAAATAAAAAGTGAAAAA-TTTTAAAGCATTAAAAAGAAGA  
GCTACAACCTCGTACCTTTTGCATCATGGTTTAACTAGTTTAAACCAGACAAAACGCAATT  
TCAGCCTGACATCCCGAAACTAGGTGAGCTACTTAAAAACAGCCTCA-AGGGCAAACCCG  
TCTCTGTTGCAAAAGAGTGGAAGATTAT-TAAGTAGTGGTGACAGACCTACCGAACCTA  
GAGATAGCTGGTTACTCAAAAAAGAATTTAAGTTCTACCTTAGGTTTTAC-GTAAC-AC  
--AAATACCCCCCA-AACCTTAAGAGCTATTCAAACAAGGTACAGCCTGTTTTGAAATAGG  
GTACAACCTCGCCTAGCGGGTAAC-----ATAAGTGGGCCTAAAAGCAG  
CCACCTTCTAAAAAGCGTTAAAGCTTCATTA---CCCTTAATAAAAA-TACCGCCA-AC  
TAAC'TTAAACCCCTAAACCC-CTATTGAGTGACTTCATAAATTTATGAAAATCTATCTGT  
TAAAAGTAGTAACAAGAAGA-AGCCCTTCTCCA-AAATGTAAGTATAAGCCACAATGAAC  
AAAGCATCGGCAC'TTAAAGCCAATAAACATCCAGTAACAACCC-----GCAAGAAAACCC  
TAC-----TGCCAAC-AACGTTAATCTTACACCAGCACATTTATGGA  
AAGATTTAAAGAGTAGGAAGGAAGTTCGGCAAACAA-CTAACCCCGCCTGTTTACCAAAAA  
CATCGCCTCCTGAAACCC-----ATAAGAGGTCCAGCCTGCCAGTGACTTA--GTAAAC  
GGCCGCGGTACCC'TAACCGTGCAAAGGTAGCGCAATCACTTGTTC'TTAAATGAGGACTA  
GTATGAACGGCATCACGAGGGTTACTGTCTCCCTACTTTAATCAGTGAAACTAATCCC  
CCCGTGAAGAAGCGGGGATAAACATATAAGACGAGAAGACCCCATGGAGCTTTAAACTCA

GTACCACCTGCCACTAC--TAAACTTATAAACAC-GCAG-TGCTGTC-TACTGGTTTT  
CGGTTGGGGTGACCACGGAGTAAACAAATCCTCCACAACGAAAGGAACCTAACCAACCTAA  
TCTAAGAGCCACACCTCTAAGAATCAAT-----AACTGACTAAA-CTGATCCAATT  
ATTT--GATCAATGAACCAAGTTACCCTGGGGATAACAGCGCAATCCATTTCAAGAGCCC  
ATATCGACAAATGGGTTTACG-ACC-TCGATGTTGGATCAGGGTATCCAAGTG-GCGCAG  
CCGCTA-CTAA-AGGTTC

>M. superciliaris MN534745, MN534636

TTACTATCAACCCCTCTCGACTTACACATGCAAGTATCAGCACCCCGTGAGAACGCC  
TTT-ACCTT-TTTAGGACAAGGAGCTGGTATCAGGCACAG---AAT-----TCTAGCCC  
ATAACACCTAGCTTTGCCACACCCTCAAGGGTATTTCAGCAGTGATTAACATTGTCCATGA  
GCGCCAGCTTGACACAGTCAGAGAGCTG--AGGGCCGGCCAATACGGTGCCAGCCGCCGC  
GGCTACACCGGAGGCTCAAGTTGATAAT-ATTCGGCGTTAAGCGTGTTTAAAGTGCCA-  
ATAA-GACTAGAATTAACTTTAACCAAGTTGTGACACACTTGTTCCTTAAGAACTCAAA  
AACGAAAGTTATTCTAACCAGACCACTTGAACCCACGACAGCTAAGATACAACTGGGAT  
TAGGTACCCACTATGCTTAGCCGTAAACATTTACTTACACCCCTTAACCGCCCGGAA  
TTACGAGCCCAAGCTTAAACCCAAAGGACTTGACGGTGTCCACCCACCTAGAGGAGCC  
TGTTCTAAAA-TCGATTCTCCCC-GATCTACCTCACCCTTCTAGCCTA--TCAGCCTGT  
ATACCTCCGTCGTAAGCTTACCATATGAACGAC---TCAGTGAGCTAAAAGAT--TATTC  
ATAAATACGTCAGGTCAAGGTGCAGCCTACGAAGCGGCAAGTAATGGGCTACAATTTCTA  
CAA--TAGAACACA-CGAAAGACTACATGCAA-CCCAGTCATGAAGGCGGATTTAGAAG  
TAAAAAGGAAACAGAGAGTCCTTTTTAATTAGGCGCTGGGACGCGTACACACCGCCCGTC  
ACCCTCTTCAAATACTACA-GCAAAGCTATATAACAAA-CTAACACCAAACAGAAGAGGT  
AAGTCGTAACACGGTAAG-----  
-----  
-----AA  
TAAAACATTTTACCC-ATTTAGTAAAGGCGATTAATAATTTTAA-GAAGCTATAGAAAC  
CAGTACCGCAAGGTAAAAGTGAAATAAAAATGAAAA-TTTTTAAGCATTAATAAGCAGA  
GCTACAACCTCGTACCTTTTGCATCATGGTTTAACTAGTCTAACCCAGACAAAACGCAATT  
TCAGCCTGACATCCCGAACTAGGTGAGCTACTTAAAAACAGCCTCA-AGGGCAAACCCG  
TCTCTGTTGCAAAAGAGTGGGAAGATTAT-TAAGTAGTGGTGACAGACCTACCGAACCTA

GAGATAGCTGGTACTCAAAAAAGAATTTAAGTTCTACCTTAGGTTTTAC-GTAAC-AC  
--AAATACCCCACA-AACCTTAAGAGCTATTCAAACAAGGTACAGCCTGTTTTGAAATAGG  
GTACAACCTCGCCTAGCGGG-----ATAAGTGGGCCTAAAAGCAG  
CCACCTTCTAAAAAGCGTTAAAGCTTCATTA---CCCTTAATAAAAA-TACCGCCA-AC  
TAACTTTAACCCCTAAACCC-CTATTGAGTGACTTCATAAATTTATGAAAATCTATCTGT  
TAAACTAGTAACAAGAAGA-AGCCCTTCTCCA-AAATGTAAGTATAAGCCACAATGAAC  
AAAGCATCGGCACTTAAAGCCAATAAACATCCAGTAACAACCC-----GCAAGAAAACCC  
TAC-----TGCCAAC-AACGTTAATCTTACACCAGCACATTTATGGA  
AAGATTTAAAGAGTTGGAAGGAACCTCGGCAAACAA-CTAACCCCGCCTGTTTACCAAAAA  
CATCGCCTCCTGAAACCT----ATAAGAGGTCCAGCCTGCCAGTGACTTA--GTAAAC  
GGCCGCGGTACCCTAACCGTGCAAAGGTAGCACAATCACTTGTTCTTTAAATGAGGACTA  
GTATGAACGGCATCACGAGGGTTACACTGTCTCCCTACTTTAATCAGTGAAACTAATCCC  
CCCGTGAAGAAGCGGGGATAAACATATAAGACGAGAAGACCCCATGGAGCTTTAAACTCA  
GTACCACCTGCCACTAC--TAAACTTATAAACCCAC-GCAG-TATTGTC-TACTGGTTTT  
CGGTTGGGGTGACCACGGAGTAAAACAAATCCTCCACAACGAAAGGAACTAACAACTAA  
TCTAAGAGCCACACCTCTAAGAATCAAT-----AAACTGACTAAA-CTGATCCAATT  
ATTT--GATCAATGAACCAAGTTACCCTGGGGATAACAGCGCAATCCATTTCAAGAGCCC  
ATATCGACAAAATGGGTTTACG-ACC-TCGATGTTGGATCAGGGTATCCAAGTG-GCGCAG  
CCGCTA-CTAA-AGGTTC

>M. annectens MN534746, MN534531, MN534637

TTATTGTCAGCTGTTTATTAACCTACACATGCAAGCATCAACACCCCCGTGAGAACGCC  
CC-TACCTCCACCAGGGTGGGGAGCTGGTATCAGGCACAG-----TT-----TCTGGCCC  
ACAACACCTAGCTTTGCCACACCCCCAAGGGTCATCAGCAGTGATTAACATTGTCCATGA  
GCGCCAGCTCGACTCAGTTAAATAAAAC--AGGGCCGGCCAATCCGGTGCCAGCCGCCGC  
GGCTACACCGTCGGGCTCAAGTTGACAATTATTCGGCGTTAAGCGTGTTTAAAGTGACAA  
ACAATACCTAGAATTAACCTAAACCAAGTTGTGACACACTTGTTTTTAAGAAAGCCATA  
AACGAAAGTTATTCTAGTCAAACCACTTGAATCCACGACAGCTAGGGCACAACTGGGAT  
TAGGTACCCCACTATGCCTAGCCGTAAAATATTTACTTACACCT--AACCCGCCAGGGAA  
TTACGAGCCCAAGCTTAAACCCAAAGGACTTGACGGTGTCCACCCATCTAGAGGAGCC  
TGTTCTATAA-TCGATTC-----



-----  
-----  
-----  
-----TACACACCGCCCGTC  
ACCCTTTTCAAATGTAACATCCCAAG-TTTTAAACAAT-TCAACTACC-ACAGAAGAGGT  
AAGTCGTAACACGGTAAGGGTACTGGAAAGTGGGCTTGGATCAA-CAAAGTGTAGCTTAA  
TCAAA-GCATTTCGCTTACACCGAGAATATGTTTAATAATATCAGATCACCTTGAACGCT  
TAAAACCTAGCTTTACCCCCCCCCGCATGAA--CAC-CCAAAACCTACCCAC--CCACAA  
TAAAACATTTTTCATCATCTAGTAGAAGCGATCAAAAAATGTCTT-AAAGCTATAAAAA-  
TAGTACCGCAAGGGAAAGGTGAAATAAAAAATGAAACAACCTATTAAGCCCCAAAAAGCAGA  
GCTTCAACCTCGTACCTTTTGCATCATGGTTTAGCTAGTCTAACCAAGCAAAACGCACCTT  
TTAGTTTGACATCCCGAAACTGGACGAGCTACTTTGAAACAGCTTTT-AGAGCAAACCCG  
TCTCTGTTGCAAAAGAGTGGGAAGATTTT-TAAGTAGAGGCGATAAACCTACCGAGCCCA  
GAGATAGCTGGTTATTTCAGGAAAAGGATCTAAGTCCTACCTTAAGTT-TCC-CTATA-AC  
CTCAAATATCTTACTAACTTAAGAGCTATTCAAATAAGGTACAGCCTATTTGAACCAGG  
ATACAACCTACCCCG-----AAGCAG  
CCACCTTCCAAAAAAGCGTTAAAGCTTTATTATA--ATTACATTTGAA-TACCCCAT-TC  
TTATCAAAACCTCCAACC--ATACTGAATGACTTCATACCCCTATGAAGGACCATATGC  
TAAAACCTAGTAACAAGAAGA-AGACCTTCTCCA-AAATGTAAGCGTAAGTCATAATGAAC  
AATTCACTGACACTTAACGTCTATGAGCCTACAGTGGCAACCCAC--ATCAAGAAAACCC  
CAC-----TTTTCAT-CACGTTAACCTTACACTAGAACATTTACGGA  
AAGATTAAAAGAGGAAGAAGGAACTCGGCAAACTA-CTAACCCCGCCTGTTTACCAAAAA  
CATCGCCTCCTGACTAACC---ATAGGAGGTCCAGCCTGCCAGTGACCCA--GTTAAAC  
GGCCGCGGTACCCTAACCGTGCAAAGGTAGCACAATCACTTGTTCTTTAAATGAGGACTA  
GTATGAATGGCATCACGAGGGTTATACTGTCTCCCCCTCTAATCAGTGAAACTGATCTC  
CCCGTGAAGAAGCGGGGATATTATTATAAGACGAGAAGACCCCATGGAGCTTTAAACTCA  
GTATCACCTGCCAACCA-CTCCAGCCTATTAACCAC-GCAG-TTCTGAC-TACTAGTTTT  
CGGTTGGGGTGACCGCGGAGTAAAATAAAACCTCCTCGATGAATGGAGCTAACCTCCTTA  
TCCAAGAGCCACAACCTCTAAGAATCAAA-----TCATTGACAAAAATTGATCCAATT  
TATATTGATCAACGAACCAAGTTACCCTGGGGATAACAGCGCAATCTACTTCAAGAGCTC

CTATCGACAAGTGGGTTTACG-ACC-TCGATGTTGGATCAGGGTATCCCAGTG-GCGCAG  
CCGCTA-CTAA-AGGTTC

>M. annectens MN534747, MN534532, MN534638

TTATTGTCAGCTGTTTATTAACCTTACACATGCAAGCATCAACACCCCCGTGAGAACGCC  
CC-TACCTCCACCAGGGTGGGGAGCTGGTATCAGGCACAG-----TT-----TCTGGCCC  
ACAACACCTAGCTTTGCCACACCCCCAAGGGTCATCAGCAGTGATTAACATTGTCCATGA  
GCGCCAGCTCGACTCAGTTAAATAAAAC--AGGGCCGGCCAATCCGGTGCCAGCCGCCGC  
GGCTACACCGTCGGGCTCAAGTTGACAATTATTCGGCGTTAAGCGTGTTTAAAGTGACAA  
ACAATACCTAGAATTAAACTTAAACCAAGTTGTGACACACTTGTTTTTAAGAAAGCCATA  
AACGAAAGTTATCTAGTCAAACCACTTGAATCCACGACAGCTAGGGCACAACTGGGAT  
TAGGTACCCACTATGCCTAGCCGTAAAATATTTACTTACACCT--AACCCGCCAGGGAA  
TTACGAGCCCAAGCTTAAAACCCAAAGGACTTGACGGTGTCCCACCCATCTAGAGGAGCC  
TGTTCTATAA-TCGATTC-----  
-----  
-----  
-----  
-----TACACACCGCCCGTC  
ACCCTTTTCAAATGTAACATCCCAAG-TTTTTAACAAT-TCAACTACC-ACAGAAGAGGT  
AAGTCGTAACACGGTAAGGGTACTGGAAAGTGGGCTTGGATCAA-CAAAGTGTAGCTTAA  
TCAAA-GCATTTCGCTTACACCGAGAATATGTTTAATAATATCAGATCACCTTGAACGCT  
TAAAACCTAGCTTTA-----CAC-CCAAAACCTACCCAC--CCACAA  
TAAAACATTTTTTCATCATCTAGTAGAAGCGATCAAAAAATGTCTT-AAAGCTATAAAAA-  
TAGTACCGCAAGGGAAAGGTGAAATAAAAAATGAAACAACCTATTAAGCCCCAAAAGCAGA  
GCTTCAACCTCGTACCTTTTGCATCATGGTTTAGCTAGTCTAACCAAGCAAACGCACTT  
TTAGTTTGACATCCCGAAACTGGACGAGCTACTTTGAAACAGCTTTT-AGAGCAAACCCG  
TCTCTGTTGCAAAAGAGTGGGAAGATTTC-TAAGTAGAGGCGATAAACCTACCGAGCCCA  
GAGATAGCTGGTTATTCAGGAAAAGGATCTAAGTCTACCTTAAGTT-TCC-CTATA-AC  
CTCAAATATCTTACTAACTTAAAGATCTATTCAAATAAGGTACAGCCTATTTGAACCAGG  
ATACAACCTACCCCG-----AAGCAG  
CCACCTTCAAAAAAGCGTTAAAGCTTTATTATA--ATTACATCTGAA-TACCCCAT-TC



ACCCTCTTCAAATGAAACCCCCACAG-TTTTAACTTC-ATTGCTCACCACAGAAGAGGT  
AAGTCGTAACACGGTAAGCGTACTGGAAAGTGCCTTGGATTAA-CAAAGTGTAGCTTAA  
CCAAA-GCACCTCGCTTACACCGAGAATATGTCTGTTAAACTCAGATCACCTTGAA-GCC  
TAAAACCTAGCTTTAAAACCTCCCCAATACCCCCAC-CCCAATTTTCC--CACAA  
TAAAACATTTTCCATCATTTAGTAAAGGCGATTAAAAAATGTCTT-AAAGCTACAAAAA-  
TAGTACCGCAAGGGAAAGGTGAAATAGAAATGAAACAACCTCTTAAGCCCCAAAAGCAGA  
GCTAAAACCTCGTACCTTTTGCATTATGGTTTAGCCAGTCCAACCAAGCAAATGCACCTT  
TCAGTTTGACCCCCGAAATTAAGCGAGCTACTTCAAACAGCCTTTTAGGGCAAACCCG  
TCTCTGTTGCAAAGAGTGGAAGATTTT-CAAGTAGGGGTGATAAACCTACCGAGCTTA  
AAGATAGCTGGTTATTCAGGAAAAGGATTTTAGTCCTACCTTAAGTTTTTT-----  
-----  
-----  
-----TTTAACTCAA-TACCCCCACC  
CAAACGAAACCTCCATCT--ATACTGAATGACTTCATA-CCCTATGAAGGACCATATGC  
TAAAACCTAGTAACAAGAAGA-AGACCTTCTCCA-AAATGCAAGCGTAAGTCATTATGAAC  
AACTCACTGACACTTAACGTTTTTTGAATCTAAAGTAGTAACTTA---TCAAGAAAATTC  
TAC-----TAGACAT-CACGTCAACCTTACACCAGAGCATTACCGGA  
AAGATTAAAAGAAGGGGAAGGAACTCGGCAAATA--TTAACCCCGCCTGTTTACCAAAAA  
CATCGCCTCCTGACTACTCT--ATAGGAGGTCTAGCCTGCCAGTACTTA--GTAAAC  
GGCCGCGGTACCCTAACCGTGCAAAGGTAGCGCAATCACTTGTTCTTTAAATGAGGACTA  
GTATGAACGGCATCACGAGGGTTACTACTGTCTCCCCCTCTAATCAGTGAAACTGATCTC  
CCCGTGAAGAAGCGGGGATAAACATATAAGACGAGAAGACCCCATGGAGCTTTAAACTCA  
GTATCACCTGCCTTACT-CTATACCCATTTAATCAC-GCAG-TTTTGAA-TACTAGTTTT  
CGGTTGGGGTGACCGCGGAGTAAAACAAAACCTCCTCGATGAACGGAACAATACTCCTAA  
TCCAAGAGCTACAGCTCTAAGAATCAAA-----AAATTGACAAAATTGATCCAAAT  
ATATTTGATCAACGAACCAAGTTACCCTGGGGATAACAGCGCAATCTACTTCAAGAGCTC  
CTATCGACAAGTGGGTTTACG-ACC-TCGATGTTGGATCAGGGTATCCTAGTG-GCGCAG  
CCGCTA-CTAA-AGGTTT

>M. annamensis MN534749, MN534534, MN534640

TTATTATCAACTACTTATCAACTTACACATGCAAGTCTCAGCACCCCTGTGAGAACGCC

TTCAACCTCAACCAGGACAAGGAGCCGGTATCAGGCACAG----AAAA----TCTTGCCC  
ACAACACCTAGCTTTGCCACTCCCCAAGGGTCTCAGCAGTGATTAACATTGTATATGA  
GCGCCAGCTCGACTCAGTTAGATAAAAC--AGAGCCGGCTAATCCGGTGCCAGCCGCCGC  
GGCTACACCGTTGGGCCCAAGTTGACAATCATTCGGCGTTAAGCGTGTTTAAAGTTTTT-  
ACATTTATTATGATTAAACTTAAACCAAGTTGTGACCCACTTGTTTATAAGAAAGCCAGA  
AACGAAAGTTATTTCTAATAAAACCACTTGAACCCACGACAGCTAGGACACAACTGGGAT  
TAGGTACCCCACTATGCCTAGCCGTAAAATATTTACTTACACCA--AACCCGCCCGGG-A  
TTACGAGCTCAAGCTTAAAACCCAAAGGACTTGACGGTGTCCACCCATCTAGAGGAGCC  
TGTTCTATAA-TCGATTCTCCCC-GATACACCTCACCCTTCTAGCCTC--TCAGCCTGT  
ATACCTCCGTCGCAAGCTTACCATATGAACGAA-TCCTAGTGAGCTTAAACAT--CAACC  
ATAAACACGTCAGGTCAAGGTGCAGCCAACGATGTGGGAAGCAATGGGCTACAATTTCTA  
CCAA--TAGAACAAA-CGAAAGACTACATGCAA-CTCGGTCATGAAGGCGGATTTAGCAG  
TAAAAGAAAATAGAGAGTTCTTTTTAATTAGGCACTGGGACGCGTACACACCGCCCGTC  
ACCCTCTTCAAATGAAACCCCCACAG-TTTTTAACTTC-ATTACTCACCACAGAAGAGGT  
AAGTCGTAACACGGTAAGCGTACTGGAAAGTGCCTTGGATTAA-CAAAGTGTAGCTTAA  
CCAAA-GCACCTCGCTTACACCGAGAATATGTCTGTAAACTCAGATCACCTTGAA-GCC  
TAAAACCTAGCTTTAAAACCTCCCCAATACCCCCAC-CCCCAATTTTTCCC---CACAA  
TAAAACATTTTTCCATCATTTTAGTAAAGGCGATTAAAAAATGTCTT-AAAGCTACAAAAA-  
TAGTACCGCAAGGGAAAGGTGAAATAGAAATGAAATAACTCTTAAGCCCCAAAAGCAGA  
GCTAAAACCTCGTACCTTTTTGCATTATGGTTTAGCCAGTCCAACCAAGCAAATGCACTT  
TCAGTTTGACCCCCGAAATTAAGCGAGCTACTTCAAAACAGCCTTTTAGGGCAAACCCG  
TCTCTGTTGCAAAAGAGTGGGAAGATTTT-CAAGTAGTGGTGATAAACCTACCGAGCTTA  
AAGATAGCTGGTTATTCAGGAAAAGGATTTTAGTCCTACCTTAAGTTTTTT-T-----  
-----  
-----  
-----TTTAACTCAA-TACCCCCACC  
CAAACGAAACCTCCATCT--ATACTGAATGACTTCATA-CCCTATGAAGGACCATATGC  
TAAAACCTAGTAACAAGAAGA-AGACCTTCTCCA-AAATGCAAGCGTAAGTCATTATGAAC  
AACTCACTGACACTTAACGTTTTTTGAATCTAAAGTAGTAACTTA----CCGAGAAAATTC  
TAC-----TAAACAT-CACGTCAACCTTACACCAGAGCATTACCGGA

AAGATTA AAAAGAAGGGGAAGGA ACTCGGCAAATA--TTAACCCCGCCTGTTTACCAAAAA  
CATCGCCTCCTGACTACTCT--ATAGGAGGTCTAGCCTGCCAGTGACTTA--GTAAAC  
GGCCGCGGTACCCTAACCGTGCAAAGGTAGCGCAATCACTTGTTCCTTAAATGAGGACTA  
GTATGAACGGCATCACGAGGGTTACTACTGTCTCCCCCTCTAATCAGTGAAACTGATCTC  
CCCGTGAAGAAGCGGGGATAAACATATAAGACGAGAAGACCCCATGGAGCTTTAAACTCA  
GTATCACCTGCCTTACT-CTATACCCACTTAATCAC-GCAG-TTTTGAA-TACTAGTTTT  
CGGTTGGGGTGACCGCGGAGTAAACAAAACCTCCTCGATGAATGGAATAATACTCCTAA  
TCCAAGAGCTACAGCTCTAAGAATCAA-----AAATTGACAAAAATTGATCCACAT  
ATATTTGATCAACGAACCAAGTTACCCTGGGAGAACACGCAATCTACTTCAAGAGCTC  
CTATCGACAAATGGGTTTACG-ACC-TCGATGTTGGATCAGGGTATCCTAGTG-GCGCAG  
CCGCTA-CTAA-AGGTTT

>M. marmorata MN534750, MN534535, MN534641

TTATTGTCAACTATTTATCAACTTACACATGCAAGTCTCAGCATCCCTGTGAGAACGCC  
TTTTACCTCATCAAGGAAAAGGAGCTGGTATCAGGCACAG-----TA-----TCTCGCCC  
ACAACACCTAGCTTTGCCACACCCCCAAGGGTACTCAGCAGTGATTAACATTGATTATGA  
GCGCCAGCTCGACTCAGTTAGATAAAAT--AGAGCCGGCTAATCCGGTGCCAGCCGCCGC  
GGCTACACCATCAGGCCCAAGCTGACAATCATTCGGCGTTAAGCGTGTTTAAAGTGTTC  
CCCTATATTAGAATTAACCTTAAACCAAGTCGTGACACACTTGTTTTATAAGAAAGCCTCA  
AACGAAAGTTATTCTAACCAACCCTTGAATCCACGACAGCTAGGACACAAACTGGGAT  
TAGGTACCCACTATGCCTAGCCGTAAAAATTTACTTACACCA--AACCCGCCGGGGAA  
TTACGAGCTCAAGCTTAAAACCCAAAGGACTTGACGGTGTCCCACCCATCTAGAGGAGCC  
TGTCTATAA-TCGATTCTCCCC-GATATACCTCACCATATCTAGCCTT--TCAGCCTGT  
ATACCTCCGTCGCAAGCTTACCATATGAACGCA-TCCTAGTGAGCTTAAATAT--ATATC  
ATAAATACGTCAGGTCAAGGTGCAGCCAACGTCATGGAAAGTAATGGGCTACAATTTCTA  
CCA---TAGAACAAA-CGAAAGACTACATGCAA-CTTAGTCATGAAGCGGATTTAGCAG  
TAAAAGAAAATAGAGAGTTCTTTTTAATTAGGCACTGGGACGCGTACACACCCGCCGTC  
ACCCTCTCAAATGAACTACTAAAG-TTCTTAACAAT-ATTATTCACCACAGAAGAGGT  
AAGTCGTAACACGGTAAGCGTACTGGAAAGTGTGCTTGGATTAA-CAAAGTGTAGCTTAA  
CTAAA-GCGTCTCGCTTACACCGAGAATATGTCTGTAAACCCTGATCACCTTGAACGCC  
TAAAACCTAGCTTTAAAACTCA---TATGTAACCTCC-TTTAACTCTTTGAC---ACCAA

TAAAACATTTTTTCATTACTTAGTAGAGGCGATCAAAAAATATCTT-AAAGCTACAAAAA-  
TAGTACCGCAAGGGAAAGGTGAAATAGAAATGAAACAATTTTTAAGCTATAAGAAGCAGA  
GTTTTAATCTCGTACCTTTTGCATCATGGTTTAGCTAGTCTAACCAAGCAAAACGCATTT  
TAAGTTTGACCCCCGAAATTAAGCGAGCTACTTCAAACAGCCTTTTAGGGCAAACCCG  
TCTCTGTTGCAAAAGAGTGGAAGATTTT-CAAGTAGGGGTGATAAACCTACCGAGCTTA  
AAGATAGCTGGTTATTCAGGAAAAGGATTTTAGTCCTACCTTAAGTTTTTTT--TATAACT  
TCTAATATTTATTATAAACTTAAGAGCTATTCAAATAAGGTACAGCCTATTTGAATTAGG  
GTACAACCTCCTACG-----  
-----TATTATACTTTTTTAACTAA-TTTCTACC-CC  
CTAACGAAACCCTCCAACC--ATACTGAATGACTTCATA-TTATATGAAGAACCATATGC  
TAAACTAGTAACAAGAAGA-AGACCTTCTCTA-AAATGCAAGCGTAAGTCATAATGAAC  
AACTCACTGACACTTAACGTTTATGAACACTAAATAGCAACTCA----TCAAGAAAATAC  
TAT-----TTAACCA-CACGTCAACCTTACACTAGAGCATTTCCAGA  
AAGATTAAGAAGTGAAGGAACTCGGCAAACA--TTAACCTCGCCTGTTTACCAAAAA  
CATCGCCTCCTGACTAACT--ATAGGAGGTCCAGCCTGCCAGTGACCAA--GTAAAC  
GGCCGCGGTACCCTAACCGTGCAAAGGTAGCGCAATCACTTGTTCTTTAAATGAGGACTA  
GTATGAACGGCATCACGAGGGTTATACTGTCTCCCCCTCTAATCAGTGAAACTGATCTC  
CCCGTGAAGAAGCGGGGATAAACTTATAAGACGAGAAGACCCCATGGAGCTTTAAACTCA  
GTATCACCTGCCTCCTA-CCACAACCTATTAATTAT-GCAG-TTTTGAT-TACTAGTTTT  
CGGTTGGGGTGACCGCGGAGTAAAACAAAACCTCCTCGATGAACGGAACCTATCCTCCTTA  
TCCAAGAGTTACAACCTCTAAGAATCAAT-----AAATTGACAAAAATGATCCAAAT  
AATTTTGATCAACGAACCAAGTTACCCTGGGGATAACAGCGCAATCTACTTCAAGAGCTC  
CTATCGACAAGTGGGTTTACG-ACC-TCGATGTTGGATCAGGGTATCCCAGTG-GCGCAG  
CCGCTA-CTAA-AGGTTT

>M. marmorata MN534751, MN534536, MN534642

TTATTGTCAACTATTTATCAACTTACACATGCAAGTCTCAGCATCCCTGTGAGAACGCC  
TTTTACCTCATCAAGGAAAAGGAGCTGGTATCAGGCACAG-----TA-----TCTCGCCC  
ACAACACCTAGCTTTGCCACACCCCCAAGGGTACTCAGCAGTGATTAACATTGATTATGA  
GCGCCAGCTCGACTCAGTTAGATAAAAT--AGAGCCGGCTAATCCGGTGCCAGCCGCCGC  
GGCTACACCATCAGGCCCAAGCTGACAATCATTGGCGTTAAGCGTGTTTAAAGTGTTC

CCCCACATTAGAATTAACCTTAAACCAAGTCGTGACACACTTGTTTATAAGAAAGCCTCA  
AACGAAAGTTATTCTAACCAAACCACTTGAATCCACGACAGCTAGGACACAAACTGGGAT  
TAGGTACCCCACTATGCCTAGCCGTAAAATATTTACTTACACCA--AACCCGCCCGGGAA  
TTACGAGCTCAAGCTTAAACCCAAAGGACTTGACGGTGTCCCACCCATCTAGAGGAGCC  
TGTTCTATAA-TCGATTCTCCCC-GATATACCTCACCATATCTAGCCTT--TCAGCCTGT  
ATACCTCCGTCGCAAGCTTACCATATGAACGCA-TCCTAGTGAGCTTAAATAT--ATATC  
ATAAATACGTCAGGTCAAGGTGCAGCCAACGTCATGGAAAGTAATGGGCTACAATTTCTA  
CCA---TAGAACAAA-CGAAAGACTACATGCAA-CTTAGTCATGAAGGCGGATTTAGCAG  
TAAAAAGAAAATAGAGAGTTC'TTTTTAATTAGGCACTGGGACGCGTACACACCCGCCCGTC  
ACCCTCTTCAAATGAACTACTAAAG-TTCTTAAACAAT-ATTATTCACCACAGAAGAGGT  
AAGTCGTAACACGGTAAGCGTACTGGAAAGTGTGCTTGGATTAA-CAAAGTGTAGCTTAA  
CTAAA-GCGTCTCGCTTACACCGAGAATATGTCTGTAAACCCTGATCACCTTGAACGCC  
TAAAACCTAGCTTTAAAACTTA---TATATAACTCC-TTTAACTCTTTGAC---ACCAA  
TAAAACATTTTTCATTACTTAGTAGAGGCGATCAAAAAATATCTT-AAAGCTACAAAAA-  
TAGTACCGCAAGGGAAAGGTGAAATAGAAATGAAACAATTTTTAAGCTATAAGAAGCAGA  
GTTTTAATCTCGTACCTTTTGCATCATGGTTTAGCTAGTCTAACCAAGCAAACGCATTT  
TAAGTTTGACCCCCGAAATTAAGCGAGCTACTTCAAAACAGCCTTTTAGGGCAAACCCG  
TCTCTGTTGCAAAAGAGTGGGAAGATTTTTCAAGTAGGGGTGATAAACCTACCGAGCTTA  
AAGATAGCTGGTTATTCAGGAAAAGGATTTTAGTCCTACCTTAAGTTTTTTT-TTATAACT  
TCTAATATTTAT-----  
-----AAAGCAG  
CCATCTTTC-AAAAAGCGTTAAAGCTTTATTATACTTTTTTAAACCTAA-TTTCTACC-CC  
CTAACGAAACCCTCCAACC--ATACTGAATGACTTCAT--TTATATGAAGAACCATATGC  
TAAAACCTAGTAACAAGAAGA-AGACCTTCTCTA-AAATGCAAGCGTAAGTCATAATGAAC  
AACTCACTGACACTTAACGTTTATGAACACTAAATAGCAACTCA----CCAAGAAAATAC  
TAT-----TTAACCA-CACGTCAACCTTACACTAGAGCATTTCCAGA  
AAGATTAAAAGAAGTGGAAAGGAACCTCGGCAAACA--TTAACCTCGCCTGTTTACCAAAAA  
CATCGCCTCCTGACTAACT---ATAGGAGGTCCAGCCTGCCAGTGACCAA--GTAAAC  
GGCCGCGGTACCCTAACCGTGCAAAGGTAGCGCAATCACTTGTTCTTTAAATGAGGACTA  
GTATGAACGGCATCACGAGGGTTATACTGTCTCCCCCTCTAATCAGTGAAACTGATCTC



CCCGTGAAGAAGCGGGGATAAACTTATAAGACGAGAAGACCCCATGGAGCTTTAAACTCA  
GTATCACCTGCCTCCCA-CCACAACCTATTAATTAT-GCAG-TTTTGAT-TACTAGTTTT  
CGGTTGGGGTGACCGCGGAGTAAAACAAAACCTCCTCGATGAACGGAACCTATCCTCCTTA  
TCCAAGAGTTACAACCTAAGAATCAAT-----AAATTGACAAAAATTGATCCAAAT  
AATTTTGATCAACGAACCAAGTTACCCTGGGGATAACAGCGCAATCTACTTCAAGAGCTC  
CTATCGACAAGTGGGTTTACG-ACC-TCGATGTTGGATCAGGGTATCCCAGTG-GCGCAG  
CCGCTA-CTAA-AGGTTT

>M. marmorata MN534752, MN534537, MN534643

TTATTGTCAACTATTTATCAACTTACACATGCAAGTCTCAGCATCCCTGTGAGAACGCC  
TTTTACCTCAACAAGGAAAAGGAGCTGGTATCAGGCACAG-----TA-----TCTCGCCC  
ACAACACCTAGCTTTGCCACACCCCCAAGGGTACTCAGCAGTGATTAACATTGATTATGA  
GCGCCAGCTCGACTCAGTTAGATAAAAT--AGAGCCGGCTAATCCGGTGCCAGCCGCCGC  
GGCTACACCATCAGGCCCAAGCTGACAATCATTCCGGCGTTAAGCGTGTTTAAAGTGCTTC  
CCCCATATTAGAATTAACTTAAACCAAGTCGTGACACACTTGTTTATAAGAAAGCCTCA  
AACGAAAGTTATTCTAACCAAACCACTTGAATCCACGACAGCTAGGACACAACTGGGAT  
TAGGTACCCCACTATGCCTAGCCGTAAAATATTTACTTACACCA--AACCCGCCGGGGAA  
TTACGAGCTCAAGCTTAAAACCAAGGACTTGACGGTGTCCCACCCATCTAGAGGAGCC  
TGTTCTATAA-TCGATTCTCCCC-GATATACCTCACCATATCTAGCCTT--TCAGCCTGT  
ATACCTCCGTCGCAAGCTTACCATATGAACGCA-TCCTAGTGAGCTTAAATAT--ATATC  
ATAAATACGTCAGGTCAAGGTGCAGCCAACGTCATGGAAAGTAATGGGCTACAATTTCTA  
CCA---TAGAACAAA-CGAAAGACTACATGCAA-CTTAGTCATGAAGGCGGATTTAGCAG  
TAAAAGAAAAATAGAGAGTTCTTTTTAATTAGGCACTGGGACGCGTACACACCCGCCCGTC  
ACCCTCTTCAAATGAACTACTGAAG-TCCTTAACAAT-ATTATTCACCACAGAAGAGGT  
AAGTCGTAACACGGTAAGCGTACTGGAAAGTGTGCTTGGATTAA-CAAAGTGTAGCTTAA  
CTAAA-GCGTCTCGCTTACACCGAGAATATGTCTGTAAACCCTGATCACCTTGAACGCC  
TAAAACCTAGCTTTAAAACTCA---TATGTAACCCC-TTAACTCTTTGAC---ACCAA  
TAAAACATTTTTTCACTTACTTAGTAGAGGCGATCAAAAAATATCTT-AAAGCTACAAAAA-  
TAGTACCGCAAGGGAAAGGTGAAATAGAAATGAAACAATTTTTAAGCCGTAAGAAGCAGA  
GTTTTAATCTCGTACCTTTTGCATCATGGTTTAGCTAGTCTAACCAAGCAAACGCATTT  
TAAGTTTGACCCCCGAAATTAAGCGAGCTACTTCAAACAGCCTTTTAGGGCAAACCCG

TCTCTGTTGCAAAAGAGTGGGAAGATTTTTCAAGTAGAGGTGATAAACCTACCGAGCTTA  
AAGATAGCTGGTTATTCAGGAAAAGGATTTTAGTCCTACCTTAAGTTTCTT--TATAACT  
TCTAATATTTAT-----  
-----AAAGCAG  
CCATCTTTC-AAAAAGCGTTAAAGCTTTATTATACTTTTTTAAACATAA-TTTCTACC-CC  
CTAACGAAACCCTCCAACC--ATACTGAATGACTTCATA-TTATATGAAGAACCATATGC  
TAAACTAGTAACAAGAAGA-AGACCTTCTCTA-AAATGCAAGCGTAAGTCATAATGAAC  
AACTCACTGACACTTAACGTTTATGAACACTAAATAGCAACTCA----TCAAGAAAATAC  
TAT-----TTAACCA-TACGTCAACCTTACACCAGAGCATTTCAGA  
AAGATTAAGAAGTGAAGGAACCTCGGCAAACA--TTAACCTCGCCTGTTTACCAAAAA  
CATCGCCTCCTGACTAACT--ATAGGAGGTCCAGCCTGCCAGTGACCAA--GTAAAC  
GGCCGCGGTACCCTAACCGTGCAAAGGTAGCGCAATCACTTGTTCTTTAAATGAGGACTA  
GTATGAACGGCATCACGAGGGTTATACTGTCTCCCCCTCTAATCAGTGAAACTGATCTC  
CCCGTGAAGAAGCGGGGATAAGCTTATAAGACGAGAAGACCCCATGGAGCTTTAAACTCA  
GTATCACCTGCCTCCTG-CCACAACCTATTAATTAT-GCAG-TTTTGGT-TACTAGTTTT  
CGGTTGGGGTGACCGCGGAGTAAACAAAACCTCCTCGATGAACGGAGCTATCCTCCTTA  
TCCAAGAGTTACAACCTAAGAATTAAT-----AAATTGACAAAAATTGATCCAAAT  
AATTTTGATCAACGAACCAAGTTACCCTGGGGATAACAGCGCAATCTACTTCAAGAGCTC  
CTATCGACAAGTGGGTTTACG-ACC-TCGATGTTGGATCAGGGTATCCCAGTG-GCGCAG  
CCGCTA-CTAA-AGGTTT

>M. marmorata MN534753, MN534538, MN534644

TTATTGTCAACTATTTATCAACTTACACATGCAAGTCTCAGCATCCCTGTGAGAACGCC  
TTTTACCTCATCAAGGAAAAGGAGCTGGTATCAGGCACAG-----TA-----TCTCGCCC  
ACAACACCTAGCTTTGCCACACCCCCAAGGGTACTCAGCAGTGATTAACATTGATTATGA  
GCGCCAGCTCGACTCAGTTAGATAAAAT--AGAGCCGGCTAATCCGGTGCCAGCCGCCGC  
GGCTACACCATCAGGCCCAAGCTGACAATCATTCGGCGTTAAGCGTGTTTAAAGTGTTC  
CCCTATATTAGAATTAACCTTAAACCAAGTCGTGACACACTTGTTTATAAGAAAGCCTCA  
AACGAAAGTTATTTCTAACCAACCACTTGAATCCACGACAGCTAGGACACAAACTGGGAT  
TAGGTACCCCACTATGCCTAGCCGTAAAATATTTACTTACACCA--AACCCGCCGGGGAA  
TTACGAGCTCAAGCTTAAACCCAAAGGACTTGACGGTGTCCCACCCATCTAGAGGAGCC

TGTTCTATAA-TCGATTCTCCCC-GATATACCTCACCATATCTAGCCTT--TCAGCCTGT  
ATACCTCCGTCGCAAGCTTACCATATGAACGCA-TCCTAGTGAGCTTAAATAT--ATATC  
ATAAATACGTCAGGTCAAGGTGCAGCCAACGTCATGGAAAGTAATGGGCTACAATTTCTA  
CCA---TAGAACAAA-CGAAAGACTACATGCAA-CTTAGTCATGAAGGCGGATTTAGCAG  
TAAAAAGAAAATAGAGAGTTCTTTTTAATTAGGCACTGGGACGCGTACACACCGCCCGTC  
ACCCTCTTCAAATGAACTACTAAAG-TTCTTAACAAT-ATTATTCACCACAGAAGAGGT  
AAGTCGTAACACGGTAAGCGTACTGGAAAGTGTGCTTGGATTAA-CAAAGTGTAGCTTAA  
CTAAA-GCGTCTCGCTTACACCGAGAATATGTCTGTAAACCCTGATCACCTTGAACGCC  
TAAAACCTAGCTTTAAAAACTCA---TATGTAACCTCC-TTTAACTCTTTGAC---ACCAA  
TAAAACATTTTTTCATTACTTAGTAGAGGCGATCAAAAAATATCTT-AAAGCTACAAAAA-  
TAGTACCGCAAGGGAAAGGTGAAATAGAAATGAAACAATTTTTAAGCTATAAGAAGCAGA  
GTTTTAATCTCGTACCTTTTGCATCATGGTTTAGCTAGTCTAACCAAGCAAACGCATTT  
TAAGTTTGACCCCCGAAATTAAGCGAGCTACTTCAAAACAGCCTTTTAGGGCAAACCCG  
TCTCTGTTGCAAAGAGTGGGAAGATTTT-CAAGTAGAGGTGATAAACCTACCGAGCTTA  
AAGATAGCTGGTTATTCAGGAAAAGGATTTTAGTCCTACCTTAAGTTTTTT-TTATAACT  
TCTAATATTTAT-----  
-----AAAGCAG  
CCATCTTTCAAAAAAGCGTTAAAGCTTTTATTATACTTTTTTAACTAA-TTCTTACC-CC  
CTAACGAAACCCTCCAACC--ATACTGAATGACTTCATA-TTATATGAAGAACCATATGC  
TAAAACCTAGTAACAAGAAGA-AGACCTTCTCTA-AAATGCAAGCGTAAGTCATAATGAAC  
AACTCACTGACACTTAAACGTTTATGAACACTAAATAGCAACTCA----TCAAGAAAATAC  
TAT-----TTAACCA-CACGTCAACCTTACACTAGAGCATTTCCAGA  
AAGATTAAGAAGTGGAAAGGAACCTCGGCAAACA--TTAACCTCGCCTGTTTACCAAAAA  
CATCGCCTCCTGACTAACT---ATAGGAGGTCCAGCCTGCCAGTGACCAA--GTTAAAC  
GGCCGCGGTACCCTAACCGTGCAAAGGTAGCGCAATCACTTGTTCTTTAAATGAGGACTA  
GTATGAACGGCATCACGAGGGTTATACTGTCTCCCCCTCTAATCAGTGAAACTGATCTC  
CCCGTGAAGAAGCGGGGATAAACTTATAAGACGAGAAGACCCCATGGAGCTTTAAACTCA  
GTATCACCTGCCTCCTA-TCACAACCTATTAATTAT-GCAG-TTTTGAT-TACTAGTTTT  
CGGTTGGGGTGACCGCGGAGTAAAACAAAACCTCCTCGATGAACGGAACCTATCCTCCTTA  
TCCAAGAGTTACAACCTAAGAATCAAT-----AAATTGACAAAAATTGATCCAAT



CCATCTTTC-AAAAAGCGTTAAAGCTTTATTATACTTTTTTAAACCTAA-TTTCTACC-CC  
CTAACGAAACCCTCCAACC--ATACTGAATGACTTCATA-TTATATGAAGAACCATATGC  
TAAACTAGTAACAAGAAGA-AGACCTTCTCTA-AAATGCAAGCGTAAGTCATAATGAAC  
AACTCACTGACACTTAACGTTTATGAACACTAAATAGCAACTCA----TCAAGAAAATAC  
TAT-----TTAACCA-CACGTCAACCTTACACTAGAGCATTTCAGGA  
AAGATTAAGAAGTGAAGGAACTCGGCAAACA--TTAACCTCGCCTGTTTACCAAAAA  
CATCGCCTCCTGACTAACT---ATAGGAGGTCCAGCCTGCCAGTGACCAA--GTAAAC  
GGCCGCGGTACCCTAACCGTGCAAAGGTAGCGCAATCACTTGTTCTTTAAATGAGGACTA  
GTATGAACGGCATCACGAGGGTTATACTGTCTCCCCCTCTAATCAGTGAAACTGATCTC  
CCCGTGAAGAAGCGGGATAAACTTATAAGACGAGAAGACCCCATGGAGCTTTAAACTCA  
GTATCACCTGCCTCCTA-CCACAACCTATTAATTAT-GCAG-TTTTGGT-TACTAGTTTT  
CGGTTGGGGTGACCGCGGAGTAAACAAAACCTCCTCGATGAACGGAACCTATCCTCCTTA  
TCCAAGAGTTACAACCTAAGAATCAAT-----AAATTGACAAAAATTGATCCAAT  
AATTTTGATCAACGAACCAAGTTACCCTGGGGATAACAGCGCAATCTACTTCAAGAGCTC  
CTATCGACAAGTGGGTTTACG-ACC-TCGATGTTGGATCAGGGTATCCCAGTG-GCGCAG  
CCGCTA-CTAA-AGGTTC

>M. pulverata MN534755, MN534539, MN534646

TTATTGTCAACTATTTATCAACTTACACATGCAAGTCTCAGCATCCCTGTGAGAACGCC  
TTTTACCTCATCAAGGAAAAGGAGCTGGTATCAGGCACAG-----TA-----TCTCGCCC  
ACAACACCTAGCTTTGCCACACCCCCAAGGGTACTCAGCAGTGATTAACATTGATTATGA  
GCGCCAGCTCGACTCAGTTAGATAAAAT--AGAGCCGGCTAATCCGGTGCCAGCCGCCGC  
GGCTACACCATCAGGCCCAAGCTGACAATCATTCGGCGTTAAGCGTGTTTAAAGTGTTC  
CCCTATATTAGAATTAACCTTAAACCAAGTCGTGACACACTTGTTTATAAGAAAGCCTCA  
AACGAAAGTTATTCTAACCAACCACTTGAATCCACGACAGCTAGGACACAAACTGGGAT  
TAGGTACCCACTATGCCTAGCCGTAAAATATTTACTTACACCA--AACCCGCCGGGGAA  
TTACGAGCTCAAGCTTAAACCCAAAGGACTTGACGGTGTCCACCCATCTAGAGGAGCC  
TGTTCTATAA-TCGATTCTCCCC-GATATACCTCACCATATCTAGCCTT--TCAGCCTGT  
ATACCTCCGTGCAAGCTTACCATATGAACGCA-TCCTAGTGAGCTTAAATAT--ATATC  
ATAAATACGTCAGGTCAAGGTGCAGCCAACGTCATGGAAAGTAATGGGCTACAATTTCTA  
CCA---TAGAACAAA-CGAAAGACTACATGCAA-CTTAGTCATGAAGGCGGATTTAGCAG

TAAAAAGAAAATAGAGAGTTCTTTTTTAATTAGGCACTGGGACGCGTACACACCGCCCGTC  
ACCCTCTTCAAATGAACTACTAAAG-TTCTTAACAAT-ATTATTCACCACAGAAGAGGT  
AAGTCGTAACACGGTAAGCGTACTGGAAAGTGTGCTTGGATTAA-CAAAGTGTAGCTTAA  
CTAAA-GCGTCTCGCTTACACCGAGAATATGTCTGTAAACCCTGATCACCTTGAACGCC  
TAAAACCTAGCTTTAAAAACTCA---TATGTAACTCC-TTTAACTCTTTGAC---ACCAA  
TAAAACATTTTTTCATTACTTAGTAGAGGCGATCAAAAAATATCTTTAAAGCTACAAAAA-  
TAGTACCGCAAGGGAAAGGTGAAATAGAAATGAAACAATTTTTAAGCTATAAGAAGCAGA  
GTTTTAACCTCGTACCTTTTGCATCATGGTTTAGCTAGTCTAACCAAGCAAAACGCATTT  
TAAGTTTGACCCCCGAAATTAAGCGAGCTACTTCAAAACAGCCTTTTAGGGCAAACCCG  
TCTCTGTTGCAAAAGAGTGGGAAGATTTT-CAAGTAGGGGTGATAAACCTACCGAGCTTA  
AAGATAGCTGGTTATTCAGGAAAAGGATTTTAGTCCTACCTTAAGTTTTTT--TATAACT  
TCTAATATTTATCATAAACTTAAGAGCTATTCAAATAAGGTACAGCCTATTTGAATTAGG  
GTACAACCTCCTACG-----AAAGCAG  
CCATCTTTC-AAAAAGCGTTAAAGCTTTATGTACTTTTT-AACCTAA-TTTCTACC-CC  
CTAACGAAACCTCCAACC--ATACTGAATGACTTCATA-TTATATGAAGAACCATATGC  
TAAAACCTAGTAACAAGAAGA-AGACCTTCTCTA-AAATGCAAGCGTAAGTCATAATGAAC  
AACTCACTGACACTTAACGTTTATGAACACTAAATAGCAACTCA----TCAAGAAAATAC  
TAT-----TTAACCA-CACGTCAACCTTACACTAGAGCATTTCCAGA  
AAGATTAAGAAGCGGAAGGAAGGAACTCGGCAAACA--TTAACCTCGCCTGTTTACCAAAAA  
CATCGCCTCCTGACTAACT--ATAGGAGGTCCAGCCTGCCAGTGACCAA--GTTAAAC  
GGCCGCGGTACCCTAACCGTGCAAAGGTAGCGCAATCACTTGTTCTTTAAATGAGGACTA  
GTATGAACGGCATCACGAGGGTTATACTGTCTCCCCCTCTAATCAGTGAAACTGATCTC  
CCCGTGAAGAAGCGGGGATAAACTTATAAGACGAGAAGACCCCATGGAGCTTTAAACTCA  
GTATCACCTGCCTCCTA-CCACAACCTATTAATTAT-GCAG-TTTTGAT-TACTAGTTTT  
CGGTTGGGGTGACCGCGGAGTAAAACAAAACCTCCTCGATGAACGGAACCTATCCTCCTTA  
TCCAAGAGTTACAACCTAAGAATCAAT-----AAATTGACAAAATTGATCCAAAT  
AATTTTGATCAACGAACCAAGTTACCCTGGGGATAACAGCGCAATCTACTTCAAGAGCTC  
CTATCGACAAGTGGGTTTACG-ACC-TCGATGTTGGATCAGGGTATCCAGTG-GCGCAG  
CCGCTA-CTAA-AGTTTC

>M. pulverata MN534756, MN534540, MN534647

TTATTGTCAACTATTTATCAACTTACACATGCAAGTCTCAGCATCCCTGTGAGAACGCC  
TTTTACCTCATTAAAGGAAAAGGAGCTGGTATCAGGCACAG-----TA-----TCTCGCCC  
ACAACACCTAGCTTTGCCACACCCCCAAGGGTACTCAGCAGTGATTAACATTGATTATGA  
GCGCCAGCTCGACTCAGTTAGATAAAAT--AGAGCCGGCTAATCCGGTGCCAGCCGCCGC  
GGCTACACCATCAGGCCAAGCTGACAATCATTGGCGTTAAGCGTGTTTAAAGTGTTC  
CCCTATATTAGAATTAACCTTAAACCAAGTCGTGACACACTTGTTTATAAGAAAGCCTCA  
AACGAAAGTTATTCTAACCAAACCACTTGAATCCACGACAGCTAGGACACAAACTGGGAT  
TAGGTACCCCACTATGCCTAGCCGTAAAATATTTACTTACACCA--AACCCGCCGGGGAA  
TTACGAGCTCAAGCTTAAAACCAAAGGACTTGACGGTGTCCACCCATCTAGAGGAGCC  
TGTTCTATAA--TCGATTCTCCCC--GATATACCTCACCATATCTAGCCTT--TCAGCCTGT  
ATACCTCCGTCGCAAGCTTACCATATGAACGCA--TCCTAGTGAGCTTAAATAT--ATATC  
ATAAATACGTCAGGTCAAGGTGCAGCCAACGTCATGGAAAGTAATGGGCTACAATTTCTA  
CCA--TAGAACAAA--CGAAAGACTACATGCAA--CTTAGTCATGAAGGCGGATTTAGCAG  
TAAAAGAAAATAGAGAGTTCTTTTTAATTAGGCACTGGGACGCGTACACACCGCCCGTC  
ACCCTCTTCAAATGAACTACTAAAG--TCTTAAACAAT--ATTATTCACCACAGAAGAGGT  
AAGTCGTAACACGGTAAGCGTACTGGAAAGTGTGCTTGGATTAA--CAAAGTGTAGCTTAA  
CTAAA--GCGTCTCGCTTACACCGAGAATATGTCTGTAAACCCTGATCACCTTGAACGCC  
TAAAACCTAGCTTTAAAAACTCA--TATGTAACCTCC--TTTAACTCTTTGAC--ACCAA  
TAAAACATTTTTTCATTACTTAGTAGAGGCGATCAAAAAATATCTT--AAAGCTACAAAAA--  
TAGTACCGCAAGGGAAAGGTGAAATAGAAATGAAACAATTTTTAAGCTATAAGAAGCAGA  
GCTTTAATCTCGTACCTTTTGCATCATGGTTTAGCTAGTCTAACCAAGCAAACGCATTT  
TAAGTTTGACCCCCGAAATTAAGCGAGCTACTTCAAAACAGCCTTTTAGGGCAAACCCG  
TCTCTGTTGCAAAAGAGTGGGAAGATTTT--CAAGTAGGGGTGATAAACCTACCGAGCTTA  
AAGATAGCTGGTTATTCAGGAAAAGGATTTTAGTCCTACCTTAAGTTTTTT--TATAACT  
TCTAATATTTATTATAAACTTAAAGAGCTATTCAAATAAGGTACAGCCTATTTGAATTAGG  
GTACAACCTCCTACGACG-----AAAGCAG  
CCATCTTTC--AAAAGCGTTAAAGCTTTATTATACTTTTT--AACCTAA--TTTCTACC--CC  
CTAACGAAACCCTCCAACC--ATACTGAATGACTTCATA--TTATATGAAGAACCATATGC  
TAAAACCTAGTAACAAGAAGA--AGACCTTCTCTA--AAATGCAAGCGTAAGTCATAATGAAC  
AACTCACTGACACTTAAACGTTTATGAACACTAAATAGCAACTCA----TCAAGAAAATAC

TAT-----TTAACCA-CACGTCAACCTTACACTAGAGCATTTCAGAA  
AAGATTAAGAAGTGGAAAGGAAGCTCGGCAAACA--TTAACCTCGCCTGTTTACCAAAAA  
CATCGCCTCCTGACTAACT---ATAGGAGGTCCAGCCTGCCAGTGACCAA--GTTAAAC  
GGCCGCGGTACCCTAACCGTGCAAAGGTAGCGCAATCACTTGTCTTTAAATGAGGACTA  
GTATGAACGGCATCACGAGGGTTATACTGTCTCCCCCTCTAATCAGTGAAACTGATCTC  
CCCGTGAAGAAGCGGGGATAAACTTATAAGACGAGAAGACCCCATGGAGCTTTAAACTCA  
GTATCACCTGCCTCCTA-CCACAACCTATTAATTAT-GCAG-TTTTGAT-TACTAGTTTT  
CGGTTGGGGTGACCGCGGAGTAAACAAAACCTCCTCGATGAACGGAACCTATCCTCCTTA  
TCCAAGAGTTACAACCTAAGAATCAAT-----AAATTGACAAAAATTGATCCAAAT  
AATTTTGATCAACGAACCAAGTTACCCTGGGGATAACAGCGCAATCTACTTCAAGAGCTC  
CTATCGACAAGTGGGTTTACG-ACC-TCGATGTTGGATCAGGGTATCCAGTG-GCGCAG  
CCGCTA-CTAA-AGGTTC

>M. nanapollexa MN534757, MN534541, MN534648

TTATTGTGCTAGCTACTTATCTACCTACACATGCAAGTCTCAGCACCCCTGTGAGAACGCC  
TTTTACCTACACCAGGAAAAGGAGCCGGTATCAGGCACAA-----TA-----TCTTGCCC  
AAGACACCTAGCTTTGCCACACCCTCAAGGGTATTGAGCAGTGATTAACATTGTTTCATAA  
GCGCCAGCTTGACTCAGTTAAATAAAAT--AGAGCCGGCTAATCCGGTGCCAGCCGCCGC  
GGCTACACCGCTAGGCCCAAGTTGACAATTACTCGGCGTTAAGAGTGTTTTAAGTGCCC-  
TAAACCATTAGAATTAAACTTTAACCAAGTTGTGACACACTTGTCTTAAAAAAAACATA  
AACGAAAGTTATTCTAATTTGACCCTTGAACCCACGACAGCTAAGACACAACTGGGAT  
TAGGTACCCACTATGCCTAGCCGTAAAAATTAACCTTACACCT--CATTCGCCAGGGAA  
TTACGAGCGCAAGCTTAAAACCAAAGGACTTGACGGTGTCCCACCCACCTAGAGGAGCC  
TG---TATAA-TCGATTTTCCCCGATTCACCTCACCCTTCTAGCCAC--TCAGCCTGT  
ATACCTCCGTCGTAAGCTTACCATATGAACGCATACTTAGTGAGCCTAAAGAT--TTACC  
ATAAACACGTCAGGTCAAGGTGCAGCCACGATGTGGAAAGCAATGGGCTACAATTTCTA  
TAC---TAGAACAAA-CGAAAGACTACATGAAA-CTCAGTCATGAAGCGGATTTAGCAG  
TAAAAGAAAATAGAGTGTCTTTTTTAACAAGGCCCTGGGACGCGTACACACCGCCCGTC  
ACCCTCTTCAAATGTACATA--ACAG-TTTTTAACTAC-ACTTTACTCTACAGAAGAGGT  
AAGTCGTAACACGGTAAGCGTACTGGAAAGTGCCTTGGATTAA-CAAAGTGTAGCTTAA  
TTAAA-GCATCTCGCTTACACCGAGAATATGTCTACTTACTACAGACCACCTTGAACGCC



AAAAACCTAGCTTTATTTTCTCT---TATGCA-CTAC-TGTAATTTTACTAT---AAAAA  
TAAACATTTTTTAATTATTTAGTAGAAGTGATCAAAAAATATTTCTAAAGCTATAAAAA-  
TAGTACCGCAAGGGAAAGGTGAAATAACAATGAAATAATTTTTAAGCACAAAAAAGCAGA  
GCTTAAATCTCGTACCTTTTGCATCATGGTTTAATTAGTCTAACCAAGCAAATGAATTT  
TTAGTTTGACCCCCGAAACTAAGCGAGCTACTTTGAAACAGCCCTA-AGAGCCAACCCA  
TCTCTGTTGCAAAAGAGTGGGAAGATTTT-TAAGTAGAGGTGATAAACCTACCGAGCTTA  
GAGATAGCTGGTTATTCAGGAAAAGGATTTTAGTCCTACCTTAAGTTTCTT--ATTA  
TTGATTAATTCCAC-AACTTAAGAGTTATTCAAATAAGGTACAGCCTATTTGAAAAAGG  
ATACAACCTA-----  
-----  
----CGAAACCCTCCACCA--ATACTGAATGACTTCATA-CTTTATGAAGGACCATATGT  
TAAACTAGTAACAAGAAGA-AGACCTTCTCCA-AAATGCAAGCGTAAGTCATAATGAAC  
AATTCACCTGACACTTAACGTTTATGAATCATAAGTAACAACCCA---CACAAGAAAACCT  
TAC-----CTAAATT-AACGTCAACCTTACACTAGAGCATTTCATGA  
AAGATTAAGAAAGGGAAAGGAAGGAACTCGGCAAATT--TTAACCTCGCCTGTTTACCAAAA  
CATCGCCTCCTGATAATT---ATAGGAGGTCCAGCCTGCCAGTGACAAA--GTTAAAC  
GGCCGCGGTACCCTAACCGTGCAAAGGTAGCACAATCACTTGTTCTTTAAATGAGGACTA  
GTATGAACGGCATCACGAAGGTTATACTGTCTCCCCCTCCAATCAGTGAAACTGACCTC  
CCCGTGAAGAAGCGGGGATATTATTATAAGACGAGAAGACCCCATGGAGCTTTAAACTCA  
GAATCACCTGCTTCAAC-CCACAGCCTCCCAACTAA-GCAG-TCCTGACTCTCTAGTTTT  
CGGTTGGGGTGACCGCGGAGTAAAAATAAACCTCCACGACGAAAGGAACTACTCTCCTAA  
TCCAAGAGCTACAGCTCTAAGAATCAAA-----TTATTGACAAAA-TTGATCCAAAT  
TTCTTTGATCAACGAACCAAGTTACCCTGGGGATAACAGCGCAATCCATTTCAAGAGCCC  
CTATCGACAAATGGGTTTACG-ACC-TCGATGTTGGATCAGGGTATCCTAGTG-GCGCAG  
CCGCTA-CTAA-AGGTTT

>M. arboricola MN534758, MN534542, MN534649

TTATTGTTAACTGTTTGTCAACTTACACATGCAAGTCTCAGCATCCCCGTGAGAACGCC  
TTTCACCTCCATCAGGATAAGGAGCTGGTATCAGGCACAG-----TT-----TCTTGCCC  
ACAACACCTAGCTTTGCCACACCCTCAAGGGTACTCAGCAGTGATTAACATTGTTTCATGA  
GCGCCAGCTCGACTCAGTTAGACAAAAC--AGAGCCGGCTAATCCGGTGCCAGCCGCCGC

GGCTACACCATTAGGCTCAAGTTTACAATTACTCGGCGTTAAGCGTGTTTTAAAGTGCCT-  
AAACTACTTAGAATTAATAATTTAACCAAGTTGTGACACACTTGTTCCTTAAGAAAAACATA  
AACGAAAGTTATTCTAACCTAACCCTTGAACCCACGACAGCTAGGATACAAACTGGGAT  
TAGGTACCCCACTATGCCTAGCCGTAAAACATTAACCTTACACCC-CCCACCGCCAGGGAA  
TTACGAGCCCAAGCTTAAAACCCAAAGGACTTGACGGTGTCCCACCCACCTAGAGGAGCC  
TGTTCTATAA-TCGATTCTCCCC-GATTTACCTCACCCTTCTAGCCTC--TCAGCCTGT  
ATACCTCCGTCGTAAGCTTACCATGTGAACGCA-CCACAGTGAGCAAGAAGAT--CTTCC  
ATAAATACGTCAGGTCAAGGTGCAGCCCACGATGTGGGAAGTAATGGGCTACAATTTCTA  
CAAT--TAGAACAAA-CGAAAGACTACATGCAA-TTTAGTCATGAAGGCGGATTTAGTAG  
TAAAAGAAAAATAGAGAGTTCTTTTTTAACTAGGCACTGGGACGCGTACACACCGCCCGTC  
ACCCTCTTCAAATGTAACCTTCAATAG-TTTTTAACAAAT-TTTGTACCACACAGAAGAGGT  
AAGTCGTAACACGGTAAGCGTACTGGAAAGTGCCTTGGATCAA-CAAAGTGTAGCTTAA  
TTAAA-GCATCTCGCTTACACCGAAAATATATCTGTTTAAACCCAGATCACCTTGAACGCC  
TAAAACCTAGCTTTACTTCCCCA---CACATA-CTCT-CCTAACTTTTTTCCC----TAAA  
TAAAACATTTTTACT-ATTTAGTAGAGGCGATCAAAAAATATCTT-AAAGCTATAAAAA-  
TAGTACCGCAAGGGAAAGGTGAAATAGTAATGAAATAACCCTTAAGCCAAAAAAGCAGA  
GATTAAACCTCGTACCTTTTGCATCATGGTTTAGCTAGTCTAACCAAGCAAATGCATTA  
T-AGTTTGACCCCCGAAACTAAGCGAGCTACTTTAAAACAGCCTTA-AGGGCAAACCCG  
TCTCTGTTGCAAAAGAGTGGGAAGATTTT-AAAATAGAGGTGATAAACCTACCGAGCTTA  
GAGATAGCTGGTTATTTCAGGAGACGGATTTAAGTCTACCTTAAGTTTTCC--CATAACT  
TCTAATACTTC-----  
-----GCAG  
CCACCTTTT-AAAAAGCGTTAAAGCTTTCTTTT--AATCTCGCATTAA-TTCCCCCA-TT  
TTACCGAAACCCTCCACCC--ATACTGAATGACTTCATA-CAATATGAAAGACCATATGC  
TAAAACCTAGTAACAAGAAGA-AGAACTTCTCCA-AAATGCAAGCGTAAGTCATAATGAAC  
AATTCCTGACAATTAACGTCTATTAGTCCTAAGTAGTAACCTC---CTCAAGAAAACCC  
TAC-----TTAAAAC-AACGTCAACCTTACACCGGAGCATTTACAGA  
AAGATTAAAAGAGCCGGAAGGAACCTCGGCAAATTACTTAACCCCGCCTGTTTACCAAAAA  
CATCGCCTCCTGACAAACT---ATAGGAGGTCCAGCCTGCCAGTGACAAA--GTTAAAC  
GGCCGCGGTACCCTAACCGTGCAAAGGTAGCACAATCACTTGTTCCTTTAAATGAGGACTA

GTATGAATGGCATCACGAGGGTTATACTGTCTCCCCCTCTAATCAGTGAAACTGACCCC  
CCCGTGAAGAAGCGGGGATACTAATATAAGACGAGAAGACCCCATGGAGCTTTAAACTCA  
GTATCACCTGCCACATA-CCACAGCCTCTCACCCAC-GCAG-TTCTGAT-AACTAGTTTT  
CGGTTGGGGTGACCGCGGAGTAAACAAAACCTCCTCGATGAAAGGAATTTAATTCCTAA  
TCCAAGAGCCACAACCTCTAAGAATCAA-----TTATTGACAAAAATTGATCCAAGC  
ACTATTGATCAACGAACCAAGTTACCCTGGGGATAACAGCGCAATCCATTTCAAGAGCTC  
ATATCGACAAATGGGTTTACG-ACC-TCGATGTTGGATCAGGGTATCCCAGTG-GCGCAG  
CCGCTA-CTAA-AGGTTT

>M. arboricola MN534759, MN534543, MN534650

TTATTGTTAACTGTTTTGTCAACTTACACATGCAAGTCTCAGCATCCCCGTGAGAACGCC  
TTTCACCTCCATCAGGATAAGGAGCTGGTATCAGGCACAG-----TT-----TCTTGCCC  
ACAACACCTAGCTTTGCCACACCCTCAAGGGTACTCAGCAGTGATTAACATTGTTTCATGA  
GCGCCAGCTCGACTCAGTTAGACAAAAC--AGAGCCGGCTAATCCGGTGCCAGCCGCCGC  
GGCTACACCATTAGGCTCAAGTTTACAATTACTCGGCGTTAAGCGTGTTTAAGTGCCT-  
AAACTACTTAGAATTTAAATTTAACCAAGTTGTGACACACTTGTCTTAAGAAAAACATA  
AACGAAAGTTATTCTAACCTAACCACTTGAACCCACGACAGCTAGGATACAACTGGGAT  
TAGGTACCCACTATGCCTAGCCGTAAACATTAACCTTACACCC-CCCCCGCCAGGGAA  
TTACGAGCCCAAGCTTAAACCCAAAGGACTTGACGGTGTCCCACCCACCTAGAGGAGCC  
TGTTCTATAA-TCGATTCTCCCC-GATTTACCTCACCCTTCTAGCCTC--TCAGCCTGT  
ATACCTCCGTGTAAGCTTACCATGTGAACGCA-CCACAGTGAGCAAGAAGAT--CTTCC  
ATAAATACGTCAGGTCAAGGTGCAGCCCACGATGTGGGAAGTAATGGGCTACAATTTCTA  
CAAT--TAGAACAAA-CGAAAGACTACATGCAA-TTTAGTCATGAAGGCGGATTTAGTAG  
TAAAAGAAAAATAGAGAGTTCTTTTTAACTAGGCACTGGGACGCGTACACACCCGCCCGTC  
ACCCTCTTCAAATGTAACCTCAATAG-TTTTTAACAAT-TTTGTACCACACAGAAGAGGT  
AAGTCGTAACACGGTAAGCGTACTGGAAAGTGCGCTTGGATCAA-CAAAGTGTAGCTTAA  
TTAAA-GCATCTCGCTTACACCGAAAATATATCTGTAAACCCAGATCATCTTGAACGCC  
TAAACCTAGCTTTACTTCCCCA---CACATA-CTCT-CCTAACTTTTTCCC----TAAA  
TAAACATTTTTACT-ATTTAGTAGAGGCGATCAAAAAATATCTT-AAAGCTATAAAAA-  
TAGTACCGCAAGGGAAAGGTGAAATAGTAATGAAATAACCTTAAGCCAAAAAAGCAGA  
GATTAAACCTCGTACCTTTTGCATCATGGTTTAGCTAGTCTAACCAAGCAAATGCATTA

T-AGTTTGACCCCCGAAACTAAGCGAGCTACTTTAAAACAGCCTTA-AGGGCAAACCCG  
TCTCTGTTGCAAAAGAGTGGGAAGATTTT-AAAATAGAGGTGATAAACCTACCGAGCTTA  
GAGATAGCTGGTTATTCAGGAGACGGATTTAAGTCCTACCTTAAGTTTTCC--CATAACT  
TCTAATACTTC-----  
-----GCAG  
CCACCTTTT-AAAAAGCGTTAAAGCTTTCTTTT--AATCTCGCATTAA-TTCCCCCA-TT  
TTACCGAAACCTCCACCC--ATACTGAATGACTTCATA-CAATATGAAGGACCATATGC  
TAAACTAGTAACAAGAAGA-AGAACTTCTCCA-AAATGCAAGCGTAAGTCATAATGAAC  
AATTCACTGACAATTAACGTCTATTAGTCCTAAGTAGTAACCTC---CTCAAGAAAACCC  
TAC-----TTAAAAC-AACGTCAACCTTACACCAGAGCATTTACAGA  
AAGATTAAGAGCCGGAAGGAACCTCGGCAAATTACTTAACCCCGCCTGTTTACCAAAAA  
CATCGCCTCCTGACAAACT---ATAGGAGGTCCAGCCTGCCAGTGACAAA--GTAAAC  
GGCCGCGGTACCCTAACCGTGCAAAGGTAGCACAATCACTTGTTCTTTAAATGAGGACTA  
GTATGAATGGCATCACGAGGTTATACTGTCTCCCCCTCTAATCAGTGAAACTGACCCC  
CCCGTGAAGAAGCGGGATACTAATATAAGACGAGAAGACCCCATGGAGCTTTAAACTCA  
GTATCACCTGCCACATA-CCACAGCCTCTCACCCAC-GCAG-TTCTGAT-AACTAGTTTT  
CGGTTGGGGTGACCGCGGAGTAAAACAAAACCTCCTCGATGAAAGGAATTTAATTCCTAA  
TCCAAGAGCCACAACCTAAGAATCAAA-----TTATTGACAAAAATTGATCCAAGC  
ACTATTGATCAACGAACCAAGTTACCCTGGGGATAACAGCGCAATCCATTTCAAGAGCTC  
ATATCGACAAATGGGTTTACG-ACC-TCGATGTTGGATCAGGGTATCCCAGTG-GCGCAG  
CCGCTA-CTAA-AGGTTT

>M. arboricola MN534760, MN534544, MN534651

TTATTGTAACTGTTTGTCAACTTACACATGCAAGTCTCAGCATCCCCGTGAGAACGCC  
TTTCACCTCTTTCAGGATAAGGAGCTGGTATCAGGCACAG-----TA-----TCTTGCCC  
ACAACACCTAGCTTTGCCACACCCTCAAGGGTACTCAGCAGTGATTAACATTGTTTCATGA  
GCGCCAGCTCGACTCAGTCAGACAAAACCTTAGAGCCGGCTAATCCGGTGCCAGCCGCCG  
GGCTACACCATCAGGCTCAAGTTTACAATTACTCGGCGTTAAGCGTGTTTAAGTACCC-  
AAAC-TGTTAGAATTAATAATTAACCAAGTTGTGACACACTTGTTCCTTAAGAAAAACATA  
AACGAAAGTTATCTAACCCAACCACTTGAACCCACGACAGCTAGGATACAAACTGGGAT  
TAGGTACCCCACTATGCCTAGCCGTAAAACATTAACCTTACACCCACACCCCGCCAGGGAA

TTACGAGCCCAAGCTTAAAACCCAAAGGACTTGACGGTGTCCCACCCACCTAGAGGAGCC  
TGTTCTATAA-TCGATTCTCCCC-GATTCACCTCACCCTTCTAGCCTC--TCAGCCTGT  
ATACCTCCGTCGTAAGCTTACCATGTGAACGCA-CCACAGTGAGCCAGAAGAT--TTACC  
ATAAATACGTCAGGTCAAGGTGCAGCCCACGATGTGGAAAGTAATGGGCTACAATTTCTA  
CCG--TAGAACAAA-CGAAAGACTACATGCAATCTTAGTCATGAAGCGGATTTAGTAG  
TAAAAGAAAATAGAGAGTTCTTTTTAACTAGGCCCTGGGACGCGTACACACCGCCCGTC  
ACCCTCTTCAAATGTAATCTCTATAG-TTTTTAACAAAC-TTTATACCCACAGAAGAGGT  
AAGTCGTAACACGGTAAGCGTACTGGAAAGTGCCTTGGATTAA-CAAAGTGTAGCTTAA  
TTAAA-GCATCTCGCTTACACCGAAAATATCTCTGTAAACCCAGATCACCTTGAGCGCC  
TAAAACCTAGCTTTACTTACACG--CATAAA-CACCCAACAACTTTTTCC---TACGA  
TAAAACATTTTTTCT-ATTTAGTAGAGGCGATCAAAAAATATCTT-AAAGCTATAAAAAG-  
TAGTACCGCAAGGGAAAGGTGAAATAGTAATGAAATAACCTTTAAGCCAAAAAAGCAGA  
GATAAACCTCGTACCTTTTGCATCATGGTTTAGCTAGTCTAACCAAGCAAATGCATTT  
T-AGTTTGACCCCCGAAACTAAGCGAGCTACTTTAAAACAGCCTTC-AGAGCTAACCCG  
TCTCTGTTGCAAAAGAGTGGGAAGATTTT-AAAGTAGAGGTGATAAACCTACCGAGCTTA  
GAGATAGCTGGTTATTTCAGGAAAGGGATTTAAGTCCTACCTTAAGTTTTTC--TATAACT  
TCTAATACTTC-----  
-----GCAG  
CCACCTTTT-AAAAAGCGTTAAAGCTTTCTTTT--ATCTC-CACTAA-TTCCTCAA-TT  
TTACCGAAACCCCCACCC--ATACTGAATGACTTCCTA-TTATATGAAGGACCATATGC  
TAAAACCTAGTAACAAGAAGA-AGAACTTCTCTA-AAATGCAAGTGTAAGTCATAATGAAC  
AATTCAGTACCAATTAACGTCTATTGACCCAAAGTAGCAACCCC----GCAAGAAAACCC  
TAC-----TTAAAAC-AACGTCAACCTTACACCAGAGCATTAAACAGA  
AAGATTTAAAGAGCCGGAAGGAACCTCGGCAAATTA-CTAACCCCGCCTGTTTACCAAAAA  
CATCCCCTCCTGATAAACC--ATAGGAGGTCCAGCCTGCCAGTGACAAA--GTTAAAC  
GGCCGCGGTACCCTAACCGTGCAAAGGTAGCACAATCACTTGTCTTTAAATGAGGACTA  
GTATGAACGGCATCACGAGGGTTATACTGTCTCCCCCTCTAATCAGTGAAACTGACCCC  
CCCGTGAAGAAGCGGGGATAAAAATATAAGACGAGAAGACCCCATGGAGCTTTAAACTCA  
TTATCACCTGCCACATA-CTACAACCTCTCACCCAC-GCAG-CCCTGAT-AACTAGTTTT  
CGGTTGGGGTGACCGCGGAGCAAAACAAAACCTCCTCGATGAAAGGAACCTGACCTCCTAA

TCCAAGAGCCACAACCTCTAAGAATCAAA-----TTATTGACAAAAATTGATCCAAAT  
ACTATTGATCAACGAACCAGGTTACCCTGGGGATAACAGCGCAATCCATTTCAAGAGCTC  
ATATCGACAAATGGGTTTACG-ACC-TCGATGTTGGATCAGGGTATCCCAGTG-GCGCAG  
CCGCTA-CTAA-AGGTTC

>M. arboricola MN534761, MN534545, MN534652

TTATTGTTAACTGTTTTGTCAACTTACACATGCAAGTCTCAGCATCCCCGTGAGAACGCC  
TTTCACCTCTTTCAGGATAAGGAGCTGGTATCAGGCACAG---ACTA-----TCTTGCCC  
ACAACACCTAGCTTTGCCACACCCTCAAGGGTACTCAGCAGTGATTAACATTGTTTCATGA  
GCGCCAGCTCGACTCAGTTAGACAAAACCTTAGAGCCGGCTAATCCGGTGCCAGCCGCCGC  
GGCTACACCATCAGGCTCAAGTTTACAATTACTCGGCGTTAAGCGTGTTTTAAGTACC-  
AAAC-TGTTAGAATTTAAAATTTAACCAAGTTGTGACACACTTGTTCCTTAAGAAAAACATA  
AACGAAAGTTATTTCTAACCCAACCACTTGAACCCACGAGAGCTAGGATACAACTGGGAT  
TACGTACCCCACTATGCCTAGCCGTAAAACATTAACCTTACACCCACACCCCGCCAGGGAA  
TTACGAGCCCAAGCTTAAAACCCAAAGGACTTGACGGTGTCCCACCCACCTAGAGGAGCC  
TGTTCTATAA-TCGATTCTCCCC-GATTCACCTCACCCTTCTAGCCTC--TCAGCCTGT  
ATACCTCCGTGTAAGCTTACCATGTGAACGCA-CCACAGTGAGCCAGAAGAT--TTACC  
ATAAATACGTCAGGTCAAGGTGCAGCCACGATGTGGAAAGTAATGGGCTACAATTTCTA  
CCG---TAGAACAAA-CGAAAGACTACATGCAATCTTAGTCATGAAGGCGGATTTAGTAG  
TAAAAGAAAAATAGAGAGTTCTTTTTTAACTAGGCCCTGGGACGCGTACACACCCGCCCGTC  
ACCCTCTTCAAATGTAATCTCTATAG-TTTTTAACAAC-TTTATACCCACAGAAGAGGT  
AAGTCGTAACACGGTAAGCGTACTGGAAAGTGCGCTTGGATTAA-CAAAGTGTAGCTTAA  
TTAAA-GCATCTCGCTTACACCGAAAATATCTCTGTAAACCCAGATCACCTTGAGCGCC  
TAAAACCTAGCTTTACTTACACG---CATAAA-CACCCAACAACCTTTTTTCC---TACGA  
TAAAACATTTTTTCT-ATTTAGTAGAGGCGATCAAAAAATATCTT-AAAGCTATAAAAAG-  
TAGTACCGCAAGGAAAGGTGAAATAGTAATGAAATAACCTTTAAGCCAAAAAAGCAGA  
GATAAAACCTCGTACCTTTTGCATCATGGTTTAGCTAGTCTAACCAAGCAAATGCATTT  
T-AGTTTGACCCCCGAACTAAGCGAGCTACTTTAAAACAGCCTTT-AGAGCTAACCCG  
TCTCTGTTGCAAAAGAGTGGGAAGATTTT-AAAGTAGAGGTGATAAACCTACCGAGCTTA  
GAGATAGCTGGTTATTCAGGAAAGGGATTTAAGTCTACCTTAAGTTTTTC--TATAACT  
TCTAATACTTC-----

-----GGCCCTAAAAGCAG  
CCACCTTTTAAAAAAGCGTTAAAGCTTTCTTTT--AATCTCACACTAA-TTCCTCAA-TT  
TTACCGAAACCCCCACCC--ATACTGAATGACTTCATA-TTATATGAAGGACCATATGC  
TAAACTAGTAACAAGAAGA-AGAACTTCTCTA-AAATGCAAGTGTAAGTCATAATGAAC  
AATTCACTGACAATTAACGTCTATTGACCCAAAGTAGCAACCCC----GCAAGAAAACCC  
TAC-----TTAAAAC-AACGTCAACCTTACACCAGAGCATTAAACAGA  
AAGATTTAAAGAGCCGGAAGGAACCTCGGCAAATTA-CTAACCCCGCCTGTTTACCAAAAA  
CATCGCCTCCTGATAAACC---ATAGGAGGTCCAGCCTGCCAGTGACAAA--GTTAAAC  
GGCCGCGGTACCCTAACCGTGCAAAGGTAGCACAATCACTTGTTCCTTTAAATGAGGACTA  
GTATGAACGGCATCACGAGGGTTATACTGTCTCCCCCTCTAATCAGTGAAACTGACCCC  
CCCGTGAAGAAGCGGGGATAAAAATATAAGACGAGAAGACCCCATGGAGCTTTAAACTCA  
GTATCACCTGCCACATA-CTACAACCTCTCACCCAC-GCAG-CCCTGAT-AACTAGTTTT  
CGGTTGGGGTGACCGCGGAGCAAAACAAAACCTCCTCGATGAAAGGAACTGACCTCCTAA  
TCCAAGAGCCACAACCTCTAAGAATCAA-----TTATTGACAAAAATTGATCCAAT  
ACTATTGATCAACGAACCAAGTTACCCTGGGGATAACAGCGCAATCCATTTCAAGAGCCC  
ATATCGACAAATGGGTTTACG-ACC-TCGATGTTGGATCAGGGTATCCCAGTG-GCGCAG  
CCGCTA-CTAA-AGGTTC

>M. pulchella MN534762, MN534546, MN534653

TTATTGTTAGCTGTTTGTGCGACTTACACATGCAAGTCTCAGCATCCCTGTGAGAACGCCC  
TTTCACCTCTATCAGGATAAGGAGCTGGTATCAGGCACAG---ACTA-----TCTTGCCC  
ACAACACCTAGCTCTGCCACACCCTCAAGGGTACTCAGCAGTGATTAACATTGTTTATGA  
GCGCCAGCTCGACTCAGTCAGACAAAGTA-AGAGCCGGCTAATCCGGTGCCAGCCGCCGC  
GGCTACACCATTAGGCTCAAGTTTACAATTATTGGCGTTAAGCGTGTTTTAAGTTTCC-  
TCATTTATTAGAATTTAAATTTAACCAAGTTGTGACACACTTGTTTCATAAGAAAAACATA  
AACGAAAGTTATTCTAACCAACCACTTGAATCCACGACAGCTAGGACACAACTGGGAT  
TAGGTACCCCACTATGCCTAGCCGTAAAATATTAACCTACACCT-TCCTTCGCCAGGGAA  
TTACGAGCCCAAGCTTAAAACCCAAAGGACTTGACGGTGTCCCACCCATCTAGAGGAGCC  
TGTTCTATAA-TCGATTCTCCC-GATTCACCTCACCACTTCTAGCCTC--TCAGCCTGT  
ATACCTCCGTCGTAAGCTTACCATGTGAACGCA-CCATAGTGAGCCCAAAGAT--TTCCC  
ATAAATACGTCAGGTCAAGGTGCAGCCCACGATGTGGAAAGTAATGGGCTACAATTTCTA

TCAT--TAGAACAAA-CGAAAGACTACATGCAA-TTCAGTCATGAAGGCGGATTTAGTAG  
TAAAAGAAAATAGAGAGTTCTTTTTAACTAGGCACTGGGACGCGTACACACCGCCCGTC  
ACCCTCTTCAAATGTAACCTCCACGGTTTTTAAACAAT-TCCATACCCACAGAAGAGGT  
AAGTCGTAACACGGTAAGCGTACTGGAAAGTGCCTTGGATTAA-CAAAGTGTAGCTTAA  
TTAAA-GCATCTCGCTTACACCGAAAATATATCTGTAAACCCGGATCACCTTGAA-GCC  
TAAAACCTAGCTTTACTTCCTCG---CATAGA-CACT-CTTAACTTTTCTTC---AACAA  
TAAAACATTTTTAATTATTTAGTACAGGCGATCAAAAAATACCTT-AAAGCTACAAAAA-  
TAGTACCGCAAGGAAAGGTGAAATAGTAATGAAATAACTCTTAAGCCAAAAAAGCAGA  
GATAAACCTCGTACCTTTTGCATCATGGTTTAGCAAGTCTAACCAAGCAAAACGCATTT  
TTAGTTTGACCCCCGAAACTAAGCGAGCTACTTTAAAACAGCTTTT-AGAGCAAACCCG  
TCTCTGTTGCAAAAGAGTGGAAGATTTT-AAAGTAGAGGTGATAAACCTACCGAGCTTA  
GAGATAGCTGGTTATTCAGGAAAGGGATTTAAGTCTTACCTTAAGTCTCCT--TATAATT  
TCTAATACTTCAAT-AGACTTAAGAGCCATTCAAATAAGGTACAGCCTATTTGAACCAGG  
GTACAACCTACT-----CCTAAAAGCAG  
CCACCTTTG-AAAAAGCGTTAAAGCTTTATTTT--AATCTCTCATCAA-TTCCTCAA-TT  
TTACCGAAACCCCCACCCCCATACTGAATGACTTCATA-CTTTATGAAGGACCATATGC  
TAAAACCTAGTAACAAGAAGA-AGAACTTCTCCA-AAATGCAAGCGTAAATCATAATGAAC  
AACTCACTGACAATTAACGTCCATAAGCCCAAAGTAGTAACTCA----CCAAGAAAACCTC  
TAC-----TTAAAAC-AACGTTAACCTTACACCAGCGCATTTCACAGA  
AAGATTAAAAGAATCGGAAGGAACTCGGCAAATTA-CTAACCCCGCCTGTTTACCAAAAA  
CATCGCCTCCTGATAAACT---ATAGGAGGTCCAGCCTGCCAGTGACAAA--GTTAAAC  
GGCCGCGGTACCCTAACCGTGCAAAGGTAGCGCAATCACTTGTCTTTAAATGAGGACTA  
GTATGAATGGCATCACGAGGGTTATACTGTCTCCCACTCTAATCAGTGAAACTGACCTC  
CCCGTGAAGAAGCGGGGATATTAATATAAGACGAGAAGACCCCATGGAGCTTTAAACTCA  
GTATCACCTGCCACACA-TTACAACCTCTCACCCAC-GCAG-TCCTGAT-AACTAGTTTT  
CGGTTGGGGTGACCGCGGAGTAAAACAAAACCTCCTCGATGAAAGGAATTAACCTCCTAA  
TCCAAGAGCCACAACCTAAGAATCAAA-----TTATTGACAAAAATTGATCCAAAT  
ACTATTGATCAACGAACCAAGTTACCCTGGGGATAACAGCGCAATCCATTTCAAGAGCTC  
ATATCGACAAATGGGTTTACG-ACC-TCGATGTTGGATCAGGGTATCCAGTG-GCGCAG  
CCGCTA-CTAA-AGTTTC



>M. pulchella MN534763, MN534547, MN534654

TTATTGTTAGCTGTTTTGTCTGACTTACACATGCAAGTCTCAGCATCCCTGTGAGAACGCC  
TTTCACCTCTATCAGGATAAGGAGCTGGTATCAGGCACAG---ACTA-----TCTTGCCC  
ACAACACCTAGCTCTGCCACACCCTCAAGGGTACTCAGCAGTGATTAACATTGTTTTATGA  
GCGCCAGCTCGACTCAGTCAGACAAAGTATAGAGCCGGCTAATCCGGTGCCAGCCGCCGC  
GGCTACACCATTAGGCTCAAGTTTACAATTATTCGGCGTTAAGCGTGTTTTAAGTACCC-  
TAAACTATTAGAATTTAAATTTAACCAAGTTGTGACACACTTGTTTCATAAGAAAAACATA  
AACGAAAGTTATTTCTAACCAAACCACTTGAATCCACGACAGCTAGGACACAACTGGGAT  
TAGGTACCCCACTATGCCTAGCCGTAAAATATTAACCTACACCT-TCCTTCGCCAGGGAA  
TTACGAGCCCAAGCTTAAAACCAAAGGACTTGACGGTGTCCACCCATCTAGAGGAGCC  
TGTTCTATAA-TCGATTCTCCCC-GATTCACCTCACCACTTCTAGCCTC--TCAGCCTGT  
ATACCTCCGTCGTAAGCTTACCATGTGAACGCA-CCATAGTGAGCCCAAAGAT--TTCCC  
ATAAATACGTCAGGTCAAGGTGCAGCCCACGATGTGGAAAGTAATGGGCTACAATTTCTA  
TCAT--TAGAACAAA-CGAAAGACTACATGCAA-TTCAGTCATGAAGGCGGATTTAGTAG  
TAAAAGAAAAATAGAGAGTTCTTTTTTAACTAGGCACTGGGACGCGTACACACCCGCCGTC  
ACCCTCTTCGAATGTAACCTTCCCACGGTTTTTTAACAAT-TCCATACCCACAGAAGAGGT  
AAGTCGTAACACGGTAAGCGTACTGGAAAGTGCCTTGGATTAA-CAAAGTGTAGCTTAA  
TTAAA-GCATCTCGCTTACACCGAAAATATATCTGTAAACCCGGATCACCTTGAA-GCC  
TAAAACCTAGCTTTACTTCCCTG---CATAAA-CACT-CTTAACTTTTCTTC---AACAA  
TAAAACATTTTTTAATTATTTAGTACAGGCGATCAAAAAATACCTT-AAAGCTACAAAAA-  
TAGTACCGCAAGGGAAAGGTGAAATAGTAATGAAATAACTCTTAAGCCAAAAAAGCAGA  
GATAAAACCTCGTACCTTTTGCATCATGGTTTAGCTAGTCTAACCAAGCAAACGCATTT  
TTAGTTTGACTCCCCGAAACTAAGCGAGCTACTTTAAAACAGCTTTT-AGAGCAAACCCG  
TCTCTGTTGCAAAAGAGTGGGAAGATTTT-AAAGTAGAGGTGATAAACCTACCGAGCTTA  
GAGATAGCTGGTTATTCAGGAAAGGGATTTAAGTCTTACCTTAAGTCTCCT--TATAATT  
TCTAATACTTCAAT-AGACTTAAGAGCCATTCAAATAAGGTACAGCCTATTTGAACCAGG  
GTACAACCTACTCG-----CCTAAAAGCAG  
CCACCTTTG-AAAAGCGTTAAAGCTTTATTTTC--AATCTCTCATCAA-TTCCTCAA-TT  
TTACCGAAACCCCCACCCC-ATACTGAATGACTTCATA-CTTTATGAAGGACCATATGC  
TAAAACCTAGTAACAAGAAGA-AGAACTTCTCCA-AAATGCAAGCGTAAATCATAATGAAC

AACTCACTGACAATTAACGTCCATAAGCCCAAAGTAGTA ACTCA----CCAAGAAAACTC  
TAC-----TTAAAAC-AACGTTAACCTTACACCAGCGCATTACAGAGA  
AAGATTA AAAAGAATCGGAAGGAACTCGGCAAATTA-CTAACCCCGCCTGTTTACCAAAAA  
CATCGCCTCCTGATAAACT---ATAGGAGGTCCAGCCTGCCAGTGACAAA--GTTAAAC  
GGCCGCGGTACCCTAACCGTGCAAAGGTAGCGCAATCACTTGTTCCTTTAAATGAGGACTA  
GTATGAATGGCATCACGAGGGTTATACTGTCTCCCCACTCTAATCAGTGAAACTGACCTC  
CCCGTGAAGAAGCGGGGATATTAATATAAGACGAGAAGACCCCATGGAGCTTTAAACTCA  
GTATCACCTGCCACACA-TTACAACCTCTCACCCAC-GCAG-TCCTGAT-AACTAGTTTT  
CGGTTGGGGTGACCGCGGAGTAAAACAAAACCTCCTCGATGAAAGGAATTA ACTTCCTAA  
TCCAAGAGCCACA ACTCTAAGAATCAAA-----TTATTGACAAAAATTGATCCAAAT  
ACTATTGATCAACGAACCAAGTTACCCTGGGGATAACAGCGCAATCCATTTCAAGAGCTC  
ATATCGACAAATGGGTTTACG-ACC-TCGATGTTGGATCAGGGTATCCCAGTG-GCGCAG  
CCGCTA-CTAA-AGGTTC

>M. pulchella MN534764, MN534548, MN534655

TTATTGTTAGCTGTTTGTGCGACTTACACATGCAAGTCTCAGCATCCCTGTGAGAACGCC  
TTTCACCTCTATCAGGATAAGGAGCTGGTATCAGGCACAG---ACTA-----TCTTGCCC  
ACAACACCTAGCTCTGCCACACCCTCAAGGGTACTCAGCAGTGATTAACATTGTTTATGA  
GCGCCAGCTCGACTCAGTCAGACAAAGTA-AGAGCCGGCTAATCCGGTGCCAGCCGCCG  
GGCTACACCATTAGGCTCAAGTTTACAATTATTCGGCGTTAAGCGTGTTTTAAGTACCC-  
TAAACTATTAGAATTA AAAATTTAACCAAGTTGTGACACACTTGTTTCATAAGAAAAACATA  
AACGAAAGTTATTCTAACCAAAACCACTTGAATCCACGACAGCTAGGACACAAACTGGGAT  
TAGGTACCCCACTATGCCTAGCCGTAAAATATTAACCTACACCT-TCCTTCGCCAGGGAA  
TTACGAGCCCAAGCTTAAAACCCAAAGGACTTGACGGTGTCCCACCCATCTAGAGGAGCC  
TGTTCTATAA-TCGATTCTCCCC-GATTCACCTCACCACTTCTAGCCTC--TCAGCCTGT  
ATACCTCCGTCGTAAGCTTACCATGTGAACGCA-CCATAGTGAGCCCAAAGAT--TTCCC  
ATAAATACGTCAGGTCAAGGTGCAGCCCACGATGTGGAAAGTAATGGGCTACAATTTCTA  
TCAT--TAGAACAAA-CGAAAGACTACATGCAA-TTCAGTCATGAAGCGGATTTAGTAG  
TAAAAGAAAATAGAGAGTTCTTTTTAACTAGGCACTGGGACGCGTACACACCGCCCGTC  
ACCCTCTTCAAAGGTA ACTTCCCACGGTTTTTAAACAAT-TTCATACCCACAGAAGAGGT  
AAGTCGTAACACGGTAAGCGTACTGGAAAGTGCGCTTGATTAA-CAAAGTGTAGCTTAA

TTAAA-GCATCTCGCTTACACCGAAAATATATCTGTAAACCCGGATCACCTTGAA-GCC  
TAAAACCTAGCTTTACTTCCTCG---CATAAA-CACT-CTTAACTTTTCTTC---AACAA  
TAAAACATTTTTTAATTATTTAGTACAGGCGATCAAAAAATACCTT-AAAGCTACAAAAA-  
TAGTACCGCAAGGGAAAGGTGAAATAGTAATGAAATAACTCTTAAGCCAAAAAAGCAGA  
GATAAACCTCGTACCTTTTGCATCATGGTTTAGCAAGTCTAACCAAGCAAAACGCATTT  
TTAGTTTGACCCCCGAAACTAAGCGAGCTACTTTAAAACAGCTTTT-AGAGCAAACCCG  
TCTCTGTTGCAAAGAGTGGAAGATTTT-AAAGTAGAGGTGATAAACCTACCGAGCTTA  
GAGATAGCTGGTTATTCAGGAAAGGGATTTAAGTCTTACCTTAAGTCTCCT--TATAATT  
TCTAATACTTCAAT-AGACTTAAGAGCCATTCAAATAAGGTACAGCCTATTTGAACCAGG  
GTACAAACTACTGCGAC-----CCTAAAAGCAG  
CCACCTTTG-AAAAGCGTTAAAGCTTTATTTT- AATCTCTCATCAA-TTCCTCAA-TT  
TTACCGAAACCCCCACCCC-ATACTGAATGACTTCATA-CTTTATGAAGGACCATATGC  
TAAAACCTAGTAACAAGAAGA-AGAACTTCTCCA-AAATGCAAGCGTAAATCATAATGAAC  
AACTCACTGACAATTAACGTCCATAAGCCCAAAGTAGTAACTCA----CCAAGAAACTC  
TAC-----TTAAAAC-AACGTTAACCTTACACCAGCGCATTTCACAGA  
AAGATTTAAAAGAATCGGAAGGAAGTTCGGCAAATTA-CTAACCCCGCCTGTTTACCAAAAA  
CATCGCCTCCTGATAAACT---ATAGGAGGTCCAGCCTGCCAGTGACAAA--GTTAAAC  
GGCCGCGGTACCCTAACCGTGCAAAGGTAGCGCAATCACTTGTTCTTTAAATGAGGACTA  
GTATGAATGGCATCACGAGGGTTATACTGTCTCCCCACTCTAATCAGTGAAACTGACCTC  
CCCGTGAAGAAGCGGGGATATTAATATAAGACGAGAAGACCCCATGGAGCTTTAAACTCA  
GTATCACCTGCCACACA-TTACAACCTCTCACCCAC-GCAG-TCCTGAT-AACTAGTTTT  
CGGTTGGGGTGACCGCGGAGTAAAACAAAACCTCCTCGATGAAAGGAATTAAGTTCCCTAA  
TCCAAGAGCCACAACCTCTAAGAATCAAA-----TTATTGACAAAAATTGATCCAAAT  
ACTATTGATCAACGAACCAAGTTACCCTGGGGATAACAGCGCAATCCATTTCAAGAGCTC  
ATATCGACAAATGGGTTTACG-AAC-TTGATGTTGGATCAGGGTATCCCAGTG-GCGCAG  
CCGCTA-CTAA-AGGTTT

>M. pulchella MN534765, MN534549, MN534656

TTATTGTTAGCTGTTTGTGACTTACACATGCAAGTCTCAGCATCCCTGTGAGAACGCC  
TTTCACCTCTATCAGGATAAGGAGCTGGTATCAGGCACAG---ACTA-----TCTTGCCC  
ACAACACCTAGCTCTGCCACACCCTCAAGGGTACTCAGCAGTGATTAACATTGTTTATGA

GCGCCAGCTCGACTCAGTCAGACAAAGTA-AGAGCCGGCTAATCCGGTGCCAGCCGCCGC  
GGCTACACCATTAGGCTCAAGTTTACAATTATTCGGCGTTAAGCGTGTTTTAAGTACCC-  
CAAACCTATTAGAATTAATAATTTAACCAAGTTGTGACACACTTGTTCATAAGAAAAACATA  
AACGAAAGTTATTCTAACCAAAACCACTTGAATCCACGACAGCTAGGACACAAACTGGGAT  
TAGGTACCCCACTATGCCTAGCCGTAAAATATTAACCTACACCT-TCCTTCGCCAGGGAA  
TTACGAGCCCAAGCTTAAAACCAAAAGGACTTGACGGTGTCCACCCATCTAGAGGAGCC  
TGTTCTATAA-TCGATTCTCCCC-GATTCACCTCACCCTTCTAGCCTC--TCAGCCTGT  
ATACCTCCGTCGTAAGCTTACCATGTGAACGCA-CCATAGTGAGCCCAAAGAT--TTCCC  
ATAAATACGTCAGGTCAAGGTGCAGCCCACGATGTGGAAAGTAATGGGCTACAATTTCTA  
TCAT--TAGAACAAA-CGAAAGACTACATGCAA-TTCAGTCATGAAGCGGATTTAGTAG  
TAAAAGAAAAATAGAGAGTTCTTTTTAACTAGGCACTGGGACGCGTACACACCCGCCCGTC  
ACCCTCTTCAAATGTAACCTCCACGGTTTTTAAACAAT-TCCATACCCACAGAAGAGGT  
AAGTCGTAACACGGTAAGCGTACTGGAAAGTGCCTTGGATTAA-CAAAGTGTAGCTTAA  
TTAAA-GCATCTCGCTTACACCGAAAATATATCTGTAAACCCGGATCACCTTGAA-GCC  
TAAAACCTAGCTTTACTTCCCTCG---CATAAA-CACT-CTTGACTTTTCTTC---AACAA  
TAAAACATTTTTAATTATTTAGTACAGGCGATCAAAAAATACCTT-AAAGCTACAAAAA-  
TAGTACCGCAAGGGAAAGGTGAAATAGTAATGAAATAACTCTTAAGCCAAAAAAGCAGA  
GATAAAACCTCGTACCTTTTTGCATCATGGTTTAGCAAGTCTAACCAAGCAAACGCATTT  
TTAGTTTGACCCCCGAAACTAAGCGAGCTACTTTAAAACAGCTTTT-AGAGCAAACCCG  
TCTCTGTTGCAAAGAGTGGGAAGATTTT-AAAGTAGAGGTGATAAACCTACCGAGCTTA  
GAGATAGCTGGTTATTTCAGGAAAGGGATTTAAGTCTTACCTTAAGTCTCCT--TATAATT  
TCTAATACTTCAAT-AGACTTAAGAGCCATTCAAATAAGGTACAGCCTATTTGAACCAGG  
GTACAACCTACTTCGCT-GGTAAC-----CCTAAAAGCAG  
CCACCTTTG-AAAAGCGTTAAAGCTTTATTTT--AATCTCTCATCAA-TTCCTCAA-TT  
TTACCGAAACCCCCACCCCCATACTGAATGACTTCATA-CTTTATGAAGGACCATATGC  
TAAAACCTAGTAACAAGAAGA-AGAACTTCTCCA-AAATGCAAGCGTAAATCATAATGAAC  
AACTCACTGACAATTAACGTCCATAAGCCCAAAGTAGTAACTCA----CCAAGAAAACTC  
TAC-----TTAAAAC-AACGTTAACCTTACACCAGCGCATTACAGA  
AAGATTAAAAGAATCGGAAGGAACCTCGGCAAATTA-CTAACCCCGCCTGTTTACCAAAAA  
CATCGCCTCCTGATAAACT---ATAGGAGGTCCAGCCTGCCAGTGACAAA--GTAAAC

GGCCGCGGTACCCTAACCGTGCAAAGGTAGCGCAATCACTTGTTCTTTAAATGAGGACTA  
GTATGAATGGCATCACGAGGGTTATACTGTCTCCCCACTCTAATCAGTGAAACTGACCTC  
CCCGTGAAGAAGCGGGGATATTAATATAAGACGAGAAGACCCCATGGAGCTTTAAACTCA  
GTATCACCTGCCACACA-TTACAACCTCTCACCCAC-GCAG-TCCTGAT-AACTAGTTTT  
CGGTTGGGGTGACCGCGGAGTAAAACAAAACCTCCTCGATGAAAGGAATTAACTTCCTAA  
TCCAAGAGCCACAACCTCTAAGAATCAA-----TTATTGACAAAAATTGATCCAAAT  
ACTATTGATCAACGAACCAAGTTACCCTGGGATAACAGCGCAATCCATTTCAAGAGCTC  
ATATCGACAAATGGGTTTACG-ACC-TCGATGTTGGATCAGGGTATCCAGTG-GCGCAG  
CCGCTA-CTAA-AGGTTC
