# Supplementary material for: A little frog leaps a long way: compounded colonizations of the Indian Subcontinent discovered in the tiny Oriental frog genus Microhyla (Amphibia: Microhylidae)
Source: PubMed Central journal article supplement (PMC7337035; doi:10.7717/peerj.9411), 2020-07-03
Supplement: peerj-08-9411-s019.pdf [file peerj-08-9411-s019.pdf]

**Supplemental File 4. Raw data file - aligned newly generated nuDNA sequences (*BDNF* gene) (see Supplemental Table S1 for sequence details).**

>M. nepenthicola MN534393

-----AGTTGCATGAAAGCTGCCCAATGAAAGAAGCCAATGTCA  
GAGGACAAAGTGGCCTGGCTTTTCCGGGTCTTCGGACCCACGGTACTCTGGAGAACATAG  
GTGGGCCGATAGGTGGTGGTTC AAGAGGAGGTGGACTTCCATCGCTGACAGATACCTTTG  
AGCAGGTTATAGAGGAACTCCTGGAAGAAGAACAGACCATGAGGCAGAGTGAAGAGAACA  
AGGAC---GACATGTATTCATCTAGAGTAATGCTGAGCACTCAAGTGCCTTTGGAGCCAC  
CTTTGCTTTTTTCTCCTTGAGGAGTACAAAACTACTTGGATGCTGCAAACATGTCCATGA  
GAGTGAGGCGCCACTCTGACCCCGCTCGGCGCGGGGAACTCAGCGTCTGTGACAGTATTA  
GCGAATGGGTGACTGCGGCCGACAAGAAAACTGCAGTGGACATGGCGGGGCAAACGGTTA  
CCGTTCTGGAAAAAGTCCCAGTACCCAAAGGTCAACTGAAACAATATTTCTATGAGACCA  
AATGCAATCCTATGGGCTACATGAAGGAAGGTTGCAGGGGCATTGACAAAAGGTACTGGA  
ACTCGCAATGCCGAACTACCCAGTCTTATGTGCGTGCGCTCACCATGGATAGCAAAAAAA  
AAGTTGGCTGGCGCTTTATAAGGATAGACACTTCTTGTGTATGTACACTGACCATTAAA-

>M. borneensis MN534394

-----AGTTGCATGAAAGCTGCCCAATGAAAGAAGCCAATGTCA  
GAGGACAAAGTGGCCTGGCTTTTCCGGGTCTTCGGACCCACGGTACTCTGGAGAACATAG  
GTGGGCCGATAGGTGGTGGTTC AAGAGGAGGTGGACTTCCATCGCTGACAGATACCTTTG  
AGCAGGTTATAGAGGAACTCCTGGAAGAGGAACAGACCATGAGGCAGAGTGAAGAGAACA  
AGGAC---GACATGTATTCATCTAGAGTAATGCTGAGCACTCAAGTGCCTTTGGAGCCAC  
CTTTGCTTTTTTCTCCTTGAGGAGTACAAAACTACTTGGATGCTGCAAACATGTCCATGA  
GAGTGAGGCGCCACTCTGACCCCGCTCGGCGCGGGGAACTCAGCGTCTGTGACAGTATTA  
GCGAATGGGTGACTGCGGCCGACAAGAAAACTGCAGTGGACATGGCGGGGCAAACGGTTA  
CCGTTCTGGAAAAAGTCCCAGTACCCAAAGGTCAACTGAAACAATATTTCTATGAGACCA  
AATGCAATCCTATGGGCTACATGAAGGAAGGTTGCAGGGGCATTGACAAAAGGTACTGGA  
ACTCGCAATGCCGAACTACCCAGTCTTATGTGCGTGCGCTCACCATGGATAGCAAAAAAA  
AAGTTGGCTGGCGCTTTATAAGGATAGACACTTCTTGTGTATGTACACTGACCATTAAA-

>Microhyla sp. 1 MN534395

-----AGTTGCATGAAAGCTGCCCAATGAAAGAAGCCAATGTCA  
GAGGACAAAGTGGCCTGGCTTTTCCGGGTCTTCGGACCCACGGTACTCTGGAGAACATAG  
GTGGGCCGATAGGTGGTGGTTCAAGAGGAGGTGGACTTCCATCGCTGACAGATACCTTTG  
AGCAGGTTATAGAGGAACTCCTGGAAGAGGAACAGACCATGAGGCAGAGTGAAGAGAACA  
AGGAC---GACATGTATTCATCTAGAGTAATGCTGAGCACTCAAGTGCCTTTGGAGCCAC  
CTTTGCTTTTTCTCCTTGAGGAGTACAAAACTACTTGGATGCTGCAAACATGTCCATGA  
GAGTGAGGCGCCACTCTGACCCCGCTCGGCGCGGGGAACTCAGCGTCTGTGACAGTATTA  
GCGAATGGGTGACTGCGGCCGACAAGAAAACTGCAGTGGACATGGCGGGGCAAACGGTTA  
CCGTTCTGGAAAAAGTCCCAGTACCCAAAGGTCAACTGAAACAATATTTCTATGAGACCA  
AATGCAATCCTATGGGCTACATGAAGGAAGGTTGCAGGGGCATTGACAAAAGGTACTGGA  
ACTCGCAATGCCGAACTACCCAGTCTTATGTGCGTGCGCTCACCATGGATAGCAAAAAAA  
AAGTTGGCTGGCGCTTTATAAGGATAGACACTTCTTGTGTATGTACTGACCATTAAA-

>M. malang MN534396

-----AGTTGCATGAAAGCTGCCCAATGAAAGAAGCCAATGTCA  
GAGGACAAAGTGGCCTGGCTTTTCCGGGTCTTCGGACCCACGGTACTCTGGAGAACATAG  
GTGGGCCGATAGGTGGTGGTTCAAGAGGAGGTGGACTTCCATCGCTGACCGATACCTTTG  
AGCAGGTTATAGAGGAACTCCTGGAAGAGGAACAGACCATGAGGCAGAGTGAAGAGAACA  
AGGAC---GACATGTATTCATCTAGAGTAATGCTGAGCACTCAAGTGCCTTTGGAGCCAC  
CTTTGCTTTTTCTCCTTGAGGAGTACAAAACTACTTGGATGCTGCAAACATGTCCATGA  
GAGTGAGGCGCCACTCTGACCCCGCTCGGCGCGGGGAACTCAGCGTCTGTGACAGTATTA  
GCGAATGGGTGACTGCGGCCGACAAGAAAACTGCAGTGGACATGGCGGGGCAAACGGTTA  
CCGTTCTGGAAAAAGTCCCAGTACCCAAAGGTCAACTGAAACAATATTTCTATGAGACCA  
AATGCAATCCTATGGGCTACATGAAGGAAGGTTGCAGGGGCATTGACAAAAGGTACTGGA  
ACTCGCAATGCCGAACTACCCAGTCTTATGTGCGTGCGCTCACCATGGATAGCAAAAAAA  
AAGTTGGCTGGCGCTTTATAAGGATAGACACTTCTTGTGTATGTACTGACCATTAAA-

>M. orientalis MN534397

--ATGGTTATTTCATACTTAAGTTGCATGAAAGCTGCCCAATGAAAGAAGCCAATGTCA

GAGGACAAAGTGGCCTGGCTTATCCGGGTCTTCGGACCCACGGTACTCTGGAGAACATAG  
GTGGGCCGATAGGTGG---TTCAAGAGGAGGTGGACTTCCATCGCTGACAGATACCTTTG  
AGCAGGTTATAGAGGAACTCCTGGAAGAGGAACAGACCATGAGGCAGAGTGAAGAGAACA  
AGGAC---GACATGTATTCATCTAGAGTAATGCTGAGCACTCAAGTGCCTTTGGAGCCAC  
CTTTGCTTTTTCTCCTTGAGGAGTACAAAACTACTTGGATGCCGCAAACATGTCCATGA  
GGGTGAGGCGCCACTCTGACCCTGCTCGGCGCGGGGAACTGAGCGTCTGTGACAGTATTA  
GCGAATGGGTGACTGCGGCCGACAAGAAAACTGCAGTGGACATGGCGGGGCAAACGGTTA  
CCGTTCTGGAAAAAGTCCCAGTACCCAAAGGTCAACTGAAACAATATTTCTATGAGACCA  
AATGCAATCCTATGGGCTACATGAAGGAAGGTTGCAGGGGCATTGACAAAAGGTACTGGA  
ACTCGCAATGCCGAACTACCCAGTCTTATGTGCGTGCGCTCACCATGGATAGCAAAAAAA  
AAGTTGGCTGGCGCTTTATAAGGATAGACACTTCTTGTGTATGTACTGACCATTAAA-

>M. mantheyi KM509398

-----AGTTGCATGAAAGCTGCCCAATGAAAGAAGCCAATGTCA  
GAGGACAAAGTGGCCTGGCTTATCCGGGTCTTCGAACCCACGGTACTCTGGAGAACATAG  
GTGGGCCAATAGGTGG---TTCAAGAGGAGGTGGACTTCCATCGCTGACAGACACCTTTG  
AGCAGGTTATAGAGGAACTCCTGGAAGAGGAACAGACCATGAGGCAGAGTGAAGAGAACA  
AGGAC---GACATGTATTCATCTAGAGTAATGCTGAGCACTCAAGTGCCTTTGGAGCCAC  
CTTTGCTTTTTCTTCTTGAGGAGTACAAAACTACTTGGATGCTGCAAACATGTCCATGA  
GGGTGAGGCGCCACTCTGACCCCGCTAGGCGCGGGGAACTGAGCGTCTGTGACAGTATTA  
GTGAATGGGTGACTGCGGCCGACAAGAAAACTGCAGTGGACATGGCGGGGCAAACGGTTA  
CCGTTCTGGAAAAAGTCCCAGTACCCAAAGGTCAACTGAAACAATATTTCTATGAGACCA  
AATGCAATCCTATGGGCTACATGAAGGAAGGTTGCAGGGGCATTGACAAAAGGTACTGGA  
ACTCGCAATGCCGAACTACCCAGTCTTATGTGCGTGCGCTCACCATGGATAGCAAAAAAA  
AAGTTGGCTGGCGCTTTATAAGGATAGACACTTCTTGTGTATGTACTGACCATTAAA-

>M. pineticola MN534399

CTATGGTTATTTCACTTAAGTTGCATGAAAGCTGCCCAATGAAAGAAGCCAATGTCA  
GAGGACAAAGTGGCCTGGCTTATCCGGGTCTTCGGACCCACGGTACTCTGGAGAACATAG  
GTGGGCCGATAGGTGG---TTCAAGAGGAGGTGGACTTCCATCGCTGACAGATACCTTTG

AGCAGGTTATAGAGGAACTCCTAGAAGAGGAACAGACCATGAGGCAGAGTGAAGAGAACA  
AGGAC---GACATGTATACATCTAGAGTAATGCTGAGCACTCAAGTGCCTTTGGAGCCAC  
CTTTGCTTTTTCTCCTTGAGGAGTACAAAACTACTTGGATGCTGCAAACATGTCTATGA  
GGGTGAGGCGCCACTCTGACCCCGCTCGGCGTGGGGAAGTGAAGCGTCTGTGACAGTATTA  
GTGAATGGGTGACTGCGGCCGACAAGAAAACTGCAGTGGACATGGCGGGGCAAACGGTTA  
CCGTTCTGGAAAAAGTCCCAGTACCCAAAGGTCAACTGAAACAATATTTCTATGAGACCA  
AATGCAATCCTATGGGCTACATGAAGGATGGTTGCAGGGGCATTGACAAAAGGTACTGGA  
ACTCGCAATGCCGAAGTACCCAGTCTTATGTGCGTGCCTCACCATGGATAGCAAAAAAA  
AAGTTGGCTGGCGCTTTATAAGGATAGACACTTCTTGTGTATGTACTGACCATTAAA-

>M. minuta MN534400

-----AGTTGCATGAAAGCTGCCCAATGAAAGAAGCCAATGTCA  
GAGGACAAAGTGGCCTGGCTTATCCGGGTCTTCGGACCCACGGTACTCTGGAGAACATAG  
GTGGGCCGATAGGTGG---TTCAAGAGGAGGTGGACTTCCATCGCTGACAGATACCTTTG  
AGCAGGTTATAGAGGAGCTCCTGGAAGAGGAACAGACCATGAGGCAGAGTGAAGAGAACA  
AGGAC---GACATGTATTCATCTAGAGTAATGCTGAGCACTCAAGTGCCTTTGGAGCCAC  
CTTTGCTTTTTCTCCTTGAGGAGTACAAAACTACTTGGATGCTGCAAACATGTCCATGA  
GGGTGAGGCGCCACTCTGACCCCGCTCGGCGTGGGGAAGTGAAGCGTCTGTGACAGTATTA  
GCGAATGGGTGACTGCGGCCGACAAGAAAACTGCAGTGGACATGGCGGGGCAAACGGTTA  
CCGTTCTGGAAAAAGTCCCAGTACCCAAAGGTCAACTGAAACAATATTTCTATGAGACCA  
AATGCAATCCTATGGGCTACATGAAGGAAGTTGCAGGGGCATTGACAAAAGGTACTGGA  
ACTCGCAATGCCGAAGTACCCAGTCTTATGTGCGTGCCTCACCATGGATAGCAAAAAAA  
AAGTGGGCTGGCGCTTTATAAGGATAGACACTTCTTGTGTATGTACTGACCATTAAA-

>M. fodiens MN534401

-----TATTTCACTTAAGTTGCATGAAAGCTGCCCAATGAAAGAAGCCAATGTCA  
GAGGACAAAGTGGCCTGGCTTATCCGGGTCTTCGGACCCACGGTACTTTGGAGAACATAG  
GTGGGCCGATAGGTGG---TTCAAGAGGAGGTGGACTTCCATCGCTGACAGATACCTTTG  
AGCAGGTTATAGAGGAACTCCTAGAAGAGGAACAGACCATGAGGCAGAGTGAAGAGAACA  
AGGAC---GACATGTATTCATCTAGAGTAATGCTGAGCACTCAAGTGCCTTTGGAGCCAC

CTTTGCTTTTTCTCCTTGAGGAGTACAAAACTACCTGGATGCAGCAAACATGTCCATGA  
GGGTGAGGCGCCACTCCGACCCCGCTCGGCGCGGGGAACTGAGCGTCTGTGACAGTATTA  
GCGAATGGGTGACTGCGGCCGACAAAAAACCGCAGTGGACATGGCGGGGCAAACGGTTA  
CCGTTCTGGAAAAAGTCCCAGTACCCAAAGGTCAACTGAAACAATATTTCTATGAGACCA  
AATGCAATCCTATGGGCTACATGAAGGAAGGTTGCAGGGGCATTGACAAAAGGTACTGGA  
ACTCGCAATGCCGAACTACCCAGTCTTATGTGCGTGCGCTCACCATGGATAGCAAAAAAA  
AAGTTGGCTGGCGCTTTATAAGGATAGACACTTCTTGTGTATGTACTGACCATTAAA-

>M. achatina MN534402

-----AGTTGCATGAAAGCTGCCCAATGAAAGAAGCCAATGTCA  
GAGGACAAAGTGGCCTGGCTTATCCGGGTCTTCGGACCCACGGTACTCTGGAGAACATAG  
GTGGGCCGATAGGTGG---TTCAAGAGGAGGTGGACTTCCATCGCTGACAGATACCTTTG  
AGCAGTTATAGAGGAACTCCTGGAAGAGGAACAGACCATGAGGCAGAGTGAAGAGAACA  
AGGAC---GACATGTATTCATCTAGAGTAATGCTGAGCACTCAAGTGCCTTTGGAGCCAC  
CTTTGCTTTTTCTCCTTGAGGAGTACAAAACTACTTGGATGCTGCAAACATGTCCATGA  
GGGTGAGGCGCCACTCTGACCCCGCTCGGCGCGGGGAACTGAGCGTCTGTGACAGTATTA  
GTGAATGGGTGACTGCGGCCGACAAGAAAACTGCAGTGGACATGGCGGGGCAAACGGTTA  
CTGTTCTGGAAAAAGTCCCGGTACCCAAAGGTCAACTGAAACAATATTTCTATGAGACCA  
AATGCAATCCTATGGGCTACATGAAGGAAGGTTGCAGGGGCATTGATAAAAAGGTACTGGA  
ACTCGCAATGCCGAACTACCCAGTCTTATGTGCGTGCGCTCACCATGGATAGCAAAAAAA  
AAGTGGGCTGGCGCTTTATAAGGATAGACACTTCTTGTGTATGTACTGACCATTAAA-

>M. irrawaddy MN534403

--ATGGTTATTTCATACTTAAGTTGCATGAAAGCTGCCCAATGAAAGAAGCCAATGTCA  
GAGGACAAAGTGGCCTGGCTTATCCGGGTCTCCGGACCCACGGTACTCTGGAGAACATAG  
GTGGGCCGATAGGTGG---TTCAAGAGGAGGTGGACTTCCATCGCTGACAGATACCTTTG  
AGCAAGTCATAGAGGAACTCCTAGAAGAGGAACAGACCATGAGGCAGAGTGAAGAGAACA  
AGGAC---GACATGTATTCATCTAGAGTCATGCTGAGCACTCAAGTGCCTTTGGAGCCAC  
CTTTGCTTTTTCTCCTTGAGGAGTACAAAACTACTTGGATGCTGCAAACATGTCCATGA  
GGGTGAGGCGCCACTCTGACCCCGCTCGGCGCGGGGAACTGAGCGTCTGTGACAGTATTA

GCGAATGGGTGACTGCGGCCGACAAGAAAACCTGCAGTGGACATGGCGGGGCAAACGGTTA  
CTGTTCTGGAAAAAGTCCCAGTACCCAAAGGTCAACTGAAACAATATTTCTATGAGACCA  
AATGCAATCCTATGGGCTACATGAAGGAAGGTTGCAGGGGCATTGACAAAAGGTACTGGA  
ACTCGCAATGCCGAACCTACCCAGTCTTATGTGCGTGCGCTCACCATGGATAGCAAAAAAA  
AAGTTGGCTGGCGCTTTATAAGGATAGACACTTCTTGTGTATGTACACTGACCATTAAA-

>M. heymonsi MN534404

CTATGGTTATTTTCATACTTAAGTTGCATGAAAGCTGCCCAATGAAAGAAGCCAATGTCA  
GAGGACAAAGTGGCCTGGCTTATCCGGGTCTTCGGACCCACGGTACTCTGGAGAACATAG  
GTGGGCCGATAGGTGG---TTCAAGAGGAGGTGGACTTCCATCGCTGACAGATACCTTTG  
AGCAGGTTATAGAGGAACTCCTAGAAGAGGAACAGACCATGAGGCAGAGTGAAGAGAACA  
AGGAC---GACATGTATTCATCTAGAGTAATGCTGAGCACTCAAGTGCCTTTGGAGCCAC  
CTTTGCTTTTTTCTCCTTGAGGAGTACAAAACTACTTGGATGCTGCAAACATGTCCATGA  
GGGTGAGGCGCCACTCCGACCCCGCTCGGCGCGGGGAACTGAGCGTCTGTGACAGTATTA  
GTGAATGGGTGACTGCGGCCGACAAGAAAACCTGCAGTGGACATGGCGGGGCAAACGGTTA  
CTGTTCTGGAAAAAGTCCCAGTACCCAAAGGTCAACTGAAACAATATTTCTATGAGACCA  
AATGCAATCCTATGGGCTACATGAAGGAAGGTTGCAGGGGCATTGACAAAAGGTACTGGA  
ACTCGCAATGCCGAACCTACCCAGTCTTATGTGCGTGCGCTCACCATGGATAGCAAAAAAA  
AAGTTGGCTGGCGCTTTATAAGGATAGACACTTCTTGTGTATGTACACTGACCATTAAA-

>M. heymonsi MN534405

CTATGGTTATTTTCATACTTAAGTTGCATGAAAGCTGCCCAATGAAAGAAGCCAATGTCA  
GAGGACAAAGTGGCCTGGCTTATCCGGGTCTTCGGACCCACGGTACTCTGGAGAACATAG  
GTGGGCCGATAGGTGG---TTCAAGAGGAGGTGGACTTCCATCGCTGACAGATACCTTTG  
AGCAGGTTATAGAGGAACTCCTAGAAGAGGAACAGACCATGAGGCAGAGTGAAGAGAACA  
AGGAC---GACATGTATTCATCTAGAGTAATGCTGAGCACTCAAGTGCCTTTGGAGCCAC  
CTTTGCTTTTTTCTCCTTGAGGAGTACAAAACTACTTGGATGCTGCAAACATGTCCATGA  
GGGTGAGGCGCCACTCCGACCCCGCTCGGCGCGGGGAACTGAGCGTCTGTGACAGTATTA  
GTGAATGGGTGACTGCGGCCGACAAGAAAACCTGCAGTGGACATGGCGGGGCAAACGGTTA  
CTGTTCTGGAAAAAGTCCCAGTACCCAAAGGTCAACTGAAACAATATTTCTATGAGACCA

AATGCAATCCTATGGGCTACATGAAGGAAGGTTGCAGGGGCATTGACAAAAGGTACTGGA  
ACTCGCAATGCCGAAC TACCCAGTCTTATGTGCGTGCGCTCACCATGGATAGCAAAAAA  
AAGTTGGCTGGCGCTTTATAAGGATAGACACTTCTTGTGTATGTACTGACCATTAAA-

>M. heymonsi MN534406

CTATGGTTATTTTCATACTTAAGTTGCATGAAAGCTGCCCAATGAAAGAAGCCAATGTCA  
GAGGACAAAGTGGCCTGGCTTATCCGGGTCTTCGGACCCACGGTACTCTGGAGAACATAG  
GTGGGCCGATAGGTGG---TTCAAGAGGAGGTGGACTTCCATCGCTGACAGATACCTTTG  
AGCAGGTTATAGAGGAACCTTAGAAGAGGAACAGACCATGAGGCAGAGTGAAGAGAACA  
AGGAC---GACATGTATTCATCTAGAGTAATGCTGAGCACTCAAGTGCCTTTGGAGCCAC  
CTTTGCTTTTTCTCCTTGAGGAGTACAAAACTACTTGGATGCTGCAAACATGTCCATGA  
GGGTGAGGCGCCACTCCGACCCCGCTCGGCGCGGGGAACTGAGCGTCTGTGACAGTATTA  
GTGAATGGGTGACTGCGGCCGACAAGAAAAC TGCAGTGGACATGGCGGGGCAAACGGTTA  
CTGTTCTGGAAAAAGTCCAGTACCCAAAGGTCAACTGAAACAATATTTCTATGAGACCA  
AATGCAATCCTATGGGCTACATGAAGGAAGGTTGCAGGGGCATTGACAAAAGGTACTGGA  
ACTCGCAATGCCGAAC TACCCAGTCTTATGTGCGTGCGCTCACCATGGATAGCAAAAAA  
AAGTTGGCTGGCGCTTTATAAGGATAGACACTTCTTGTGTATGTACTGACCATTAAA-

>M. heymonsi MN534407

CTATGGTTATTTTCATACTTAAGTTGCATGAAAGCTGCCCAATGAAAGAAGCCAATGTCA  
GAGGACAAAGTGGCCTGGCTTATCCGGGTCTTCGGACCCACGGTACTCTGGAGAACATAG  
GTGGGCCGATAGGTGG---TTCAAGAGGAGGTGGACTTCCATCGCTGACAGATACCTTTG  
AGCAGGTTATAGAGGAACCTTAGAAGAGGAACAGACCATGAGGCAGAGTGAAGAGAACA  
AGGAC---GACATGTATTCATCTAGAGTAATGCTGAGCACTCAAGTGCCTTTGGAGCCAC  
CTTTGCTTTTTCTCCTTGAGGAGTACAAAACTACTTGGATGCTGCAAACATGTCCATGA  
GGGTGAGGCGCCACTCCGACCCCGCTCGGCGCGGGGAACTGAGCGTCTGTGACAGTATTA  
GTGAATGGGTGACTGCGGCCGACAAGAAAAC TGCAGTGGACATGGCGGGGCAAACGGTTA  
CTGTTCTGGAAAAAGTTCAGTACCCAAAGGTCAACTGAAACAATATTTCTATGAGACCA  
AATGCAATCCTATGGGCTACATGAAGGAAGGTTGCAGGGGCATTGACAAAAGGTACTGGA  
ACTCGCAATGCCGAAC TACCCAGTCTTATGTGCGTGCGCTCACCATGGATAGCAAAAAA

AAGTTGGCTGGCGCTTTATAAGGATAGACACTTCTTGTGTATGTACACTGACCATTAAA-

>M. heymonsi MN534408

CTATGGTTATTTTATACTTAAGTTGCATGAAAGCTGCCCAATGAAAGAAGCCAATGTCA  
GAGGACAAAGTGGCCTGGCTTATCCGGGTCTTCGGACCCACGGTACTCTGGAGAACATAG  
GTGGGCCGATAGGTGG---TTCAAGAGGAGGTGGACTTCCATCGCTGACAGATACCTTTG  
AGCAGGTTATAGAGGAACTCCTAGAAGAGGAACAGACCATGAGGCAGAGTGAAGAGAACA  
AGGAC---GACATGTATTCATCTAGAGTAATGCTGAGCACTCAAGTGCCTTTGGAGCCAC  
CTTTGCTTTTTTCTCCTTGAGGAGTACAAAACTACTTGGATGCTGCAAACATGTCCATGA  
GGGTGAGGCGCCACTCTGACCCCGCTCGGCGCGGGGAACTGAGCGTCTGTGACAGTATTA  
GTGAATGGGTGACTGCGGCCGACAAGAAAACTGCAGTGGACATGGCGGGGCAAACGGTTA  
CTGTTCTGGAAAAAGTCCCTGTACCCAAAGGTCAACTGAAACAATATTTCTATGAGACCA  
AATGCAATCCTATGGGCTACATGAAGGAAGGTTGCAGGGGCATTGACAAAAGGTACTGGA  
ACTCGCAATGCCGAACTACCCAGTCTTATGTGCGTGCGCTCACCATGGATAGCAAAAAAA  
AAGTTGGCTGGCGCTTTATAAGGATAGACACTTCTTGTGTATGTACACTGACCATTAAA-

>M. heymonsi MN534409

CTATGGTTATTTTATACTTAAGTTGCATGAAAGCTGCCCAATGAAAGAAGCCAATGTCA  
GAGGACAAAGTGGCCTGGCTTATCCGGGTCTTCGGACCCACGGTACTCTGGAGAACATAG  
GTGGGCCGATAGGTGG---TTCAAGAGGAGGTGGACTTCCATCGCTGACAGATACCTTTG  
AGCAGGTTATAGAGGAACTCCTAGAAGAGGAACAGACCATGAGGCAAAAGTGAAGAGAACA  
AGGAC---GACATGTATTCATCTAGAGTAATGCTGAGCACTCAAGTGCCTTTGGAGCCAC  
CTTTGCTTTTTTCTCCTTGAGGAGTACAAAACTACTTGGATGCTGCAAACATGTCCATGA  
GGGTGAGGCGCCACTCCGACCCCGCTCGGCGCGGGGAACTGAGCGTCTGTGACAGTATTA  
GTGAATGGGTGACTGCGGCCGACAAGAAAACTGCAGTGGACATGGCGGGGCAAACGGTTA  
CTGTTCTGGAAAAAGTCCAGTACCCAAAGGTCAACTGAAACAATATTTCTATGAGACCA  
AATGCAATCCTATGGGCTACATGAAGGAAGGTTGCAGGGGCATTGACAAAAGGTACTGGA  
ACTCGCAATGCCGAACTACCCAGTCTTATGTGCGTGCGCTCACCATGGATAGCAAAAAAA  
AAGTTGGCTGGCGCTTTATAAGGATAGACACTTCTTGTGTATGTACACTGACCATTAAA-



>M. heymonsi MN534410

CTATGGTTATTTTCATACTTAAGTTGCATGAAAGCTGCCCAATGAAAGAAGCCAATGTCA  
GAGGACAAAGTGGCCTGGCCTATCCGGGTCTTCGGACCCACGGTACTCTGGAGAACATAG  
GTGGGCCGATAGGTGG---TTCAAGAGGAGGTGGACTTCCATCGCTGACAGATACCTTTG  
AGCAGGTTATAGAGGAACTCCTAGAAGAGGAACAGACCATGAGGCAGAGTGAAGAGAACA  
AGGAC---GACATGTATTCATCTAGAGTAATGCTGAGCACTCAAGTGCCTTTGGAGCCAC  
CTTTGCTTTTTCTCCTTGAGGAGTACAAAACTACTTGGATGCTGCAAACATGTCCATGA  
GGGTGAGGCGCCACTCCGACCCCGCTCGGCGCGGGGAACTGAGCGTCTGTGACAGTATTA  
GTGAATGGGTGACTGCGGCCGACAAGAAAACTGCAGTGGACATGGCGGGGCAAACGGTTA  
CTGTTCTGGAAAAAGTCCCAGTACCCAAAGGTCAACTGAAACAATATTTCTATGAGACCA  
AATGCAATCCTATGGGCTACATGAAGGAAGGTTGCAGGGGCATTGACAAAAGGTACTGGA  
ACTCGCAATGCCGAACTACCCAGTCTTATGTGCGTGCGCTCACCATGGATAGCAAAAAAA  
AAGTTGGCTGGCGCTTTATAAGGATAGACACTTCTTGTGTATGTACTGACCATTAAAA

>M. mukhlesuri MN534411

--ATGGTTATTTTCATACTTAAGTTGCATGAAAGCTGCCCAATGAAAGAAGCCAATGTCA  
GAGGACAAAGTGGCCTGGCTTATCCGGGTCTTCGGACCCACGGTACTCTGGAGAACATAG  
GTGGGCCGATAGGTGG---TTCACGAGGAGGTGGACTTCCATCGCTGACAGACACCTTTG  
AGCAGGTAATAGAGGAACTCCTAGAAGAGGAACAGACCATGAGGCAGAGTGAAGAGAACA  
AGGAC---GACATGTATACATCTAGAGTCATGCTGAGCACTCAAGTGCCTTTGGAGCCAC  
CTTTGCTTTTTCTTCTTGGAGGAGTACAAAACTACTTGGATGCTGCAAACATGTCCATGA  
GGGTGAGGCGCCACTCTGACCCGGCTCGGCGCGGGGAACTGAGCGTCTGTGACAGTATTA  
GCGAATGGGTGACTGCGGCCGACAAGAAAACTGCAGTGGACATGGCGGGGCAAACGGTTA  
CCGTTCTGGAAAAAGTCCCAGTACCCAAAGGTCAACTGAAACAATATTTCTATGAGACCA  
AATGCAATCCTATGGGCTACATGAAGGATGGTTGCAGGGGCATTGACAAAAGGTACTGGA  
ACTCGCAATGCCGAACTACCCAGTCTTATGTGCGTGCGCTCACCATGGATAGCAAAAAAA  
AAGTGGGCTGGCGCTTTATAAGGATAGACACTTCTTGTGTATGTACTGACCATTAAA-

>M. mukhlesuri MN534412

--ATGGTTATTTTCATACTTAAGTTGCATGAAAGCTGCCCAATGAAAGAAGCCAATGTCA

GAGGACAAAGTGGCCTGGCTTATCCGGGTCTTCGGACCCACGGTACTCTGGAGAACATAG  
GTGGGCCGATAGGTGG---TTCACGAGGAGGTGGACTTCCATCGCTGACAGACACCTTTG  
AGCAGGTAATAGAGGAACTCCTAGAAGAGGAACAGACCATGAGGCAGAGTGAAGAGAACA  
AGGAC---GACATGTATACATCTAGAGTCATGCTGAGCACTCAAGTGCCTTTGGAGCCAC  
CTTTGCTTTTTCTTCTTGAGGAGTACAAAACTACTTGGATGCTGCAAACATGTCCATGA  
GGGTGAGGCGCCACTCTGACCCGGCTCGGCGCGGGGAACTGAGCGTCTGTGACAGTATTA  
GCGAATGGGTGACTGCGGCCGACAAGAAAACCTGCAGTGGACATGGCGGGGCAAACGGTTA  
CCGTTCTGGAAAAAGTCCCAGTACCCAAAGGTCAACTGAAACAATATTTCTATGAGACCA  
AATGCAATCCTATGGGCTACATGAAGGATGGTTGCAGGGGCATTGACAAAAGGTACTGGA  
ACTCGCAATGCCGAACTACCCAGTCTTATGTGCGTGCGCTCACCATGGATAGCAAAAAAA  
AAGTGGGCTGGCGCTTTATAAGGATAGACACTTCTTGTGTATGTACTGACCATTAAA-

>M. mukhlesuri MN534413

--ATGGTTATTTTATACTTAAGTTGCATGAAAGCTGCCCAATGAAAGAAGCCAATGTCA  
GAGGACAAAGTGGCCTGGCTTATCCGGGTCTTCGGACCCACGGTACTCTGGAGAACATAG  
GTGGGCCGATAGGTGG---TTCACGAGGAGGTGGACTTCCATCACTGACAGACACCTTTG  
AGCAGGTAATAGAGGAACTCCTAGAAGAGGAACAGACCATGAGGCAGAGTGAAGAGAACA  
AGGAC---GACATGTATACATCTAGAGTCATGCTGAGCACTCAAGTGCCTTTGGAGCCAC  
CTTTGCTTTTTCTTCTTGAGGAGTACAAAACTACTTGGATGCTGCAAACATGTCCATGA  
GGGTGAGGCGCCACTCTGACCCGGCTCGGCGCGGGGAACTGAGCGTCTGTGACAGTATTA  
GCGAATGGGTGACTGCGGCCGACAAGAAAACCTGCAGTGGACATGGCGGGGCAAACGGTTA  
CCGTTCTGGAAAAAGTCCCAGTACCCAAAGGTCAACTGAAACAATATTTCTATGAGACCA  
AATGCAATCCTATGGGCTACATGAAGGATGGTTGCAGGGGCATTGACAAAAGGTACTGGA  
ACTCGCAATGCCGAACTACCCAGTCTTATGTGCGTGCGCTCACCATGGATAGCAAAAAAA  
AAGTGGGCTGGCGCTTTATAAGGATAGACACTTCTTGTGTATGTACTGACCATTAAA-

>M. mukhlesuri MN534414

--ATGGTTATTTTATACTTAAGTTGCATGAAAGCTGCCCAATGAAAGAAGCCAATGTCA  
GAGGACAAAGTGGCCTGGCTTATCCGGGTCTTCGGACCCACGGTACTCTGGAGAACATAG  
GTGGGCCGATAGGTGG---TTCACGAGGAGGTGGACTTCCATCGCTGACAGACACCTTTG

AGCAGGTAATAGAGGAACTCCTAGAAGAGGAACAGACCATGAGGCAGAGTGAAGAGAACA  
AGGAC---GACATGTATACATCTAGAGTCATGCTGAGCACTCAAGTGCCTTTGGAGCCAC  
CTTTGCTTTTTCTTCTTGAGGAGTACAAAACTACTTGGATGCTGCAAACATGTCCATGA  
GGGTGAGGCGCCACTCTGACCCGGCTCGGCGCGGGGAACTGAGCGTCTGTGACAGTATTA  
GCGAATGGGTGACTGCGGCCGACAAGAAAACTGCAGTGGACATGGCGGGGCAAACGGTTA  
CCGTTCTGGAAAAAGTCCCAGTACCCAAAGGTCAACTGAAACAATATTTCTATGAGACCA  
AATGCAATCCTATGGGCTACATGAAGGATGGTTGCAGGGGCATTGACAAAAGGTACTGGA  
ACTCGCAATGCCGAACTACCCAGTCTTATGTGCGTGCGCTCACCATGGATAGCAAAAAAA  
AAGTGGGCTGGCGCTTTATAAGGATAGACACTTCTTGTGTATGTACTGACCATTAAA-

>M. mukhlesuri MN534415

--ATGGTTATTTCTATACTTAAGTTGCATGAAAGCTGCCCAATGAAAGAAGCCAATGTCA  
GAGGACAAAGTGGCCTGGCTTATCCGGGTCTTCGGACCCACGGTACTCTGGAGAACATAG  
GTGGGCCGATAGGTGG---TTCACGAGGAGGTGGACTTCCATCGCTGACAGATACCTTTG  
AGCAGGTAATAGAGGAACTCCTAGAAGAGGAACAGACCATGAGGCAGAGTGAAGAGAACA  
AGGAC---GACATGTATACATCTAGAGTCATGCTGAGCACTCAAGTGCCTTTGGAGCCAC  
CTTTGCTTTTTCTTCTTGAGGAGTACAAAACTACTTGGATGCTGCAAACATGTCCATGA  
GGGTGAGGCGCCACTCTGACCCGGCTCGGCGCGGGGAACTGAGCGTCTGTGACAGTATTA  
GCGAATGGGTGACTGCGGCCGACAAGAAAACTGCAGTGGACATGGCGGGGCAAACGGTTA  
CCGTTCTGGAAAAAGTCCCAGTACCCAAAGGTCAACTGAAACAATATTTCTATGAGACCA  
AATGCAATCCTATGGGCTACATGAAGGATGGTTGCAGGGGCATTGACAAAAGGTACTGGA  
ACTCGCAATGCCGAACTACCCAGTCTTATGTGCGTGCGCTCACCATGGATAGCAAAAAAA  
AAGTGGGCTGGCGCTTTATAAGGATAGACACTTCTTGTGTATGTACTGACCATTAAA-

>M. mukhlesuri MN534416

--ATGGTTATTTCTATACTTAAGTTGCATGAAAGCTGCCCAATGAAAGAAGCCAATGTCA  
GAGGACAAAGTGGCCTGGCTTATCCGGGTCTTCGGACCCACGGTACTCTGGAGAACATAG  
GTGGGCCGATAGGTGG---TTCACGAGGAGGTGGACTTCCATCGCTGACAGATACCTTTG  
AGCAGGTAATAGAGGAACTCCTAGAAGAGGAACAGACCATGAGGCAGAGTGAAGAGAACA  
AGGAC---GACATGTATACATCTAGAGTCATGCTGAGCACTCAAGTGCCTTTGGAGCCAC

CTTTGCTTTTTCTTCTTGAGGAGTACAAAACTACTTGGATGCTGCAAACATGTCCATGA  
GGGTGAGGCGCCACTCTGACCCGGCTCGGCGCGGGGAACTGAGCGTCTGTGACAGTATTA  
GCGAATGGGTGACTGCGGCCGACAAGAAAACTGCAGTGGACATGGCGGGGCAAACGGTTA  
CCGTTCTGGAAAAAGTCCCAGTACCCAAAGGTCAACTGAAACAATATTTCTATGAGACCA  
AATGCAATCCTATGGGCTACATGAAGGATGGTTGCAGGGGCATTGACAAAAGGTACTGGA  
ACTCGCAATGCCGAACTACCCAGTCTTATGTGCGTGCGCTCACCATGGATAGCAAAAAAA  
AAGTGGGCTGGCGCTTTATAAGGATAGACACTTCTTGTGTATGTACACTGACCATTAAA-

>M. mukhlesuri MN534417

--ATGGTTATTTTCATACTTAAGTTGCATGAAAGCTGCCCAATGAAAGAAGCCAATGTCA  
GAGGACAAAGTGGCCTGGCTTATCCGGGTCTTCGGACCCACGGTACTCTGGAGAACATAG  
GTGGGCCGATAGGTGG---TTCACGAGGAGGTGGACTTCCATCGCTGACAGATACCTTTG  
AGCAGGTAATAGAGGAACTCCTAGAAGAGGAACAGACCATGAGGCAGAGTGAAGAGAACA  
AGGAC---GACATGTATACATCTAGAGTCATGCTGAGCACTCAAGTGCCTTTGGAGCCAC  
CTTTGCTTTTTCTTCTTGAGGAGTACAAAACTACTTGGATGCTGCAAACATGTCCATGA  
GGGTGAGGCGCCACTCTGACCCGGCTCGGCGCGGGGAACTGAGCGTCTGTGACAGTATTA  
GCGAATGGGTGACTGCGGCCGACAAGAAAACTGCAGTGGACATGGCGGGGCAAACGGTTA  
CCGTTCTGGAAAAAGTCCCAGTACCCAAAGGTCAACTGAAACAATATTTCTATGAGACCA  
AATGCAATCCTATGGGCTACATGAAGGATGGTTGCAGGGGCATTGACAAAAGGTACTGGA  
ACTCGCAATGCCGAACTACCCAGTCTTATGTGCGTGCGCTCACCATGGATAGCAAAAAAA  
AAGTGGGCTGGCGCTTTATAAGGATAGACACTTCTTGTGTATGTACACTGACCATTAAA-

>M. mukhlesuri MN534418

--ATGGTTATTTTCATACTTAAGTTGCATGAAAGCTGCCCAATGAAAGAAGCCAATGTCA  
GAGGACAAAGTGGCCTGGCTTATCCGGGTCTTCGGACCCACGGTACTCTGGAGAACATAG  
GTGGGCCGATAGGTGG---TTCACGAGGAGGTGGACTTCCATCGCTGACAGATACCTTTG  
AGCAGGTAATAGAGGAACTCCTAGAAGAGGAACAGACCATGAGGCAGAGTGAAGAGAACA  
AGGAC---GACCTGTATACATCTAGAGTCATGCTGAGCACTCAAGTGCCTTTGGAGCCAC  
CTTTGCTTTTTCTTCTTGAGGAGTACAAAACTACTTGGATGCTGCAAACATGTCCATGA  
GGGTGAGGCGCCACTCTGACCCGGCTCGGCGCGGGGAACTGAGCGTCTGTGACAGTATTA

GCGAATGGGTGACTGCGGCCGACAAGAAAACCTGCAGTGGACATGGCGGGGCAAACGGTTA  
CCGTTCTGGAAAAAGTCCCAGTACCCAAAGGTCAACTGAAACAATATTTCTATGAGACCA  
AATGCAATCCTATGGGCTACATGAAGGATGGTTGCAGGGGCATTGACAAAAGGTACTGGA  
ACTCGCAATGCCGAACCTACCCAGTCTTATGTGCGTGCGCTCACCATGGATAGCAAAAAAA  
AAGTGGGCTGGCGCTTTATAAGGATAGACACTTCTTGTGTATGTACACTGACCATTAAA-

>M. fissipes MN534419

--ATGGTTATTTTCATACTTAAGTTGCATGAAAGCTGCCCAATGAAAGAAGCCAATGTCA  
GAGGACAAAGTGGCCTGGCTTATCCGGGTCTTCGGACCCACGGTACTTTGGAGAACATAG  
GTGGGCCGATAGGTGG---TTCACGAGGAGGTGGACTTCCATCGCTGACAGACACCTTTG  
AGCAGGTAATAGAGGAACTCCTAGAAGAGGAACAGACCATGAGGCAGAGTGAAGAGAACA  
AGGAC---GACATGTATACATCTAGAGTCATGCTGAGCACTCAAGTGCCTTTGGAGCCAC  
CTTTGCTTTTTCTTCTTGAGGAGTACAAAACTACTTGGATGCTGCAAACATGTCCATGA  
GGGTGAGGCGCCACTCTGACCCGGCTCGGCGCGGGGAACTGAGCGTCTGTGACAGTATTA  
GCGAATGGGTGACTGCGGCCGACAAGAAAACCTGCAGTGGACATGGCGGGGCAAACAGTTA  
CCGTTCTGGAAAAAGTCCCAGTACCCAAAGGTCAACTGAAACAATATTTCTATGAGACCA  
AATGCAATCCTATGGGCTACATGAAGGATGGTTGCAGGGGCATTGACAAAAGGTACTGGA  
ACTCGCAATGCCGAACCTACCCAGTCTTATGTGCGTGCGCTCACCATGGATAGCAAAAAAA  
AAGTGGGCTGGCGCTTTATAAGGATAGACACTTCTTGTGTATGTACACTGACCATTAAA-

>M. fissipes MN534420

--ATGGTTATTTTCATACTTAAGTTGCATGAAAGCTGCCCAATGAAAGAAGCCAATGTCA  
GAGGACAAAGTGGCCTGGCTTATCCGGGTCTTCGGACCCACGGTACTCTGGAGAACATAG  
GTGGGCCGATAGGTGG---TTCACGAGGAGGTGGACTTCCATCGCTGACAGACACCTTTG  
AGCAGGTAATAGAGGAACTCCTAGAAGAGGAACAGACCATGAGGCAGAGTGAAGAGAACA  
AGGAC---GACATGTATACATCTAGAGTCATGCTGAGCACTCAAGTGCCTTTGGAGCCAC  
CTTTGCTTTTTCTTCTTGAGGAGTACAAAACTACTTGGATGCTGCAAACATGTCCATGA  
GGGTGAGGCGCCACTCTGACCCGGCTCGGCGCGGGGAACTGAGCGTCTGTGACAGTATTA  
GCGAATGGGTGACTGCGGCCGACAAGAAAACCTGCAGTGGACATGGCGGGGCAAACAGTTA  
CCGTTCTGGAAAAAGTCCCAGTACCCAAAGGTCAACTGAAACAATATTTCTATGAGACCA

AATGCAATCCTATGGGCTACATGAAGGATGGTTGCAGGGGCATTGACAAAAGGTACTGGA  
ACTCGCAATGCCGAACTACCCAGTCTTATGTGCGTGCGCTCACCATGGATAGCAAAAAAA  
AAGTGGGCTGGCGCTTTATAAGGATAGACACTTCTTGTGTATGTACTGACCATTAAA-

>M. chakrapanii MN534421

--ATGGTTATTTTCATACTTAAGTTGCATGAAAGCTGCCCAATGAAAGAAGCCAATGTCA  
GAGGACAAAGTGGCCTGGCTTATCCGGGTCTTCGGACCCACGGTACTCTGGAGAACATAG  
GTGGGCCGATAGGTGG---TTCACGAGGAGGTGGACTTCCATCGCTGACAGACACCTTTG  
AGCAGGTAATAGAGGAACTTCTAGAAGAGGAACAGACCATGAGGCAGAGTGAAGAGAACA  
AGGAC---GACATGTATACATCTAGAGTCATGCTGAGCACTCAAGTGCCTTTGGAGCCAC  
CTTTGCTTTTTCTTCTTGAGGAGTACAAAACTACTTGGATGCTGCAAACATGTCCATGA  
GGGTGAGGCGCCACTCCGACCCGGCTCGGCGCGGGGAACTGAGCGTCTGTGACAGTATTA  
GCGAATGGGTGACTGCGGCCGACAAGAAAACCTGCAGTGGACATGGCGGGGCAAACGGTTA  
CCGTTCTGGAAAAAGTCCCAGTACCCAAAGGTCAACTGAAACAATATTTCTATGAGACCA  
AATGCAATCCTATGGGCTACATGAAGGATGGTTGCAGGGGCATTGACAAAAGGTACTGGA  
ACTCGCAATGCCGAACTACCCAGTCTTATGTGCGTGCGCTCACCATGGATAGCAAAAAAA  
AAGTGGGCTGGCGCTTTATAAGGATAGACACTTCTTGTGTATGTACTGACCATTAAA-

>M. chakrapanii MN534422

--ATGGTTATTTTCATACTTAAGTTGCATGAAAGCTGCCCAATGAAAGAAGCCAATGTCA  
GAGGACAAAGTGGCCTGGCTTATCCGGGTCTTCGGACCCACGGTACTCTGGAGAACATAG  
GTGGGCCGATAGGTGG---TTCACGAGGAGGTGGACTTCCATCGCTGACAGACACCTTTG  
AGCAGGTAATAGAGGAACTTCTAGAAGAGGAACAGACCATGAGGCAGAGTGAAGAGAACA  
AGGAC---GACATGTATACATCTAGAGTCATGCTGAGCACTCAAGTGCCTTTGGAGCCAC  
CTTTGCTTTTTCTTCTTGAGGAGTACAAAACTACTTGGATGCTGCAAACATGTCCATGA  
GGGTGAGGCGCCACTCCGACCCGGCTCGGCGCGGGGAACTGAGCGTCTGTGACAGTATTA  
GCGAATGGGTGACTGCGGCCGACAAGAAAACCTGCAGTGGACATGGCGGGGCAAACGGTTA  
CCGTTCTGGAAAAAGTCCCAGTACCCAAAGGTCAACTGAAACAATATTTCTATGAGACCA  
AATGCAATCCTATGGGCTACATGAAGGATGGTTGCAGGGGCATTGACAAAAGGTACTGGA  
ACTCGCAATGCCGAACTACCCAGTCTTATGTGCGTGCGCTCACCATGGATAGCAAAAAAA

AAGTGGGCTGGCGCTTTATAAGGATAGACACTTCTTGTGTATGTACACTGACCATTAAA-

>M. mymensinghensis MN534423

--ATGGTTATTTTCATACTTAAGTTGCATGAAAGCTGCCCAATGAAAGAAGCCAATGTCA  
GAGGACAAAGTGGCCTGGCTTATCCGGGTCTTCGGACCCACGGTACTCTGGAGAACATAG  
GTGGGCCAATAGGTGG---TTCACGAGGCGGTGGACTTCCATCGCTGACAGACACCTTTG  
AGCAGGTAATAGAGGAACTTCTAGAAGAGGAACAGACCATGAGGCAGAGTGAAGAGAACA  
AGGAC---GACATGTATACATCTAGAGTCATGCTGAGCACTCAAGTGCCTTTGGAGCCAC  
CTTTGCTTTTTCTTCTTGAGGAGTACAAAACTACTTGGATGCTGCAAACATGTCCATGA  
GGGTGAGGCGCCACTCCGACCCGGCTCGGCGCGGGGAACTGAGCGTCTGTGACAGTATTA  
GCGAATGGGTGACTGCGGCCGACAAGAAAACCTGCAGTGGACATGGCGGGGCAAACGGTTA  
CCGTTCTGGAAAAGTCCCAGTACCCAAAGGTCAACTGAAACAATATTTCTATGAGACCA  
AATGCAATCCTATGGGCTACATGAAGGATGGTTGCAGGGGCATTGACAAAAGGTACTGGA  
ACTCGCAATGCCGAACTACCCAGTCTTATGTGCGTGCGCTCACCATGGATAGCAAAAAAA  
AAGTGGGCTGGCGCTTTATAAGGATAGACACTTCTTGTGTATGTACACTGACCATTAAA-

>Microhyla sp. 3 MN534424

-----GCTGCCCAATGAAAGAAGCCAATGTCA  
GAGGACAAAGTGGCCTGGCTTATCCGGGTCTTCGGACCCACGGTACTCTGGAGAACATAG  
GTGGGCCGATAGGTGG---TTCAAGAGGAGGTGGACTTCCATCGCTGACAGATACCTTTG  
AGCAGGTTATAGAGGAACTCCTAGAAGAGGAACAGACCATGAGGCAGAGTGAAGAGAACA  
AGGAC---GACATGTATTTCATCTAGAGTAATGCTGAGCACTCAAGTGCCTTTGGAGCCAC  
CATTGCTTTTTCTCCTTGAGGAGTACAAAACTACTTGGATGCTGCAAACATGTCCATGA  
GGGTGAGGCGCCACTCCGACCCCGCTCGGCGCGGGGAACTGAGCGTCTGTGACAGTATTA  
GCGAATGGGTGACTGCGGCCGACAAGAAAACCGCAGTGGACATGGCGGGGCAAACGGTTA  
CTGTTCTGGAAAAGTCCCAGTACCCAAAGGTCAACTGAAACAATATTTCTATGAGACCA  
AATGCAATCCTATGGGCTACATGAAGGAAGTTGCAGGGGCATTGACAAAAGGTACTGGA  
ACTCGCAATGCCGAACTACCCAGTCTTATGTGCGTGCGCTCACCATGGATAGCAAAAAAA  
AAGTTGGCTGGCGCTTTATAAGGATAGACACTTCTTGTGTATGTACACTGACCATTAAAA

>Microhyla sp. 3 MN534425

-----GCTGCCCAATGAAAGAAGCCAATGTCA  
GAGGACAAAGTGGCCTGGCTTATCCGGGTCTTCGGACCCACGGTACTCTGGAGAACATAG  
GTGGGCCGATAGGTGG---TTCAAGAGGAGGTGGACTTCCATCGCTGACAGATACCTTTG  
AGCAGGTTATAGAGGAACTCCTAGAAGAGGAACAGACCATGAGGCAGAGTGAAGAGAACA  
AGGAC---GACATGTATTCATCTAGAGTAATGCTGAGCACTCAAGTGCCTTTGGAGCCAC  
CATTGCTTTTTCTCCTTGAGGAGTACAAAACTACTTGGATGCTGCAAACATGTCCATGA  
GGGTGAGGCGCCACTCCGACCCCGCTCGGCGCGGGGAACTGAGCGTCTGTGACAGTATTA  
GCGAATGGGTGACTGCGGCCGACAAGAAAACCGCAGTGGACATGGCGGGGCAAACGGTTA  
CTGTTCTGGAAAAAGTCCCAGTACCCAAAGGTCAACTGAAACAATATTTCTATGAGACCA  
AATGCAATCCTATGGGCTACATGAAGGAAGGTTGCAGGGGCATTGACAAAAGGTACTGGA  
ACTCGCAATGCCGAACTACCCAGTCTTATGTGCGTGCCTCACCATGGATAGCAAAAAAA  
AAGTTGGCTGGCGCTTTATAAGGATAGACACTTCTTGTGTATGTACTGACCATTAAAA

>M. okinavensis MN534426

--ATGGTTATTTTATACTTAAGTTGCATGAAAGCTGCCCAATGAAAGAAGCCAATGTCA  
GAGGACAAAGTGGCCTGGCTTATCCGGGTCTTCGGACCCACGGTACTCTGGAGAACATAG  
GTGGGCCGATAGGTGG---TTCAAGAGGAGGTGGACTTCCATCGCTGACAGATACCTTTG  
AGCAGGTTATAGAGGAACTCCTAGAAGAGGAACAGACCATGAGGCAGAGTGAAGAGAACA  
AGGAC---GACATGTATTCATCTAGAGTAATGCTGAGCACTCAAGTGCCTTTGGAGCCAC  
CATTGCTTTTTCTCCTTGAGGAGTACAAAACTACTTGGATGCTGCAAACATGTCCATGA  
GGGTGAGGCGCCACTCCGACCCCGCTCGGCGCGGGGAACTGAGCGTCTGTGACAGTATTA  
GCGAATGGGTGACTGCGGCCGACAAGAAAACCGCAGTGGACATGGCGGGGCAAACGGTTA  
CTGTTCTGGAAAAAGTCCCAGTACCCAAAGGTCAACTGAAACAATATTTCTATGAGACCA  
AATGCAATCCTATGGGCTACATGAAGGAAGGTTGCAGGGGCATTGACAAAAGGTACTGGA  
ACTCGCAATGCCGAACTACCCAGTCTTATGTGCGTGCCTCACCATGGATAGCAAAAAAA  
AAGTTGGCTGGCGCTTTATAAGGATAGACACTTCTTGTGTATGTACTGACCATTAAA-

>M. picta MN534427

CTATGGTTATTTTATACTTAAGTTGCATGAAAGCTGCCCAATGAAAGAAGCCAATGTCA



GAGGACAAAGTGGCCTGGCTTATCCGGGTCTTCGGACCCACGGTACTCTGGAGAACATAG  
GTGGGCCGATAGGTGG---TTCAAGAGGAGGTGGACTTCCATCGCTGACAGACACCTTTG  
AGCAGGTTATAGAGGAGCTCCTAGAAGAGGAACAGACCATGAGGCAGAGTGAAGAGAACA  
AGGAC---GACATGTATTCTTCTAGAGTAATGCTGAGCACTCAAGTGCCTTTGGAGCCAC  
CTTTGCTTTTTCTCCTTGAGGAGTACAAAACTACTTGGATGCTGCAAACATGTCCATGA  
GGGTGAGGCGCCACTCTGATCCCGCTCGGCGCGGGGAACTGAGCGTCTGTGACAGTATTA  
GCGAATGGGTGACTGCGGCCGACAAGAAAACCTGCAGTGGACATGGCGGGGCAAACGGTTA  
CAGTTCTGGAAAAGTCCCAGTACCCAAAGGTCAACTGAAACAATATTTCTATGAGACCA  
AATGCAATCCCATGGGCTACATGAAGGAAGGTTGCAGGGGCATTGACAAAAGGTACTGGA  
ACTCGCAATGCCGAACCTACCAGTCTTATGTGCGTGCGCTCACCATGGATAGCAAAAAAA  
AAGTTGGCTGGCGCTTTATAAGGATAGACACTTCTTGTGTATGTACACTGACCATTAAA-

>M. ornata MN534428

--ATGGTTATTTTATACTTAAGTTGCATGAAAGCTGCCCAATGAAAGAAGCCAATGTCA  
GAGGACAAAGTGGCCTGGCTTATCCGGGTCTTCGGACCCATGGTACTCTGGAGAACATAG  
GTGGGCCGATAGGTGG---TTCAAGAGGAGGTGGACTTCCATCGCTGACAGATACATTTG  
AGCAGGTCATAGAGGAGCTCCTAGAAGAGGAACAGACCATGAGGCAGAGTGAAGAGAACA  
AGGAC---GACATGTATTCATCTAGAGTAATGCTGAGCACTCAAGTGCCTTTGGAGCCAC  
CTTTGCTTTTTCTCCTTGAGGAGTACAAAACTACTTGGATGCTGCAAACATGTCCATGA  
GGGTGAGGCGCCACTCTGACCCCGCTCGACGTGGGGAACCTAAGCGTCTGTGACAGTATTA  
GTGAATGGGTGACTGCGGCCGACAAGAAAACCTGCAGTGGACATGGCGGGGCAAACAGTTA  
CTGTTCTCGAAAAGTCCCAGTACCCAAAGGTCAACTGAAACAATATTTCTATGAGACCA  
AATGCAATCCTATGGGCTACATGAAGGAAGGTTGCAGGGGCATTGACAAAAGGTACTGGA  
ACTCGCAATGCCGAACCTACCAGTCTTATGTGCGTGCGCTCACCATGGATAGCAAAAAAA  
AAGTTGGCTGGCGCTTTATAAGGATAGACACTTCTTGTGTATGTACA-----

>M. rubra MN534429

--ATGGTTATTTTATACTTAAGTTGCATGAAAGCTGCCCAATGAAAGAAGCCAATGTCA  
GAGGACAAAGTGGCCTGGCTTATCCGGGTCTTCGGACCCATGGTACTCTGGAGAACATAG  
GTGGGCCGATAGGTGG---TTCAAGAGGAGGTGGACTTCCATCGCTGACAGATACCTTTG

AGCAGGTCATAGAGGAGCTCCTAGAAGAGGAACAGACCATGAGGCAGAGTGAAGAGAACA  
AGGAC---GACATGTATTCATCTAGAGTAATGCTGAGCACTCAAGTGCCTTTGGAGCCAC  
CTTTGCTTTTTCTCCTTGAGGAGTACAAAACTACTTGGATGCTGCAAACATGTCCATGA  
GGGTGAGGCGCCACTCTGACCCAGCTCGACGTGGGGAGCTAAGCGTCTGTGACAGTATTA  
GTGAATGGGTGACTGCGGCCGACAAGAAAACTGCAGTGGACATGGCGGGGCAAACAGTTA  
CTGTTCTCGAAAAAGTCCCAGTACCCAAAGGTCAACTGAAACAATATTTCTATGAGACCA  
AATGCAATCCTATGGGCTACATGAAGGAAGGTTGCAGGGGCATTGACAAAAGGTACTGGA  
ACTCGCAATGCCGAACTACCCAGTCTTATGTGCGTGCGCTCACCATGGATAGCAAAAAAA  
AAGTTGGCTGGCGCTTTATAAGGATAGACACTTCTTGTGTATGTACTGACCATTAAA-

>M. mihintalei MN534430

CTATGGTTATTTCATACTTAAGTTGCATGAAAGCTGCCCAATGAAAGAAGCCAATGTCA  
GAGGACAAAGTGGCCTGGCTTATCCGGGTCTTCGGACCCATGGTACTCTGGAGAACATAG  
GTGGGCCGATAGGTGG---TTCAAGAGGAGGTGGACTTCCATCGCTGACAGATACCTTTG  
AGCAGGTCATAGAGGAGCTCCTAGAAGAGGAACAGACCATGAGGCAGAGTGAAGAGAACA  
AGGAC---GACATGTATTCATCTAGAGTAATGCTGAGCACTCAAGTGCCTTTGGAGCCAC  
CTTTGCTTTTTCTCCTTGAGGAGTACAAAACTACTTGGATGCTGCAAACATGTCCATGA  
GGGTGAGGCGCCACTCTGACCCCGCTCGACGTGGGGAGCTAAGCGTCTGTGACAGTATTA  
GTGAATGGGTGACTGCGGCCGACAAGAAAACTGCAGTGGACATGGCGGGGCAAACAGTTA  
CTGTTCTCGAAAAAGTCCCAGTACCCAAAGGTCAACTGAAACAATATTTCTATGAGACCA  
AATGCAATCCTATGGGCTACATGAAGGAAGGTTGCAGGGGCATTGACAAAAGGTACTGGA  
ACTCGCAATGCCGAACTACCCAGTCTTATGTGCGTGCGCTCACCATGGATAGCAAAAAAA  
AAGTTGGCTGGCGCTTTATAAGGATAGACACTTCTTGTGTATGTACTGACCATTAAAA

>M. aurantiventris MN534431

CTATGGTTATTTCATACTTAAGTTGCATGAAAGCTGCCCAATGAAAGAAACCAATGTCA  
GAGGACAAAGTGGCCTGGCTTATCCGGGTCTTCGGACCCATGGTACTCTGGAGAACATAG  
GCGGGCCGATAGGTGG---TTCAAGAGGAGGTGGACTTCCATCGCTGACCGATACCTTTG  
AGCAGGTTATAGAGGAACTCCTGGAAGAGGAACAGACCATAAGGCAGAGTGAAGAGAACA  
AGGAC---GACATGTATTCATCTAGAGTAATGCTGAGCACTCAAGTGCCTTTGGAGCCAC

CTTTGCTTTTTCTCCTTGAGGAGTACAAAACTACTTGGATGCTGCAAACATGTCCATGA  
GGGTGAGGCGCCACTCCGACCCGGCTCGGCGCGGGGAGCTGAGCGTCTGTGACAGTATTA  
GTGAATGGGTGACTGCGGCCGACAAAAAACTGCAGTGGACATGGCGGGGCAAACGGTTT  
CTGTTCTCGAAAAAGTCCCAGTACCCAAAGGTCAACTGAAACAATATTTCTATGAGACCA  
AATGCAATCCTATGGGCTACATGAAGGAAGGTTGCAGGGGCATTGACAAAAGGTACTGGA  
ACTCGCAATGCCGAACTACCCAGTCTTATGTGCGTGCGCTCACCATGGATAGCAAAAAAA  
AAGTTGGCTGGCGCTTTATAAGGATAGACACTTCTTGTGTATGTACTGACCATTAAA-

>M. butleri MN534432

CTATGGTTATTTTCACTTAAGTTGCATGAAAGCTGCCCAATGAAAGAAACCAATGTCA  
GAGGACAAAGTGGCCTGGCTTATCCGGGTCTTCGGACCCATGGTACTCTGGAGAACATAG  
GCGGGCCGATAGGTGG---TTCAAGAGGAGGTGGACTTCCATCGCTGACCGATACCTTTG  
AGCAGGTTATAGAGGAACCTCGAAGAGGAACAGACCATAAGGCAGAGTGAAGAAAACA  
AGGAC---GACATGTATTCATCTAGAGTAATGCTGAGCACTCAAGTGCCTTTGGAGCCAC  
CTTTGCTTTTTCTCCTTGAGGAGTACAAAACTACTTGGATGCTGCAAACATGTCCATGA  
GGGTGAGGCGCCACTCCGACCCCGCTCGGCGCGGGGAACTGAGCGTCTGTGACAGTATTA  
GTGAATGGGTGACTGCAGCCGACAAAAAACTGCAGTGGACATGGCGGGGCAAACGGTCA  
CTGTTCTCGAAAAAGTCCCAGTACCCAAAGGTCAACTGAAACAATATTTCTATGAGACCA  
AATGCAATCCTATGGGCTACATGAAGGAAGGTTGCAGGGGCATTGACAAAAGGTACTGGA  
ACTCGCAATGCCGAACTACCCAGTCTTATGTGCGTGCGCTCACCATGGATAGCAAAAAAA  
AAGTTGGCTGGCGCTTTATAAGGATAGACACTTCTTGTGTATGTACTGACCATTAAA-

>M. butleri MN534433

CTATGGTTATTTTCACTTAAGTTGCATGAAAGCTGCCCAATGAAAGAAACCAATGTCA  
GAGGACAAAGTGGCCTGGCTTATCCGGGTCTTCGGACCCATGGTACTCTGGAGAACATAG  
GCGGGCCGATAGGTGG---TTCAAGAGGAGGTGGACTTCCATCGCTGACCGATACCTTTG  
AGCAGGTTATAGAGGAACCTCGAAGAGGAACAGACCATAAGGCAGAGTGAAGAGAACA  
AGGAC---GACATGTATTCATCTAGAGTAATGCTGAGCACTCAAGTGCCTTTGGAGCCAC  
CTTTGCTTTTTCTCCTTGAGGAGTACAAAACTACTTGGATGCTGCAAACATGTCCATGA  
GGGTGAGGCGCCACTCCGACCCCGCTCGGCGCGGGGAACTGAGCGTCTGTGACAGTATTA

GTGAATGGGTGACTGCGGCCGACAAAAAACTGCAGTGGACATGGCGGGGCAAACGGTTA  
CTGTTCTCGAAAAAGTCCCAGTACCCAAAGGTCAACTGAAACAATATTTCTATGAGACCA  
AATGCAATCCTATGGGCTACATGAAGGAAGGTTGCAGGGGCATTGACAAAAGGTACTGGA  
ACTCGCAATGCCGAACTACCCAGTCTTATGTGCGTGCGCTCACCATGGATAGCAAAAAAA  
AAGTTGGCTGGCGCTTTATAAGGATAGACACTTCTTGTGTATGTACACTGACCATTAAA-

>M. butleri MN534434

CTATGGTTATTTTCATACTTAAGTTGCATGAAAGCTGCCCAATGAAAGAAACCAATGTCA  
GAGGACAAAGTGGCCTGGCTTATCCGGGTCTTCGGACCCATGGTACTCTGGAGAACATAG  
GCGGGCCGATAGGTGG---TTCAAGAGGAGGTGGACTTCCATCGCTGACCGATACTTTG  
AGCAGGTTATAGAGGAACTACTGGAAGAGGAACAGACCATAAGGCAGAGTGAAGAGAACA  
AGGAC---GACATGTATTCATCTAGAGTAATGCTGAGCACTCAAGTGCCTTTGGAGCCAC  
CTTTGCTTTTTTCTCCTTGAGGAGTACAAAACTACTTGGATGCTGCAAACATGTCCATGA  
GGGTGAGGCGCCACTCCGACCCCTGCAAGGCGCGGGGAACTGAGCGTCTGTGACAGTATTA  
GTGAATGGGTGACTGCGGCCGACAAAAAACTGCAGTGGACATGGCGGGGCAAACGGTCA  
CTGTTCTCGAAAAAGTCCCAGTACCCAAAGGTCAACTGAAACAATATTTCTATGAGACCA  
AATGCAATCCTATGGGCTACATGAAGGAAGGTTGCAGGGGCATTGACAAAAGGTACTGGA  
ACTCGCAATGCCGAACTACCCAGTCTTATGTGCGTGCGCTCACCATGGATAGCAAAAAAA  
AAGTTGGCTGGCGCTTTATAAGGATAGACACTTCTTGTGTATGTACACTGACCATTAAA-

>M. butleri MN534435

CTATGGTTATTTTCATACTTAAGTTGCATGAAAGCTGCCCAATGAAAGAAACCAATGTCA  
GAGGACAAAGTGGCCTGGCTTATCCGGGTCTTCGGACCCATGGTACTCTGGAGAACATAG  
GCGGGCCGATAGGTGG---TTCAAGAGGAGGTGGACTTCCATCGCTGACCGATACTTTG  
AGCAGGTTATAGAGGAACTACTGGAAGAGGAACAGACCATAAGGCAGAGTGAAGAGAACA  
AGGAC---GACATGTATTCATCTAGAGTAATGCTGAGCACTCAAGTGCCTTTGGAGCCAC  
CTTTGCTTTTTTCTCCTTGAGGAGTACAAAACTACTTGGATGCTGCAAACATGTCCATGA  
GGGTGAGGCGCCACTCCGACCCCGCTCGGCGCGGGGAACTGAGCGTCTGTGACAGTATTA  
GTGAATGGGTGACTGCGGCCGACAAAAAACTGCAGTGGACATGGCGGGGCAAACGGTCA  
CTGTTCTCGAAAAAGTCCCAGTACCCAAAGGTCAACTGAAACAATATTTCTATGAGACCA

AATGCAATCCTATGGGCTACATGAAGGAAGGTTGCAGGGGCATTGACAAAAGGTACTGGA  
ACTCGCAATGCCGAACTACCCAGTCTTATGTGCGTGCGCTCACCATGGATAGCAAAAAAA  
AAGTTGGCTGGCGCTTTATAAGGATAGACACTTCTTGTGTATGTACTGACCATTAAA-

>M. butleri MN534436

CTATGGTTATTTTCATACTTAAGTTGCATGAAAGCTGCCCAATGAAAGAAACCAATGTCA  
GAGGACAAAGTGGCCTGGCTTATCCGGGTCTTCGGACCCATGGTACTCTGGAGAACATAG  
GCGGGCCGATAGGTGG---TTCAAGAGGAGGTGGACTTCCATCGCTGACCGATACTTTG  
AGCAGGTTATAGAGGAACTCCTGGAAGAGGAACAGACCATAAGGCAGAGTGAAGAGAACA  
AGGAC---GACATGTATTTCATCTAGAGTAATGCTGAGCACTCAAGTGCCTTTGGAGCCAC  
CTTTGCTTTTTCTCCTTGAGGAGTACAAAACTACTTGGATGCTGCAAACATGTCCATGA  
GGGTGAGGCGCCACTCCGACCCCGCTCGGCGCGGGGAACTGAGCGTCTGTGACAGTATTA  
GTGAATGGGTGACTGCGGCCGACAAAAAACTGCAGTGGACATGGCGGGGCAAACGGTCA  
CTGTTCTCGAAAAAGTCCCAGTACCCAAAGGTCAACTGAAACAATATTTCTATGAGACCA  
AATGCAATCCTATGGGCTACATGAAGGAAGGTTGCAGGGGCATTGACAAAAGGTACTGGA  
ACTCGCAATGCCGAACTACCCAGTCTTATGTGCGTGCGCTCACCATGGATAGCAAAAAAA  
AAGTTGGCTGGCGCTTTATAAGGATAGACACTTC-----

>M. zeylanica MN534437

--ATGGTTATTTTCATACTTAAGTTGCATGAAAGCTGCCCAATGAAAGAAGCCAATGTCA  
GAGGACAAAGTGGCCTGGCTTATCCGGGTCTTCGGACCCATGGTACTCTGGAGAACATAG  
GCGGGCCGATAGGTGG---TTCAAGAGGAGGTGGACTTCCATCGCTGACAGACACCTTTG  
AGCAGGTTATAGAGGAACTCCTGGAAGAGGAACAGACCATAAGGCAGAGTGAAGAGAACA  
AGGAC---GACATGTATTCTTCTAGAGTAATGCTGAGCACTCAAGTGCCTTTGGAGCCAC  
CTTTGCTTTTTCTTCTTGAGGAGTACAAAACTACTTGGATGCGGCAAACATGTCCATGC  
GGGTGAGGCGCCACTCCGACCCCGCTCGGCGCGGGGAACTGAGCGTCTGTGACAGTATTA  
GTGAATGGGTGACTGCGGCCGACAAGAAAACTGCAGTGGACATGGCGGGGCAAACAGTTA  
CTGTTCTCGAAAAAGTCCCAGTACCCAAAGGTCAACTGAAACAATATTTCTATGAGACCA  
AATGCAATCCTATGGGCTACATGAAGGAAGGTTGCAGGGGCATAGACAAAAGGCACTGGA  
AA-----

-----  
>M. karunaratnei MN534438

--ATGGTTATTTTCATACTTAAGTTGCATGAAAGCTGCCCAATGAAAGAAGCCAATGTCA  
GAGGACAAAGTGGCCTGGCTTATCCGGGTCTTCGGACCCATGGTACTCTGGAGAACATAG  
GCGGGCCGATAGGTGG---TTCAAGAGGAGGTGGACTTCCATCGCTGACAGACACCTTTG  
AGCAGGTTATAGAGGAACTCCTGGAAGAGGAACAGACCATAAGGCAGAGTGAAGAGAACA  
AGGAC---GACATGTATTCATCTAGAGTAATGCTGAGCACTCAAGTGCCTTTGGAGCCAC  
CTTTGCTTTTTTCTTCTTGAGGAGTACAAAACTACTTGGATGCGGCAAACATGTCCATGC  
GGGTGAGGCGCCACTCCGACCCCGCTCGGCGCGGGGAACTGAGCGTCTGTGACAGTATTA  
GTGAATGGGTGACTGCGGCCGACAAGAAAACTGCAGTGGACATGGCGGGGCAAACAGTTA  
CTGTTCTCGAAAAAGTCCCAGTACCCAAAGGTCAACTGAAACAATATTTCTATGAGACCA  
AATGCAATCCTATGGGCTACATGAAGGAAGGTTGCAGGGGCATTGACAAAAGGTACTGGA  
ACTCGCAATGCCGAACTACCCAGTCTTACGTGCGTGCGCTCACCATGGATAGCAAAAAAA  
AAGTTGGCTGGCGCTTTATAAGGATAGACACTTCTTGC GTATGTACACTGACCATTAAA-

>Microhyla sp. 2 MN534439

--ATGGTTATTTTCATACTTAAGTTGCATGAAAGCTGCCCAATGAAAGAAGCCAATGTCA  
GAGGACAAAGTGGCCTGGCTTATCCGGGTCTTCGGACCCATGGTACTCTGGAGAACATAG  
GCGGGCCGATAGGTGG---TTCAAGAGGAGGTGGACTTCCATCGCTGACCGATACCTTTG  
AGCAGGTTATAGAGGAACTCCTGGAAGAGGAACAGACCATAAGGCAGAGTGAAGAGAACA  
AGGAC---GACATGTATTCATCTAGAGTAATGCTGAGCACTCAAGTGCCTTTGGAGCCAC  
CTTTGCTTTTTTCTTCTTGAGGAGTACAAAACTACTTGGATGCTGCAAACATGTCCATGA  
GGGTGAGGCGCCACTCCGACCCCGCTCGGCGCGGGGAACTGAGCGTCTGTGACAGTATTA  
GCGAATGGGTGACTGCGGCCGACAAGAAAACTGCAGTGGACATGGCGGGGCAAACGGTTA  
CTGTTCTCGAAAAAGTCCCAGTACCCAAAGGTCAACTGAAACAATATTTCTATGAGACCA  
AATGCAATCCTATGGGCTACATGAAGGAAGGTTGCAGGGGCATTGACAAAAGGTACTGGA  
ACTCGCAATGCCGAACTACCCAGTCTTATGTGCGTGCGCTCACCATGGATAGCAAAAAAA  
AAGTTGGCTGGCGCTTTATAAGGATAGACACTTCTTGTGTATGTACACTGACCATTAAA-

>Microhyla sp. 2 MN534440

--ATGGTTATTTTCATACTTAAGTTGCATGAAAGCTGCCCAATGAAAGAAGCCAATGTCA  
GAGGACAAAGTGGCCTGGCTTATCCGGGTCTTCGGACCCATGGTACTCTGGAGAACATAG  
GCGGGCCGATAGGTGG---TTCAAGAGGAGGTGGACTTCCATCGCTGACCGATACTTTG  
AGCAGGTTATAGAGGAACTCCTGGAAGAGGAACAGACCATAAGGCAGAGTGAAGAGAACA  
AGGAC---GACATGTATTCATCTAGAGTAATGCTGAGCACTCAAGTGCCTTTGGAGCCAC  
CTTTGCTTTTTCTTCTTGAGGAGTACAAAACTACTTGGATGCTGCAAACATGTCCATGA  
GGGTGAGGCGCCACTCCGACCCCGCTCGGCGCGGGGAACTGAGCGTCTGTGACAGTATTA  
GCGAATGGGTGACTGCGGCCGACAAGAAAACTGCAGTGGACATGGCGGGGCAAACGGTTA  
CTGTTCTCGAAAAAGTCCCAGTACCCAAAGGTCAACTGAAACAATATTTCTATGAGACCA  
AATGCAATCCTATGGGCTACATGAAGGAAGGTTGCAGGGGCATTGACAAAAGGTACTGGA  
ACTCGCAATGCCGAACTACCCAGTCTTATGTGCGTGCCTCACCATGGATAGCAAAAAAA  
AAGTTGGCTGGCGCTTTATAAGGATAGACACTTCTTGTGTATGTACTGACCATTAAA-

>M. superciliaris MN534441

-----GCTGCCCAATGAAAGAAGCCAATGTCA  
GAGGACAAAGTGGCCTGGCTTATCCGGGTCTTCGGACCCATGGTACTCTGGAGAACATAG  
GCGGGCCGATAGGTGG---TTCAAGAGGAGGTGGACTTCCATCGCTGACAGATACTTTG  
AGCAGGTTATAGAGGAACTCCTGGAAGAGGAACAGACCATAAGACAGAGTGAAGAGAACA  
AGGAC---GACATGTATTCATCTAGAGTAATGCTGAGCACTCAAGTGCCTTTGGAGCCAC  
CTTTGCTTTTTCTTCTTGAGGAGTACAAAACTACTTGGATGCTGCAAACATGTCCATGA  
GGGTGAGGCGCCACTCCGACCCCGCTCGGCGCGGGGAACTGAGCGTCTGTGACAGTATTA  
GTGAGTGGGTGACTGCGGCCGACAAGAAAACTGCAGTGGACATGGCGGGGCAAACAGTTA  
CTGTTCTCGAAAAAGTCCCAGTACCCAAAGGTCAACTGAAACAATATTTCTATGAGACCA  
AATGCAATCCTATGGGCTACATGAAGGAAGGTTGCAGGGGCATTGACAAAAGGTACTGGA  
ACTCGCAATGCCGAACTACCCAGTCTTA-----  
-----

>M. annectens MN534442

CTATGGTTATTTTCATACTTAAGTTGCATGAAAGCTGCCCAATGAAGGAAGCCAATGTCA

GAGGACAAAGTGGCCTGGCTTATCCGGGTCTTCGGACCCACGGTACTCTGGAGAACATAG  
GTGGGCCGGTAGGTGG---TTCAAGAGGAGGTGGACTTCCATCCCTGACAGATACCTTTG  
AGCAGGTTATAGAGGAACTCCTAGAAGAGGAACAGACCATAAGGCAGAGTGAGGAGAACA  
AGGAC---GACATGTATTCATCTAGAGTTATGCTGAGCACTCAAGTGCCTTTGGAGCCAC  
CTTTGCTTTTTCTCCTTGAGGAGTACAAAACTACTTGGATGCTGCAAACATGTCCATGA  
GGGTGAGGCGCCACTCTGACCCCGCTCGACGTGGGGAAGTGGAGCGTCTGTGACAGTATTA  
GCGAATGGGTGACTGCGGCCGACAAGAAAAGTGCAGTGGACATGGCGGGGCAAACAGTTA  
CTGTTCTCGAAAAAGTCCCAGTACCCAAAGGTCAACTGAAACAATATTTCTATGAGACCA  
AATGCAATCCTATGGGCTACATGAAGGAAGGTTGCAGGGGCATTGATAAAAGGTACTGGA  
ACTCGCAATGCCGAAGTACCCAAATCTTATGTGCGTGCGCTCACCATGGATAGCAAAAAAA  
AAGTTGGCTGGCGCTTTATAAGGATAGACACTTCTTGTGTATGTACTGACCATTAAA-

>M. annamensis MN534443

CGATGGTTATTTTATACTTAAGTTGCATGAAAGCTGCCCAATGAAGGAAGCCAATGTCA  
GAGGACAAAGTGGCCTGGCTTATCCGGGTCTTCGGACCCACGGTACTCTGGAGAACATAG  
GTGGGCCGATAGGTGG---TTCAAGAGGAGGTGGACTTTCATCACTGACAGATACCTTTG  
AGCAGGTTATAGAGGAACTCCTAGAAGAGGAACAGACCATAAGGCAGAGTGAAGAGAACA  
AGGAC---GACATGTATTCATCTAGAGTTATGCTGAGCACTCAAGTGCCTTTGGAGCCAC  
CTTTGCTTTTTCTCCTTGAGGAGTACAAAACTACTTGGATTCTGCAAACATGTCCATGA  
GGGTGAGGCGCCACTCTGACCCTGCTCGACGCGGGGAAGTGGAGCGTCTGTGACAGTATTA  
GCGAATGGGTGACTGCGGCCGACAAGAAAAGTGCAGTGGACATGGCGGGGCAAACAGTTA  
CTGTTCTCGAAAAAGTCCCAGTACCCAAAGGTCAACTGAAACAATATTTCTATGAGACCA  
AATGCAATCCTATGGGCTACATGAAGGAAGGTTGCAGGGGCATTGACAAAAGGTACTGGA  
ACTCGCAATGCCGAAGTACCCAGTCTTATGTGCGTGCGCTCACCATGGATAGCAAAAAAA  
AAGTTGGCTGGCGCTTTATAAGGATAGACACTTCTTGTGTATGTACTGACCATTAAA-

>M. nanapollexa MN534444

CGATGGTTATTTTATACTTAAGTTGCATGAAAGCTGCCCAATGAAGGAAGCCAATGTCA  
GAGGACAAAGTGGCCTGGCTTATCCGGGTCTTCGGACCCATGGTACTCTGGAGAACATAG  
GTGGGCCGATAGGTGG---TTCAAGAGGAGGTGGACTTCCATCCCTGACAGATGCCTTTG



AGCAGGTTATAGAGGAACTCCTAGAAGAGGAACAGACCATAAGGCAGAGTGAAGAGAACA  
AGGAC---GACATGTATTCATCTAGAGTTATGCTGAGCACTCAAGTGCCTTTGGAGCCAC  
CTTTGCTTTTTCTCCTTGAGGAGTACAAAACTACTTGGATGCTGCAAACATGTCCATGA  
GGGTGAGGCGCCACTCTGACCCCGCTCGACGTGGGGAAGTGAAGCGTCTGTGACAGTATTA  
GCGAATGGGTGACTGCGGCCGACAAGAAAACTGCAGTGGACATGGCGGGGCAAACGGTTA  
CTGTTCTCGAAAAAGTCCCTGTACCCAAGGGTCAACTGAAACAATATTTCTATGAGACCA  
AATGCAATCCTATGGGCTACATGAAGGAAGGTTGCAGGGGCATTGACAAAAGGTACTGGA  
ACTCGCAATGCCGAAGTACCCAGTCTTATGTGCGCGCTCACCATGGATAGCAAAAAAA  
AAGTTGGCTGGCGCTTTATAAGGATAGACACTTCTTGTGTATGTACTGACCATTAAA-

>M. marmorata MN534445

CGATGGTTATTTCACTTAAGTTGCATGAAAGCTGCCCAATGAAGGAAGCCAATGTCA  
GAGGACAAAGTGGCCTGGCTTATCCGGGTCTTCGGACCCACGGTACTCTGGAGAACATAG  
GTGGGCCGATAGGTGG---TTCAAGAGGAGGTGGACTTCCATCACTGACAGATACCTTTG  
AGCAGGTTATAGAGGAACTCCTAGAAGAGGAACAGACCATAAGGCAGAGTGAAGAGAACA  
AGGAC---GACATGTATTCATCTAGAGTTATGCTGAGCACTCAAGTGCCTTTGGAGCCAC  
CTTTGCTTTTTCTCCTTGAGGAGTACAAAACTACTTGGATGCTGCAAACATGTCCATGA  
GGGTGAGGCGCCACTCTGACCCCGCTCGACGTGGGGAAGTGAAGCGTCTGTGACAGTATTA  
GCGAATGGGTGACTGCGGCCGACAAGAAAACTGCAGTGGACATGGCGGGGCAAACAGTTA  
CTGTTCTCGAAAAAGTCCAGTACCCAAAGGTCAACTGAAACAATATTTCTATGAGACCA  
AATGCAATCCTATGGGCTACATGAAGGAAGGTTGCAGGGGCATTGACAAAAGGTACTGGA  
ACTCGCAATGCCGAAGTACCCAGTCTTATGTGCGTGCCTCACCATGGATAGCAAAAAAA  
AAGTTGGCTGGCGCTTTATAAGGATAGACACTTCTTGTGTATGTACTGACCATTAAA-

>M. arboricola MN534446

CGATGGTTATTTCACTTAAGTTGCATGAAAGCTGCCCAATGAAGGAAGCCAATGTCA  
GAGGACAAAGTGGCCTGGCTTATCCGAGTCTTCGGACCCACGGTACTCTGGAGAACATAG  
GTGGGCCGATAGGTGG---TTCAAGAGGAGGTGGACTTCCATCCCTGACCGATACCTTTG  
AGCAGGTTATAGAGGAACTCCTAGAAGAGGAACAGTCAATAAGGCAGAGTGAAGAGAACA  
AGGAC---GACATGTATTCATCTAGAGTTATGCTGAGCACTCAAGTGCCTTTGGAGCCAC

CTTTGCTTTTTCTCCTTGAGGAGTACAAAACTATTTGGATGCTGCAAACATGTCCATGA  
GGGTGAGGCGCCACTCTGACCCTGCTCGACGTGGGGAAGTGGAGCGTCTGTGACAGTATAA  
GCGAATGGGTGACTGCGGCCGACAAGAAAACTGCAGTGGACATGGCGGGGCAAACAGTTA  
CTGTTCTTGAAAAAGTCCCAGTACCCAAAGGTCAACTGAAACAATATTTCTATGAGACCA  
AATGCAATCCTATGGGCTACATGAAGGAAGGTTGCAGGGGCATTGACAAAAGGTACTGGA  
ACTCGCAATGCCGAAGTACCCAGTCTTATGTGCGTGCGCTCACCATGGATAGCAAAAAAA  
AAGTTGGCTGGCGCTTTATAAGGATAGACACTTCTTGTGTATGTACTGACCATTAAA-

>M. arboricola MN534447

CGATGGTTATTTTCATACTTAAGTTGCATGAAAGCTGCCCAATGAAGGAAGCCAATGTCA  
GAGGACAAAGTGGCCTGGCTTATCCGAGTCTTCGGACCCACGGTACTCTGGAGAACATAG  
GTGGGCCGATAGGTGG---TTCAAGAGGAGGTGGACTTCCATCCCTGACAGATACCTTTG  
AGCAGGTTATAGAGGAAGTCCTAGAAGAGGAACAGTCAATAAGGCAGAGTGAAGAGAACA  
AGGAC---GACATGTATTCATCTAGAGTTATGCTGAGCACTCAAGTGCCTTTGGAGCCAC  
CTTTGCTTTTTCTCCTTGAGGAGTACAAAACTATTTGGATGCTGCAAACATGTCCATGA  
GGGTGAGGCGCCACTCTGACCCCGCTCGACGTGGGGAAGTGGAGCGTCTGTGACAGTATAA  
GCGAATGGGTGACTGCGGCCGACAAGAAAACTGCAGTGGACATGGCGGGGCAAACAGTTA  
CTGTTCTCGAAAAAGTCCCAGTACCCAAAGGTCAACTGAAACAATATTTCTATGAGACCA  
AATGCAATCCTATGGGCTACATGAAGGAAGGTTGCAGGGGCATTGACAAAAGGTACTGGA  
ACTCGCAATGCCGAAGTACCCAGTCTTATGTGCGTGCGCTCACCATGGATAGCAAAAAAA  
AAGTTGGCTGGCGCTTTATAAGGATAGACACTTCTTGTGTATGTACTGACCATTAAA-

>M. pulchella MN534448

CGATGGTTATTTTCATACTTAAGTTGCATGAAAGCTGCCCAATGAAGGAAGCCAATGTCA  
GAGGACAAAGTGGCCTGGCTTATCCGGGTCTTCGGACCCACGGTACTCTGGAGAACATAG  
GTGGGCCGATAGGTGG---TTCAAGAGGAGGTGGACTTCCATCCCTGACAGATACCTTTG  
AGCAGGTTATAGAGGAAGTCCTAGAAGAGGAACAGTCAATAAGGCAGAGTGAAGAGAACA  
AGGAC---GACATGTATTCATCTAGAGTTATGCTGAGCACTCAAGTGCCTTTGGAGCCAC  
CTTTGCTTTTTCTCCTTGAGGAGTACAAAACTACTTGGATGCTGCAAACATGTCCATGA  
GGGTGAGGCGCCACTCTGACCCCGCTCGACGTGGGGAAGTGGAGCGTCTGTGACAGTATTA

GCGAATGGGTGACTGCGGCCGACAAGAAAACCTGCAGTGGACATGGCGGGGCAAACAGTTA  
CTGTTCTCGAAAAAGTCCCAGTACCCAAAGGTCAACTGAAACAATATTTCTATGAGACCA  
AATGCAATCCTATGGGCTACATGAAGGAAGGTTGCAGGGGCATTGACAAAAGGTACTGGA  
ACTCGCAATGCCGAACCTACCCAGTCTTATGTGCGTGCGCTCACCATGGATAGCAAAAAAA  
AAGTTGGCTGGCGCTTTATAAGGATAGACACTTCTTGTGTATGTACTGACCATTAAA-

>Micryletta nigromaculata MN534449

CTAGGGTTATTTTCATACTTAAGTTGCATGAAAGCTGCCCAATGAAAGAAGCCAATGTCA  
GAGGACAAAGTGGCCTGGCTTATCCAGGTCTTCGGACCCACGGTACTTTGGAGAACATAG  
GTGGGCCGATAGGTGG---TTCAAGAGGAGGTGGCCTTCCATCCCTGACAGATACCTTTG  
AGCATGTTATAGAGGAACCTTAGAAGAGGAACAGAACATAAGGCAGAGTGAAGAGAACA  
AAGACTCAGACATGTATTCATCTAGAGTTATGCTGAGCACTCAAGTGCCTTTGGAGCCGC  
CTTTGCTTTTTCTCCTTGAGGAGTACAAAACTACCTGGATGCTGCAAACATGTCCATGA  
GGGTGAGGCGCCACTCTGACCCCGCTCGACGTGGGGAACCTGAGCGTCTGTGACAGTATTA  
GTGAATGGGTGACAGCAGCAGACAAGAAAACCTGCAGTGGACATGGCAGGGCAAACCTGTTA  
CTGTTCTTGAAAAAGTCCCAGTACCCAAAGGTCAACTGAAACAATATTTCTATGAGACCA  
AATGCAATCCTATGGGCTACATGAAGGAAGGTTGCAGGGGCATTGACAAAAGGTACTGGA  
ACTCGCAATGCCGAACCTACCCAGTCTTATGTGCGTGCGCTCACAATGGATAGCAAAAAAA  
AAGTTGGCTGGCGCTTTATAAGGATAGACACTTCTTGTGTATGTACTGACCATTAAA-
